# Supplementary material
Source: ML conference proceedings conference paper supplement (https://proceedings.neurips.cc/paper_files/paper/2022/hash/7b102c908e9404dd040599c65db4ce3e-Abstract.html)
Supplement: Supplementary file 1 [file 7b102c908e9404dd040599c65db4ce3e-Supplemental-Conference.zip]

Archive with 30 entries (24 files):
- 663_multivariate_time_series_forec-Supplementary Material/
- 663_multivariate_time_series_forec-Supplementary Material/appendix.pdf
- 663_multivariate_time_series_forec-Supplementary Material/code/
- 663_multivariate_time_series_forec-Supplementary Material/code/config.py
- 663_multivariate_time_series_forec-Supplementary Material/code/data/
- 663_multivariate_time_series_forec-Supplementary Material/code/data/dataset.py
- 663_multivariate_time_series_forec-Supplementary Material/code/data/data_process.py
- 663_multivariate_time_series_forec-Supplementary Material/code/data/PeMS/
- 663_multivariate_time_series_forec-Supplementary Material/code/data/PeMS/stable_pretext.npy
- 663_multivariate_time_series_forec-Supplementary Material/code/data/PeMS/time_stamp.npy
- 663_multivariate_time_series_forec-Supplementary Material/code/data/PeMS/V_228.csv
- 663_multivariate_time_series_forec-Supplementary Material/code/data/PeMS/W_228.csv
- 663_multivariate_time_series_forec-Supplementary Material/code/data/__init__.py
- 663_multivariate_time_series_forec-Supplementary Material/code/main.py
- 663_multivariate_time_series_forec-Supplementary Material/code/main_stamp.py
- 663_multivariate_time_series_forec-Supplementary Material/code/models/
- 663_multivariate_time_series_forec-Supplementary Material/code/models/Layers.py
- 663_multivariate_time_series_forec-Supplementary Material/code/models/predict.py
- 663_multivariate_time_series_forec-Supplementary Material/code/models/predict_2.py
- 663_multivariate_time_series_forec-Supplementary Material/code/models/STAGNN.py
- 663_multivariate_time_series_forec-Supplementary Material/code/models/STAGNN_stamp.py
- 663_multivariate_time_series_forec-Supplementary Material/code/models/SubLayers.py
- 663_multivariate_time_series_forec-Supplementary Material/code/models/TransformerLayers.py
- 663_multivariate_time_series_forec-Supplementary Material/code/models/__init__.py
- 663_multivariate_time_series_forec-Supplementary Material/code/README.md
- 663_multivariate_time_series_forec-Supplementary Material/code/requirements.txt
- 663_multivariate_time_series_forec-Supplementary Material/code/synthetic_mtsdata.py
- 663_multivariate_time_series_forec-Supplementary Material/code/utils/
- 663_multivariate_time_series_forec-Supplementary Material/code/utils/utils.py
- 663_multivariate_time_series_forec-Supplementary Material/code/utils/__init__.py
