# Supplementary material
Source: ML conference proceedings conference paper supplement (https://proceedings.neurips.cc/paper_files/paper/2022/hash/7b102c908e9404dd040599c65db4ce3e-Abstract.html)
Supplement: Supplementary file 1 [file 7b102c908e9404dd040599c65db4ce3e-Supplemental-Conference.zip › 663_multivariate_time_series_forec-Supplementary Material/code/data/data_process.py]

from datetime import time
import os
import torch
import numpy as np
import pandas as pd
from sklearn.preprocessing import StandardScaler, OneHotEncoder
cycle = 12*24

data = pd.read_csv('data/PeMS/V_228.csv', header=None).values.astype(float)
T, N = data.shape
time_stamp = np.zeros(T)
for idx in range(T):
    time_stamp[idx] = idx % cycle
root = r'/home/lyj_11921026/liuqinxian/IJCAI/STAGNN/data/PeMS'
name = "time_stamp.npy"
np.save(os.path.join(root, name), time_stamp)
