# Supplementary material
Source: ML conference proceedings conference paper supplement (https://proceedings.neurips.cc/paper_files/paper/2022/hash/7b102c908e9404dd040599c65db4ce3e-Abstract.html)
Supplement: Supplementary file 1 [file 7b102c908e9404dd040599c65db4ce3e-Supplemental-Conference.zip › 663_multivariate_time_series_forec-Supplementary Material/code/data/dataset.py]

import os
import torch
import numpy as np
import pandas as pd
from sklearn.preprocessing import StandardScaler, OneHotEncoder


def transform(data: torch.Tensor, train: bool, opt: object, start: int) -> torch.Tensor:
    '''
    predict speed in 15 minutes according to speed 1 hour ago IN A DAY
    ie. x.shape = [n_his, routes] and y.shape = [n_pred, routes]
    then, concat head and tail to the data and label  
    '''
    if opt.mode == 1:
        n_his = opt.n_his
        n_pred = opt.n_pred
        n_route = opt.n_route
        day_slot = opt.day_slot
        T4N_step = opt.T4N['step']
        
        n_day = len(data) // day_slot
        n_slot = 288 * n_day

        if train:
            n_slot = day_slot - n_his - n_pred - T4N_step + 2
            x = torch.zeros(n_day * n_slot, 1, n_his, n_route)
            y = torch.zeros(n_day * n_slot, 1, n_pred + T4N_step - 1, n_route)
        else:
            n_slot = day_slot - n_his - n_pred + 1
            x = torch.zeros(n_day * n_slot, 1, n_his, n_route)
            y = torch.zeros(n_day * n_slot, 1, n_pred, n_route)

        for i in range(n_day):
            for j in range(n_slot):
                t = i * n_slot + j
                s = i * day_slot + j
                e = s + n_his
                x[t, :, :, :] = data[s : e].reshape(1, n_his, n_route)
                if train:
                    length = n_pred + T4N_step - 1
                    y[t, :, :, :] = data[e : e + length].reshape(1, length, n_route)
                else:
                    y[t, :, :, :] = data[e : e + n_pred].reshape(1, n_pred, n_route)
                
        x = x.permute(0, 3, 2, 1)   # [slots, 1, n_his, n_route] -> [slots, n_route, n_his, 1]
        y = y.permute(0, 3, 2, 1)   # [slots, 1, n_pred, n_route] -> [slots, n_route, n_pred, 1]
        return x, y
    
    elif opt.mode == 2:
        n_his = opt.n_his
        n_pred = opt.n_pred
        n_route = opt.n_route
        T4N_step = opt.T4N['step']
        
        if train:
            total_len = data.shape[0] - 30 - n_his + 1
        else:
            total_len = data.shape[0] - 24 - n_his + 1
        
        x = torch.zeros(total_len, 1, n_his, n_route)
        if train:
            y = torch.zeros(total_len, 1, n_pred + T4N_step - 1, n_route)
        else:
            y = torch.zeros(total_len, 1, n_pred, n_route)
        
        for i in range(total_len):
            x[i, :, :, :] = data[i : i+n_his].reshape(1, n_his, n_route)
            
            if train:
                s = i + n_his
                index = [s+2, s+5, s+11, s+17, s+23, s+29]
                y[i, :, :, :] = data[index, :].reshape(1, n_pred + T4N_step - 1, n_route)
            else:
                s = i + n_his
                index = [s+2, s+5, s+11, s+17, s+23]
                y[i, :, :, :] = data[index, :].reshape(1, n_pred, n_route)         

        x = x.permute(0, 3, 2, 1)   # [slots, 1, n_his, n_route] -> [slots, n_route, n_his, 1]
        y = y.permute(0, 3, 2, 1)   # [slots, 1, n_pred, n_route] -> [slots, n_route, n_pred, 1]
        return x, y
    
def transform_7(data: torch.Tensor, train: bool, opt: object, start: int, sub_label: torch.Tensor) -> torch.Tensor:
    '''
    predict speed in 15 minutes according to speed 1 hour ago IN A DAY
    ie. x.shape = [n_his, routes] and y.shape = [n_pred, routes]
    then, concat head and tail to the data and label  
    '''
    if opt.mode == 1:
        n_his = opt.n_his
        n_pred = opt.n_pred
        n_route = opt.n_route
        day_slot = opt.day_slot
        T4N_step = opt.T4N['step']
        
        n_day = len(data) // day_slot
        n_slot = 288 * n_day

        if train:
            n_slot = day_slot - n_his - n_pred - T4N_step + 2
            x = torch.zeros(n_day * n_slot, 1, n_his, n_route)
            y = torch.zeros(n_day * n_slot, 1, n_pred + T4N_step - 1, n_route)
            z = torch.zeros(n_day * n_slot, 6, n_pred + T4N_step - 1, n_route)
        else:
            n_slot = day_slot - n_his - n_pred + 1
            x = torch.zeros(n_day * n_slot, 1, n_his, n_route)
            y = torch.zeros(n_day * n_slot, 1, n_pred, n_route)
            z = torch.zeros(n_day * n_slot, 6, n_pred, n_route)

        for i in range(n_day):
            for j in range(n_slot):
                t = i * n_slot + j
                s = i * day_slot + j
                e = s + n_his
                x[t, :, :, :] = data[s : e].reshape(1, n_his, n_route)
                if train:
                    length = n_pred + T4N_step - 1
                    y[t, :, :, :] = data[e : e + length].reshape(1, length, n_route)
                    z[t, :, :, :] = sub_label[e : e + length].reshape(6, length, n_route)
                else:
                    y[t, :, :, :] = data[e : e + n_pred].reshape(1, n_pred, n_route)
                    z[t, :, :, :] = sub_label[e : e + n_pred].reshape(6, n_pred, n_route)
          
        x = x.permute(0, 3, 2, 1)   # [slots, 1, n_his, n_route] -> [slots, n_route, n_his, 1]
        y = y.permute(0, 3, 2, 1)   # [slots, 1, n_pred, n_route] -> [slots, n_route, n_pred, 1]
        z = z.permute(0, 3, 2, 1)
        return x, y, z
    
    elif opt.mode == 2:
        n_his = opt.n_his
        n_pred = opt.n_pred
        n_route = opt.n_route
        T4N_step = opt.T4N['step']
        
        if train:
            total_len = data.shape[0] - 30 - n_his + 1
        else:
            total_len = data.shape[0] - 24 - n_his + 1
        
        x = torch.zeros(total_len, 1, n_his, n_route)
        if train:
            y = torch.zeros(total_len, 1, n_pred + T4N_step - 1, n_route)
        else:
            y = torch.zeros(total_len, 1, n_pred, n_route)
        
        for i in range(total_len):
            x[i, :, :, :] = data[i : i+n_his].reshape(1, n_his, n_route)
            
            if train:
                s = i + n_his
                index = [s+2, s+5, s+11, s+17, s+23, s+29]
                y[i, :, :, :] = data[index, :].reshape(1, n_pred + T4N_step - 1, n_route)
            else:
                s = i + n_his
                index = [s+2, s+5, s+11, s+17, s+23]
                y[i, :, :, :] = data[index, :].reshape(1, n_pred, n_route)         

        x = x.permute(0, 3, 2, 1)   # [slots, 1, n_his, n_route] -> [slots, n_route, n_his, 1]
        y = y.permute(0, 3, 2, 1)   # [slots, 1, n_pred, n_route] -> [slots, n_route, n_pred, 1]
        return x, y
    
def transform_time(data: torch.Tensor, train: bool, opt: object, start: int, time_stamp: torch.Tensor) -> torch.Tensor:
    '''
    predict speed in 15 minutes according to speed 1 hour ago IN A DAY
    ie. x.shape = [n_his, routes] and y.shape = [n_pred, routes]
    then, concat head and tail to the data and label  
    '''
    if opt.mode == 1:
        n_his = opt.n_his
        n_pred = opt.n_pred
        n_route = opt.n_route
        day_slot = opt.day_slot
        T4N_step = opt.T4N['step']
        
        n_day = len(data) // day_slot
        n_slot = 288 * n_day

        if train:
            n_slot = day_slot - n_his - n_pred - T4N_step + 2
            x = torch.zeros(n_day * n_slot, 1, n_his, n_route)
            stamp = torch.zeros(n_day * n_slot, n_his)
            y = torch.zeros(n_day * n_slot, 1, n_pred + T4N_step - 1, n_route)
            
        else:
            n_slot = day_slot - n_his - n_pred + 1
            x = torch.zeros(n_day * n_slot, 1, n_his, n_route)
            stamp = torch.zeros(n_day * n_slot, n_his)
            y = torch.zeros(n_day * n_slot, 1, n_pred, n_route)

        for i in range(n_day):
            for j in range(n_slot):
                t = i * n_slot + j
                s = i * day_slot + j
                e = s + n_his
                x[t, :, :, :] = data[s : e].reshape(1, n_his, n_route)
                stamp[t,:] = time_stamp[s:e].reshape(n_his)
                if train:
                    length = n_pred + T4N_step - 1
                    y[t, :, :, :] = data[e : e + length].reshape(1, length, n_route)
                else:
                    y[t, :, :, :] = data[e : e + n_pred].reshape(1, n_pred, n_route)
          
        x = x.permute(0, 3, 2, 1)   # [slots, 1, n_his, n_route] -> [slots, n_route, n_his, 1]
        y = y.permute(0, 3, 2, 1)   # [slots, 1, n_pred, n_route] -> [slots, n_route, n_pred, 1]
        
        return x, stamp, y
    
    elif opt.mode == 2:
        n_his = opt.n_his
        n_pred = opt.n_pred
        n_route = opt.n_route
        T4N_step = opt.T4N['step']
        
        if train:
            total_len = data.shape[0] - 30 - n_his + 1
        else:
            total_len = data.shape[0] - 24 - n_his + 1
        
        x = torch.zeros(total_len, 1, n_his, n_route)
        if train:
            y = torch.zeros(total_len, 1, n_pred + T4N_step - 1, n_route)
        else:
            y = torch.zeros(total_len, 1, n_pred, n_route)
        
        for i in range(total_len):
            x[i, :, :, :] = data[i : i+n_his].reshape(1, n_his, n_route)
            
            if train:
                s = i + n_his
                index = [s+2, s+5, s+11, s+17, s+23, s+29]
                y[i, :, :, :] = data[index, :].reshape(1, n_pred + T4N_step - 1, n_route)
            else:
                s = i + n_his
                index = [s+2, s+5, s+11, s+17, s+23]
                y[i, :, :, :] = data[index, :].reshape(1, n_pred, n_route)         

        x = x.permute(0, 3, 2, 1)   # [slots, 1, n_his, n_route] -> [slots, n_route, n_his, 1]
        y = y.permute(0, 3, 2, 1)   # [slots, 1, n_pred, n_route] -> [slots, n_route, n_pred, 1]
        return x, y


class STAGNN_Dataset(torch.utils.data.Dataset):
    def __init__(self, opt: object, train: bool, val: bool) -> torch.Tensor:
        '''
        split data to Train/Val/Test dataset
        standardlize dataset
        split data 
        '''
        data = pd.read_csv(opt.data_path, header=None).values.astype(float)  # -> np.ndarray
        
        len_train = opt.n_train * opt.day_slot  # 34 * 288  288 = 24 * 12
        len_val = opt.n_val * opt.day_slot  # 5 * 288

        if train:
            start = 0
        elif val:
            start = len_train
        else:
            start = len_train + len_val

        
        scaler = opt.scaler   # standardlize dataset

        if train:
            self.dataset = data[: len_train]    # [len_train, 228]
            self.dataset = scaler.fit_transform(self.dataset)
        elif val:
            self.dataset = data[len_train : len_train + len_val]
            self.dataset = scaler.transform(self.dataset)
        else:
            self.dataset = data[len_train + len_val : len_train + len_val + len_val]
            self.dataset = scaler.transform(self.dataset)

        self.dataset = torch.Tensor(self.dataset)   # ndarray -> tensor
        self.x, self.y = transform(self.dataset, train, opt, start)
       
       
    def __len__(self) -> int:
        '''
        return time slots the dataset have
        1 slot per 5 minutes
        12 slots per 1 hour
        '''
        return self.x.shape[0]    # self.dataset.shape = slots * routes = [slots, 228]

    def __getitem__(self, index: int) -> torch.Tensor:
        '''
        x || data: speed 1 hour ago
        y || label: speed 15 minutes later
        '''
        return self.x[index], self.y[index] # [1, 228, 14, 33], [1, 228, 4, 1]


class STAGNN_7_Dataset(torch.utils.data.Dataset):
    def __init__(self, opt: object, train: bool, val: bool) -> torch.Tensor:
        '''
        split data to Train/Val/Test dataset
        standardlize dataset
        split data 
        '''
        data = pd.read_csv(opt.data_path, header=None).values.astype(float)  # -> np.ndarray
        
        sub_label = np.load('/home/lyj_11921026/liuqinxian/IJCAI/STAGNN/data/PeMS/stable_pretext.npy')
        b, n, k = sub_label.shape
        sub_label = sub_label.reshape(-1, 2)
        enc = OneHotEncoder(sparse=False)
        sub_label = enc.fit_transform(sub_label)
        sub_label = sub_label.reshape(b, n, -1)
        
        
        len_train = opt.n_train * opt.day_slot  # 34 * 288  288 = 24 * 12
        len_val = opt.n_val * opt.day_slot  # 5 * 288

        if train:
            start = 0
        elif val:
            start = len_train
        else:
            start = len_train + len_val

        scaler = opt.scaler   # standardlize dataset

        if train:
            self.dataset = data[: len_train]    # [len_train, 228]
            self.dataset = scaler.fit_transform(self.dataset)
        elif val:
            self.dataset = data[len_train : len_train + len_val]
            self.dataset = scaler.transform(self.dataset)
        else:
            self.dataset = data[len_train + len_val : len_train + len_val + len_val]
            self.dataset = scaler.transform(self.dataset)

        self.dataset = torch.Tensor(self.dataset)   # ndarray -> tensor
        self.sub_label = torch.Tensor(sub_label)
        self.x, self.y, self.z = transform_7(self.dataset, train, opt, start, self.sub_label)

       
    def __len__(self) -> int:
        '''
        return time slots the dataset have
        1 slot per 5 minutes
        12 slots per 1 hour
        '''
        return self.x.shape[0]    # self.dataset.shape = slots * routes = [slots, 228]

    def __getitem__(self, index: int) -> torch.Tensor:
        '''
        x || data: speed 1 hour ago
        y || label: speed 15 minutes later
        '''
        return self.x[index], self.y[index], self.z[index] # [1, 228, 14, 33], [1, 228, 4, 1], [1, 228, ]

class STAGNN_stamp_Dataset(torch.utils.data.Dataset):
    def __init__(self, opt: object, train: bool, val: bool) -> torch.Tensor:
        '''
        split data to Train/Val/Test dataset
        standardlize dataset
        split data 
        '''
        data = pd.read_csv(opt.data_path, header=None).values.astype(float)  # -> np.ndarray
        
        sub_label = np.load(opt.stamp_path)
        # print(sub_label.shape)
        T = sub_label.shape
        # sub_label = sub_label.reshape(T, 1, 1)
        
        
        len_train = opt.n_train * opt.day_slot  # 34 * 288  288 = 24 * 12
        len_val = opt.n_val * opt.day_slot  # 5 * 288

        if train:
            start = 0
        elif val:
            start = len_train
        else:
            start = len_train + len_val

        scaler = opt.scaler   # standardlize dataset

        if train:
            self.dataset = data[: len_train]    # [len_train, 228]
            self.dataset = scaler.fit_transform(self.dataset)
        elif val:
            self.dataset = data[len_train : len_train + len_val]
            self.dataset = scaler.transform(self.dataset)
        else:
            self.dataset = data[len_train + len_val : len_train + len_val + len_val]
            self.dataset = scaler.transform(self.dataset)

        self.dataset = torch.Tensor(self.dataset)   # ndarray -> tensor
        self.sub_label = torch.Tensor(sub_label)
        self.x, self.stamp, self.y = transform_time(self.dataset, train, opt, start, self.sub_label)

       
    def __len__(self) -> int:
        '''
        return time slots the dataset have
        1 slot per 5 minutes
        12 slots per 1 hour
        '''
        return self.x.shape[0]    # self.dataset.shape = slots * routes = [slots, 228]

    def __getitem__(self, index: int) -> torch.Tensor:
        '''
        x || data: speed 1 hour ago
        y || label: speed 15 minutes later
        '''
        return self.x[index],  self.stamp[index],self.y[index], # [1, 228, 14, 33], [1, 228, 4, 1], [1, 228, ]

    
