# Supplementary material
Source: ML conference proceedings conference paper supplement (https://proceedings.neurips.cc/paper_files/paper/2022/hash/7b102c908e9404dd040599c65db4ce3e-Abstract.html)
Supplement: Supplementary file 1 [file 7b102c908e9404dd040599c65db4ce3e-Supplemental-Conference.zip › 663_multivariate_time_series_forec-Supplementary Material/code/data/PeMS/V_228.csv]

7.109999999999999432e+01	6.600000000000000000e+01	6.459999999999999432e+01	6.559999999999999432e+01	6.709999999999999432e+01	7.190000000000000568e+01	6.859999999999999432e+01	6.770000000000000284e+01	6.579999999999999716e+01	4.089999999999999858e+01	6.759999999999999432e+01	6.979999999999999716e+01	6.550000000000000000e+01	6.990000000000000568e+01	6.329999999999999716e+01	6.979999999999999716e+01	6.500000000000000000e+01	6.420000000000000284e+01	7.190000000000000568e+01	7.050000000000000000e+01	6.550000000000000000e+01	6.959999999999999432e+01	6.970000000000000284e+01	6.500000000000000000e+01	6.820000000000000284e+01	6.500000000000000000e+01	6.950000000000000000e+01	6.500000000000000000e+01	6.700000000000000000e+01	6.420000000000000284e+01	6.820000000000000284e+01	7.159999999999999432e+01	6.500000000000000000e+01	7.029999999999999716e+01	6.800000000000000000e+01	6.500000000000000000e+01	6.929999999999999716e+01	6.500000000000000000e+01	6.870000000000000284e+01	7.150000000000000000e+01	6.909999999999999432e+01	6.920000000000000284e+01	6.890000000000000568e+01	6.500000000000000000e+01	6.500000000000000000e+01	6.870000000000000284e+01	7.209999999999999432e+01	6.979999999999999716e+01	6.909999999999999432e+01	6.850000000000000000e+01
6.809999999999999432e+01	6.679999999999999716e+01	6.170000000000000284e+01	6.670000000000000284e+01	6.450000000000000000e+01	7.159999999999999432e+01	7.229999999999999716e+01	6.490000000000000568e+01	6.559999999999999432e+01	4.010000000000000142e+01	6.809999999999999432e+01	7.079999999999999716e+01	6.570000000000000284e+01	7.020000000000000284e+01	6.700000000000000000e+01	6.890000000000000568e+01	6.490000000000000568e+01	6.579999999999999716e+01	7.270000000000000284e+01	7.229999999999999716e+01	6.520000000000000284e+01	7.109999999999999432e+01	6.920000000000000284e+01	6.500000000000000000e+01	6.970000000000000284e+01	6.500000000000000000e+01	6.950000000000000000e+01	6.509999999999999432e+01	6.779999999999999716e+01	6.429999999999999716e+01	6.859999999999999432e+01	7.140000000000000568e+01	6.500000000000000000e+01	6.959999999999999432e+01	7.009999999999999432e+01	6.500000000000000000e+01	7.029999999999999716e+01	6.500000000000000000e+01	6.729999999999999716e+01	7.390000000000000568e+01	6.850000000000000000e+01	7.100000000000000000e+01	6.800000000000000000e+01	6.500000000000000000e+01	6.550000000000000000e+01	6.950000000000000000e+01	7.020000000000000284e+01	6.990000000000000568e+01	6.929999999999999716e+01	6.659999999999999432e+01
6.800000000000000000e+01	6.429999999999999716e+01	6.659999999999999432e+01	6.870000000000000284e+01	6.809999999999999432e+01	7.050000000000000000e+01	7.020000000000000284e+01	6.170000000000000284e+01	6.339999999999999858e+01	3.960000000000000142e+01	6.940000000000000568e+01	6.740000000000000568e+01	6.550000000000000000e+01	7.079999999999999716e+01	6.920000000000000284e+01	6.640000000000000568e+01	6.490000000000000568e+01	6.809999999999999432e+01	7.170000000000000284e+01	7.179999999999999716e+01	6.600000000000000000e+01	6.900000000000000000e+01	7.050000000000000000e+01	6.500000000000000000e+01	6.900000000000000000e+01	6.500000000000000000e+01	6.920000000000000284e+01	6.509999999999999432e+01	6.640000000000000568e+01	6.459999999999999432e+01	6.900000000000000000e+01	6.970000000000000284e+01	6.540000000000000568e+01	7.009999999999999432e+01	6.800000000000000000e+01	6.509999999999999432e+01	6.740000000000000568e+01	6.490000000000000568e+01	6.779999999999999716e+01	7.209999999999999432e+01	7.029999999999999716e+01	6.970000000000000284e+01	6.900000000000000000e+01	6.500000000000000000e+01	6.409999999999999432e+01	7.179999999999999716e+01	6.879999999999999716e+01	7.040000000000000568e+01	7.000000000000000000e+01	6.659999999999999432e+01
6.829999999999999716e+01	6.779999999999999716e+01	6.590000000000000568e+01	6.659999999999999432e+01	6.790000000000000568e+01	7.029999999999999716e+01	6.979999999999999716e+01	6.759999999999999432e+01	6.320000000000000284e+01	3.760000000000000142e+01	6.700000000000000000e+01	6.759999999999999432e+01	6.520000000000000284e+01	7.109999999999999432e+01	6.600000000000000000e+01	6.609999999999999432e+01	6.490000000000000568e+01	6.559999999999999432e+01	7.090000000000000568e+01	7.150000000000000000e+01	6.400000000000000000e+01	7.250000000000000000e+01	6.940000000000000568e+01	6.500000000000000000e+01	6.800000000000000000e+01	6.490000000000000568e+01	6.809999999999999432e+01	6.509999999999999432e+01	6.759999999999999432e+01	6.420000000000000284e+01	7.109999999999999432e+01	6.840000000000000568e+01	6.509999999999999432e+01	7.190000000000000568e+01	6.700000000000000000e+01	6.500000000000000000e+01	7.070000000000000284e+01	6.520000000000000284e+01	6.840000000000000568e+01	7.140000000000000568e+01	7.109999999999999432e+01	6.950000000000000000e+01	6.959999999999999432e+01	6.520000000000000284e+01	6.459999999999999432e+01	6.920000000000000284e+01	6.570000000000000284e+01	7.009999999999999432e+01	6.959999999999999432e+01	6.770000000000000284e+01
6.890000000000000568e+01	6.950000000000000000e+01	6.120000000000000284e+01	6.740000000000000568e+01	6.400000000000000000e+01	6.809999999999999432e+01	6.700000000000000000e+01	6.670000000000000284e+01	6.420000000000000284e+01	3.679999999999999716e+01	6.659999999999999432e+01	6.850000000000000000e+01	6.520000000000000284e+01	6.979999999999999716e+01	7.000000000000000000e+01	6.859999999999999432e+01	6.490000000000000568e+01	6.270000000000000284e+01	7.109999999999999432e+01	6.900000000000000000e+01	6.260000000000000142e+01	7.020000000000000284e+01	7.100000000000000000e+01	6.500000000000000000e+01	6.690000000000000568e+01	6.490000000000000568e+01	6.929999999999999716e+01	6.500000000000000000e+01	6.670000000000000284e+01	6.670000000000000284e+01	7.079999999999999716e+01	6.820000000000000284e+01	6.520000000000000284e+01	7.140000000000000568e+01	6.670000000000000284e+01	6.500000000000000000e+01	7.050000000000000000e+01	6.520000000000000284e+01	6.770000000000000284e+01	7.009999999999999432e+01	6.840000000000000568e+01	6.870000000000000284e+01	6.850000000000000000e+01	6.509999999999999432e+01	6.509999999999999432e+01	6.840000000000000568e+01	6.429999999999999716e+01	7.090000000000000568e+01	7.109999999999999432e+01	6.620000000000000284e+01
6.659999999999999432e+01	6.909999999999999432e+01	6.509999999999999432e+01	6.520000000000000284e+01	6.800000000000000000e+01	6.879999999999999716e+01	6.829999999999999716e+01	6.640000000000000568e+01	6.409999999999999432e+01	3.529999999999999716e+01	6.959999999999999432e+01	6.840000000000000568e+01	6.520000000000000284e+01	7.159999999999999432e+01	6.629999999999999716e+01	6.850000000000000000e+01	6.490000000000000568e+01	6.440000000000000568e+01	7.009999999999999432e+01	6.850000000000000000e+01	6.379999999999999716e+01	6.700000000000000000e+01	7.000000000000000000e+01	6.500000000000000000e+01	6.740000000000000568e+01	6.490000000000000568e+01	6.909999999999999432e+01	6.500000000000000000e+01	6.570000000000000284e+01	6.370000000000000284e+01	6.770000000000000284e+01	6.620000000000000284e+01	6.500000000000000000e+01	7.279999999999999716e+01	6.529999999999999716e+01	6.500000000000000000e+01	6.750000000000000000e+01	6.520000000000000284e+01	6.800000000000000000e+01	6.700000000000000000e+01	6.870000000000000284e+01	6.800000000000000000e+01	6.809999999999999432e+01	6.500000000000000000e+01	6.200000000000000000e+01	6.729999999999999716e+01	6.629999999999999716e+01	6.959999999999999432e+01	7.020000000000000284e+01	6.609999999999999432e+01
6.579999999999999716e+01	7.020000000000000284e+01	6.139999999999999858e+01	6.450000000000000000e+01	6.479999999999999716e+01	7.029999999999999716e+01	6.970000000000000284e+01	6.759999999999999432e+01	6.409999999999999432e+01	3.779999999999999716e+01	6.670000000000000284e+01	6.850000000000000000e+01	6.470000000000000284e+01	7.020000000000000284e+01	6.490000000000000568e+01	6.720000000000000284e+01	6.490000000000000568e+01	6.329999999999999716e+01	7.050000000000000000e+01	7.020000000000000284e+01	5.989999999999999858e+01	6.740000000000000568e+01	6.900000000000000000e+01	6.509999999999999432e+01	6.690000000000000568e+01	6.490000000000000568e+01	6.959999999999999432e+01	6.500000000000000000e+01	6.620000000000000284e+01	6.339999999999999858e+01	6.690000000000000568e+01	6.570000000000000284e+01	6.500000000000000000e+01	7.200000000000000000e+01	6.370000000000000284e+01	6.500000000000000000e+01	6.609999999999999432e+01	6.520000000000000284e+01	6.840000000000000568e+01	6.750000000000000000e+01	6.659999999999999432e+01	6.859999999999999432e+01	6.900000000000000000e+01	6.500000000000000000e+01	6.350000000000000000e+01	6.500000000000000000e+01	6.310000000000000142e+01	6.970000000000000284e+01	7.050000000000000000e+01	6.670000000000000284e+01
6.829999999999999716e+01	7.050000000000000000e+01	6.129999999999999716e+01	6.420000000000000284e+01	6.440000000000000568e+01	6.690000000000000568e+01	6.459999999999999432e+01	6.940000000000000568e+01	6.129999999999999716e+01	3.500000000000000000e+01	6.509999999999999432e+01	7.000000000000000000e+01	6.470000000000000284e+01	6.670000000000000284e+01	6.450000000000000000e+01	6.500000000000000000e+01	6.490000000000000568e+01	6.170000000000000284e+01	7.140000000000000568e+01	6.840000000000000568e+01	6.339999999999999858e+01	6.670000000000000284e+01	6.840000000000000568e+01	6.509999999999999432e+01	6.720000000000000284e+01	6.490000000000000568e+01	6.950000000000000000e+01	6.490000000000000568e+01	6.579999999999999716e+01	6.400000000000000000e+01	6.850000000000000000e+01	6.820000000000000284e+01	6.509999999999999432e+01	6.870000000000000284e+01	6.600000000000000000e+01	6.500000000000000000e+01	6.429999999999999716e+01	6.520000000000000284e+01	6.679999999999999716e+01	7.029999999999999716e+01	6.620000000000000284e+01	6.909999999999999432e+01	6.879999999999999716e+01	6.509999999999999432e+01	6.339999999999999858e+01	6.800000000000000000e+01	6.809999999999999432e+01	6.900000000000000000e+01	6.759999999999999432e+01	6.670000000000000284e+01
6.920000000000000284e+01	7.250000000000000000e+01	5.829999999999999716e+01	6.320000000000000284e+01	6.170000000000000284e+01	6.520000000000000284e+01	6.229999999999999716e+01	7.129999999999999716e+01	6.509999999999999432e+01	2.930000000000000071e+01	6.600000000000000000e+01	7.159999999999999432e+01	6.470000000000000284e+01	6.800000000000000000e+01	6.329999999999999716e+01	6.840000000000000568e+01	6.490000000000000568e+01	6.400000000000000000e+01	7.190000000000000568e+01	6.909999999999999432e+01	6.429999999999999716e+01	6.800000000000000000e+01	6.929999999999999716e+01	6.509999999999999432e+01	6.720000000000000284e+01	6.490000000000000568e+01	6.900000000000000000e+01	6.490000000000000568e+01	6.620000000000000284e+01	6.179999999999999716e+01	6.540000000000000568e+01	6.720000000000000284e+01	6.509999999999999432e+01	6.909999999999999432e+01	6.459999999999999432e+01	6.500000000000000000e+01	6.450000000000000000e+01	6.520000000000000284e+01	6.800000000000000000e+01	6.759999999999999432e+01	6.470000000000000284e+01	6.909999999999999432e+01	6.770000000000000284e+01	6.509999999999999432e+01	6.289999999999999858e+01	6.729999999999999716e+01	6.700000000000000000e+01	6.940000000000000568e+01	6.640000000000000568e+01	6.529999999999999716e+01
7.100000000000000000e+01	7.100000000000000000e+01	6.079999999999999716e+01	6.450000000000000000e+01	6.310000000000000142e+01	6.650000000000000000e+01	6.310000000000000142e+01	6.909999999999999432e+01	6.470000000000000284e+01	3.119999999999999929e+01	6.809999999999999432e+01	7.190000000000000568e+01	6.500000000000000000e+01	6.920000000000000284e+01	6.289999999999999858e+01	7.050000000000000000e+01	6.490000000000000568e+01	6.329999999999999716e+01	7.209999999999999432e+01	6.950000000000000000e+01	6.060000000000000142e+01	6.609999999999999432e+01	7.029999999999999716e+01	6.509999999999999432e+01	6.859999999999999432e+01	6.490000000000000568e+01	6.909999999999999432e+01	6.490000000000000568e+01	6.490000000000000568e+01	6.220000000000000284e+01	6.570000000000000284e+01	6.500000000000000000e+01	6.509999999999999432e+01	6.970000000000000284e+01	6.570000000000000284e+01	6.500000000000000000e+01	6.450000000000000000e+01	6.520000000000000284e+01	6.829999999999999716e+01	6.809999999999999432e+01	6.820000000000000284e+01	6.990000000000000568e+01	6.940000000000000568e+01	6.509999999999999432e+01	6.520000000000000284e+01	6.650000000000000000e+01	6.360000000000000142e+01	6.940000000000000568e+01	6.870000000000000284e+01	6.629999999999999716e+01
7.100000000000000000e+01	7.500000000000000000e+01	6.089999999999999858e+01	6.559999999999999432e+01	6.379999999999999716e+01	6.750000000000000000e+01	6.700000000000000000e+01	7.050000000000000000e+01	6.440000000000000568e+01	3.289999999999999858e+01	6.920000000000000284e+01	7.490000000000000568e+01	6.450000000000000000e+01	6.959999999999999432e+01	6.670000000000000284e+01	6.970000000000000284e+01	6.479999999999999716e+01	6.379999999999999716e+01	7.120000000000000284e+01	6.750000000000000000e+01	6.100000000000000000e+01	6.679999999999999716e+01	6.990000000000000568e+01	6.509999999999999432e+01	6.609999999999999432e+01	6.490000000000000568e+01	6.979999999999999716e+01	6.479999999999999716e+01	6.520000000000000284e+01	6.050000000000000000e+01	6.100000000000000000e+01	6.670000000000000284e+01	6.529999999999999716e+01	7.000000000000000000e+01	6.550000000000000000e+01	6.500000000000000000e+01	6.289999999999999858e+01	6.509999999999999432e+01	6.470000000000000284e+01	6.679999999999999716e+01	6.779999999999999716e+01	6.800000000000000000e+01	6.709999999999999432e+01	6.509999999999999432e+01	6.409999999999999432e+01	6.779999999999999716e+01	6.310000000000000142e+01	6.970000000000000284e+01	7.070000000000000284e+01	6.550000000000000000e+01
6.820000000000000284e+01	6.890000000000000568e+01	6.160000000000000142e+01	6.089999999999999858e+01	6.459999999999999432e+01	5.789999999999999858e+01	6.890000000000000568e+01	6.829999999999999716e+01	6.400000000000000000e+01	2.769999999999999929e+01	6.529999999999999716e+01	7.190000000000000568e+01	6.459999999999999432e+01	6.859999999999999432e+01	5.879999999999999716e+01	6.740000000000000568e+01	6.479999999999999716e+01	6.379999999999999716e+01	6.809999999999999432e+01	7.000000000000000000e+01	5.970000000000000284e+01	6.750000000000000000e+01	6.929999999999999716e+01	6.509999999999999432e+01	6.459999999999999432e+01	6.490000000000000568e+01	6.850000000000000000e+01	6.479999999999999716e+01	6.450000000000000000e+01	6.220000000000000284e+01	6.409999999999999432e+01	6.700000000000000000e+01	6.509999999999999432e+01	6.879999999999999716e+01	6.320000000000000284e+01	6.500000000000000000e+01	6.420000000000000284e+01	6.509999999999999432e+01	6.690000000000000568e+01	6.409999999999999432e+01	6.370000000000000284e+01	6.620000000000000284e+01	6.720000000000000284e+01	6.509999999999999432e+01	6.470000000000000284e+01	6.579999999999999716e+01	6.129999999999999716e+01	7.000000000000000000e+01	7.050000000000000000e+01	6.609999999999999432e+01
6.920000000000000284e+01	7.029999999999999716e+01	6.029999999999999716e+01	6.079999999999999716e+01	6.310000000000000142e+01	5.020000000000000284e+01	6.270000000000000284e+01	6.870000000000000284e+01	6.329999999999999716e+01	2.730000000000000071e+01	6.600000000000000000e+01	7.320000000000000284e+01	6.450000000000000000e+01	6.820000000000000284e+01	5.989999999999999858e+01	6.859999999999999432e+01	6.509999999999999432e+01	6.110000000000000142e+01	6.770000000000000284e+01	7.009999999999999432e+01	6.029999999999999716e+01	6.659999999999999432e+01	7.020000000000000284e+01	6.520000000000000284e+01	6.529999999999999716e+01	6.490000000000000568e+01	6.979999999999999716e+01	6.479999999999999716e+01	6.350000000000000000e+01	6.110000000000000142e+01	6.500000000000000000e+01	6.829999999999999716e+01	6.509999999999999432e+01	7.000000000000000000e+01	6.400000000000000000e+01	6.500000000000000000e+01	6.289999999999999858e+01	6.509999999999999432e+01	6.690000000000000568e+01	6.590000000000000568e+01	6.389999999999999858e+01	6.550000000000000000e+01	6.720000000000000284e+01	6.509999999999999432e+01	6.470000000000000284e+01	6.579999999999999716e+01	6.089999999999999858e+01	7.070000000000000284e+01	7.140000000000000568e+01	6.670000000000000284e+01
6.900000000000000000e+01	7.190000000000000568e+01	6.010000000000000142e+01	6.270000000000000284e+01	6.289999999999999858e+01	5.370000000000000284e+01	5.739999999999999858e+01	6.940000000000000568e+01	6.440000000000000568e+01	2.750000000000000000e+01	6.800000000000000000e+01	7.529999999999999716e+01	6.500000000000000000e+01	6.700000000000000000e+01	6.350000000000000000e+01	6.940000000000000568e+01	6.520000000000000284e+01	6.389999999999999858e+01	7.000000000000000000e+01	6.879999999999999716e+01	6.070000000000000284e+01	6.590000000000000568e+01	6.720000000000000284e+01	6.529999999999999716e+01	6.729999999999999716e+01	6.490000000000000568e+01	6.870000000000000284e+01	6.479999999999999716e+01	6.550000000000000000e+01	6.079999999999999716e+01	6.179999999999999716e+01	6.840000000000000568e+01	6.520000000000000284e+01	6.929999999999999716e+01	6.570000000000000284e+01	6.500000000000000000e+01	6.409999999999999432e+01	6.509999999999999432e+01	6.629999999999999716e+01	7.120000000000000284e+01	6.540000000000000568e+01	6.759999999999999432e+01	6.879999999999999716e+01	6.509999999999999432e+01	6.490000000000000568e+01	6.609999999999999432e+01	6.120000000000000284e+01	6.970000000000000284e+01	6.879999999999999716e+01	6.679999999999999716e+01
7.140000000000000568e+01	7.359999999999999432e+01	6.200000000000000000e+01	6.350000000000000000e+01	6.440000000000000568e+01	6.220000000000000284e+01	6.609999999999999432e+01	7.229999999999999716e+01	6.400000000000000000e+01	3.030000000000000071e+01	6.790000000000000568e+01	7.200000000000000000e+01	6.500000000000000000e+01	6.759999999999999432e+01	6.289999999999999858e+01	6.879999999999999716e+01	6.529999999999999716e+01	6.329999999999999716e+01	7.059999999999999432e+01	6.859999999999999432e+01	6.550000000000000000e+01	6.579999999999999716e+01	6.959999999999999432e+01	6.550000000000000000e+01	6.800000000000000000e+01	6.490000000000000568e+01	6.909999999999999432e+01	6.470000000000000284e+01	6.389999999999999858e+01	5.879999999999999716e+01	6.370000000000000284e+01	7.009999999999999432e+01	6.520000000000000284e+01	7.029999999999999716e+01	6.820000000000000284e+01	6.500000000000000000e+01	6.289999999999999858e+01	6.509999999999999432e+01	6.779999999999999716e+01	7.009999999999999432e+01	6.850000000000000000e+01	6.820000000000000284e+01	6.779999999999999716e+01	6.500000000000000000e+01	6.450000000000000000e+01	6.590000000000000568e+01	6.620000000000000284e+01	7.029999999999999716e+01	7.050000000000000000e+01	6.720000000000000284e+01
7.040000000000000568e+01	7.059999999999999432e+01	6.220000000000000284e+01	6.020000000000000284e+01	6.450000000000000000e+01	6.579999999999999716e+01	6.500000000000000000e+01	6.879999999999999716e+01	6.440000000000000568e+01	2.989999999999999858e+01	6.670000000000000284e+01	7.309999999999999432e+01	6.479999999999999716e+01	6.850000000000000000e+01	5.939999999999999858e+01	6.970000000000000284e+01	6.509999999999999432e+01	6.350000000000000000e+01	7.079999999999999716e+01	7.070000000000000284e+01	6.490000000000000568e+01	6.809999999999999432e+01	6.870000000000000284e+01	6.550000000000000000e+01	6.590000000000000568e+01	6.490000000000000568e+01	6.890000000000000568e+01	6.470000000000000284e+01	6.559999999999999432e+01	6.320000000000000284e+01	6.729999999999999716e+01	7.070000000000000284e+01	6.520000000000000284e+01	7.070000000000000284e+01	6.720000000000000284e+01	6.500000000000000000e+01	6.470000000000000284e+01	6.509999999999999432e+01	6.850000000000000000e+01	7.170000000000000284e+01	6.950000000000000000e+01	6.759999999999999432e+01	6.879999999999999716e+01	6.500000000000000000e+01	6.429999999999999716e+01	6.540000000000000568e+01	6.970000000000000284e+01	7.059999999999999432e+01	6.950000000000000000e+01	6.709999999999999432e+01
7.120000000000000284e+01	6.759999999999999432e+01	5.789999999999999858e+01	6.300000000000000000e+01	6.129999999999999716e+01	6.709999999999999432e+01	6.650000000000000000e+01	6.559999999999999432e+01	6.260000000000000142e+01	2.780000000000000071e+01	7.179999999999999716e+01	6.879999999999999716e+01	6.490000000000000568e+01	6.879999999999999716e+01	6.200000000000000000e+01	6.659999999999999432e+01	6.520000000000000284e+01	6.379999999999999716e+01	7.040000000000000568e+01	6.970000000000000284e+01	6.310000000000000142e+01	6.929999999999999716e+01	6.770000000000000284e+01	6.550000000000000000e+01	6.709999999999999432e+01	6.490000000000000568e+01	6.900000000000000000e+01	6.470000000000000284e+01	6.609999999999999432e+01	6.260000000000000142e+01	6.629999999999999716e+01	6.640000000000000568e+01	6.520000000000000284e+01	7.029999999999999716e+01	6.500000000000000000e+01	6.509999999999999432e+01	6.679999999999999716e+01	6.509999999999999432e+01	6.770000000000000284e+01	6.759999999999999432e+01	6.920000000000000284e+01	6.840000000000000568e+01	6.709999999999999432e+01	6.500000000000000000e+01	6.450000000000000000e+01	6.600000000000000000e+01	6.629999999999999716e+01	6.990000000000000568e+01	6.940000000000000568e+01	6.800000000000000000e+01
7.059999999999999432e+01	7.340000000000000568e+01	6.100000000000000000e+01	6.300000000000000000e+01	6.339999999999999858e+01	6.959999999999999432e+01	6.970000000000000284e+01	6.870000000000000284e+01	6.289999999999999858e+01	2.539999999999999858e+01	6.440000000000000568e+01	7.150000000000000000e+01	6.490000000000000568e+01	6.900000000000000000e+01	6.210000000000000142e+01	6.709999999999999432e+01	6.520000000000000284e+01	6.379999999999999716e+01	7.100000000000000000e+01	6.940000000000000568e+01	6.150000000000000000e+01	6.779999999999999716e+01	6.959999999999999432e+01	6.550000000000000000e+01	6.800000000000000000e+01	6.490000000000000568e+01	6.890000000000000568e+01	6.470000000000000284e+01	6.579999999999999716e+01	6.279999999999999716e+01	6.679999999999999716e+01	6.650000000000000000e+01	6.500000000000000000e+01	7.009999999999999432e+01	6.459999999999999432e+01	6.500000000000000000e+01	6.650000000000000000e+01	6.509999999999999432e+01	6.859999999999999432e+01	6.800000000000000000e+01	6.879999999999999716e+01	6.879999999999999716e+01	6.679999999999999716e+01	6.509999999999999432e+01	6.429999999999999716e+01	6.640000000000000568e+01	6.339999999999999858e+01	7.059999999999999432e+01	7.050000000000000000e+01	6.700000000000000000e+01
7.220000000000000284e+01	7.190000000000000568e+01	5.889999999999999858e+01	6.529999999999999716e+01	6.200000000000000000e+01	6.559999999999999432e+01	6.370000000000000284e+01	6.779999999999999716e+01	6.420000000000000284e+01	2.689999999999999858e+01	6.150000000000000000e+01	7.229999999999999716e+01	6.470000000000000284e+01	6.650000000000000000e+01	6.550000000000000000e+01	6.759999999999999432e+01	6.520000000000000284e+01	6.300000000000000000e+01	7.150000000000000000e+01	6.759999999999999432e+01	6.400000000000000000e+01	6.890000000000000568e+01	6.759999999999999432e+01	6.550000000000000000e+01	6.779999999999999716e+01	6.490000000000000568e+01	6.829999999999999716e+01	6.500000000000000000e+01	6.609999999999999432e+01	6.189999999999999858e+01	6.520000000000000284e+01	6.550000000000000000e+01	6.500000000000000000e+01	6.929999999999999716e+01	6.329999999999999716e+01	6.500000000000000000e+01	6.629999999999999716e+01	6.509999999999999432e+01	6.600000000000000000e+01	6.890000000000000568e+01	7.090000000000000568e+01	6.840000000000000568e+01	6.820000000000000284e+01	6.509999999999999432e+01	6.329999999999999716e+01	6.809999999999999432e+01	6.690000000000000568e+01	6.920000000000000284e+01	6.679999999999999716e+01	6.609999999999999432e+01
7.079999999999999716e+01	7.490000000000000568e+01	6.750000000000000000e+01	6.720000000000000284e+01	6.829999999999999716e+01	6.729999999999999716e+01	6.729999999999999716e+01	6.850000000000000000e+01	6.459999999999999432e+01	3.019999999999999929e+01	6.310000000000000142e+01	7.650000000000000000e+01	6.479999999999999716e+01	6.509999999999999432e+01	6.670000000000000284e+01	6.920000000000000284e+01	6.500000000000000000e+01	6.329999999999999716e+01	6.790000000000000568e+01	6.870000000000000284e+01	6.379999999999999716e+01	7.059999999999999432e+01	6.770000000000000284e+01	6.550000000000000000e+01	6.629999999999999716e+01	6.490000000000000568e+01	6.929999999999999716e+01	6.490000000000000568e+01	6.850000000000000000e+01	6.389999999999999858e+01	6.900000000000000000e+01	6.659999999999999432e+01	6.500000000000000000e+01	6.970000000000000284e+01	6.529999999999999716e+01	6.500000000000000000e+01	6.940000000000000568e+01	6.509999999999999432e+01	6.729999999999999716e+01	6.770000000000000284e+01	7.179999999999999716e+01	6.720000000000000284e+01	6.659999999999999432e+01	6.509999999999999432e+01	6.400000000000000000e+01	6.720000000000000284e+01	6.579999999999999716e+01	7.000000000000000000e+01	7.000000000000000000e+01	6.540000000000000568e+01
6.929999999999999716e+01	7.290000000000000568e+01	6.590000000000000568e+01	6.450000000000000000e+01	6.840000000000000568e+01	6.550000000000000000e+01	6.500000000000000000e+01	7.150000000000000000e+01	6.420000000000000284e+01	2.869999999999999929e+01	6.409999999999999432e+01	7.740000000000000568e+01	6.459999999999999432e+01	6.759999999999999432e+01	6.389999999999999858e+01	6.840000000000000568e+01	6.500000000000000000e+01	6.310000000000000142e+01	6.920000000000000284e+01	7.000000000000000000e+01	6.420000000000000284e+01	6.970000000000000284e+01	6.859999999999999432e+01	6.550000000000000000e+01	6.590000000000000568e+01	6.490000000000000568e+01	6.909999999999999432e+01	6.470000000000000284e+01	6.679999999999999716e+01	6.409999999999999432e+01	6.720000000000000284e+01	6.859999999999999432e+01	6.500000000000000000e+01	6.840000000000000568e+01	6.640000000000000568e+01	6.500000000000000000e+01	6.920000000000000284e+01	6.509999999999999432e+01	6.740000000000000568e+01	6.790000000000000568e+01	6.790000000000000568e+01	6.670000000000000284e+01	6.729999999999999716e+01	6.389999999999999858e+01	6.429999999999999716e+01	6.679999999999999716e+01	6.729999999999999716e+01	7.009999999999999432e+01	6.959999999999999432e+01	6.679999999999999716e+01
7.150000000000000000e+01	7.159999999999999432e+01	6.640000000000000568e+01	6.590000000000000568e+01	6.829999999999999716e+01	6.629999999999999716e+01	6.629999999999999716e+01	6.670000000000000284e+01	6.370000000000000284e+01	2.810000000000000142e+01	6.590000000000000568e+01	7.279999999999999716e+01	6.440000000000000568e+01	6.790000000000000568e+01	6.550000000000000000e+01	6.870000000000000284e+01	6.520000000000000284e+01	6.389999999999999858e+01	7.029999999999999716e+01	6.940000000000000568e+01	6.250000000000000000e+01	6.909999999999999432e+01	6.920000000000000284e+01	6.550000000000000000e+01	6.550000000000000000e+01	6.490000000000000568e+01	6.879999999999999716e+01	6.459999999999999432e+01	6.579999999999999716e+01	6.379999999999999716e+01	6.540000000000000568e+01	6.720000000000000284e+01	6.500000000000000000e+01	6.940000000000000568e+01	6.450000000000000000e+01	6.500000000000000000e+01	6.600000000000000000e+01	6.509999999999999432e+01	6.840000000000000568e+01	6.720000000000000284e+01	6.940000000000000568e+01	6.659999999999999432e+01	6.629999999999999716e+01	6.389999999999999858e+01	6.470000000000000284e+01	6.659999999999999432e+01	6.540000000000000568e+01	7.000000000000000000e+01	6.900000000000000000e+01	6.590000000000000568e+01
6.840000000000000568e+01	6.990000000000000568e+01	6.529999999999999716e+01	6.500000000000000000e+01	6.700000000000000000e+01	6.440000000000000568e+01	6.459999999999999432e+01	6.679999999999999716e+01	6.389999999999999858e+01	2.889999999999999858e+01	6.459999999999999432e+01	7.009999999999999432e+01	6.440000000000000568e+01	6.779999999999999716e+01	6.339999999999999858e+01	6.729999999999999716e+01	6.509999999999999432e+01	6.360000000000000142e+01	7.040000000000000568e+01	6.950000000000000000e+01	6.370000000000000284e+01	6.920000000000000284e+01	6.909999999999999432e+01	6.550000000000000000e+01	6.659999999999999432e+01	6.490000000000000568e+01	6.900000000000000000e+01	6.459999999999999432e+01	6.570000000000000284e+01	6.270000000000000284e+01	6.360000000000000142e+01	6.709999999999999432e+01	6.490000000000000568e+01	7.029999999999999716e+01	6.470000000000000284e+01	6.500000000000000000e+01	6.559999999999999432e+01	6.490000000000000568e+01	6.870000000000000284e+01	6.990000000000000568e+01	6.850000000000000000e+01	6.740000000000000568e+01	6.600000000000000000e+01	6.429999999999999716e+01	6.260000000000000142e+01	6.579999999999999716e+01	6.600000000000000000e+01	7.029999999999999716e+01	6.890000000000000568e+01	6.670000000000000284e+01
6.659999999999999432e+01	7.200000000000000000e+01	6.070000000000000284e+01	6.270000000000000284e+01	6.360000000000000142e+01	6.520000000000000284e+01	6.350000000000000000e+01	6.770000000000000284e+01	6.279999999999999716e+01	2.650000000000000000e+01	6.609999999999999432e+01	6.950000000000000000e+01	6.459999999999999432e+01	6.609999999999999432e+01	6.050000000000000000e+01	6.709999999999999432e+01	6.500000000000000000e+01	6.270000000000000284e+01	7.079999999999999716e+01	7.020000000000000284e+01	6.600000000000000000e+01	6.809999999999999432e+01	6.890000000000000568e+01	6.420000000000000284e+01	6.650000000000000000e+01	6.490000000000000568e+01	6.940000000000000568e+01	6.470000000000000284e+01	6.500000000000000000e+01	6.350000000000000000e+01	6.559999999999999432e+01	7.079999999999999716e+01	6.490000000000000568e+01	7.029999999999999716e+01	6.740000000000000568e+01	6.500000000000000000e+01	6.590000000000000568e+01	6.490000000000000568e+01	6.900000000000000000e+01	6.759999999999999432e+01	6.429999999999999716e+01	6.790000000000000568e+01	6.740000000000000568e+01	6.459999999999999432e+01	6.329999999999999716e+01	6.659999999999999432e+01	6.950000000000000000e+01	6.990000000000000568e+01	7.070000000000000284e+01	6.690000000000000568e+01
6.579999999999999716e+01	6.779999999999999716e+01	6.160000000000000142e+01	6.220000000000000284e+01	6.570000000000000284e+01	6.559999999999999432e+01	6.429999999999999716e+01	6.279999999999999716e+01	6.200000000000000000e+01	2.869999999999999929e+01	6.459999999999999432e+01	7.059999999999999432e+01	6.470000000000000284e+01	6.470000000000000284e+01	5.929999999999999716e+01	6.629999999999999716e+01	6.490000000000000568e+01	6.370000000000000284e+01	7.179999999999999716e+01	6.990000000000000568e+01	6.270000000000000284e+01	6.720000000000000284e+01	6.950000000000000000e+01	6.420000000000000284e+01	6.659999999999999432e+01	6.490000000000000568e+01	6.890000000000000568e+01	6.470000000000000284e+01	6.450000000000000000e+01	6.320000000000000284e+01	6.550000000000000000e+01	6.850000000000000000e+01	6.490000000000000568e+01	7.020000000000000284e+01	6.479999999999999716e+01	6.500000000000000000e+01	6.170000000000000284e+01	6.490000000000000568e+01	6.859999999999999432e+01	6.740000000000000568e+01	6.339999999999999858e+01	6.629999999999999716e+01	6.800000000000000000e+01	6.459999999999999432e+01	6.509999999999999432e+01	6.529999999999999716e+01	6.429999999999999716e+01	7.079999999999999716e+01	7.059999999999999432e+01	6.550000000000000000e+01
6.429999999999999716e+01	6.840000000000000568e+01	6.089999999999999858e+01	6.200000000000000000e+01	6.360000000000000142e+01	6.559999999999999432e+01	6.350000000000000000e+01	6.570000000000000284e+01	6.320000000000000284e+01	3.660000000000000142e+01	6.470000000000000284e+01	6.740000000000000568e+01	6.450000000000000000e+01	6.690000000000000568e+01	5.910000000000000142e+01	6.479999999999999716e+01	6.490000000000000568e+01	6.270000000000000284e+01	7.159999999999999432e+01	6.809999999999999432e+01	6.210000000000000142e+01	6.339999999999999858e+01	6.850000000000000000e+01	6.420000000000000284e+01	6.729999999999999716e+01	6.490000000000000568e+01	6.959999999999999432e+01	6.470000000000000284e+01	6.500000000000000000e+01	6.239999999999999858e+01	6.409999999999999432e+01	6.790000000000000568e+01	6.490000000000000568e+01	7.150000000000000000e+01	6.389999999999999858e+01	6.500000000000000000e+01	5.110000000000000142e+01	6.490000000000000568e+01	6.920000000000000284e+01	6.940000000000000568e+01	6.210000000000000142e+01	6.859999999999999432e+01	6.679999999999999716e+01	6.459999999999999432e+01	6.000000000000000000e+01	6.609999999999999432e+01	6.579999999999999716e+01	7.040000000000000568e+01	6.970000000000000284e+01	6.659999999999999432e+01
6.759999999999999432e+01	6.740000000000000568e+01	5.960000000000000142e+01	6.360000000000000142e+01	6.229999999999999716e+01	6.720000000000000284e+01	6.479999999999999716e+01	6.590000000000000568e+01	6.440000000000000568e+01	3.410000000000000142e+01	6.409999999999999432e+01	6.890000000000000568e+01	6.470000000000000284e+01	6.579999999999999716e+01	5.850000000000000000e+01	6.540000000000000568e+01	6.490000000000000568e+01	6.310000000000000142e+01	7.179999999999999716e+01	6.579999999999999716e+01	6.239999999999999858e+01	6.310000000000000142e+01	6.759999999999999432e+01	6.479999999999999716e+01	6.740000000000000568e+01	6.490000000000000568e+01	6.890000000000000568e+01	6.470000000000000284e+01	6.470000000000000284e+01	6.100000000000000000e+01	6.020000000000000284e+01	6.650000000000000000e+01	6.479999999999999716e+01	7.020000000000000284e+01	6.270000000000000284e+01	6.500000000000000000e+01	5.510000000000000142e+01	6.490000000000000568e+01	6.829999999999999716e+01	6.940000000000000568e+01	6.440000000000000568e+01	6.820000000000000284e+01	6.679999999999999716e+01	6.459999999999999432e+01	6.320000000000000284e+01	6.600000000000000000e+01	6.450000000000000000e+01	7.040000000000000568e+01	6.970000000000000284e+01	6.729999999999999716e+01
6.740000000000000568e+01	6.809999999999999432e+01	5.850000000000000000e+01	6.189999999999999858e+01	6.139999999999999858e+01	6.470000000000000284e+01	6.189999999999999858e+01	6.509999999999999432e+01	6.420000000000000284e+01	3.610000000000000142e+01	6.370000000000000284e+01	6.890000000000000568e+01	6.479999999999999716e+01	6.729999999999999716e+01	5.860000000000000142e+01	6.590000000000000568e+01	6.490000000000000568e+01	6.339999999999999858e+01	7.100000000000000000e+01	6.729999999999999716e+01	6.459999999999999432e+01	6.620000000000000284e+01	6.909999999999999432e+01	6.479999999999999716e+01	6.679999999999999716e+01	6.490000000000000568e+01	6.929999999999999716e+01	6.470000000000000284e+01	6.659999999999999432e+01	5.600000000000000000e+01	6.210000000000000142e+01	6.770000000000000284e+01	6.479999999999999716e+01	7.029999999999999716e+01	6.420000000000000284e+01	6.500000000000000000e+01	5.620000000000000284e+01	6.490000000000000568e+01	6.790000000000000568e+01	6.770000000000000284e+01	6.609999999999999432e+01	6.820000000000000284e+01	6.820000000000000284e+01	6.459999999999999432e+01	6.120000000000000284e+01	6.720000000000000284e+01	6.820000000000000284e+01	7.129999999999999716e+01	6.990000000000000568e+01	6.709999999999999432e+01
6.900000000000000000e+01	6.600000000000000000e+01	5.579999999999999716e+01	6.120000000000000284e+01	5.889999999999999858e+01	6.550000000000000000e+01	6.360000000000000142e+01	6.350000000000000000e+01	6.400000000000000000e+01	3.760000000000000142e+01	6.609999999999999432e+01	6.759999999999999432e+01	6.479999999999999716e+01	6.840000000000000568e+01	6.010000000000000142e+01	6.570000000000000284e+01	6.520000000000000284e+01	6.220000000000000284e+01	7.070000000000000284e+01	6.820000000000000284e+01	6.260000000000000142e+01	6.629999999999999716e+01	6.890000000000000568e+01	6.479999999999999716e+01	6.740000000000000568e+01	6.490000000000000568e+01	6.920000000000000284e+01	6.470000000000000284e+01	6.690000000000000568e+01	6.000000000000000000e+01	6.310000000000000142e+01	6.670000000000000284e+01	6.479999999999999716e+01	6.990000000000000568e+01	6.450000000000000000e+01	6.500000000000000000e+01	5.879999999999999716e+01	6.490000000000000568e+01	6.550000000000000000e+01	6.609999999999999432e+01	6.260000000000000142e+01	6.779999999999999716e+01	6.770000000000000284e+01	6.459999999999999432e+01	6.210000000000000142e+01	6.659999999999999432e+01	6.509999999999999432e+01	7.050000000000000000e+01	6.779999999999999716e+01	6.670000000000000284e+01
6.879999999999999716e+01	6.920000000000000284e+01	5.970000000000000284e+01	6.179999999999999716e+01	6.300000000000000000e+01	6.540000000000000568e+01	6.459999999999999432e+01	6.740000000000000568e+01	6.440000000000000568e+01	4.579999999999999716e+01	6.550000000000000000e+01	6.870000000000000284e+01	6.470000000000000284e+01	6.800000000000000000e+01	5.950000000000000000e+01	6.740000000000000568e+01	6.520000000000000284e+01	6.220000000000000284e+01	7.009999999999999432e+01	6.920000000000000284e+01	6.220000000000000284e+01	6.509999999999999432e+01	6.879999999999999716e+01	6.479999999999999716e+01	6.809999999999999432e+01	6.490000000000000568e+01	6.879999999999999716e+01	6.470000000000000284e+01	6.609999999999999432e+01	6.100000000000000000e+01	6.210000000000000142e+01	6.790000000000000568e+01	6.479999999999999716e+01	7.009999999999999432e+01	6.559999999999999432e+01	6.500000000000000000e+01	6.100000000000000000e+01	6.490000000000000568e+01	6.709999999999999432e+01	6.950000000000000000e+01	6.490000000000000568e+01	6.790000000000000568e+01	6.670000000000000284e+01	6.459999999999999432e+01	6.370000000000000284e+01	6.529999999999999716e+01	6.429999999999999716e+01	7.000000000000000000e+01	6.829999999999999716e+01	6.790000000000000568e+01
6.770000000000000284e+01	6.959999999999999432e+01	6.189999999999999858e+01	6.440000000000000568e+01	6.450000000000000000e+01	6.720000000000000284e+01	6.520000000000000284e+01	6.600000000000000000e+01	6.479999999999999716e+01	3.279999999999999716e+01	6.750000000000000000e+01	7.100000000000000000e+01	6.479999999999999716e+01	6.540000000000000568e+01	6.420000000000000284e+01	6.929999999999999716e+01	6.509999999999999432e+01	6.409999999999999432e+01	7.129999999999999716e+01	6.859999999999999432e+01	6.279999999999999716e+01	6.729999999999999716e+01	6.940000000000000568e+01	6.479999999999999716e+01	6.790000000000000568e+01	6.490000000000000568e+01	6.990000000000000568e+01	6.470000000000000284e+01	6.670000000000000284e+01	6.300000000000000000e+01	6.150000000000000000e+01	6.690000000000000568e+01	6.479999999999999716e+01	7.059999999999999432e+01	6.459999999999999432e+01	6.500000000000000000e+01	6.320000000000000284e+01	6.490000000000000568e+01	6.879999999999999716e+01	6.909999999999999432e+01	6.629999999999999716e+01	6.840000000000000568e+01	6.570000000000000284e+01	6.459999999999999432e+01	6.440000000000000568e+01	6.650000000000000000e+01	6.490000000000000568e+01	7.100000000000000000e+01	6.890000000000000568e+01	6.600000000000000000e+01
6.890000000000000568e+01	6.620000000000000284e+01	5.979999999999999716e+01	6.550000000000000000e+01	6.300000000000000000e+01	6.950000000000000000e+01	7.190000000000000568e+01	6.420000000000000284e+01	6.389999999999999858e+01	3.750000000000000000e+01	6.740000000000000568e+01	6.750000000000000000e+01	6.470000000000000284e+01	6.720000000000000284e+01	6.389999999999999858e+01	6.600000000000000000e+01	6.509999999999999432e+01	6.409999999999999432e+01	7.159999999999999432e+01	7.029999999999999716e+01	6.079999999999999716e+01	6.670000000000000284e+01	6.940000000000000568e+01	6.479999999999999716e+01	6.709999999999999432e+01	6.490000000000000568e+01	6.950000000000000000e+01	6.470000000000000284e+01	6.659999999999999432e+01	6.329999999999999716e+01	6.640000000000000568e+01	6.670000000000000284e+01	6.479999999999999716e+01	7.050000000000000000e+01	6.239999999999999858e+01	6.500000000000000000e+01	6.360000000000000142e+01	6.490000000000000568e+01	6.870000000000000284e+01	6.670000000000000284e+01	6.659999999999999432e+01	6.829999999999999716e+01	6.700000000000000000e+01	6.459999999999999432e+01	6.479999999999999716e+01	6.770000000000000284e+01	6.220000000000000284e+01	7.090000000000000568e+01	6.890000000000000568e+01	6.709999999999999432e+01
6.940000000000000568e+01	6.759999999999999432e+01	6.220000000000000284e+01	6.459999999999999432e+01	6.420000000000000284e+01	7.059999999999999432e+01	7.179999999999999716e+01	6.540000000000000568e+01	6.370000000000000284e+01	3.620000000000000284e+01	6.670000000000000284e+01	6.970000000000000284e+01	6.459999999999999432e+01	6.890000000000000568e+01	6.389999999999999858e+01	6.740000000000000568e+01	6.509999999999999432e+01	5.989999999999999858e+01	7.040000000000000568e+01	6.620000000000000284e+01	6.110000000000000142e+01	6.859999999999999432e+01	6.829999999999999716e+01	6.520000000000000284e+01	6.670000000000000284e+01	6.490000000000000568e+01	6.829999999999999716e+01	6.470000000000000284e+01	6.809999999999999432e+01	6.250000000000000000e+01	6.620000000000000284e+01	6.629999999999999716e+01	6.490000000000000568e+01	6.909999999999999432e+01	6.360000000000000142e+01	6.509999999999999432e+01	6.440000000000000568e+01	6.490000000000000568e+01	6.629999999999999716e+01	6.609999999999999432e+01	6.500000000000000000e+01	6.829999999999999716e+01	6.659999999999999432e+01	6.459999999999999432e+01	6.339999999999999858e+01	6.840000000000000568e+01	6.360000000000000142e+01	6.909999999999999432e+01	6.820000000000000284e+01	6.600000000000000000e+01
6.840000000000000568e+01	6.700000000000000000e+01	6.110000000000000142e+01	6.400000000000000000e+01	6.350000000000000000e+01	6.850000000000000000e+01	6.579999999999999716e+01	6.540000000000000568e+01	6.420000000000000284e+01	2.880000000000000071e+01	6.559999999999999432e+01	6.950000000000000000e+01	6.459999999999999432e+01	6.700000000000000000e+01	6.490000000000000568e+01	6.700000000000000000e+01	6.509999999999999432e+01	6.079999999999999716e+01	7.020000000000000284e+01	6.779999999999999716e+01	6.270000000000000284e+01	6.829999999999999716e+01	7.040000000000000568e+01	6.520000000000000284e+01	6.650000000000000000e+01	6.490000000000000568e+01	6.859999999999999432e+01	6.470000000000000284e+01	6.590000000000000568e+01	6.070000000000000284e+01	6.540000000000000568e+01	6.809999999999999432e+01	6.490000000000000568e+01	6.909999999999999432e+01	6.629999999999999716e+01	6.500000000000000000e+01	6.160000000000000142e+01	6.490000000000000568e+01	6.820000000000000284e+01	6.940000000000000568e+01	6.859999999999999432e+01	6.750000000000000000e+01	6.659999999999999432e+01	6.459999999999999432e+01	5.950000000000000000e+01	6.700000000000000000e+01	6.509999999999999432e+01	7.100000000000000000e+01	6.979999999999999716e+01	6.700000000000000000e+01
7.009999999999999432e+01	6.959999999999999432e+01	6.189999999999999858e+01	6.320000000000000284e+01	6.440000000000000568e+01	6.950000000000000000e+01	6.709999999999999432e+01	6.670000000000000284e+01	6.260000000000000142e+01	2.900000000000000000e+01	6.679999999999999716e+01	6.959999999999999432e+01	6.470000000000000284e+01	6.429999999999999716e+01	6.160000000000000142e+01	6.479999999999999716e+01	6.529999999999999716e+01	6.289999999999999858e+01	6.940000000000000568e+01	6.840000000000000568e+01	6.509999999999999432e+01	6.809999999999999432e+01	6.750000000000000000e+01	6.520000000000000284e+01	6.600000000000000000e+01	6.490000000000000568e+01	6.879999999999999716e+01	6.470000000000000284e+01	6.670000000000000284e+01	6.039999999999999858e+01	6.329999999999999716e+01	6.690000000000000568e+01	6.490000000000000568e+01	6.829999999999999716e+01	6.550000000000000000e+01	6.500000000000000000e+01	6.559999999999999432e+01	6.490000000000000568e+01	6.670000000000000284e+01	6.879999999999999716e+01	6.879999999999999716e+01	6.679999999999999716e+01	6.620000000000000284e+01	6.459999999999999432e+01	6.239999999999999858e+01	6.850000000000000000e+01	6.679999999999999716e+01	6.900000000000000000e+01	6.609999999999999432e+01	6.779999999999999716e+01
7.029999999999999716e+01	6.890000000000000568e+01	6.060000000000000142e+01	6.339999999999999858e+01	6.370000000000000284e+01	6.540000000000000568e+01	6.300000000000000000e+01	6.550000000000000000e+01	6.370000000000000284e+01	3.010000000000000142e+01	6.500000000000000000e+01	6.890000000000000568e+01	6.459999999999999432e+01	6.700000000000000000e+01	6.100000000000000000e+01	6.400000000000000000e+01	6.509999999999999432e+01	6.490000000000000568e+01	7.029999999999999716e+01	6.979999999999999716e+01	6.189999999999999858e+01	6.829999999999999716e+01	6.659999999999999432e+01	6.520000000000000284e+01	6.750000000000000000e+01	6.490000000000000568e+01	6.720000000000000284e+01	6.470000000000000284e+01	6.620000000000000284e+01	6.320000000000000284e+01	6.339999999999999858e+01	6.779999999999999716e+01	6.490000000000000568e+01	6.879999999999999716e+01	6.229999999999999716e+01	6.500000000000000000e+01	6.629999999999999716e+01	6.490000000000000568e+01	6.740000000000000568e+01	6.820000000000000284e+01	6.579999999999999716e+01	6.750000000000000000e+01	6.620000000000000284e+01	6.459999999999999432e+01	6.420000000000000284e+01	6.709999999999999432e+01	6.210000000000000142e+01	6.829999999999999716e+01	6.540000000000000568e+01	6.600000000000000000e+01
6.620000000000000284e+01	7.090000000000000568e+01	6.139999999999999858e+01	6.559999999999999432e+01	6.289999999999999858e+01	6.350000000000000000e+01	6.279999999999999716e+01	6.790000000000000568e+01	6.189999999999999858e+01	3.920000000000000284e+01	6.320000000000000284e+01	6.990000000000000568e+01	6.459999999999999432e+01	6.350000000000000000e+01	6.429999999999999716e+01	6.590000000000000568e+01	6.509999999999999432e+01	6.100000000000000000e+01	7.150000000000000000e+01	6.620000000000000284e+01	6.329999999999999716e+01	6.289999999999999858e+01	6.829999999999999716e+01	6.520000000000000284e+01	6.750000000000000000e+01	6.490000000000000568e+01	6.879999999999999716e+01	6.470000000000000284e+01	6.129999999999999716e+01	6.339999999999999858e+01	6.420000000000000284e+01	6.759999999999999432e+01	6.490000000000000568e+01	6.859999999999999432e+01	6.490000000000000568e+01	6.490000000000000568e+01	6.370000000000000284e+01	6.490000000000000568e+01	6.400000000000000000e+01	6.859999999999999432e+01	6.570000000000000284e+01	6.829999999999999716e+01	6.579999999999999716e+01	6.459999999999999432e+01	6.029999999999999716e+01	6.729999999999999716e+01	6.509999999999999432e+01	6.920000000000000284e+01	6.650000000000000000e+01	6.490000000000000568e+01
6.600000000000000000e+01	6.829999999999999716e+01	6.070000000000000284e+01	6.160000000000000142e+01	6.300000000000000000e+01	6.360000000000000142e+01	6.440000000000000568e+01	6.690000000000000568e+01	6.420000000000000284e+01	4.000000000000000000e+01	6.350000000000000000e+01	6.979999999999999716e+01	6.479999999999999716e+01	6.609999999999999432e+01	6.010000000000000142e+01	6.600000000000000000e+01	6.509999999999999432e+01	6.389999999999999858e+01	6.909999999999999432e+01	6.650000000000000000e+01	6.110000000000000142e+01	6.329999999999999716e+01	6.759999999999999432e+01	6.520000000000000284e+01	6.500000000000000000e+01	6.490000000000000568e+01	6.729999999999999716e+01	6.470000000000000284e+01	6.320000000000000284e+01	5.820000000000000284e+01	6.229999999999999716e+01	6.459999999999999432e+01	6.490000000000000568e+01	6.809999999999999432e+01	6.039999999999999858e+01	6.490000000000000568e+01	6.400000000000000000e+01	6.490000000000000568e+01	6.690000000000000568e+01	6.809999999999999432e+01	6.709999999999999432e+01	6.629999999999999716e+01	6.790000000000000568e+01	6.459999999999999432e+01	5.979999999999999716e+01	6.709999999999999432e+01	6.339999999999999858e+01	7.000000000000000000e+01	6.659999999999999432e+01	6.559999999999999432e+01
6.740000000000000568e+01	6.859999999999999432e+01	5.839999999999999858e+01	6.220000000000000284e+01	6.179999999999999716e+01	5.300000000000000000e+01	6.400000000000000000e+01	6.590000000000000568e+01	6.400000000000000000e+01	3.879999999999999716e+01	6.250000000000000000e+01	6.829999999999999716e+01	6.500000000000000000e+01	6.160000000000000142e+01	6.139999999999999858e+01	6.520000000000000284e+01	6.509999999999999432e+01	6.379999999999999716e+01	7.050000000000000000e+01	6.779999999999999716e+01	5.900000000000000000e+01	6.670000000000000284e+01	6.879999999999999716e+01	6.520000000000000284e+01	6.590000000000000568e+01	6.490000000000000568e+01	6.959999999999999432e+01	6.470000000000000284e+01	6.470000000000000284e+01	6.220000000000000284e+01	6.300000000000000000e+01	6.600000000000000000e+01	6.490000000000000568e+01	7.109999999999999432e+01	6.160000000000000142e+01	6.490000000000000568e+01	6.620000000000000284e+01	6.490000000000000568e+01	6.759999999999999432e+01	6.750000000000000000e+01	6.670000000000000284e+01	6.779999999999999716e+01	6.750000000000000000e+01	6.459999999999999432e+01	6.060000000000000142e+01	6.970000000000000284e+01	6.079999999999999716e+01	7.090000000000000568e+01	6.970000000000000284e+01	6.700000000000000000e+01
6.400000000000000000e+01	6.540000000000000568e+01	5.979999999999999716e+01	6.470000000000000284e+01	6.170000000000000284e+01	6.120000000000000284e+01	6.809999999999999432e+01	6.239999999999999858e+01	6.329999999999999716e+01	4.079999999999999716e+01	5.910000000000000142e+01	6.870000000000000284e+01	6.459999999999999432e+01	6.520000000000000284e+01	6.360000000000000142e+01	6.490000000000000568e+01	6.509999999999999432e+01	6.239999999999999858e+01	7.100000000000000000e+01	6.709999999999999432e+01	6.329999999999999716e+01	6.720000000000000284e+01	6.979999999999999716e+01	6.520000000000000284e+01	6.709999999999999432e+01	6.490000000000000568e+01	6.979999999999999716e+01	6.470000000000000284e+01	6.590000000000000568e+01	6.279999999999999716e+01	6.520000000000000284e+01	6.500000000000000000e+01	6.490000000000000568e+01	7.040000000000000568e+01	6.350000000000000000e+01	6.490000000000000568e+01	6.600000000000000000e+01	6.490000000000000568e+01	6.609999999999999432e+01	6.779999999999999716e+01	6.620000000000000284e+01	6.859999999999999432e+01	6.920000000000000284e+01	6.459999999999999432e+01	6.020000000000000284e+01	6.820000000000000284e+01	6.750000000000000000e+01	7.079999999999999716e+01	6.940000000000000568e+01	6.650000000000000000e+01
6.629999999999999716e+01	6.039999999999999858e+01	5.939999999999999858e+01	6.490000000000000568e+01	6.289999999999999858e+01	5.420000000000000284e+01	6.339999999999999858e+01	5.800000000000000000e+01	5.960000000000000142e+01	4.300000000000000000e+01	6.400000000000000000e+01	6.389999999999999858e+01	6.479999999999999716e+01	6.429999999999999716e+01	6.520000000000000284e+01	6.070000000000000284e+01	6.490000000000000568e+01	6.020000000000000284e+01	7.129999999999999716e+01	6.559999999999999432e+01	6.590000000000000568e+01	6.740000000000000568e+01	6.979999999999999716e+01	6.520000000000000284e+01	6.759999999999999432e+01	6.470000000000000284e+01	6.970000000000000284e+01	6.470000000000000284e+01	6.700000000000000000e+01	6.300000000000000000e+01	6.540000000000000568e+01	6.720000000000000284e+01	6.509999999999999432e+01	6.970000000000000284e+01	6.570000000000000284e+01	6.500000000000000000e+01	6.640000000000000568e+01	6.490000000000000568e+01	6.629999999999999716e+01	6.829999999999999716e+01	6.570000000000000284e+01	6.809999999999999432e+01	6.740000000000000568e+01	6.459999999999999432e+01	6.029999999999999716e+01	6.809999999999999432e+01	6.870000000000000284e+01	7.090000000000000568e+01	7.109999999999999432e+01	6.620000000000000284e+01
6.600000000000000000e+01	6.570000000000000284e+01	5.900000000000000000e+01	6.470000000000000284e+01	6.200000000000000000e+01	6.170000000000000284e+01	6.720000000000000284e+01	6.239999999999999858e+01	6.160000000000000142e+01	3.800000000000000000e+01	6.579999999999999716e+01	6.470000000000000284e+01	6.470000000000000284e+01	6.070000000000000284e+01	6.420000000000000284e+01	6.060000000000000142e+01	6.500000000000000000e+01	6.409999999999999432e+01	7.120000000000000284e+01	6.970000000000000284e+01	6.389999999999999858e+01	6.640000000000000568e+01	6.890000000000000568e+01	6.520000000000000284e+01	6.750000000000000000e+01	6.470000000000000284e+01	6.970000000000000284e+01	6.509999999999999432e+01	6.529999999999999716e+01	6.229999999999999716e+01	6.409999999999999432e+01	6.759999999999999432e+01	6.509999999999999432e+01	7.079999999999999716e+01	6.650000000000000000e+01	6.500000000000000000e+01	6.270000000000000284e+01	6.490000000000000568e+01	6.659999999999999432e+01	7.050000000000000000e+01	6.289999999999999858e+01	6.890000000000000568e+01	6.850000000000000000e+01	6.459999999999999432e+01	6.500000000000000000e+01	7.000000000000000000e+01	6.420000000000000284e+01	7.070000000000000284e+01	7.020000000000000284e+01	6.550000000000000000e+01
7.029999999999999716e+01	6.750000000000000000e+01	5.560000000000000142e+01	6.470000000000000284e+01	5.929999999999999716e+01	6.500000000000000000e+01	6.559999999999999432e+01	6.459999999999999432e+01	6.039999999999999858e+01	3.950000000000000000e+01	6.339999999999999858e+01	6.759999999999999432e+01	6.479999999999999716e+01	6.650000000000000000e+01	6.329999999999999716e+01	6.400000000000000000e+01	6.500000000000000000e+01	6.370000000000000284e+01	7.129999999999999716e+01	7.009999999999999432e+01	6.740000000000000568e+01	6.690000000000000568e+01	6.740000000000000568e+01	6.520000000000000284e+01	6.829999999999999716e+01	6.470000000000000284e+01	6.890000000000000568e+01	6.509999999999999432e+01	6.700000000000000000e+01	5.929999999999999716e+01	6.210000000000000142e+01	7.050000000000000000e+01	6.509999999999999432e+01	6.729999999999999716e+01	6.929999999999999716e+01	6.500000000000000000e+01	6.289999999999999858e+01	6.490000000000000568e+01	6.709999999999999432e+01	7.250000000000000000e+01	6.509999999999999432e+01	6.840000000000000568e+01	6.709999999999999432e+01	6.459999999999999432e+01	6.379999999999999716e+01	6.929999999999999716e+01	7.079999999999999716e+01	7.050000000000000000e+01	7.040000000000000568e+01	6.559999999999999432e+01
6.920000000000000284e+01	7.029999999999999716e+01	5.910000000000000142e+01	6.120000000000000284e+01	6.300000000000000000e+01	6.759999999999999432e+01	6.690000000000000568e+01	6.509999999999999432e+01	6.179999999999999716e+01	5.000000000000000000e+01	6.320000000000000284e+01	6.870000000000000284e+01	6.479999999999999716e+01	6.270000000000000284e+01	6.060000000000000142e+01	6.470000000000000284e+01	6.509999999999999432e+01	6.490000000000000568e+01	7.209999999999999432e+01	7.200000000000000000e+01	6.579999999999999716e+01	6.759999999999999432e+01	6.690000000000000568e+01	6.520000000000000284e+01	6.770000000000000284e+01	6.470000000000000284e+01	6.779999999999999716e+01	6.500000000000000000e+01	6.679999999999999716e+01	6.110000000000000142e+01	6.550000000000000000e+01	7.120000000000000284e+01	6.509999999999999432e+01	6.720000000000000284e+01	7.220000000000000284e+01	6.500000000000000000e+01	6.450000000000000000e+01	6.490000000000000568e+01	6.829999999999999716e+01	7.300000000000000000e+01	6.809999999999999432e+01	6.909999999999999432e+01	6.890000000000000568e+01	6.470000000000000284e+01	6.520000000000000284e+01	7.009999999999999432e+01	6.870000000000000284e+01	7.009999999999999432e+01	6.990000000000000568e+01	6.729999999999999716e+01
6.940000000000000568e+01	7.200000000000000000e+01	5.579999999999999716e+01	6.160000000000000142e+01	5.920000000000000284e+01	6.709999999999999432e+01	6.600000000000000000e+01	6.759999999999999432e+01	6.310000000000000142e+01	4.850000000000000000e+01	6.170000000000000284e+01	6.800000000000000000e+01	6.500000000000000000e+01	6.300000000000000000e+01	6.170000000000000284e+01	6.790000000000000568e+01	6.500000000000000000e+01	6.679999999999999716e+01	7.220000000000000284e+01	7.359999999999999432e+01	6.559999999999999432e+01	7.000000000000000000e+01	6.879999999999999716e+01	6.500000000000000000e+01	6.820000000000000284e+01	6.470000000000000284e+01	6.779999999999999716e+01	6.490000000000000568e+01	6.929999999999999716e+01	6.389999999999999858e+01	6.800000000000000000e+01	6.900000000000000000e+01	6.490000000000000568e+01	6.820000000000000284e+01	7.079999999999999716e+01	6.490000000000000568e+01	6.890000000000000568e+01	6.490000000000000568e+01	6.770000000000000284e+01	7.270000000000000284e+01	6.809999999999999432e+01	6.940000000000000568e+01	6.709999999999999432e+01	6.470000000000000284e+01	6.520000000000000284e+01	6.890000000000000568e+01	6.750000000000000000e+01	6.959999999999999432e+01	6.970000000000000284e+01	6.729999999999999716e+01
7.150000000000000000e+01	7.090000000000000568e+01	5.900000000000000000e+01	6.200000000000000000e+01	6.289999999999999858e+01	6.579999999999999716e+01	6.609999999999999432e+01	6.720000000000000284e+01	6.429999999999999716e+01	3.810000000000000142e+01	6.520000000000000284e+01	6.950000000000000000e+01	6.520000000000000284e+01	6.360000000000000142e+01	6.350000000000000000e+01	6.679999999999999716e+01	6.509999999999999432e+01	6.690000000000000568e+01	7.000000000000000000e+01	7.400000000000000000e+01	6.620000000000000284e+01	7.250000000000000000e+01	6.940000000000000568e+01	6.500000000000000000e+01	6.709999999999999432e+01	6.470000000000000284e+01	6.979999999999999716e+01	6.490000000000000568e+01	6.970000000000000284e+01	6.470000000000000284e+01	6.859999999999999432e+01	6.940000000000000568e+01	6.490000000000000568e+01	6.970000000000000284e+01	6.579999999999999716e+01	6.490000000000000568e+01	6.779999999999999716e+01	6.490000000000000568e+01	6.790000000000000568e+01	7.170000000000000284e+01	7.000000000000000000e+01	6.879999999999999716e+01	6.709999999999999432e+01	6.470000000000000284e+01	6.529999999999999716e+01	6.900000000000000000e+01	6.740000000000000568e+01	7.070000000000000284e+01	7.220000000000000284e+01	6.600000000000000000e+01
6.829999999999999716e+01	7.370000000000000284e+01	5.820000000000000284e+01	6.389999999999999858e+01	6.100000000000000000e+01	6.909999999999999432e+01	6.690000000000000568e+01	6.890000000000000568e+01	6.429999999999999716e+01	3.910000000000000142e+01	6.179999999999999716e+01	7.250000000000000000e+01	6.490000000000000568e+01	5.960000000000000142e+01	6.559999999999999432e+01	6.859999999999999432e+01	6.520000000000000284e+01	6.629999999999999716e+01	7.120000000000000284e+01	7.179999999999999716e+01	6.239999999999999858e+01	7.129999999999999716e+01	6.990000000000000568e+01	6.509999999999999432e+01	6.790000000000000568e+01	6.470000000000000284e+01	7.009999999999999432e+01	6.490000000000000568e+01	6.820000000000000284e+01	6.579999999999999716e+01	7.109999999999999432e+01	6.879999999999999716e+01	6.490000000000000568e+01	6.850000000000000000e+01	6.459999999999999432e+01	6.490000000000000568e+01	7.000000000000000000e+01	6.490000000000000568e+01	6.790000000000000568e+01	7.550000000000000000e+01	6.950000000000000000e+01	6.920000000000000284e+01	6.829999999999999716e+01	6.470000000000000284e+01	6.559999999999999432e+01	6.820000000000000284e+01	6.400000000000000000e+01	6.990000000000000568e+01	6.940000000000000568e+01	6.729999999999999716e+01
7.000000000000000000e+01	6.650000000000000000e+01	6.120000000000000284e+01	6.529999999999999716e+01	6.479999999999999716e+01	6.500000000000000000e+01	6.429999999999999716e+01	6.409999999999999432e+01	6.479999999999999716e+01	3.870000000000000284e+01	6.320000000000000284e+01	6.940000000000000568e+01	6.479999999999999716e+01	6.409999999999999432e+01	6.650000000000000000e+01	6.490000000000000568e+01	6.500000000000000000e+01	6.500000000000000000e+01	6.970000000000000284e+01	6.840000000000000568e+01	6.279999999999999716e+01	7.109999999999999432e+01	6.650000000000000000e+01	6.520000000000000284e+01	6.729999999999999716e+01	6.470000000000000284e+01	6.779999999999999716e+01	6.490000000000000568e+01	6.800000000000000000e+01	6.350000000000000000e+01	6.859999999999999432e+01	6.809999999999999432e+01	6.490000000000000568e+01	6.829999999999999716e+01	6.670000000000000284e+01	6.529999999999999716e+01	7.140000000000000568e+01	6.490000000000000568e+01	6.750000000000000000e+01	7.059999999999999432e+01	6.800000000000000000e+01	6.870000000000000284e+01	6.720000000000000284e+01	6.470000000000000284e+01	6.600000000000000000e+01	6.850000000000000000e+01	6.490000000000000568e+01	6.800000000000000000e+01	6.829999999999999716e+01	6.600000000000000000e+01
6.490000000000000568e+01	6.940000000000000568e+01	6.039999999999999858e+01	6.620000000000000284e+01	6.279999999999999716e+01	6.740000000000000568e+01	6.779999999999999716e+01	6.350000000000000000e+01	6.389999999999999858e+01	3.970000000000000284e+01	6.250000000000000000e+01	6.950000000000000000e+01	6.459999999999999432e+01	6.590000000000000568e+01	6.770000000000000284e+01	6.459999999999999432e+01	6.509999999999999432e+01	6.310000000000000142e+01	7.029999999999999716e+01	6.900000000000000000e+01	6.050000000000000000e+01	6.700000000000000000e+01	6.759999999999999432e+01	6.509999999999999432e+01	6.770000000000000284e+01	6.470000000000000284e+01	6.770000000000000284e+01	6.529999999999999716e+01	6.520000000000000284e+01	6.000000000000000000e+01	6.659999999999999432e+01	6.820000000000000284e+01	6.490000000000000568e+01	6.959999999999999432e+01	6.579999999999999716e+01	6.529999999999999716e+01	6.640000000000000568e+01	6.490000000000000568e+01	6.470000000000000284e+01	7.090000000000000568e+01	6.500000000000000000e+01	6.890000000000000568e+01	6.700000000000000000e+01	6.529999999999999716e+01	6.210000000000000142e+01	6.879999999999999716e+01	5.860000000000000142e+01	6.909999999999999432e+01	6.670000000000000284e+01	6.690000000000000568e+01
6.540000000000000568e+01	7.129999999999999716e+01	6.279999999999999716e+01	6.379999999999999716e+01	6.470000000000000284e+01	6.550000000000000000e+01	6.400000000000000000e+01	6.520000000000000284e+01	6.370000000000000284e+01	3.750000000000000000e+01	6.370000000000000284e+01	6.979999999999999716e+01	6.490000000000000568e+01	6.959999999999999432e+01	6.400000000000000000e+01	6.579999999999999716e+01	6.509999999999999432e+01	6.429999999999999716e+01	7.020000000000000284e+01	6.850000000000000000e+01	5.979999999999999716e+01	6.559999999999999432e+01	6.709999999999999432e+01	6.500000000000000000e+01	6.770000000000000284e+01	6.459999999999999432e+01	6.740000000000000568e+01	6.520000000000000284e+01	6.500000000000000000e+01	6.260000000000000142e+01	6.720000000000000284e+01	6.300000000000000000e+01	6.479999999999999716e+01	6.929999999999999716e+01	6.490000000000000568e+01	6.509999999999999432e+01	6.420000000000000284e+01	6.490000000000000568e+01	6.320000000000000284e+01	7.170000000000000284e+01	6.540000000000000568e+01	6.829999999999999716e+01	6.650000000000000000e+01	6.509999999999999432e+01	6.500000000000000000e+01	6.700000000000000000e+01	5.970000000000000284e+01	6.829999999999999716e+01	6.520000000000000284e+01	6.829999999999999716e+01
6.459999999999999432e+01	7.109999999999999432e+01	5.839999999999999858e+01	6.310000000000000142e+01	6.450000000000000000e+01	6.800000000000000000e+01	6.770000000000000284e+01	6.429999999999999716e+01	6.279999999999999716e+01	3.629999999999999716e+01	6.529999999999999716e+01	7.120000000000000284e+01	6.479999999999999716e+01	6.700000000000000000e+01	6.420000000000000284e+01	6.690000000000000568e+01	6.509999999999999432e+01	6.079999999999999716e+01	7.000000000000000000e+01	7.000000000000000000e+01	6.129999999999999716e+01	6.559999999999999432e+01	6.759999999999999432e+01	6.520000000000000284e+01	6.650000000000000000e+01	6.459999999999999432e+01	6.579999999999999716e+01	6.500000000000000000e+01	6.409999999999999432e+01	6.279999999999999716e+01	6.490000000000000568e+01	6.470000000000000284e+01	6.479999999999999716e+01	6.879999999999999716e+01	6.429999999999999716e+01	6.500000000000000000e+01	6.720000000000000284e+01	6.479999999999999716e+01	6.529999999999999716e+01	6.970000000000000284e+01	6.479999999999999716e+01	6.820000000000000284e+01	6.690000000000000568e+01	6.500000000000000000e+01	6.550000000000000000e+01	6.900000000000000000e+01	6.070000000000000284e+01	6.979999999999999716e+01	6.640000000000000568e+01	6.779999999999999716e+01
6.609999999999999432e+01	6.750000000000000000e+01	6.289999999999999858e+01	6.490000000000000568e+01	6.690000000000000568e+01	6.709999999999999432e+01	6.590000000000000568e+01	6.220000000000000284e+01	6.120000000000000284e+01	4.120000000000000284e+01	6.829999999999999716e+01	6.859999999999999432e+01	6.490000000000000568e+01	7.100000000000000000e+01	6.629999999999999716e+01	6.350000000000000000e+01	6.500000000000000000e+01	6.200000000000000000e+01	7.070000000000000284e+01	6.950000000000000000e+01	5.989999999999999858e+01	6.690000000000000568e+01	6.840000000000000568e+01	6.509999999999999432e+01	6.720000000000000284e+01	6.459999999999999432e+01	6.570000000000000284e+01	6.500000000000000000e+01	6.509999999999999432e+01	6.160000000000000142e+01	6.540000000000000568e+01	6.570000000000000284e+01	6.479999999999999716e+01	7.040000000000000568e+01	6.550000000000000000e+01	6.500000000000000000e+01	6.540000000000000568e+01	6.479999999999999716e+01	6.459999999999999432e+01	7.109999999999999432e+01	6.779999999999999716e+01	6.879999999999999716e+01	6.850000000000000000e+01	6.500000000000000000e+01	6.540000000000000568e+01	7.000000000000000000e+01	5.889999999999999858e+01	6.859999999999999432e+01	6.570000000000000284e+01	6.759999999999999432e+01
6.579999999999999716e+01	6.859999999999999432e+01	6.279999999999999716e+01	6.550000000000000000e+01	6.770000000000000284e+01	7.100000000000000000e+01	6.779999999999999716e+01	6.420000000000000284e+01	6.329999999999999716e+01	4.889999999999999858e+01	6.300000000000000000e+01	6.890000000000000568e+01	6.520000000000000284e+01	6.859999999999999432e+01	6.840000000000000568e+01	6.570000000000000284e+01	6.509999999999999432e+01	6.150000000000000000e+01	7.059999999999999432e+01	6.970000000000000284e+01	6.300000000000000000e+01	7.009999999999999432e+01	6.620000000000000284e+01	6.490000000000000568e+01	6.759999999999999432e+01	6.479999999999999716e+01	6.370000000000000284e+01	6.500000000000000000e+01	6.720000000000000284e+01	6.329999999999999716e+01	6.770000000000000284e+01	6.759999999999999432e+01	6.490000000000000568e+01	6.590000000000000568e+01	6.470000000000000284e+01	6.490000000000000568e+01	7.009999999999999432e+01	6.479999999999999716e+01	6.640000000000000568e+01	6.929999999999999716e+01	6.870000000000000284e+01	6.900000000000000000e+01	6.679999999999999716e+01	6.500000000000000000e+01	6.520000000000000284e+01	7.040000000000000568e+01	6.400000000000000000e+01	6.600000000000000000e+01	6.170000000000000284e+01	6.720000000000000284e+01
6.590000000000000568e+01	6.929999999999999716e+01	6.320000000000000284e+01	6.350000000000000000e+01	6.840000000000000568e+01	6.909999999999999432e+01	6.559999999999999432e+01	6.459999999999999432e+01	6.210000000000000142e+01	4.570000000000000284e+01	5.950000000000000000e+01	6.990000000000000568e+01	6.479999999999999716e+01	6.859999999999999432e+01	6.360000000000000142e+01	6.640000000000000568e+01	6.509999999999999432e+01	6.350000000000000000e+01	6.920000000000000284e+01	7.040000000000000568e+01	6.670000000000000284e+01	6.800000000000000000e+01	6.950000000000000000e+01	6.490000000000000568e+01	6.720000000000000284e+01	6.479999999999999716e+01	6.759999999999999432e+01	6.529999999999999716e+01	6.679999999999999716e+01	6.440000000000000568e+01	7.170000000000000284e+01	6.790000000000000568e+01	6.479999999999999716e+01	6.859999999999999432e+01	6.659999999999999432e+01	6.490000000000000568e+01	7.140000000000000568e+01	6.479999999999999716e+01	6.679999999999999716e+01	7.279999999999999716e+01	6.850000000000000000e+01	6.870000000000000284e+01	6.770000000000000284e+01	6.509999999999999432e+01	6.500000000000000000e+01	7.059999999999999432e+01	6.920000000000000284e+01	6.950000000000000000e+01	6.720000000000000284e+01	6.929999999999999716e+01
6.709999999999999432e+01	6.850000000000000000e+01	6.570000000000000284e+01	6.850000000000000000e+01	7.170000000000000284e+01	6.879999999999999716e+01	6.570000000000000284e+01	6.520000000000000284e+01	5.800000000000000000e+01	3.370000000000000284e+01	5.950000000000000000e+01	6.759999999999999432e+01	6.500000000000000000e+01	7.159999999999999432e+01	6.629999999999999716e+01	6.270000000000000284e+01	6.509999999999999432e+01	6.360000000000000142e+01	7.070000000000000284e+01	7.059999999999999432e+01	6.740000000000000568e+01	7.009999999999999432e+01	6.920000000000000284e+01	6.490000000000000568e+01	6.890000000000000568e+01	6.479999999999999716e+01	6.759999999999999432e+01	6.520000000000000284e+01	6.859999999999999432e+01	6.210000000000000142e+01	6.920000000000000284e+01	7.050000000000000000e+01	6.490000000000000568e+01	6.779999999999999716e+01	6.890000000000000568e+01	6.479999999999999716e+01	6.990000000000000568e+01	6.479999999999999716e+01	6.720000000000000284e+01	7.159999999999999432e+01	7.079999999999999716e+01	6.970000000000000284e+01	6.770000000000000284e+01	6.500000000000000000e+01	6.520000000000000284e+01	7.070000000000000284e+01	6.959999999999999432e+01	6.900000000000000000e+01	6.790000000000000568e+01	6.629999999999999716e+01
7.070000000000000284e+01	7.020000000000000284e+01	6.970000000000000284e+01	6.729999999999999716e+01	7.309999999999999432e+01	6.900000000000000000e+01	6.679999999999999716e+01	6.709999999999999432e+01	6.129999999999999716e+01	3.670000000000000284e+01	5.700000000000000000e+01	6.890000000000000568e+01	6.470000000000000284e+01	6.920000000000000284e+01	6.570000000000000284e+01	6.370000000000000284e+01	6.490000000000000568e+01	6.770000000000000284e+01	6.850000000000000000e+01	7.259999999999999432e+01	6.879999999999999716e+01	6.870000000000000284e+01	6.260000000000000142e+01	6.520000000000000284e+01	6.720000000000000284e+01	6.479999999999999716e+01	6.829999999999999716e+01	6.500000000000000000e+01	6.840000000000000568e+01	6.360000000000000142e+01	6.940000000000000568e+01	6.979999999999999716e+01	6.490000000000000568e+01	7.040000000000000568e+01	6.759999999999999432e+01	6.479999999999999716e+01	6.979999999999999716e+01	6.479999999999999716e+01	6.790000000000000568e+01	7.190000000000000568e+01	6.940000000000000568e+01	6.790000000000000568e+01	6.850000000000000000e+01	6.500000000000000000e+01	6.509999999999999432e+01	7.000000000000000000e+01	6.920000000000000284e+01	6.920000000000000284e+01	6.559999999999999432e+01	6.759999999999999432e+01
7.059999999999999432e+01	7.190000000000000568e+01	7.050000000000000000e+01	6.239999999999999858e+01	7.409999999999999432e+01	6.759999999999999432e+01	6.620000000000000284e+01	6.859999999999999432e+01	6.289999999999999858e+01	4.329999999999999716e+01	5.720000000000000284e+01	7.070000000000000284e+01	6.450000000000000000e+01	7.120000000000000284e+01	6.010000000000000142e+01	6.470000000000000284e+01	6.479999999999999716e+01	6.940000000000000568e+01	7.100000000000000000e+01	7.550000000000000000e+01	6.790000000000000568e+01	6.709999999999999432e+01	6.759999999999999432e+01	6.479999999999999716e+01	6.829999999999999716e+01	6.490000000000000568e+01	6.809999999999999432e+01	6.520000000000000284e+01	6.729999999999999716e+01	6.300000000000000000e+01	6.900000000000000000e+01	6.879999999999999716e+01	6.490000000000000568e+01	7.300000000000000000e+01	6.659999999999999432e+01	6.500000000000000000e+01	6.850000000000000000e+01	6.479999999999999716e+01	7.009999999999999432e+01	7.300000000000000000e+01	6.900000000000000000e+01	6.890000000000000568e+01	7.020000000000000284e+01	6.570000000000000284e+01	6.779999999999999716e+01	6.909999999999999432e+01	6.890000000000000568e+01	7.020000000000000284e+01	6.820000000000000284e+01	6.870000000000000284e+01
6.870000000000000284e+01	7.009999999999999432e+01	6.479999999999999716e+01	6.409999999999999432e+01	6.959999999999999432e+01	6.620000000000000284e+01	6.400000000000000000e+01	6.720000000000000284e+01	5.989999999999999858e+01	4.450000000000000000e+01	6.120000000000000284e+01	7.079999999999999716e+01	6.389999999999999858e+01	6.840000000000000568e+01	6.310000000000000142e+01	6.429999999999999716e+01	6.490000000000000568e+01	6.379999999999999716e+01	6.940000000000000568e+01	7.509999999999999432e+01	6.640000000000000568e+01	6.600000000000000000e+01	6.900000000000000000e+01	6.420000000000000284e+01	6.879999999999999716e+01	6.529999999999999716e+01	6.879999999999999716e+01	6.520000000000000284e+01	6.529999999999999716e+01	6.389999999999999858e+01	6.779999999999999716e+01	6.920000000000000284e+01	6.520000000000000284e+01	7.200000000000000000e+01	6.700000000000000000e+01	6.479999999999999716e+01	6.770000000000000284e+01	6.479999999999999716e+01	6.959999999999999432e+01	7.479999999999999716e+01	6.870000000000000284e+01	6.979999999999999716e+01	6.929999999999999716e+01	6.540000000000000568e+01	6.920000000000000284e+01	6.940000000000000568e+01	6.840000000000000568e+01	7.090000000000000568e+01	6.820000000000000284e+01	6.809999999999999432e+01
6.909999999999999432e+01	6.820000000000000284e+01	6.870000000000000284e+01	6.459999999999999432e+01	7.150000000000000000e+01	6.700000000000000000e+01	6.509999999999999432e+01	6.400000000000000000e+01	5.900000000000000000e+01	4.639999999999999858e+01	5.800000000000000000e+01	6.870000000000000284e+01	6.409999999999999432e+01	6.459999999999999432e+01	6.279999999999999716e+01	6.250000000000000000e+01	6.479999999999999716e+01	6.310000000000000142e+01	7.200000000000000000e+01	7.179999999999999716e+01	6.650000000000000000e+01	6.409999999999999432e+01	6.929999999999999716e+01	5.770000000000000284e+01	7.020000000000000284e+01	6.809999999999999432e+01	6.909999999999999432e+01	6.509999999999999432e+01	6.370000000000000284e+01	6.179999999999999716e+01	6.650000000000000000e+01	6.850000000000000000e+01	6.509999999999999432e+01	7.000000000000000000e+01	6.650000000000000000e+01	6.479999999999999716e+01	6.700000000000000000e+01	6.479999999999999716e+01	6.890000000000000568e+01	7.459999999999999432e+01	6.790000000000000568e+01	7.150000000000000000e+01	6.950000000000000000e+01	6.529999999999999716e+01	6.540000000000000568e+01	7.000000000000000000e+01	6.770000000000000284e+01	7.079999999999999716e+01	6.590000000000000568e+01	6.750000000000000000e+01
7.120000000000000284e+01	6.829999999999999716e+01	6.859999999999999432e+01	6.609999999999999432e+01	7.090000000000000568e+01	6.570000000000000284e+01	6.470000000000000284e+01	6.540000000000000568e+01	5.979999999999999716e+01	4.989999999999999858e+01	6.079999999999999716e+01	6.940000000000000568e+01	5.429999999999999716e+01	6.900000000000000000e+01	6.670000000000000284e+01	6.260000000000000142e+01	6.479999999999999716e+01	6.379999999999999716e+01	6.750000000000000000e+01	7.240000000000000568e+01	6.459999999999999432e+01	6.540000000000000568e+01	6.920000000000000284e+01	5.650000000000000000e+01	6.740000000000000568e+01	6.629999999999999716e+01	6.859999999999999432e+01	6.509999999999999432e+01	6.490000000000000568e+01	6.150000000000000000e+01	6.529999999999999716e+01	6.670000000000000284e+01	6.509999999999999432e+01	6.909999999999999432e+01	6.339999999999999858e+01	6.479999999999999716e+01	6.720000000000000284e+01	6.479999999999999716e+01	6.750000000000000000e+01	7.179999999999999716e+01	6.840000000000000568e+01	6.840000000000000568e+01	6.990000000000000568e+01	6.509999999999999432e+01	6.540000000000000568e+01	7.000000000000000000e+01	6.609999999999999432e+01	6.879999999999999716e+01	6.590000000000000568e+01	6.759999999999999432e+01
7.100000000000000000e+01	6.909999999999999432e+01	6.470000000000000284e+01	6.479999999999999716e+01	6.959999999999999432e+01	6.940000000000000568e+01	6.759999999999999432e+01	6.220000000000000284e+01	6.120000000000000284e+01	5.410000000000000142e+01	5.700000000000000000e+01	6.820000000000000284e+01	5.900000000000000000e+01	6.640000000000000568e+01	6.300000000000000000e+01	6.470000000000000284e+01	6.540000000000000568e+01	6.310000000000000142e+01	6.779999999999999716e+01	6.990000000000000568e+01	6.179999999999999716e+01	6.820000000000000284e+01	7.040000000000000568e+01	6.370000000000000284e+01	6.859999999999999432e+01	6.570000000000000284e+01	6.890000000000000568e+01	6.509999999999999432e+01	6.740000000000000568e+01	6.360000000000000142e+01	7.070000000000000284e+01	6.629999999999999716e+01	6.500000000000000000e+01	7.100000000000000000e+01	6.329999999999999716e+01	6.479999999999999716e+01	6.900000000000000000e+01	6.490000000000000568e+01	6.450000000000000000e+01	7.109999999999999432e+01	6.990000000000000568e+01	6.890000000000000568e+01	6.840000000000000568e+01	6.500000000000000000e+01	6.520000000000000284e+01	7.209999999999999432e+01	6.350000000000000000e+01	7.050000000000000000e+01	6.959999999999999432e+01	6.829999999999999716e+01
7.340000000000000568e+01	6.950000000000000000e+01	6.160000000000000142e+01	6.339999999999999858e+01	6.809999999999999432e+01	6.700000000000000000e+01	6.540000000000000568e+01	5.979999999999999716e+01	6.120000000000000284e+01	4.850000000000000000e+01	5.789999999999999858e+01	6.840000000000000568e+01	6.179999999999999716e+01	6.540000000000000568e+01	6.239999999999999858e+01	6.450000000000000000e+01	6.690000000000000568e+01	6.289999999999999858e+01	7.040000000000000568e+01	6.940000000000000568e+01	6.279999999999999716e+01	6.750000000000000000e+01	6.970000000000000284e+01	6.890000000000000568e+01	6.929999999999999716e+01	6.529999999999999716e+01	6.850000000000000000e+01	6.500000000000000000e+01	6.779999999999999716e+01	6.400000000000000000e+01	7.159999999999999432e+01	6.729999999999999716e+01	6.490000000000000568e+01	6.859999999999999432e+01	6.709999999999999432e+01	6.490000000000000568e+01	6.940000000000000568e+01	6.470000000000000284e+01	6.500000000000000000e+01	7.170000000000000284e+01	6.870000000000000284e+01	7.090000000000000568e+01	6.900000000000000000e+01	6.490000000000000568e+01	6.479999999999999716e+01	7.190000000000000568e+01	6.579999999999999716e+01	6.840000000000000568e+01	6.850000000000000000e+01	6.720000000000000284e+01
7.320000000000000284e+01	7.329999999999999716e+01	6.079999999999999716e+01	6.470000000000000284e+01	6.729999999999999716e+01	6.859999999999999432e+01	6.790000000000000568e+01	6.440000000000000568e+01	6.270000000000000284e+01	3.839999999999999858e+01	6.050000000000000000e+01	7.109999999999999432e+01	6.350000000000000000e+01	6.459999999999999432e+01	6.320000000000000284e+01	6.570000000000000284e+01	6.720000000000000284e+01	6.039999999999999858e+01	6.979999999999999716e+01	6.709999999999999432e+01	6.529999999999999716e+01	6.820000000000000284e+01	6.970000000000000284e+01	6.550000000000000000e+01	6.920000000000000284e+01	6.550000000000000000e+01	6.859999999999999432e+01	6.500000000000000000e+01	6.879999999999999716e+01	6.370000000000000284e+01	6.800000000000000000e+01	6.890000000000000568e+01	6.509999999999999432e+01	7.000000000000000000e+01	6.690000000000000568e+01	6.500000000000000000e+01	6.779999999999999716e+01	6.490000000000000568e+01	6.470000000000000284e+01	7.050000000000000000e+01	6.829999999999999716e+01	6.950000000000000000e+01	6.929999999999999716e+01	6.490000000000000568e+01	6.339999999999999858e+01	7.220000000000000284e+01	6.729999999999999716e+01	6.979999999999999716e+01	6.879999999999999716e+01	6.659999999999999432e+01
7.250000000000000000e+01	7.290000000000000568e+01	5.889999999999999858e+01	6.609999999999999432e+01	6.570000000000000284e+01	7.100000000000000000e+01	6.979999999999999716e+01	6.420000000000000284e+01	6.270000000000000284e+01	4.460000000000000142e+01	5.760000000000000142e+01	7.029999999999999716e+01	6.409999999999999432e+01	6.670000000000000284e+01	6.379999999999999716e+01	6.650000000000000000e+01	6.600000000000000000e+01	6.360000000000000142e+01	7.059999999999999432e+01	6.909999999999999432e+01	6.440000000000000568e+01	6.850000000000000000e+01	6.750000000000000000e+01	7.140000000000000568e+01	6.900000000000000000e+01	6.529999999999999716e+01	6.800000000000000000e+01	6.500000000000000000e+01	6.790000000000000568e+01	6.379999999999999716e+01	6.790000000000000568e+01	6.779999999999999716e+01	6.529999999999999716e+01	6.779999999999999716e+01	6.659999999999999432e+01	6.509999999999999432e+01	6.970000000000000284e+01	6.500000000000000000e+01	6.559999999999999432e+01	7.140000000000000568e+01	6.250000000000000000e+01	7.029999999999999716e+01	6.979999999999999716e+01	6.500000000000000000e+01	6.470000000000000284e+01	7.129999999999999716e+01	6.670000000000000284e+01	6.809999999999999432e+01	6.740000000000000568e+01	6.670000000000000284e+01
7.279999999999999716e+01	7.200000000000000000e+01	6.150000000000000000e+01	6.429999999999999716e+01	6.690000000000000568e+01	6.929999999999999716e+01	6.759999999999999432e+01	6.440000000000000568e+01	6.370000000000000284e+01	4.920000000000000284e+01	5.870000000000000284e+01	7.190000000000000568e+01	6.470000000000000284e+01	6.779999999999999716e+01	6.429999999999999716e+01	6.829999999999999716e+01	6.570000000000000284e+01	6.559999999999999432e+01	6.829999999999999716e+01	6.950000000000000000e+01	6.470000000000000284e+01	7.040000000000000568e+01	6.759999999999999432e+01	3.670000000000000284e+01	6.820000000000000284e+01	6.500000000000000000e+01	6.740000000000000568e+01	6.520000000000000284e+01	6.879999999999999716e+01	6.490000000000000568e+01	7.009999999999999432e+01	6.770000000000000284e+01	6.479999999999999716e+01	6.740000000000000568e+01	6.540000000000000568e+01	6.509999999999999432e+01	7.229999999999999716e+01	6.520000000000000284e+01	6.540000000000000568e+01	7.050000000000000000e+01	5.539999999999999858e+01	6.990000000000000568e+01	6.900000000000000000e+01	6.529999999999999716e+01	6.429999999999999716e+01	7.100000000000000000e+01	6.600000000000000000e+01	6.859999999999999432e+01	6.779999999999999716e+01	6.700000000000000000e+01
7.240000000000000568e+01	7.000000000000000000e+01	6.579999999999999716e+01	6.740000000000000568e+01	6.790000000000000568e+01	6.979999999999999716e+01	6.970000000000000284e+01	6.409999999999999432e+01	6.350000000000000000e+01	5.439999999999999858e+01	5.910000000000000142e+01	7.129999999999999716e+01	6.509999999999999432e+01	6.750000000000000000e+01	6.940000000000000568e+01	6.659999999999999432e+01	6.520000000000000284e+01	6.189999999999999858e+01	6.870000000000000284e+01	7.100000000000000000e+01	6.420000000000000284e+01	6.720000000000000284e+01	6.790000000000000568e+01	3.339999999999999858e+01	6.740000000000000568e+01	6.500000000000000000e+01	6.709999999999999432e+01	6.500000000000000000e+01	6.629999999999999716e+01	6.750000000000000000e+01	7.240000000000000568e+01	6.579999999999999716e+01	6.470000000000000284e+01	6.670000000000000284e+01	6.540000000000000568e+01	6.500000000000000000e+01	7.029999999999999716e+01	6.500000000000000000e+01	6.700000000000000000e+01	6.959999999999999432e+01	4.950000000000000000e+01	6.909999999999999432e+01	6.829999999999999716e+01	6.509999999999999432e+01	6.479999999999999716e+01	7.059999999999999432e+01	6.350000000000000000e+01	6.920000000000000284e+01	6.859999999999999432e+01	6.729999999999999716e+01
7.390000000000000568e+01	7.209999999999999432e+01	6.800000000000000000e+01	6.670000000000000284e+01	6.870000000000000284e+01	7.000000000000000000e+01	7.050000000000000000e+01	6.600000000000000000e+01	6.360000000000000142e+01	5.920000000000000284e+01	6.039999999999999858e+01	7.129999999999999716e+01	6.500000000000000000e+01	7.029999999999999716e+01	6.959999999999999432e+01	6.690000000000000568e+01	6.559999999999999432e+01	6.440000000000000568e+01	6.700000000000000000e+01	6.979999999999999716e+01	6.459999999999999432e+01	6.829999999999999716e+01	6.700000000000000000e+01	2.360000000000000142e+01	6.859999999999999432e+01	6.490000000000000568e+01	6.790000000000000568e+01	6.509999999999999432e+01	6.740000000000000568e+01	6.289999999999999858e+01	6.770000000000000284e+01	6.679999999999999716e+01	6.479999999999999716e+01	6.840000000000000568e+01	6.500000000000000000e+01	6.500000000000000000e+01	6.979999999999999716e+01	6.470000000000000284e+01	6.570000000000000284e+01	6.970000000000000284e+01	5.379999999999999716e+01	7.009999999999999432e+01	6.800000000000000000e+01	6.500000000000000000e+01	6.400000000000000000e+01	7.100000000000000000e+01	6.389999999999999858e+01	6.879999999999999716e+01	6.829999999999999716e+01	6.690000000000000568e+01
7.370000000000000284e+01	7.040000000000000568e+01	7.009999999999999432e+01	6.690000000000000568e+01	6.900000000000000000e+01	6.779999999999999716e+01	6.829999999999999716e+01	6.709999999999999432e+01	6.320000000000000284e+01	5.539999999999999858e+01	6.250000000000000000e+01	7.009999999999999432e+01	6.509999999999999432e+01	6.870000000000000284e+01	6.929999999999999716e+01	6.690000000000000568e+01	6.490000000000000568e+01	6.289999999999999858e+01	6.829999999999999716e+01	6.920000000000000284e+01	6.440000000000000568e+01	6.929999999999999716e+01	6.650000000000000000e+01	4.020000000000000284e+01	6.929999999999999716e+01	6.490000000000000568e+01	6.700000000000000000e+01	6.509999999999999432e+01	6.709999999999999432e+01	6.189999999999999858e+01	6.659999999999999432e+01	6.529999999999999716e+01	6.470000000000000284e+01	6.850000000000000000e+01	6.350000000000000000e+01	6.479999999999999716e+01	6.970000000000000284e+01	6.479999999999999716e+01	6.479999999999999716e+01	6.740000000000000568e+01	4.929999999999999716e+01	6.979999999999999716e+01	6.909999999999999432e+01	6.500000000000000000e+01	6.370000000000000284e+01	7.090000000000000568e+01	6.520000000000000284e+01	7.009999999999999432e+01	6.900000000000000000e+01	6.770000000000000284e+01
7.500000000000000000e+01	7.109999999999999432e+01	7.159999999999999432e+01	6.959999999999999432e+01	6.929999999999999716e+01	6.840000000000000568e+01	7.050000000000000000e+01	6.890000000000000568e+01	6.350000000000000000e+01	4.939999999999999858e+01	6.120000000000000284e+01	6.909999999999999432e+01	6.470000000000000284e+01	6.859999999999999432e+01	7.209999999999999432e+01	6.709999999999999432e+01	6.389999999999999858e+01	6.470000000000000284e+01	6.629999999999999716e+01	6.959999999999999432e+01	6.360000000000000142e+01	6.700000000000000000e+01	6.690000000000000568e+01	5.389999999999999858e+01	6.750000000000000000e+01	6.490000000000000568e+01	6.700000000000000000e+01	6.500000000000000000e+01	6.490000000000000568e+01	5.829999999999999716e+01	5.960000000000000142e+01	6.470000000000000284e+01	6.450000000000000000e+01	6.970000000000000284e+01	6.300000000000000000e+01	6.459999999999999432e+01	6.890000000000000568e+01	6.500000000000000000e+01	6.620000000000000284e+01	6.740000000000000568e+01	5.150000000000000000e+01	6.850000000000000000e+01	6.900000000000000000e+01	6.479999999999999716e+01	6.429999999999999716e+01	6.809999999999999432e+01	6.629999999999999716e+01	7.000000000000000000e+01	6.929999999999999716e+01	6.840000000000000568e+01
7.320000000000000284e+01	7.259999999999999432e+01	7.150000000000000000e+01	6.690000000000000568e+01	6.870000000000000284e+01	6.879999999999999716e+01	6.750000000000000000e+01	6.990000000000000568e+01	6.370000000000000284e+01	4.929999999999999716e+01	6.300000000000000000e+01	7.079999999999999716e+01	6.500000000000000000e+01	6.770000000000000284e+01	7.050000000000000000e+01	6.759999999999999432e+01	6.329999999999999716e+01	6.279999999999999716e+01	6.729999999999999716e+01	6.959999999999999432e+01	6.170000000000000284e+01	6.809999999999999432e+01	6.900000000000000000e+01	6.120000000000000284e+01	6.820000000000000284e+01	6.490000000000000568e+01	6.890000000000000568e+01	6.500000000000000000e+01	6.550000000000000000e+01	6.060000000000000142e+01	6.310000000000000142e+01	6.400000000000000000e+01	6.479999999999999716e+01	7.150000000000000000e+01	6.310000000000000142e+01	6.459999999999999432e+01	6.959999999999999432e+01	6.500000000000000000e+01	6.670000000000000284e+01	6.640000000000000568e+01	4.920000000000000284e+01	6.890000000000000568e+01	6.920000000000000284e+01	6.479999999999999716e+01	6.500000000000000000e+01	6.859999999999999432e+01	6.450000000000000000e+01	7.079999999999999716e+01	7.100000000000000000e+01	6.809999999999999432e+01
7.629999999999999716e+01	7.209999999999999432e+01	6.479999999999999716e+01	6.670000000000000284e+01	6.239999999999999858e+01	6.940000000000000568e+01	6.800000000000000000e+01	6.970000000000000284e+01	6.289999999999999858e+01	5.460000000000000142e+01	6.029999999999999716e+01	6.940000000000000568e+01	6.550000000000000000e+01	6.890000000000000568e+01	6.859999999999999432e+01	6.600000000000000000e+01	6.320000000000000284e+01	6.210000000000000142e+01	6.859999999999999432e+01	6.800000000000000000e+01	6.170000000000000284e+01	6.559999999999999432e+01	7.059999999999999432e+01	6.490000000000000568e+01	6.909999999999999432e+01	6.479999999999999716e+01	7.040000000000000568e+01	6.500000000000000000e+01	6.400000000000000000e+01	6.189999999999999858e+01	6.620000000000000284e+01	6.520000000000000284e+01	6.490000000000000568e+01	7.250000000000000000e+01	6.370000000000000284e+01	6.450000000000000000e+01	6.920000000000000284e+01	6.509999999999999432e+01	6.590000000000000568e+01	6.679999999999999716e+01	5.289999999999999858e+01	7.020000000000000284e+01	7.109999999999999432e+01	6.490000000000000568e+01	6.270000000000000284e+01	6.850000000000000000e+01	6.429999999999999716e+01	7.190000000000000568e+01	7.209999999999999432e+01	6.859999999999999432e+01
7.770000000000000284e+01	7.779999999999999716e+01	6.440000000000000568e+01	5.839999999999999858e+01	6.129999999999999716e+01	7.000000000000000000e+01	6.870000000000000284e+01	7.529999999999999716e+01	6.500000000000000000e+01	4.860000000000000142e+01	6.060000000000000142e+01	7.579999999999999716e+01	6.490000000000000568e+01	7.070000000000000284e+01	6.360000000000000142e+01	7.040000000000000568e+01	6.329999999999999716e+01	6.170000000000000284e+01	7.079999999999999716e+01	6.750000000000000000e+01	6.079999999999999716e+01	6.210000000000000142e+01	7.079999999999999716e+01	6.659999999999999432e+01	7.150000000000000000e+01	6.490000000000000568e+01	7.100000000000000000e+01	6.509999999999999432e+01	6.179999999999999716e+01	6.150000000000000000e+01	6.450000000000000000e+01	6.590000000000000568e+01	6.479999999999999716e+01	6.950000000000000000e+01	6.470000000000000284e+01	6.479999999999999716e+01	6.909999999999999432e+01	6.479999999999999716e+01	6.479999999999999716e+01	6.900000000000000000e+01	6.289999999999999858e+01	7.220000000000000284e+01	7.179999999999999716e+01	6.490000000000000568e+01	6.050000000000000000e+01	6.859999999999999432e+01	6.260000000000000142e+01	7.170000000000000284e+01	7.209999999999999432e+01	6.909999999999999432e+01
7.270000000000000284e+01	7.629999999999999716e+01	5.720000000000000284e+01	4.970000000000000284e+01	5.550000000000000000e+01	6.640000000000000568e+01	6.520000000000000284e+01	7.350000000000000000e+01	6.420000000000000284e+01	4.389999999999999858e+01	5.970000000000000284e+01	7.490000000000000568e+01	6.479999999999999716e+01	6.529999999999999716e+01	5.020000000000000284e+01	6.940000000000000568e+01	5.979999999999999716e+01	5.850000000000000000e+01	6.750000000000000000e+01	6.540000000000000568e+01	6.129999999999999716e+01	6.210000000000000142e+01	6.940000000000000568e+01	6.250000000000000000e+01	6.820000000000000284e+01	6.509999999999999432e+01	6.879999999999999716e+01	6.500000000000000000e+01	6.150000000000000000e+01	5.839999999999999858e+01	6.079999999999999716e+01	6.540000000000000568e+01	6.509999999999999432e+01	6.570000000000000284e+01	6.389999999999999858e+01	6.520000000000000284e+01	6.559999999999999432e+01	6.490000000000000568e+01	6.320000000000000284e+01	6.840000000000000568e+01	6.229999999999999716e+01	6.950000000000000000e+01	7.040000000000000568e+01	6.490000000000000568e+01	5.929999999999999716e+01	6.579999999999999716e+01	6.360000000000000142e+01	6.950000000000000000e+01	6.940000000000000568e+01	6.809999999999999432e+01
6.929999999999999716e+01	7.290000000000000568e+01	5.139999999999999858e+01	4.470000000000000284e+01	5.100000000000000000e+01	6.470000000000000284e+01	6.360000000000000142e+01	6.890000000000000568e+01	6.350000000000000000e+01	4.639999999999999858e+01	5.750000000000000000e+01	7.240000000000000568e+01	6.490000000000000568e+01	6.529999999999999716e+01	4.429999999999999716e+01	6.859999999999999432e+01	5.860000000000000142e+01	5.520000000000000284e+01	6.750000000000000000e+01	6.520000000000000284e+01	5.920000000000000284e+01	5.979999999999999716e+01	6.540000000000000568e+01	6.020000000000000284e+01	6.740000000000000568e+01	6.490000000000000568e+01	6.759999999999999432e+01	6.500000000000000000e+01	5.929999999999999716e+01	5.889999999999999858e+01	6.000000000000000000e+01	6.379999999999999716e+01	6.540000000000000568e+01	6.509999999999999432e+01	6.220000000000000284e+01	6.509999999999999432e+01	6.450000000000000000e+01	6.490000000000000568e+01	6.289999999999999858e+01	6.479999999999999716e+01	6.210000000000000142e+01	6.820000000000000284e+01	6.890000000000000568e+01	6.490000000000000568e+01	6.000000000000000000e+01	6.459999999999999432e+01	6.120000000000000284e+01	6.820000000000000284e+01	6.800000000000000000e+01	6.709999999999999432e+01
6.809999999999999432e+01	7.050000000000000000e+01	4.839999999999999858e+01	4.560000000000000142e+01	4.800000000000000000e+01	6.520000000000000284e+01	6.420000000000000284e+01	6.679999999999999716e+01	6.210000000000000142e+01	4.129999999999999716e+01	5.910000000000000142e+01	7.050000000000000000e+01	6.529999999999999716e+01	6.550000000000000000e+01	3.650000000000000000e+01	6.600000000000000000e+01	5.720000000000000284e+01	5.420000000000000284e+01	6.679999999999999716e+01	6.500000000000000000e+01	5.879999999999999716e+01	5.910000000000000142e+01	6.570000000000000284e+01	5.779999999999999716e+01	6.679999999999999716e+01	6.500000000000000000e+01	6.790000000000000568e+01	6.509999999999999432e+01	5.850000000000000000e+01	5.389999999999999858e+01	5.379999999999999716e+01	6.379999999999999716e+01	6.609999999999999432e+01	6.459999999999999432e+01	6.229999999999999716e+01	6.550000000000000000e+01	6.129999999999999716e+01	6.500000000000000000e+01	6.420000000000000284e+01	6.659999999999999432e+01	6.160000000000000142e+01	6.840000000000000568e+01	6.790000000000000568e+01	6.470000000000000284e+01	5.770000000000000284e+01	6.360000000000000142e+01	6.210000000000000142e+01	6.750000000000000000e+01	6.620000000000000284e+01	6.850000000000000000e+01
6.620000000000000284e+01	6.850000000000000000e+01	4.470000000000000284e+01	4.220000000000000284e+01	4.429999999999999716e+01	6.379999999999999716e+01	6.239999999999999858e+01	6.459999999999999432e+01	6.150000000000000000e+01	3.450000000000000000e+01	5.450000000000000000e+01	6.959999999999999432e+01	6.490000000000000568e+01	6.540000000000000568e+01	3.620000000000000284e+01	6.459999999999999432e+01	5.670000000000000284e+01	5.379999999999999716e+01	6.990000000000000568e+01	6.420000000000000284e+01	6.010000000000000142e+01	5.870000000000000284e+01	6.329999999999999716e+01	5.800000000000000000e+01	6.800000000000000000e+01	6.509999999999999432e+01	6.750000000000000000e+01	6.500000000000000000e+01	5.739999999999999858e+01	4.829999999999999716e+01	4.100000000000000000e+01	6.579999999999999716e+01	6.579999999999999716e+01	6.520000000000000284e+01	6.509999999999999432e+01	6.500000000000000000e+01	6.279999999999999716e+01	6.509999999999999432e+01	6.320000000000000284e+01	6.800000000000000000e+01	6.000000000000000000e+01	7.000000000000000000e+01	6.329999999999999716e+01	6.490000000000000568e+01	5.520000000000000284e+01	6.229999999999999716e+01	6.440000000000000568e+01	6.790000000000000568e+01	6.700000000000000000e+01	6.770000000000000284e+01
6.540000000000000568e+01	6.779999999999999716e+01	4.520000000000000284e+01	4.089999999999999858e+01	4.500000000000000000e+01	6.110000000000000142e+01	6.000000000000000000e+01	6.409999999999999432e+01	6.200000000000000000e+01	3.039999999999999858e+01	5.729999999999999716e+01	6.950000000000000000e+01	6.470000000000000284e+01	6.200000000000000000e+01	3.200000000000000000e+01	6.389999999999999858e+01	5.660000000000000142e+01	5.679999999999999716e+01	6.920000000000000284e+01	6.429999999999999716e+01	6.010000000000000142e+01	5.520000000000000284e+01	6.550000000000000000e+01	5.820000000000000284e+01	6.690000000000000568e+01	6.470000000000000284e+01	6.690000000000000568e+01	6.509999999999999432e+01	5.470000000000000284e+01	4.250000000000000000e+01	3.450000000000000000e+01	6.579999999999999716e+01	6.620000000000000284e+01	6.429999999999999716e+01	6.350000000000000000e+01	6.559999999999999432e+01	5.710000000000000142e+01	6.540000000000000568e+01	6.260000000000000142e+01	6.859999999999999432e+01	5.800000000000000000e+01	6.950000000000000000e+01	6.220000000000000284e+01	6.490000000000000568e+01	5.679999999999999716e+01	6.189999999999999858e+01	6.220000000000000284e+01	6.650000000000000000e+01	6.540000000000000568e+01	6.790000000000000568e+01
6.450000000000000000e+01	6.590000000000000568e+01	4.410000000000000142e+01	3.929999999999999716e+01	4.350000000000000000e+01	6.020000000000000284e+01	6.050000000000000000e+01	6.389999999999999858e+01	5.189999999999999858e+01	2.660000000000000142e+01	5.650000000000000000e+01	6.060000000000000142e+01	6.479999999999999716e+01	6.000000000000000000e+01	3.150000000000000000e+01	5.039999999999999858e+01	5.670000000000000284e+01	5.850000000000000000e+01	6.750000000000000000e+01	6.559999999999999432e+01	6.110000000000000142e+01	5.350000000000000000e+01	6.709999999999999432e+01	5.829999999999999716e+01	6.559999999999999432e+01	6.409999999999999432e+01	6.750000000000000000e+01	6.490000000000000568e+01	5.389999999999999858e+01	3.689999999999999858e+01	2.960000000000000142e+01	6.620000000000000284e+01	6.620000000000000284e+01	6.590000000000000568e+01	6.490000000000000568e+01	6.440000000000000568e+01	4.600000000000000000e+01	6.470000000000000284e+01	6.289999999999999858e+01	6.759999999999999432e+01	5.800000000000000000e+01	6.840000000000000568e+01	6.540000000000000568e+01	6.490000000000000568e+01	5.950000000000000000e+01	6.139999999999999858e+01	6.329999999999999716e+01	6.720000000000000284e+01	6.600000000000000000e+01	6.790000000000000568e+01
6.279999999999999716e+01	6.609999999999999432e+01	4.489999999999999858e+01	4.289999999999999858e+01	4.439999999999999858e+01	6.250000000000000000e+01	6.000000000000000000e+01	6.389999999999999858e+01	5.270000000000000284e+01	2.880000000000000071e+01	5.500000000000000000e+01	5.110000000000000142e+01	6.429999999999999716e+01	5.739999999999999858e+01	3.019999999999999929e+01	5.089999999999999858e+01	5.250000000000000000e+01	5.829999999999999716e+01	6.640000000000000568e+01	6.490000000000000568e+01	6.100000000000000000e+01	5.060000000000000142e+01	6.520000000000000284e+01	5.460000000000000142e+01	6.420000000000000284e+01	6.420000000000000284e+01	6.570000000000000284e+01	6.409999999999999432e+01	5.079999999999999716e+01	3.410000000000000142e+01	2.489999999999999858e+01	6.490000000000000568e+01	6.459999999999999432e+01	6.620000000000000284e+01	6.260000000000000142e+01	6.310000000000000142e+01	3.370000000000000284e+01	6.479999999999999716e+01	6.370000000000000284e+01	6.590000000000000568e+01	5.779999999999999716e+01	6.690000000000000568e+01	6.490000000000000568e+01	6.339999999999999858e+01	5.970000000000000284e+01	5.079999999999999716e+01	6.339999999999999858e+01	6.670000000000000284e+01	6.479999999999999716e+01	6.779999999999999716e+01
5.779999999999999716e+01	6.700000000000000000e+01	4.429999999999999716e+01	4.510000000000000142e+01	4.450000000000000000e+01	6.100000000000000000e+01	5.829999999999999716e+01	6.409999999999999432e+01	5.370000000000000284e+01	3.000000000000000000e+01	5.420000000000000284e+01	5.500000000000000000e+01	6.400000000000000000e+01	5.550000000000000000e+01	3.229999999999999716e+01	5.270000000000000284e+01	5.289999999999999858e+01	5.850000000000000000e+01	6.579999999999999716e+01	6.720000000000000284e+01	6.000000000000000000e+01	3.710000000000000142e+01	6.409999999999999432e+01	5.139999999999999858e+01	6.360000000000000142e+01	6.470000000000000284e+01	6.450000000000000000e+01	6.370000000000000284e+01	3.650000000000000000e+01	3.110000000000000142e+01	2.489999999999999858e+01	6.279999999999999716e+01	6.400000000000000000e+01	6.790000000000000568e+01	6.170000000000000284e+01	6.310000000000000142e+01	3.030000000000000071e+01	6.429999999999999716e+01	6.400000000000000000e+01	6.509999999999999432e+01	5.689999999999999858e+01	6.629999999999999716e+01	6.570000000000000284e+01	6.329999999999999716e+01	6.210000000000000142e+01	5.520000000000000284e+01	6.170000000000000284e+01	6.670000000000000284e+01	6.420000000000000284e+01	6.659999999999999432e+01
5.000000000000000000e+01	6.629999999999999716e+01	4.270000000000000284e+01	3.960000000000000142e+01	4.310000000000000142e+01	5.989999999999999858e+01	5.350000000000000000e+01	6.329999999999999716e+01	5.770000000000000284e+01	2.900000000000000000e+01	5.239999999999999858e+01	6.079999999999999716e+01	6.409999999999999432e+01	4.979999999999999716e+01	2.719999999999999929e+01	5.860000000000000142e+01	5.329999999999999716e+01	5.810000000000000142e+01	6.520000000000000284e+01	6.659999999999999432e+01	5.889999999999999858e+01	4.079999999999999716e+01	6.220000000000000284e+01	5.170000000000000284e+01	6.200000000000000000e+01	6.370000000000000284e+01	6.470000000000000284e+01	6.379999999999999716e+01	4.010000000000000142e+01	3.000000000000000000e+01	2.100000000000000000e+01	6.110000000000000142e+01	6.459999999999999432e+01	6.670000000000000284e+01	5.689999999999999858e+01	6.270000000000000284e+01	2.269999999999999929e+01	6.360000000000000142e+01	6.490000000000000568e+01	6.339999999999999858e+01	5.950000000000000000e+01	6.540000000000000568e+01	6.609999999999999432e+01	6.360000000000000142e+01	6.100000000000000000e+01	5.039999999999999858e+01	6.079999999999999716e+01	6.629999999999999716e+01	6.310000000000000142e+01	6.690000000000000568e+01
4.810000000000000142e+01	6.759999999999999432e+01	4.329999999999999716e+01	4.010000000000000142e+01	4.329999999999999716e+01	4.070000000000000284e+01	5.370000000000000284e+01	6.300000000000000000e+01	5.389999999999999858e+01	2.560000000000000142e+01	4.850000000000000000e+01	6.579999999999999716e+01	6.409999999999999432e+01	5.320000000000000284e+01	2.839999999999999858e+01	6.210000000000000142e+01	5.470000000000000284e+01	5.700000000000000000e+01	6.239999999999999858e+01	6.609999999999999432e+01	5.929999999999999716e+01	3.060000000000000142e+01	6.409999999999999432e+01	5.000000000000000000e+01	6.210000000000000142e+01	6.409999999999999432e+01	6.620000000000000284e+01	6.400000000000000000e+01	2.960000000000000142e+01	3.169999999999999929e+01	2.539999999999999858e+01	5.689999999999999858e+01	6.320000000000000284e+01	6.570000000000000284e+01	4.520000000000000284e+01	6.350000000000000000e+01	2.150000000000000000e+01	6.409999999999999432e+01	6.479999999999999716e+01	5.989999999999999858e+01	6.039999999999999858e+01	6.470000000000000284e+01	6.650000000000000000e+01	6.440000000000000568e+01	5.939999999999999858e+01	5.570000000000000284e+01	6.189999999999999858e+01	6.679999999999999716e+01	6.339999999999999858e+01	6.579999999999999716e+01
4.820000000000000284e+01	6.820000000000000284e+01	4.360000000000000142e+01	3.670000000000000284e+01	4.420000000000000284e+01	4.270000000000000284e+01	3.829999999999999716e+01	6.350000000000000000e+01	5.379999999999999716e+01	2.350000000000000000e+01	5.050000000000000000e+01	6.790000000000000568e+01	6.459999999999999432e+01	5.379999999999999716e+01	2.830000000000000071e+01	6.270000000000000284e+01	5.410000000000000142e+01	5.739999999999999858e+01	6.339999999999999858e+01	6.629999999999999716e+01	6.160000000000000142e+01	2.830000000000000071e+01	6.420000000000000284e+01	4.770000000000000284e+01	6.170000000000000284e+01	6.260000000000000142e+01	6.559999999999999432e+01	6.509999999999999432e+01	2.980000000000000071e+01	3.320000000000000284e+01	2.700000000000000000e+01	5.550000000000000000e+01	6.239999999999999858e+01	6.360000000000000142e+01	3.850000000000000000e+01	6.170000000000000284e+01	2.119999999999999929e+01	5.789999999999999858e+01	6.490000000000000568e+01	4.650000000000000000e+01	6.100000000000000000e+01	6.559999999999999432e+01	6.310000000000000142e+01	6.509999999999999432e+01	5.929999999999999716e+01	5.010000000000000142e+01	6.329999999999999716e+01	6.609999999999999432e+01	6.279999999999999716e+01	6.529999999999999716e+01
4.400000000000000000e+01	6.679999999999999716e+01	4.429999999999999716e+01	3.610000000000000142e+01	4.489999999999999858e+01	4.489999999999999858e+01	3.670000000000000284e+01	6.229999999999999716e+01	5.639999999999999858e+01	2.539999999999999858e+01	5.370000000000000284e+01	6.740000000000000568e+01	6.470000000000000284e+01	5.460000000000000142e+01	2.889999999999999858e+01	6.339999999999999858e+01	5.670000000000000284e+01	5.929999999999999716e+01	5.560000000000000142e+01	6.720000000000000284e+01	6.170000000000000284e+01	2.780000000000000071e+01	6.450000000000000000e+01	5.439999999999999858e+01	6.239999999999999858e+01	6.279999999999999716e+01	6.500000000000000000e+01	6.520000000000000284e+01	2.969999999999999929e+01	3.300000000000000000e+01	2.589999999999999858e+01	5.639999999999999858e+01	6.100000000000000000e+01	6.450000000000000000e+01	3.850000000000000000e+01	6.179999999999999716e+01	2.280000000000000071e+01	5.539999999999999858e+01	6.579999999999999716e+01	3.700000000000000000e+01	6.039999999999999858e+01	6.529999999999999716e+01	6.420000000000000284e+01	6.479999999999999716e+01	6.079999999999999716e+01	5.679999999999999716e+01	6.420000000000000284e+01	6.550000000000000000e+01	6.289999999999999858e+01	6.540000000000000568e+01
4.120000000000000284e+01	6.659999999999999432e+01	4.479999999999999716e+01	3.370000000000000284e+01	4.439999999999999858e+01	3.920000000000000284e+01	3.810000000000000142e+01	6.239999999999999858e+01	5.929999999999999716e+01	2.919999999999999929e+01	5.360000000000000142e+01	6.609999999999999432e+01	6.400000000000000000e+01	5.470000000000000284e+01	2.560000000000000142e+01	6.289999999999999858e+01	5.660000000000000142e+01	5.810000000000000142e+01	4.320000000000000284e+01	6.670000000000000284e+01	6.100000000000000000e+01	3.019999999999999929e+01	6.479999999999999716e+01	5.200000000000000000e+01	5.820000000000000284e+01	6.210000000000000142e+01	6.590000000000000568e+01	6.509999999999999432e+01	2.919999999999999929e+01	3.250000000000000000e+01	2.619999999999999929e+01	5.610000000000000142e+01	6.029999999999999716e+01	6.420000000000000284e+01	3.250000000000000000e+01	6.409999999999999432e+01	2.439999999999999858e+01	5.239999999999999858e+01	6.490000000000000568e+01	3.260000000000000142e+01	6.210000000000000142e+01	5.610000000000000142e+01	6.579999999999999716e+01	6.490000000000000568e+01	6.170000000000000284e+01	5.989999999999999858e+01	6.350000000000000000e+01	6.670000000000000284e+01	6.459999999999999432e+01	6.459999999999999432e+01
4.079999999999999716e+01	6.640000000000000568e+01	4.460000000000000142e+01	3.370000000000000284e+01	4.510000000000000142e+01	3.119999999999999929e+01	4.110000000000000142e+01	6.179999999999999716e+01	5.970000000000000284e+01	2.919999999999999929e+01	5.310000000000000142e+01	6.490000000000000568e+01	6.450000000000000000e+01	5.620000000000000284e+01	2.550000000000000000e+01	6.179999999999999716e+01	5.829999999999999716e+01	5.960000000000000142e+01	3.920000000000000284e+01	6.640000000000000568e+01	5.960000000000000142e+01	2.589999999999999858e+01	6.520000000000000284e+01	5.050000000000000000e+01	4.410000000000000142e+01	5.920000000000000284e+01	6.609999999999999432e+01	6.490000000000000568e+01	2.710000000000000142e+01	3.160000000000000142e+01	2.510000000000000142e+01	5.470000000000000284e+01	6.039999999999999858e+01	6.370000000000000284e+01	3.139999999999999858e+01	6.640000000000000568e+01	2.219999999999999929e+01	5.050000000000000000e+01	6.590000000000000568e+01	2.830000000000000071e+01	6.150000000000000000e+01	5.010000000000000142e+01	6.570000000000000284e+01	6.520000000000000284e+01	6.150000000000000000e+01	6.120000000000000284e+01	6.110000000000000142e+01	6.640000000000000568e+01	6.370000000000000284e+01	6.289999999999999858e+01
4.660000000000000142e+01	6.520000000000000284e+01	4.579999999999999716e+01	3.329999999999999716e+01	4.420000000000000284e+01	2.810000000000000142e+01	2.800000000000000000e+01	6.179999999999999716e+01	5.979999999999999716e+01	3.200000000000000000e+01	5.610000000000000142e+01	6.479999999999999716e+01	6.479999999999999716e+01	5.150000000000000000e+01	2.469999999999999929e+01	6.189999999999999858e+01	5.750000000000000000e+01	5.760000000000000142e+01	3.239999999999999858e+01	6.609999999999999432e+01	5.879999999999999716e+01	3.529999999999999716e+01	6.179999999999999716e+01	4.920000000000000284e+01	4.110000000000000142e+01	5.679999999999999716e+01	6.479999999999999716e+01	6.550000000000000000e+01	3.250000000000000000e+01	3.130000000000000071e+01	2.530000000000000071e+01	5.289999999999999858e+01	5.889999999999999858e+01	6.329999999999999716e+01	3.500000000000000000e+01	6.440000000000000568e+01	2.489999999999999858e+01	5.050000000000000000e+01	6.529999999999999716e+01	2.689999999999999858e+01	6.010000000000000142e+01	4.560000000000000142e+01	6.470000000000000284e+01	6.540000000000000568e+01	5.850000000000000000e+01	6.270000000000000284e+01	5.960000000000000142e+01	6.640000000000000568e+01	6.289999999999999858e+01	5.110000000000000142e+01
4.289999999999999858e+01	6.750000000000000000e+01	4.460000000000000142e+01	3.460000000000000142e+01	4.250000000000000000e+01	3.520000000000000284e+01	2.519999999999999929e+01	6.529999999999999716e+01	5.979999999999999716e+01	2.569999999999999929e+01	5.520000000000000284e+01	6.659999999999999432e+01	6.420000000000000284e+01	5.629999999999999716e+01	2.280000000000000071e+01	6.279999999999999716e+01	5.700000000000000000e+01	5.870000000000000284e+01	2.830000000000000071e+01	6.459999999999999432e+01	5.829999999999999716e+01	2.850000000000000000e+01	6.320000000000000284e+01	4.870000000000000284e+01	3.220000000000000284e+01	5.220000000000000284e+01	6.409999999999999432e+01	6.529999999999999716e+01	2.860000000000000142e+01	3.169999999999999929e+01	2.450000000000000000e+01	5.460000000000000142e+01	5.810000000000000142e+01	6.420000000000000284e+01	3.589999999999999858e+01	6.490000000000000568e+01	2.710000000000000142e+01	4.970000000000000284e+01	6.400000000000000000e+01	2.650000000000000000e+01	6.110000000000000142e+01	4.160000000000000142e+01	6.429999999999999716e+01	6.500000000000000000e+01	5.720000000000000284e+01	6.310000000000000142e+01	5.950000000000000000e+01	6.600000000000000000e+01	6.260000000000000142e+01	3.750000000000000000e+01
3.770000000000000284e+01	6.829999999999999716e+01	4.339999999999999858e+01	3.160000000000000142e+01	3.950000000000000000e+01	3.080000000000000071e+01	3.080000000000000071e+01	6.620000000000000284e+01	5.910000000000000142e+01	2.789999999999999858e+01	5.520000000000000284e+01	6.720000000000000284e+01	6.440000000000000568e+01	5.939999999999999858e+01	2.280000000000000071e+01	6.260000000000000142e+01	5.660000000000000142e+01	5.939999999999999858e+01	2.869999999999999929e+01	6.379999999999999716e+01	5.970000000000000284e+01	3.539999999999999858e+01	6.070000000000000284e+01	4.650000000000000000e+01	2.939999999999999858e+01	5.200000000000000000e+01	6.579999999999999716e+01	6.470000000000000284e+01	3.450000000000000000e+01	3.520000000000000284e+01	3.279999999999999716e+01	5.650000000000000000e+01	5.610000000000000142e+01	6.500000000000000000e+01	3.670000000000000284e+01	6.550000000000000000e+01	2.519999999999999929e+01	4.800000000000000000e+01	6.329999999999999716e+01	2.419999999999999929e+01	6.079999999999999716e+01	3.960000000000000142e+01	6.440000000000000568e+01	6.620000000000000284e+01	5.620000000000000284e+01	6.300000000000000000e+01	6.229999999999999716e+01	6.700000000000000000e+01	6.420000000000000284e+01	3.339999999999999858e+01
2.950000000000000000e+01	6.900000000000000000e+01	4.350000000000000000e+01	3.100000000000000000e+01	3.950000000000000000e+01	3.629999999999999716e+01	2.689999999999999858e+01	6.620000000000000284e+01	6.260000000000000142e+01	2.360000000000000142e+01	5.710000000000000142e+01	6.950000000000000000e+01	6.500000000000000000e+01	6.139999999999999858e+01	2.069999999999999929e+01	6.559999999999999432e+01	5.589999999999999858e+01	6.070000000000000284e+01	2.669999999999999929e+01	6.570000000000000284e+01	6.160000000000000142e+01	2.980000000000000071e+01	6.189999999999999858e+01	4.339999999999999858e+01	2.850000000000000000e+01	5.210000000000000142e+01	6.570000000000000284e+01	6.490000000000000568e+01	2.750000000000000000e+01	3.610000000000000142e+01	3.119999999999999929e+01	5.639999999999999858e+01	5.650000000000000000e+01	6.509999999999999432e+01	3.339999999999999858e+01	6.450000000000000000e+01	2.130000000000000071e+01	4.829999999999999716e+01	6.450000000000000000e+01	2.560000000000000142e+01	6.139999999999999858e+01	4.060000000000000142e+01	6.429999999999999716e+01	6.520000000000000284e+01	5.800000000000000000e+01	6.179999999999999716e+01	6.400000000000000000e+01	6.529999999999999716e+01	6.279999999999999716e+01	3.589999999999999858e+01
2.600000000000000000e+01	7.029999999999999716e+01	4.479999999999999716e+01	3.010000000000000142e+01	4.070000000000000284e+01	3.250000000000000000e+01	3.030000000000000071e+01	6.800000000000000000e+01	6.139999999999999858e+01	2.269999999999999929e+01	5.800000000000000000e+01	6.940000000000000568e+01	6.520000000000000284e+01	6.270000000000000284e+01	2.050000000000000000e+01	6.389999999999999858e+01	5.589999999999999858e+01	5.989999999999999858e+01	2.760000000000000142e+01	6.609999999999999432e+01	6.239999999999999858e+01	2.880000000000000071e+01	6.060000000000000142e+01	4.400000000000000000e+01	2.619999999999999929e+01	5.110000000000000142e+01	6.440000000000000568e+01	6.440000000000000568e+01	2.350000000000000000e+01	3.110000000000000142e+01	2.469999999999999929e+01	5.650000000000000000e+01	5.600000000000000000e+01	6.550000000000000000e+01	3.500000000000000000e+01	6.420000000000000284e+01	2.610000000000000142e+01	4.629999999999999716e+01	6.579999999999999716e+01	2.489999999999999858e+01	6.200000000000000000e+01	4.020000000000000284e+01	6.459999999999999432e+01	6.470000000000000284e+01	6.120000000000000284e+01	6.160000000000000142e+01	6.320000000000000284e+01	6.659999999999999432e+01	6.350000000000000000e+01	3.650000000000000000e+01
2.400000000000000000e+01	7.029999999999999716e+01	4.550000000000000000e+01	3.130000000000000071e+01	4.229999999999999716e+01	3.510000000000000142e+01	2.989999999999999858e+01	6.740000000000000568e+01	6.050000000000000000e+01	2.550000000000000000e+01	5.100000000000000000e+01	6.879999999999999716e+01	6.520000000000000284e+01	6.379999999999999716e+01	2.019999999999999929e+01	6.379999999999999716e+01	5.650000000000000000e+01	6.150000000000000000e+01	2.700000000000000000e+01	6.609999999999999432e+01	6.150000000000000000e+01	3.000000000000000000e+01	6.370000000000000284e+01	4.139999999999999858e+01	2.810000000000000142e+01	5.229999999999999716e+01	6.470000000000000284e+01	6.370000000000000284e+01	3.250000000000000000e+01	3.039999999999999858e+01	2.600000000000000000e+01	5.629999999999999716e+01	5.470000000000000284e+01	6.400000000000000000e+01	3.400000000000000000e+01	6.210000000000000142e+01	2.739999999999999858e+01	4.660000000000000142e+01	6.529999999999999716e+01	2.510000000000000142e+01	6.129999999999999716e+01	4.179999999999999716e+01	6.310000000000000142e+01	6.389999999999999858e+01	6.020000000000000284e+01	6.250000000000000000e+01	6.289999999999999858e+01	6.629999999999999716e+01	6.420000000000000284e+01	2.589999999999999858e+01
2.350000000000000000e+01	7.120000000000000284e+01	4.229999999999999716e+01	3.169999999999999929e+01	3.700000000000000000e+01	3.250000000000000000e+01	3.019999999999999929e+01	6.670000000000000284e+01	6.100000000000000000e+01	3.150000000000000000e+01	5.120000000000000284e+01	7.040000000000000568e+01	6.479999999999999716e+01	6.329999999999999716e+01	2.389999999999999858e+01	6.520000000000000284e+01	5.670000000000000284e+01	6.150000000000000000e+01	2.560000000000000142e+01	6.550000000000000000e+01	6.170000000000000284e+01	3.770000000000000284e+01	6.479999999999999716e+01	4.689999999999999858e+01	2.480000000000000071e+01	4.800000000000000000e+01	6.459999999999999432e+01	6.120000000000000284e+01	3.989999999999999858e+01	3.570000000000000284e+01	3.320000000000000284e+01	5.589999999999999858e+01	5.550000000000000000e+01	6.229999999999999716e+01	3.160000000000000142e+01	6.229999999999999716e+01	2.369999999999999929e+01	4.510000000000000142e+01	6.389999999999999858e+01	2.369999999999999929e+01	6.179999999999999716e+01	3.760000000000000142e+01	6.520000000000000284e+01	6.350000000000000000e+01	5.929999999999999716e+01	6.270000000000000284e+01	6.279999999999999716e+01	6.520000000000000284e+01	6.170000000000000284e+01	2.539999999999999858e+01
2.269999999999999929e+01	7.259999999999999432e+01	4.100000000000000000e+01	3.210000000000000142e+01	3.729999999999999716e+01	3.979999999999999716e+01	2.969999999999999929e+01	6.900000000000000000e+01	6.089999999999999858e+01	2.789999999999999858e+01	4.420000000000000284e+01	7.029999999999999716e+01	6.490000000000000568e+01	6.409999999999999432e+01	2.230000000000000071e+01	6.509999999999999432e+01	5.789999999999999858e+01	6.089999999999999858e+01	2.500000000000000000e+01	6.590000000000000568e+01	6.050000000000000000e+01	3.100000000000000000e+01	6.470000000000000284e+01	4.700000000000000000e+01	2.339999999999999858e+01	4.989999999999999858e+01	6.339999999999999858e+01	6.110000000000000142e+01	3.069999999999999929e+01	3.520000000000000284e+01	3.169999999999999929e+01	5.520000000000000284e+01	5.589999999999999858e+01	6.089999999999999858e+01	2.619999999999999929e+01	6.339999999999999858e+01	2.500000000000000000e+01	4.439999999999999858e+01	6.629999999999999716e+01	2.200000000000000000e+01	6.200000000000000000e+01	3.729999999999999716e+01	6.400000000000000000e+01	6.339999999999999858e+01	5.989999999999999858e+01	6.260000000000000142e+01	6.189999999999999858e+01	6.509999999999999432e+01	6.220000000000000284e+01	2.660000000000000142e+01
2.219999999999999929e+01	7.220000000000000284e+01	4.270000000000000284e+01	2.969999999999999929e+01	3.939999999999999858e+01	3.710000000000000142e+01	3.589999999999999858e+01	6.900000000000000000e+01	6.189999999999999858e+01	2.539999999999999858e+01	4.100000000000000000e+01	7.109999999999999432e+01	6.479999999999999716e+01	6.490000000000000568e+01	2.069999999999999929e+01	6.570000000000000284e+01	5.689999999999999858e+01	5.760000000000000142e+01	2.289999999999999858e+01	6.509999999999999432e+01	6.060000000000000142e+01	3.489999999999999858e+01	6.320000000000000284e+01	4.760000000000000142e+01	2.139999999999999858e+01	4.889999999999999858e+01	6.450000000000000000e+01	6.239999999999999858e+01	3.539999999999999858e+01	3.739999999999999858e+01	3.600000000000000000e+01	5.370000000000000284e+01	5.660000000000000142e+01	6.150000000000000000e+01	2.580000000000000071e+01	6.339999999999999858e+01	3.960000000000000142e+01	4.650000000000000000e+01	6.400000000000000000e+01	2.069999999999999929e+01	6.020000000000000284e+01	3.460000000000000142e+01	6.459999999999999432e+01	6.329999999999999716e+01	5.770000000000000284e+01	6.250000000000000000e+01	6.150000000000000000e+01	6.429999999999999716e+01	6.110000000000000142e+01	2.530000000000000071e+01
2.030000000000000071e+01	7.309999999999999432e+01	4.160000000000000142e+01	2.960000000000000142e+01	3.639999999999999858e+01	3.570000000000000284e+01	3.100000000000000000e+01	7.050000000000000000e+01	6.189999999999999858e+01	2.510000000000000142e+01	4.629999999999999716e+01	7.120000000000000284e+01	6.490000000000000568e+01	6.429999999999999716e+01	1.969999999999999929e+01	6.540000000000000568e+01	5.679999999999999716e+01	5.729999999999999716e+01	2.130000000000000071e+01	6.429999999999999716e+01	5.910000000000000142e+01	4.300000000000000000e+01	6.100000000000000000e+01	3.910000000000000142e+01	1.889999999999999858e+01	4.779999999999999716e+01	6.540000000000000568e+01	6.200000000000000000e+01	3.779999999999999716e+01	3.560000000000000142e+01	3.000000000000000000e+01	5.229999999999999716e+01	5.700000000000000000e+01	6.120000000000000284e+01	2.500000000000000000e+01	6.400000000000000000e+01	4.929999999999999716e+01	4.570000000000000284e+01	6.440000000000000568e+01	1.889999999999999858e+01	5.850000000000000000e+01	3.270000000000000284e+01	6.500000000000000000e+01	6.279999999999999716e+01	5.720000000000000284e+01	6.150000000000000000e+01	6.020000000000000284e+01	6.409999999999999432e+01	6.189999999999999858e+01	3.080000000000000071e+01
1.490000000000000036e+01	7.120000000000000284e+01	3.460000000000000142e+01	3.789999999999999858e+01	2.969999999999999929e+01	3.310000000000000142e+01	3.310000000000000142e+01	6.770000000000000284e+01	6.150000000000000000e+01	2.450000000000000000e+01	4.910000000000000142e+01	7.070000000000000284e+01	6.529999999999999716e+01	6.379999999999999716e+01	2.250000000000000000e+01	6.490000000000000568e+01	5.600000000000000000e+01	5.760000000000000142e+01	1.930000000000000071e+01	6.370000000000000284e+01	5.689999999999999858e+01	5.229999999999999716e+01	5.929999999999999716e+01	4.460000000000000142e+01	1.700000000000000000e+01	4.950000000000000000e+01	6.429999999999999716e+01	6.360000000000000142e+01	4.920000000000000284e+01	3.329999999999999716e+01	2.730000000000000071e+01	4.579999999999999716e+01	5.579999999999999716e+01	6.120000000000000284e+01	2.400000000000000000e+01	6.379999999999999716e+01	5.129999999999999716e+01	4.370000000000000284e+01	6.450000000000000000e+01	1.789999999999999858e+01	5.879999999999999716e+01	3.189999999999999858e+01	6.490000000000000568e+01	6.420000000000000284e+01	5.770000000000000284e+01	6.020000000000000284e+01	5.789999999999999858e+01	6.400000000000000000e+01	6.150000000000000000e+01	4.760000000000000142e+01
1.650000000000000000e+01	7.240000000000000568e+01	3.850000000000000000e+01	3.339999999999999858e+01	3.410000000000000142e+01	3.650000000000000000e+01	3.229999999999999716e+01	6.859999999999999432e+01	6.250000000000000000e+01	2.319999999999999929e+01	5.300000000000000000e+01	7.120000000000000284e+01	6.559999999999999432e+01	6.420000000000000284e+01	2.180000000000000071e+01	6.520000000000000284e+01	5.539999999999999858e+01	5.850000000000000000e+01	1.989999999999999858e+01	6.350000000000000000e+01	5.629999999999999716e+01	5.639999999999999858e+01	6.210000000000000142e+01	4.689999999999999858e+01	1.580000000000000071e+01	4.779999999999999716e+01	6.350000000000000000e+01	6.409999999999999432e+01	5.450000000000000000e+01	3.270000000000000284e+01	2.669999999999999929e+01	4.879999999999999716e+01	5.620000000000000284e+01	6.150000000000000000e+01	2.430000000000000071e+01	6.450000000000000000e+01	5.220000000000000284e+01	4.410000000000000142e+01	6.310000000000000142e+01	1.639999999999999858e+01	5.810000000000000142e+01	3.160000000000000142e+01	6.529999999999999716e+01	6.459999999999999432e+01	5.589999999999999858e+01	6.079999999999999716e+01	5.770000000000000284e+01	6.470000000000000284e+01	6.160000000000000142e+01	5.729999999999999716e+01
2.419999999999999929e+01	7.240000000000000568e+01	4.120000000000000284e+01	3.879999999999999716e+01	3.679999999999999716e+01	4.500000000000000000e+01	4.610000000000000142e+01	6.979999999999999716e+01	6.350000000000000000e+01	2.150000000000000000e+01	5.679999999999999716e+01	7.409999999999999432e+01	6.490000000000000568e+01	6.339999999999999858e+01	2.410000000000000142e+01	6.750000000000000000e+01	5.700000000000000000e+01	5.660000000000000142e+01	2.050000000000000000e+01	6.300000000000000000e+01	5.700000000000000000e+01	5.860000000000000142e+01	6.520000000000000284e+01	4.850000000000000000e+01	2.269999999999999929e+01	5.060000000000000142e+01	6.389999999999999858e+01	6.459999999999999432e+01	5.729999999999999716e+01	3.250000000000000000e+01	2.739999999999999858e+01	5.220000000000000284e+01	5.500000000000000000e+01	6.139999999999999858e+01	2.839999999999999858e+01	6.310000000000000142e+01	4.920000000000000284e+01	4.229999999999999716e+01	6.370000000000000284e+01	1.469999999999999929e+01	5.760000000000000142e+01	3.200000000000000000e+01	6.570000000000000284e+01	6.459999999999999432e+01	5.670000000000000284e+01	6.100000000000000000e+01	5.879999999999999716e+01	6.559999999999999432e+01	6.250000000000000000e+01	6.070000000000000284e+01
2.380000000000000071e+01	7.029999999999999716e+01	3.239999999999999858e+01	6.379999999999999716e+01	4.129999999999999716e+01	4.860000000000000142e+01	4.300000000000000000e+01	6.450000000000000000e+01	6.379999999999999716e+01	2.060000000000000142e+01	6.089999999999999858e+01	6.870000000000000284e+01	6.379999999999999716e+01	6.320000000000000284e+01	2.360000000000000142e+01	6.470000000000000284e+01	5.729999999999999716e+01	6.079999999999999716e+01	2.189999999999999858e+01	6.310000000000000142e+01	6.110000000000000142e+01	3.379999999999999716e+01	6.150000000000000000e+01	5.089999999999999858e+01	3.300000000000000000e+01	5.560000000000000142e+01	6.470000000000000284e+01	6.389999999999999858e+01	3.629999999999999716e+01	5.279999999999999716e+01	3.410000000000000142e+01	5.160000000000000142e+01	5.679999999999999716e+01	6.229999999999999716e+01	2.800000000000000000e+01	6.360000000000000142e+01	3.920000000000000284e+01	4.739999999999999858e+01	6.350000000000000000e+01	1.950000000000000000e+01	5.639999999999999858e+01	4.139999999999999858e+01	6.300000000000000000e+01	6.420000000000000284e+01	5.839999999999999858e+01	6.079999999999999716e+01	5.829999999999999716e+01	6.470000000000000284e+01	6.270000000000000284e+01	6.389999999999999858e+01
2.439999999999999858e+01	7.090000000000000568e+01	3.800000000000000000e+01	3.450000000000000000e+01	3.360000000000000142e+01	5.839999999999999858e+01	5.370000000000000284e+01	6.950000000000000000e+01	5.939999999999999858e+01	3.030000000000000071e+01	5.529999999999999716e+01	6.870000000000000284e+01	6.440000000000000568e+01	6.239999999999999858e+01	3.050000000000000000e+01	6.310000000000000142e+01	5.729999999999999716e+01	5.879999999999999716e+01	2.019999999999999929e+01	6.260000000000000142e+01	5.650000000000000000e+01	4.589999999999999858e+01	6.440000000000000568e+01	5.339999999999999858e+01	2.419999999999999929e+01	4.960000000000000142e+01	6.659999999999999432e+01	6.479999999999999716e+01	4.839999999999999858e+01	3.470000000000000284e+01	2.810000000000000142e+01	5.339999999999999858e+01	5.279999999999999716e+01	6.039999999999999858e+01	3.010000000000000142e+01	5.839999999999999858e+01	5.120000000000000284e+01	4.239999999999999858e+01	6.409999999999999432e+01	1.980000000000000071e+01	5.770000000000000284e+01	3.539999999999999858e+01	6.440000000000000568e+01	6.500000000000000000e+01	5.900000000000000000e+01	6.189999999999999858e+01	5.770000000000000284e+01	6.570000000000000284e+01	6.200000000000000000e+01	6.450000000000000000e+01
2.269999999999999929e+01	7.020000000000000284e+01	3.289999999999999858e+01	3.110000000000000142e+01	2.869999999999999929e+01	6.079999999999999716e+01	5.789999999999999858e+01	6.759999999999999432e+01	5.910000000000000142e+01	3.080000000000000071e+01	5.689999999999999858e+01	6.940000000000000568e+01	6.490000000000000568e+01	6.300000000000000000e+01	2.900000000000000000e+01	6.289999999999999858e+01	5.600000000000000000e+01	5.879999999999999716e+01	1.960000000000000142e+01	6.279999999999999716e+01	5.760000000000000142e+01	5.270000000000000284e+01	6.540000000000000568e+01	5.110000000000000142e+01	2.069999999999999929e+01	5.029999999999999716e+01	6.479999999999999716e+01	6.520000000000000284e+01	5.410000000000000142e+01	3.420000000000000284e+01	2.589999999999999858e+01	5.489999999999999858e+01	5.439999999999999858e+01	6.039999999999999858e+01	2.569999999999999929e+01	5.939999999999999858e+01	5.600000000000000000e+01	4.320000000000000284e+01	6.450000000000000000e+01	2.089999999999999858e+01	5.850000000000000000e+01	3.339999999999999858e+01	6.550000000000000000e+01	6.389999999999999858e+01	5.750000000000000000e+01	6.079999999999999716e+01	5.960000000000000142e+01	6.479999999999999716e+01	6.250000000000000000e+01	6.429999999999999716e+01
2.480000000000000071e+01	6.909999999999999432e+01	3.520000000000000284e+01	2.950000000000000000e+01	3.229999999999999716e+01	5.800000000000000000e+01	6.079999999999999716e+01	6.570000000000000284e+01	5.839999999999999858e+01	2.500000000000000000e+01	5.829999999999999716e+01	6.850000000000000000e+01	6.450000000000000000e+01	6.429999999999999716e+01	2.300000000000000000e+01	6.179999999999999716e+01	5.700000000000000000e+01	5.729999999999999716e+01	2.100000000000000000e+01	6.279999999999999716e+01	5.800000000000000000e+01	5.650000000000000000e+01	6.500000000000000000e+01	4.800000000000000000e+01	1.980000000000000071e+01	5.060000000000000142e+01	6.490000000000000568e+01	6.220000000000000284e+01	5.710000000000000142e+01	3.529999999999999716e+01	3.089999999999999858e+01	5.450000000000000000e+01	5.510000000000000142e+01	6.239999999999999858e+01	2.669999999999999929e+01	6.129999999999999716e+01	5.570000000000000284e+01	4.439999999999999858e+01	6.300000000000000000e+01	2.069999999999999929e+01	5.770000000000000284e+01	3.370000000000000284e+01	6.529999999999999716e+01	6.229999999999999716e+01	5.539999999999999858e+01	6.139999999999999858e+01	5.939999999999999858e+01	6.529999999999999716e+01	6.160000000000000142e+01	6.559999999999999432e+01
2.400000000000000000e+01	6.940000000000000568e+01	3.929999999999999716e+01	3.119999999999999929e+01	3.789999999999999858e+01	5.810000000000000142e+01	6.020000000000000284e+01	6.590000000000000568e+01	6.050000000000000000e+01	2.510000000000000142e+01	5.939999999999999858e+01	6.859999999999999432e+01	6.470000000000000284e+01	6.479999999999999716e+01	2.330000000000000071e+01	6.370000000000000284e+01	5.779999999999999716e+01	5.629999999999999716e+01	2.289999999999999858e+01	6.200000000000000000e+01	5.900000000000000000e+01	5.720000000000000284e+01	6.659999999999999432e+01	4.610000000000000142e+01	2.050000000000000000e+01	5.089999999999999858e+01	6.559999999999999432e+01	6.320000000000000284e+01	5.839999999999999858e+01	3.800000000000000000e+01	3.030000000000000071e+01	5.379999999999999716e+01	5.510000000000000142e+01	6.310000000000000142e+01	2.280000000000000071e+01	6.310000000000000142e+01	4.779999999999999716e+01	4.510000000000000142e+01	6.320000000000000284e+01	1.950000000000000000e+01	5.700000000000000000e+01	3.370000000000000284e+01	6.559999999999999432e+01	6.350000000000000000e+01	5.520000000000000284e+01	6.050000000000000000e+01	6.020000000000000284e+01	6.720000000000000284e+01	6.450000000000000000e+01	6.629999999999999716e+01
2.260000000000000142e+01	7.029999999999999716e+01	4.189999999999999858e+01	3.000000000000000000e+01	4.079999999999999716e+01	6.010000000000000142e+01	6.100000000000000000e+01	6.690000000000000568e+01	5.979999999999999716e+01	2.210000000000000142e+01	5.810000000000000142e+01	6.990000000000000568e+01	6.490000000000000568e+01	6.270000000000000284e+01	2.160000000000000142e+01	6.370000000000000284e+01	5.779999999999999716e+01	5.779999999999999716e+01	2.400000000000000000e+01	6.260000000000000142e+01	5.920000000000000284e+01	5.670000000000000284e+01	6.210000000000000142e+01	5.260000000000000142e+01	2.169999999999999929e+01	5.320000000000000284e+01	6.540000000000000568e+01	6.429999999999999716e+01	5.739999999999999858e+01	4.000000000000000000e+01	3.130000000000000071e+01	5.320000000000000284e+01	5.650000000000000000e+01	6.260000000000000142e+01	2.330000000000000071e+01	6.450000000000000000e+01	5.460000000000000142e+01	4.789999999999999858e+01	6.310000000000000142e+01	1.660000000000000142e+01	5.689999999999999858e+01	3.500000000000000000e+01	5.739999999999999858e+01	6.400000000000000000e+01	5.689999999999999858e+01	6.079999999999999716e+01	6.120000000000000284e+01	6.559999999999999432e+01	6.279999999999999716e+01	6.590000000000000568e+01
2.310000000000000142e+01	7.109999999999999432e+01	4.260000000000000142e+01	2.910000000000000142e+01	4.170000000000000284e+01	6.089999999999999858e+01	6.070000000000000284e+01	6.750000000000000000e+01	6.210000000000000142e+01	2.419999999999999929e+01	5.779999999999999716e+01	7.070000000000000284e+01	6.520000000000000284e+01	6.179999999999999716e+01	2.000000000000000000e+01	6.520000000000000284e+01	5.779999999999999716e+01	5.610000000000000142e+01	2.219999999999999929e+01	6.450000000000000000e+01	5.739999999999999858e+01	5.479999999999999716e+01	6.370000000000000284e+01	5.679999999999999716e+01	2.119999999999999929e+01	5.139999999999999858e+01	6.509999999999999432e+01	6.490000000000000568e+01	5.539999999999999858e+01	3.750000000000000000e+01	2.850000000000000000e+01	5.300000000000000000e+01	5.639999999999999858e+01	6.179999999999999716e+01	2.919999999999999929e+01	6.500000000000000000e+01	5.629999999999999716e+01	4.700000000000000000e+01	6.440000000000000568e+01	1.830000000000000071e+01	5.760000000000000142e+01	3.300000000000000000e+01	5.860000000000000142e+01	6.479999999999999716e+01	5.710000000000000142e+01	6.050000000000000000e+01	5.889999999999999858e+01	6.490000000000000568e+01	6.260000000000000142e+01	6.470000000000000284e+01
2.139999999999999858e+01	6.970000000000000284e+01	4.310000000000000142e+01	2.989999999999999858e+01	4.160000000000000142e+01	6.129999999999999716e+01	6.010000000000000142e+01	6.520000000000000284e+01	6.270000000000000284e+01	2.300000000000000000e+01	5.800000000000000000e+01	6.950000000000000000e+01	6.529999999999999716e+01	6.360000000000000142e+01	2.130000000000000071e+01	6.420000000000000284e+01	5.760000000000000142e+01	5.320000000000000284e+01	2.450000000000000000e+01	6.329999999999999716e+01	5.860000000000000142e+01	5.750000000000000000e+01	6.509999999999999432e+01	5.879999999999999716e+01	1.969999999999999929e+01	5.020000000000000284e+01	6.490000000000000568e+01	6.550000000000000000e+01	5.789999999999999858e+01	3.479999999999999716e+01	2.589999999999999858e+01	5.410000000000000142e+01	5.539999999999999858e+01	6.260000000000000142e+01	3.189999999999999858e+01	6.509999999999999432e+01	5.829999999999999716e+01	4.489999999999999858e+01	6.389999999999999858e+01	2.150000000000000000e+01	5.689999999999999858e+01	3.329999999999999716e+01	5.789999999999999858e+01	6.509999999999999432e+01	5.720000000000000284e+01	6.029999999999999716e+01	5.910000000000000142e+01	5.900000000000000000e+01	5.829999999999999716e+01	6.450000000000000000e+01
2.089999999999999858e+01	6.659999999999999432e+01	4.129999999999999716e+01	3.360000000000000142e+01	4.039999999999999858e+01	5.410000000000000142e+01	6.129999999999999716e+01	6.229999999999999716e+01	5.929999999999999716e+01	2.339999999999999858e+01	5.820000000000000284e+01	6.700000000000000000e+01	6.490000000000000568e+01	6.310000000000000142e+01	2.760000000000000142e+01	6.210000000000000142e+01	5.789999999999999858e+01	5.379999999999999716e+01	2.569999999999999929e+01	6.039999999999999858e+01	5.810000000000000142e+01	5.729999999999999716e+01	6.409999999999999432e+01	5.939999999999999858e+01	2.400000000000000000e+01	5.370000000000000284e+01	6.470000000000000284e+01	6.420000000000000284e+01	5.760000000000000142e+01	3.639999999999999858e+01	2.910000000000000142e+01	5.300000000000000000e+01	5.439999999999999858e+01	6.300000000000000000e+01	2.980000000000000071e+01	6.289999999999999858e+01	6.060000000000000142e+01	4.560000000000000142e+01	6.200000000000000000e+01	2.210000000000000142e+01	5.420000000000000284e+01	3.839999999999999858e+01	6.329999999999999716e+01	6.440000000000000568e+01	5.370000000000000284e+01	5.989999999999999858e+01	5.889999999999999858e+01	6.220000000000000284e+01	5.979999999999999716e+01	6.529999999999999716e+01
2.289999999999999858e+01	6.550000000000000000e+01	4.129999999999999716e+01	3.080000000000000071e+01	4.160000000000000142e+01	5.610000000000000142e+01	6.279999999999999716e+01	6.020000000000000284e+01	5.979999999999999716e+01	2.339999999999999858e+01	5.760000000000000142e+01	6.490000000000000568e+01	6.490000000000000568e+01	6.459999999999999432e+01	2.580000000000000071e+01	6.210000000000000142e+01	6.160000000000000142e+01	5.410000000000000142e+01	2.869999999999999929e+01	6.100000000000000000e+01	5.589999999999999858e+01	5.610000000000000142e+01	6.579999999999999716e+01	6.120000000000000284e+01	4.129999999999999716e+01	5.739999999999999858e+01	6.540000000000000568e+01	6.450000000000000000e+01	5.679999999999999716e+01	4.010000000000000142e+01	3.439999999999999858e+01	5.260000000000000142e+01	5.800000000000000000e+01	6.370000000000000284e+01	3.400000000000000000e+01	6.320000000000000284e+01	5.889999999999999858e+01	4.779999999999999716e+01	6.229999999999999716e+01	2.180000000000000071e+01	5.400000000000000000e+01	4.600000000000000000e+01	6.210000000000000142e+01	6.500000000000000000e+01	5.479999999999999716e+01	5.929999999999999716e+01	5.600000000000000000e+01	6.559999999999999432e+01	6.229999999999999716e+01	6.529999999999999716e+01
2.389999999999999858e+01	6.720000000000000284e+01	4.270000000000000284e+01	4.110000000000000142e+01	4.229999999999999716e+01	5.920000000000000284e+01	6.210000000000000142e+01	6.220000000000000284e+01	5.939999999999999858e+01	2.319999999999999929e+01	5.529999999999999716e+01	6.500000000000000000e+01	6.459999999999999432e+01	6.609999999999999432e+01	2.860000000000000142e+01	6.170000000000000284e+01	6.289999999999999858e+01	5.389999999999999858e+01	3.600000000000000000e+01	6.160000000000000142e+01	5.539999999999999858e+01	5.639999999999999858e+01	6.600000000000000000e+01	6.010000000000000142e+01	5.070000000000000284e+01	6.100000000000000000e+01	6.559999999999999432e+01	6.450000000000000000e+01	5.670000000000000284e+01	3.710000000000000142e+01	3.119999999999999929e+01	5.170000000000000284e+01	6.050000000000000000e+01	6.150000000000000000e+01	3.550000000000000000e+01	6.370000000000000284e+01	5.739999999999999858e+01	4.870000000000000284e+01	6.250000000000000000e+01	2.380000000000000071e+01	5.439999999999999858e+01	5.460000000000000142e+01	6.440000000000000568e+01	6.470000000000000284e+01	5.639999999999999858e+01	5.979999999999999716e+01	5.570000000000000284e+01	6.479999999999999716e+01	6.260000000000000142e+01	6.590000000000000568e+01
2.410000000000000142e+01	6.590000000000000568e+01	4.379999999999999716e+01	3.670000000000000284e+01	4.270000000000000284e+01	6.089999999999999858e+01	6.210000000000000142e+01	6.200000000000000000e+01	5.960000000000000142e+01	2.139999999999999858e+01	5.310000000000000142e+01	6.400000000000000000e+01	6.459999999999999432e+01	6.629999999999999716e+01	3.060000000000000142e+01	6.139999999999999858e+01	6.339999999999999858e+01	5.389999999999999858e+01	4.750000000000000000e+01	6.139999999999999858e+01	5.350000000000000000e+01	5.610000000000000142e+01	6.409999999999999432e+01	6.089999999999999858e+01	5.700000000000000000e+01	6.289999999999999858e+01	6.500000000000000000e+01	6.429999999999999716e+01	5.739999999999999858e+01	3.700000000000000000e+01	3.110000000000000142e+01	5.139999999999999858e+01	6.070000000000000284e+01	6.079999999999999716e+01	3.589999999999999858e+01	6.260000000000000142e+01	5.750000000000000000e+01	5.220000000000000284e+01	6.070000000000000284e+01	2.560000000000000142e+01	5.350000000000000000e+01	5.929999999999999716e+01	6.609999999999999432e+01	6.440000000000000568e+01	5.610000000000000142e+01	5.839999999999999858e+01	5.350000000000000000e+01	6.559999999999999432e+01	6.260000000000000142e+01	6.609999999999999432e+01
2.300000000000000000e+01	6.650000000000000000e+01	4.439999999999999858e+01	4.289999999999999858e+01	4.420000000000000284e+01	6.060000000000000142e+01	5.960000000000000142e+01	6.150000000000000000e+01	6.079999999999999716e+01	2.780000000000000071e+01	5.389999999999999858e+01	6.540000000000000568e+01	6.450000000000000000e+01	6.409999999999999432e+01	3.060000000000000142e+01	6.210000000000000142e+01	6.459999999999999432e+01	5.310000000000000142e+01	5.410000000000000142e+01	6.050000000000000000e+01	5.270000000000000284e+01	5.589999999999999858e+01	6.389999999999999858e+01	6.129999999999999716e+01	5.900000000000000000e+01	6.379999999999999716e+01	6.529999999999999716e+01	6.329999999999999716e+01	5.660000000000000142e+01	3.850000000000000000e+01	3.130000000000000071e+01	5.200000000000000000e+01	6.100000000000000000e+01	6.200000000000000000e+01	3.620000000000000284e+01	6.329999999999999716e+01	5.600000000000000000e+01	5.410000000000000142e+01	6.029999999999999716e+01	2.680000000000000071e+01	5.220000000000000284e+01	6.150000000000000000e+01	6.650000000000000000e+01	6.310000000000000142e+01	5.429999999999999716e+01	5.870000000000000284e+01	5.310000000000000142e+01	6.629999999999999716e+01	6.239999999999999858e+01	6.590000000000000568e+01
2.210000000000000142e+01	6.650000000000000000e+01	4.779999999999999716e+01	4.529999999999999716e+01	4.679999999999999716e+01	6.210000000000000142e+01	6.060000000000000142e+01	6.050000000000000000e+01	6.039999999999999858e+01	2.660000000000000142e+01	5.460000000000000142e+01	6.579999999999999716e+01	6.479999999999999716e+01	6.329999999999999716e+01	3.729999999999999716e+01	6.210000000000000142e+01	6.520000000000000284e+01	5.289999999999999858e+01	5.739999999999999858e+01	5.910000000000000142e+01	5.170000000000000284e+01	5.360000000000000142e+01	6.409999999999999432e+01	6.179999999999999716e+01	6.029999999999999716e+01	6.420000000000000284e+01	6.450000000000000000e+01	6.370000000000000284e+01	5.410000000000000142e+01	3.820000000000000284e+01	2.950000000000000000e+01	4.960000000000000142e+01	6.229999999999999716e+01	6.139999999999999858e+01	3.620000000000000284e+01	6.260000000000000142e+01	5.500000000000000000e+01	5.489999999999999858e+01	6.089999999999999858e+01	2.810000000000000142e+01	4.960000000000000142e+01	6.239999999999999858e+01	6.350000000000000000e+01	6.479999999999999716e+01	5.389999999999999858e+01	5.900000000000000000e+01	5.220000000000000284e+01	6.459999999999999432e+01	6.189999999999999858e+01	6.579999999999999716e+01
2.169999999999999929e+01	6.540000000000000568e+01	4.620000000000000284e+01	4.089999999999999858e+01	4.570000000000000284e+01	6.229999999999999716e+01	6.079999999999999716e+01	5.879999999999999716e+01	5.989999999999999858e+01	2.939999999999999858e+01	5.510000000000000142e+01	6.620000000000000284e+01	6.459999999999999432e+01	6.420000000000000284e+01	3.989999999999999858e+01	6.229999999999999716e+01	6.420000000000000284e+01	5.270000000000000284e+01	5.829999999999999716e+01	6.029999999999999716e+01	4.960000000000000142e+01	5.189999999999999858e+01	6.600000000000000000e+01	6.120000000000000284e+01	6.010000000000000142e+01	6.470000000000000284e+01	6.570000000000000284e+01	6.400000000000000000e+01	5.279999999999999716e+01	3.439999999999999858e+01	2.539999999999999858e+01	4.850000000000000000e+01	6.050000000000000000e+01	6.479999999999999716e+01	3.550000000000000000e+01	5.950000000000000000e+01	4.470000000000000284e+01	5.260000000000000142e+01	6.170000000000000284e+01	2.569999999999999929e+01	5.260000000000000142e+01	6.260000000000000142e+01	6.089999999999999858e+01	6.420000000000000284e+01	5.220000000000000284e+01	5.900000000000000000e+01	5.079999999999999716e+01	6.590000000000000568e+01	6.450000000000000000e+01	6.389999999999999858e+01
2.369999999999999929e+01	6.339999999999999858e+01	4.439999999999999858e+01	4.250000000000000000e+01	4.470000000000000284e+01	6.250000000000000000e+01	6.110000000000000142e+01	5.750000000000000000e+01	5.979999999999999716e+01	3.370000000000000284e+01	5.479999999999999716e+01	6.420000000000000284e+01	6.470000000000000284e+01	6.459999999999999432e+01	3.710000000000000142e+01	6.079999999999999716e+01	6.440000000000000568e+01	5.329999999999999716e+01	5.929999999999999716e+01	5.900000000000000000e+01	4.929999999999999716e+01	5.179999999999999716e+01	6.150000000000000000e+01	5.879999999999999716e+01	5.939999999999999858e+01	6.490000000000000568e+01	6.570000000000000284e+01	6.429999999999999716e+01	5.350000000000000000e+01	3.139999999999999858e+01	2.350000000000000000e+01	4.789999999999999858e+01	6.100000000000000000e+01	6.479999999999999716e+01	3.429999999999999716e+01	5.839999999999999858e+01	3.360000000000000142e+01	5.720000000000000284e+01	6.079999999999999716e+01	3.500000000000000000e+01	5.250000000000000000e+01	6.239999999999999858e+01	5.920000000000000284e+01	6.360000000000000142e+01	5.160000000000000142e+01	5.860000000000000142e+01	5.079999999999999716e+01	6.520000000000000284e+01	6.450000000000000000e+01	6.370000000000000284e+01
2.289999999999999858e+01	6.409999999999999432e+01	4.460000000000000142e+01	4.820000000000000284e+01	4.479999999999999716e+01	6.509999999999999432e+01	6.179999999999999716e+01	5.810000000000000142e+01	6.020000000000000284e+01	4.000000000000000000e+01	5.250000000000000000e+01	6.360000000000000142e+01	6.400000000000000000e+01	6.400000000000000000e+01	4.070000000000000284e+01	6.120000000000000284e+01	6.500000000000000000e+01	5.239999999999999858e+01	6.020000000000000284e+01	5.810000000000000142e+01	4.950000000000000000e+01	5.100000000000000000e+01	6.329999999999999716e+01	6.139999999999999858e+01	5.920000000000000284e+01	6.459999999999999432e+01	6.600000000000000000e+01	6.270000000000000284e+01	5.070000000000000284e+01	2.869999999999999929e+01	2.100000000000000000e+01	4.929999999999999716e+01	6.060000000000000142e+01	6.229999999999999716e+01	3.589999999999999858e+01	6.039999999999999858e+01	2.839999999999999858e+01	5.729999999999999716e+01	5.920000000000000284e+01	4.429999999999999716e+01	5.350000000000000000e+01	6.189999999999999858e+01	6.310000000000000142e+01	6.329999999999999716e+01	5.139999999999999858e+01	5.829999999999999716e+01	5.050000000000000000e+01	6.529999999999999716e+01	6.350000000000000000e+01	6.420000000000000284e+01
2.230000000000000071e+01	6.379999999999999716e+01	4.400000000000000000e+01	4.989999999999999858e+01	4.479999999999999716e+01	6.350000000000000000e+01	5.920000000000000284e+01	5.860000000000000142e+01	5.850000000000000000e+01	4.270000000000000284e+01	5.310000000000000142e+01	6.459999999999999432e+01	6.409999999999999432e+01	6.370000000000000284e+01	4.350000000000000000e+01	6.000000000000000000e+01	6.459999999999999432e+01	5.410000000000000142e+01	6.029999999999999716e+01	5.810000000000000142e+01	4.950000000000000000e+01	3.760000000000000142e+01	6.329999999999999716e+01	6.089999999999999858e+01	5.960000000000000142e+01	6.470000000000000284e+01	6.500000000000000000e+01	6.339999999999999858e+01	3.870000000000000284e+01	2.910000000000000142e+01	2.850000000000000000e+01	5.070000000000000284e+01	6.000000000000000000e+01	6.229999999999999716e+01	3.900000000000000000e+01	6.089999999999999858e+01	1.969999999999999929e+01	6.070000000000000284e+01	5.929999999999999716e+01	5.460000000000000142e+01	5.439999999999999858e+01	6.229999999999999716e+01	6.529999999999999716e+01	6.400000000000000000e+01	5.200000000000000000e+01	5.800000000000000000e+01	5.120000000000000284e+01	6.420000000000000284e+01	6.250000000000000000e+01	6.400000000000000000e+01
2.180000000000000071e+01	6.310000000000000142e+01	4.310000000000000142e+01	5.100000000000000000e+01	4.429999999999999716e+01	6.250000000000000000e+01	6.029999999999999716e+01	5.920000000000000284e+01	5.879999999999999716e+01	5.039999999999999858e+01	5.339999999999999858e+01	6.360000000000000142e+01	6.429999999999999716e+01	6.289999999999999858e+01	4.429999999999999716e+01	6.029999999999999716e+01	6.490000000000000568e+01	5.160000000000000142e+01	6.110000000000000142e+01	6.029999999999999716e+01	5.139999999999999858e+01	3.119999999999999929e+01	6.310000000000000142e+01	6.060000000000000142e+01	5.910000000000000142e+01	6.459999999999999432e+01	6.479999999999999716e+01	6.450000000000000000e+01	3.050000000000000000e+01	3.039999999999999858e+01	2.760000000000000142e+01	5.439999999999999858e+01	6.289999999999999858e+01	6.160000000000000142e+01	4.700000000000000000e+01	6.210000000000000142e+01	1.710000000000000142e+01	6.310000000000000142e+01	6.279999999999999716e+01	5.989999999999999858e+01	5.560000000000000142e+01	6.160000000000000142e+01	6.500000000000000000e+01	6.370000000000000284e+01	5.479999999999999716e+01	5.650000000000000000e+01	5.400000000000000000e+01	6.339999999999999858e+01	6.179999999999999716e+01	6.409999999999999432e+01
2.130000000000000071e+01	6.300000000000000000e+01	4.310000000000000142e+01	5.450000000000000000e+01	4.360000000000000142e+01	6.150000000000000000e+01	5.839999999999999858e+01	5.739999999999999858e+01	5.870000000000000284e+01	5.129999999999999716e+01	5.250000000000000000e+01	6.379999999999999716e+01	6.450000000000000000e+01	6.139999999999999858e+01	4.910000000000000142e+01	6.070000000000000284e+01	6.379999999999999716e+01	5.200000000000000000e+01	6.129999999999999716e+01	6.079999999999999716e+01	5.079999999999999716e+01	2.669999999999999929e+01	6.270000000000000284e+01	5.579999999999999716e+01	5.979999999999999716e+01	6.490000000000000568e+01	6.429999999999999716e+01	6.459999999999999432e+01	2.650000000000000000e+01	3.329999999999999716e+01	3.150000000000000000e+01	5.510000000000000142e+01	6.490000000000000568e+01	6.210000000000000142e+01	5.160000000000000142e+01	6.520000000000000284e+01	2.250000000000000000e+01	6.409999999999999432e+01	6.089999999999999858e+01	6.279999999999999716e+01	5.679999999999999716e+01	6.250000000000000000e+01	6.650000000000000000e+01	6.470000000000000284e+01	5.460000000000000142e+01	5.629999999999999716e+01	5.370000000000000284e+01	6.360000000000000142e+01	6.150000000000000000e+01	6.389999999999999858e+01
2.030000000000000071e+01	6.310000000000000142e+01	4.429999999999999716e+01	5.589999999999999858e+01	4.460000000000000142e+01	5.950000000000000000e+01	5.879999999999999716e+01	5.839999999999999858e+01	5.900000000000000000e+01	5.350000000000000000e+01	5.339999999999999858e+01	6.429999999999999716e+01	6.429999999999999716e+01	5.989999999999999858e+01	5.150000000000000000e+01	6.070000000000000284e+01	6.500000000000000000e+01	5.370000000000000284e+01	6.250000000000000000e+01	6.000000000000000000e+01	5.300000000000000000e+01	3.160000000000000142e+01	6.320000000000000284e+01	5.810000000000000142e+01	6.120000000000000284e+01	6.500000000000000000e+01	6.379999999999999716e+01	6.559999999999999432e+01	3.210000000000000142e+01	3.479999999999999716e+01	3.260000000000000142e+01	5.420000000000000284e+01	6.459999999999999432e+01	6.179999999999999716e+01	5.189999999999999858e+01	6.459999999999999432e+01	2.369999999999999929e+01	6.389999999999999858e+01	6.020000000000000284e+01	6.300000000000000000e+01	5.470000000000000284e+01	6.370000000000000284e+01	6.640000000000000568e+01	6.600000000000000000e+01	5.400000000000000000e+01	5.610000000000000142e+01	5.420000000000000284e+01	6.490000000000000568e+01	6.260000000000000142e+01	6.620000000000000284e+01
2.069999999999999929e+01	6.409999999999999432e+01	4.450000000000000000e+01	5.800000000000000000e+01	4.460000000000000142e+01	6.200000000000000000e+01	5.810000000000000142e+01	5.870000000000000284e+01	5.829999999999999716e+01	5.439999999999999858e+01	5.279999999999999716e+01	6.389999999999999858e+01	6.429999999999999716e+01	5.870000000000000284e+01	5.420000000000000284e+01	6.139999999999999858e+01	6.360000000000000142e+01	5.270000000000000284e+01	6.409999999999999432e+01	6.020000000000000284e+01	5.350000000000000000e+01	3.200000000000000000e+01	6.420000000000000284e+01	6.170000000000000284e+01	6.110000000000000142e+01	6.459999999999999432e+01	6.459999999999999432e+01	6.479999999999999716e+01	3.500000000000000000e+01	3.210000000000000142e+01	2.819999999999999929e+01	5.700000000000000000e+01	6.400000000000000000e+01	6.120000000000000284e+01	5.360000000000000142e+01	6.429999999999999716e+01	2.710000000000000142e+01	6.400000000000000000e+01	6.089999999999999858e+01	6.270000000000000284e+01	4.039999999999999858e+01	6.400000000000000000e+01	6.520000000000000284e+01	6.509999999999999432e+01	5.389999999999999858e+01	5.620000000000000284e+01	5.570000000000000284e+01	6.550000000000000000e+01	6.310000000000000142e+01	6.440000000000000568e+01
2.130000000000000071e+01	6.289999999999999858e+01	4.420000000000000284e+01	5.710000000000000142e+01	4.500000000000000000e+01	6.229999999999999716e+01	5.829999999999999716e+01	5.670000000000000284e+01	5.950000000000000000e+01	4.629999999999999716e+01	5.170000000000000284e+01	6.370000000000000284e+01	6.420000000000000284e+01	5.989999999999999858e+01	5.370000000000000284e+01	6.160000000000000142e+01	6.289999999999999858e+01	5.460000000000000142e+01	6.220000000000000284e+01	5.960000000000000142e+01	5.370000000000000284e+01	2.950000000000000000e+01	6.360000000000000142e+01	6.170000000000000284e+01	5.960000000000000142e+01	6.470000000000000284e+01	6.300000000000000000e+01	6.509999999999999432e+01	3.500000000000000000e+01	3.019999999999999929e+01	2.460000000000000142e+01	5.629999999999999716e+01	6.470000000000000284e+01	6.039999999999999858e+01	5.200000000000000000e+01	6.490000000000000568e+01	2.530000000000000071e+01	6.429999999999999716e+01	6.000000000000000000e+01	6.150000000000000000e+01	3.789999999999999858e+01	6.200000000000000000e+01	6.129999999999999716e+01	6.490000000000000568e+01	5.450000000000000000e+01	5.639999999999999858e+01	5.550000000000000000e+01	6.429999999999999716e+01	6.129999999999999716e+01	6.420000000000000284e+01
2.060000000000000142e+01	5.970000000000000284e+01	4.620000000000000284e+01	5.750000000000000000e+01	4.779999999999999716e+01	6.050000000000000000e+01	5.810000000000000142e+01	5.039999999999999858e+01	5.770000000000000284e+01	4.770000000000000284e+01	5.189999999999999858e+01	6.060000000000000142e+01	6.440000000000000568e+01	6.070000000000000284e+01	5.450000000000000000e+01	5.839999999999999858e+01	6.150000000000000000e+01	5.379999999999999716e+01	5.879999999999999716e+01	5.989999999999999858e+01	5.220000000000000284e+01	3.400000000000000000e+01	6.279999999999999716e+01	6.409999999999999432e+01	5.850000000000000000e+01	6.429999999999999716e+01	6.260000000000000142e+01	6.470000000000000284e+01	3.629999999999999716e+01	2.930000000000000071e+01	2.389999999999999858e+01	5.420000000000000284e+01	6.429999999999999716e+01	6.200000000000000000e+01	5.010000000000000142e+01	6.459999999999999432e+01	2.269999999999999929e+01	6.420000000000000284e+01	6.150000000000000000e+01	6.129999999999999716e+01	4.150000000000000000e+01	6.239999999999999858e+01	6.060000000000000142e+01	6.500000000000000000e+01	5.589999999999999858e+01	5.579999999999999716e+01	5.350000000000000000e+01	6.389999999999999858e+01	6.229999999999999716e+01	6.379999999999999716e+01
1.969999999999999929e+01	5.920000000000000284e+01	5.070000000000000284e+01	5.670000000000000284e+01	5.279999999999999716e+01	6.150000000000000000e+01	5.839999999999999858e+01	5.179999999999999716e+01	5.679999999999999716e+01	4.279999999999999716e+01	5.120000000000000284e+01	5.820000000000000284e+01	6.370000000000000284e+01	6.179999999999999716e+01	5.310000000000000142e+01	5.620000000000000284e+01	6.279999999999999716e+01	5.389999999999999858e+01	5.929999999999999716e+01	5.939999999999999858e+01	5.250000000000000000e+01	2.869999999999999929e+01	6.320000000000000284e+01	6.400000000000000000e+01	5.850000000000000000e+01	6.470000000000000284e+01	6.429999999999999716e+01	6.479999999999999716e+01	3.310000000000000142e+01	3.030000000000000071e+01	2.519999999999999929e+01	5.300000000000000000e+01	6.389999999999999858e+01	6.150000000000000000e+01	4.679999999999999716e+01	6.470000000000000284e+01	2.160000000000000142e+01	6.459999999999999432e+01	6.060000000000000142e+01	6.320000000000000284e+01	4.979999999999999716e+01	6.139999999999999858e+01	6.160000000000000142e+01	6.500000000000000000e+01	5.170000000000000284e+01	5.610000000000000142e+01	5.439999999999999858e+01	6.289999999999999858e+01	6.170000000000000284e+01	6.360000000000000142e+01
2.180000000000000071e+01	6.210000000000000142e+01	4.629999999999999716e+01	5.550000000000000000e+01	4.829999999999999716e+01	5.760000000000000142e+01	5.760000000000000142e+01	5.539999999999999858e+01	5.610000000000000142e+01	4.129999999999999716e+01	5.160000000000000142e+01	5.879999999999999716e+01	6.389999999999999858e+01	6.029999999999999716e+01	5.129999999999999716e+01	5.570000000000000284e+01	6.250000000000000000e+01	5.560000000000000142e+01	6.050000000000000000e+01	5.860000000000000142e+01	5.279999999999999716e+01	3.400000000000000000e+01	6.339999999999999858e+01	6.440000000000000568e+01	5.970000000000000284e+01	6.470000000000000284e+01	6.420000000000000284e+01	6.420000000000000284e+01	3.700000000000000000e+01	2.810000000000000142e+01	2.400000000000000000e+01	5.429999999999999716e+01	6.470000000000000284e+01	6.150000000000000000e+01	5.039999999999999858e+01	6.509999999999999432e+01	2.080000000000000071e+01	6.470000000000000284e+01	5.989999999999999858e+01	6.450000000000000000e+01	5.450000000000000000e+01	6.229999999999999716e+01	6.360000000000000142e+01	6.490000000000000568e+01	5.150000000000000000e+01	5.670000000000000284e+01	5.420000000000000284e+01	6.379999999999999716e+01	6.220000000000000284e+01	6.379999999999999716e+01
2.639999999999999858e+01	6.370000000000000284e+01	4.389999999999999858e+01	5.520000000000000284e+01	4.189999999999999858e+01	5.760000000000000142e+01	5.029999999999999716e+01	5.900000000000000000e+01	5.910000000000000142e+01	3.829999999999999716e+01	5.160000000000000142e+01	6.110000000000000142e+01	6.379999999999999716e+01	5.979999999999999716e+01	5.200000000000000000e+01	5.910000000000000142e+01	6.379999999999999716e+01	5.550000000000000000e+01	6.350000000000000000e+01	5.850000000000000000e+01	5.529999999999999716e+01	2.669999999999999929e+01	6.329999999999999716e+01	6.529999999999999716e+01	6.020000000000000284e+01	6.479999999999999716e+01	6.229999999999999716e+01	6.440000000000000568e+01	2.800000000000000000e+01	2.910000000000000142e+01	2.150000000000000000e+01	5.820000000000000284e+01	6.400000000000000000e+01	5.929999999999999716e+01	5.420000000000000284e+01	6.559999999999999432e+01	2.100000000000000000e+01	6.450000000000000000e+01	5.950000000000000000e+01	6.479999999999999716e+01	5.579999999999999716e+01	6.379999999999999716e+01	6.520000000000000284e+01	6.470000000000000284e+01	5.189999999999999858e+01	5.660000000000000142e+01	5.639999999999999858e+01	6.220000000000000284e+01	6.120000000000000284e+01	6.310000000000000142e+01
2.580000000000000071e+01	6.329999999999999716e+01	4.239999999999999858e+01	5.579999999999999716e+01	4.120000000000000284e+01	5.789999999999999858e+01	4.170000000000000284e+01	5.839999999999999858e+01	5.770000000000000284e+01	3.720000000000000284e+01	5.300000000000000000e+01	6.239999999999999858e+01	6.409999999999999432e+01	6.160000000000000142e+01	5.350000000000000000e+01	5.879999999999999716e+01	6.400000000000000000e+01	5.460000000000000142e+01	6.339999999999999858e+01	5.989999999999999858e+01	5.589999999999999858e+01	2.630000000000000071e+01	6.170000000000000284e+01	6.459999999999999432e+01	6.050000000000000000e+01	6.470000000000000284e+01	6.160000000000000142e+01	6.500000000000000000e+01	2.800000000000000000e+01	2.950000000000000000e+01	2.710000000000000142e+01	5.620000000000000284e+01	6.440000000000000568e+01	5.970000000000000284e+01	5.160000000000000142e+01	6.540000000000000568e+01	1.939999999999999858e+01	6.350000000000000000e+01	5.960000000000000142e+01	6.020000000000000284e+01	5.529999999999999716e+01	6.320000000000000284e+01	6.600000000000000000e+01	6.550000000000000000e+01	5.229999999999999716e+01	5.729999999999999716e+01	5.689999999999999858e+01	6.229999999999999716e+01	6.070000000000000284e+01	6.360000000000000142e+01
2.750000000000000000e+01	6.129999999999999716e+01	4.339999999999999858e+01	5.650000000000000000e+01	4.379999999999999716e+01	5.879999999999999716e+01	4.029999999999999716e+01	5.600000000000000000e+01	5.679999999999999716e+01	3.189999999999999858e+01	5.060000000000000142e+01	6.089999999999999858e+01	6.370000000000000284e+01	6.160000000000000142e+01	5.210000000000000142e+01	5.850000000000000000e+01	6.429999999999999716e+01	5.360000000000000142e+01	6.120000000000000284e+01	6.179999999999999716e+01	5.510000000000000142e+01	3.520000000000000284e+01	6.329999999999999716e+01	6.470000000000000284e+01	6.060000000000000142e+01	6.490000000000000568e+01	6.339999999999999858e+01	6.500000000000000000e+01	3.460000000000000142e+01	3.339999999999999858e+01	2.800000000000000000e+01	5.370000000000000284e+01	6.350000000000000000e+01	6.110000000000000142e+01	4.460000000000000142e+01	6.459999999999999432e+01	1.800000000000000000e+01	6.400000000000000000e+01	6.170000000000000284e+01	6.289999999999999858e+01	5.650000000000000000e+01	6.350000000000000000e+01	6.590000000000000568e+01	6.509999999999999432e+01	5.229999999999999716e+01	5.839999999999999858e+01	5.620000000000000284e+01	6.170000000000000284e+01	6.050000000000000000e+01	6.220000000000000284e+01
2.850000000000000000e+01	6.160000000000000142e+01	4.750000000000000000e+01	5.520000000000000284e+01	5.000000000000000000e+01	5.779999999999999716e+01	4.450000000000000000e+01	5.729999999999999716e+01	5.610000000000000142e+01	3.579999999999999716e+01	4.920000000000000284e+01	6.039999999999999858e+01	6.350000000000000000e+01	6.160000000000000142e+01	5.060000000000000142e+01	5.789999999999999858e+01	6.389999999999999858e+01	5.210000000000000142e+01	5.989999999999999858e+01	5.939999999999999858e+01	5.310000000000000142e+01	2.680000000000000071e+01	6.010000000000000142e+01	6.429999999999999716e+01	6.120000000000000284e+01	6.479999999999999716e+01	6.360000000000000142e+01	6.500000000000000000e+01	2.619999999999999929e+01	3.300000000000000000e+01	2.489999999999999858e+01	5.139999999999999858e+01	6.210000000000000142e+01	6.039999999999999858e+01	4.500000000000000000e+01	6.379999999999999716e+01	2.510000000000000142e+01	6.379999999999999716e+01	5.879999999999999716e+01	6.100000000000000000e+01	5.779999999999999716e+01	6.310000000000000142e+01	6.590000000000000568e+01	6.520000000000000284e+01	5.170000000000000284e+01	5.739999999999999858e+01	5.320000000000000284e+01	6.250000000000000000e+01	6.100000000000000000e+01	6.420000000000000284e+01
3.220000000000000284e+01	6.160000000000000142e+01	4.810000000000000142e+01	5.579999999999999716e+01	5.179999999999999716e+01	5.810000000000000142e+01	5.160000000000000142e+01	5.650000000000000000e+01	5.600000000000000000e+01	4.420000000000000284e+01	5.250000000000000000e+01	6.089999999999999858e+01	6.400000000000000000e+01	5.860000000000000142e+01	5.200000000000000000e+01	5.739999999999999858e+01	6.210000000000000142e+01	5.329999999999999716e+01	6.060000000000000142e+01	5.920000000000000284e+01	5.120000000000000284e+01	3.500000000000000000e+01	5.960000000000000142e+01	6.479999999999999716e+01	6.029999999999999716e+01	6.490000000000000568e+01	6.409999999999999432e+01	6.440000000000000568e+01	3.689999999999999858e+01	3.189999999999999858e+01	2.550000000000000000e+01	5.010000000000000142e+01	6.060000000000000142e+01	5.739999999999999858e+01	3.839999999999999858e+01	6.270000000000000284e+01	2.669999999999999929e+01	6.329999999999999716e+01	5.929999999999999716e+01	5.170000000000000284e+01	5.839999999999999858e+01	6.220000000000000284e+01	6.329999999999999716e+01	6.509999999999999432e+01	5.329999999999999716e+01	5.510000000000000142e+01	5.000000000000000000e+01	6.150000000000000000e+01	6.050000000000000000e+01	6.409999999999999432e+01
3.929999999999999716e+01	6.270000000000000284e+01	5.010000000000000142e+01	5.570000000000000284e+01	5.389999999999999858e+01	5.800000000000000000e+01	5.460000000000000142e+01	5.700000000000000000e+01	5.579999999999999716e+01	4.500000000000000000e+01	5.429999999999999716e+01	6.110000000000000142e+01	6.339999999999999858e+01	5.800000000000000000e+01	5.089999999999999858e+01	5.670000000000000284e+01	6.229999999999999716e+01	5.020000000000000284e+01	6.060000000000000142e+01	5.989999999999999858e+01	4.660000000000000142e+01	4.379999999999999716e+01	6.129999999999999716e+01	4.820000000000000284e+01	5.889999999999999858e+01	6.479999999999999716e+01	6.389999999999999858e+01	6.479999999999999716e+01	4.379999999999999716e+01	3.089999999999999858e+01	2.260000000000000142e+01	4.939999999999999858e+01	6.050000000000000000e+01	5.810000000000000142e+01	3.529999999999999716e+01	5.989999999999999858e+01	2.530000000000000071e+01	6.379999999999999716e+01	5.939999999999999858e+01	4.800000000000000000e+01	5.839999999999999858e+01	6.120000000000000284e+01	6.509999999999999432e+01	6.529999999999999716e+01	5.400000000000000000e+01	5.300000000000000000e+01	4.770000000000000284e+01	6.170000000000000284e+01	6.050000000000000000e+01	6.370000000000000284e+01
4.950000000000000000e+01	6.289999999999999858e+01	5.070000000000000284e+01	5.439999999999999858e+01	5.539999999999999858e+01	5.989999999999999858e+01	5.620000000000000284e+01	5.729999999999999716e+01	5.700000000000000000e+01	5.170000000000000284e+01	4.870000000000000284e+01	6.220000000000000284e+01	6.360000000000000142e+01	6.010000000000000142e+01	5.000000000000000000e+01	5.829999999999999716e+01	5.439999999999999858e+01	4.660000000000000142e+01	5.950000000000000000e+01	5.929999999999999716e+01	4.820000000000000284e+01	3.960000000000000142e+01	6.189999999999999858e+01	5.750000000000000000e+01	5.750000000000000000e+01	6.470000000000000284e+01	6.150000000000000000e+01	6.420000000000000284e+01	3.560000000000000142e+01	2.910000000000000142e+01	2.239999999999999858e+01	4.760000000000000142e+01	6.020000000000000284e+01	5.929999999999999716e+01	3.429999999999999716e+01	6.120000000000000284e+01	2.450000000000000000e+01	6.289999999999999858e+01	5.900000000000000000e+01	4.270000000000000284e+01	5.710000000000000142e+01	6.050000000000000000e+01	6.409999999999999432e+01	6.509999999999999432e+01	5.350000000000000000e+01	3.860000000000000142e+01	4.879999999999999716e+01	6.350000000000000000e+01	6.189999999999999858e+01	6.400000000000000000e+01
5.629999999999999716e+01	6.260000000000000142e+01	5.270000000000000284e+01	5.429999999999999716e+01	5.220000000000000284e+01	6.100000000000000000e+01	5.750000000000000000e+01	5.770000000000000284e+01	5.800000000000000000e+01	4.510000000000000142e+01	5.179999999999999716e+01	6.160000000000000142e+01	6.350000000000000000e+01	6.029999999999999716e+01	5.120000000000000284e+01	5.889999999999999858e+01	5.260000000000000142e+01	4.879999999999999716e+01	6.110000000000000142e+01	5.620000000000000284e+01	4.870000000000000284e+01	4.860000000000000142e+01	6.189999999999999858e+01	6.139999999999999858e+01	5.939999999999999858e+01	6.470000000000000284e+01	6.200000000000000000e+01	6.139999999999999858e+01	4.689999999999999858e+01	2.989999999999999858e+01	2.330000000000000071e+01	4.770000000000000284e+01	6.020000000000000284e+01	6.150000000000000000e+01	3.279999999999999716e+01	6.100000000000000000e+01	2.160000000000000142e+01	6.420000000000000284e+01	5.870000000000000284e+01	4.570000000000000284e+01	5.800000000000000000e+01	6.139999999999999858e+01	6.509999999999999432e+01	6.350000000000000000e+01	4.889999999999999858e+01	3.739999999999999858e+01	5.020000000000000284e+01	6.329999999999999716e+01	6.139999999999999858e+01	6.429999999999999716e+01
5.960000000000000142e+01	6.479999999999999716e+01	5.300000000000000000e+01	5.489999999999999858e+01	5.379999999999999716e+01	6.139999999999999858e+01	5.829999999999999716e+01	5.960000000000000142e+01	5.829999999999999716e+01	4.529999999999999716e+01	5.239999999999999858e+01	6.320000000000000284e+01	6.370000000000000284e+01	6.110000000000000142e+01	5.150000000000000000e+01	5.910000000000000142e+01	5.679999999999999716e+01	5.070000000000000284e+01	6.329999999999999716e+01	5.500000000000000000e+01	4.850000000000000000e+01	5.379999999999999716e+01	6.229999999999999716e+01	6.270000000000000284e+01	6.060000000000000142e+01	6.500000000000000000e+01	6.229999999999999716e+01	6.170000000000000284e+01	5.370000000000000284e+01	2.850000000000000000e+01	2.280000000000000071e+01	4.829999999999999716e+01	6.160000000000000142e+01	5.989999999999999858e+01	3.570000000000000284e+01	6.220000000000000284e+01	2.930000000000000071e+01	6.490000000000000568e+01	5.770000000000000284e+01	5.379999999999999716e+01	5.760000000000000142e+01	6.250000000000000000e+01	6.470000000000000284e+01	6.339999999999999858e+01	4.620000000000000284e+01	4.200000000000000000e+01	5.060000000000000142e+01	6.370000000000000284e+01	6.229999999999999716e+01	6.440000000000000568e+01
5.960000000000000142e+01	6.529999999999999716e+01	4.979999999999999716e+01	5.489999999999999858e+01	5.270000000000000284e+01	6.189999999999999858e+01	5.910000000000000142e+01	5.970000000000000284e+01	5.839999999999999858e+01	4.420000000000000284e+01	5.360000000000000142e+01	6.089999999999999858e+01	6.339999999999999858e+01	6.379999999999999716e+01	5.050000000000000000e+01	6.020000000000000284e+01	6.070000000000000284e+01	5.089999999999999858e+01	6.139999999999999858e+01	5.529999999999999716e+01	4.970000000000000284e+01	5.510000000000000142e+01	6.310000000000000142e+01	6.429999999999999716e+01	6.100000000000000000e+01	6.500000000000000000e+01	6.270000000000000284e+01	6.310000000000000142e+01	5.410000000000000142e+01	2.839999999999999858e+01	2.150000000000000000e+01	5.020000000000000284e+01	6.129999999999999716e+01	5.960000000000000142e+01	3.820000000000000284e+01	6.200000000000000000e+01	3.529999999999999716e+01	6.479999999999999716e+01	5.700000000000000000e+01	5.529999999999999716e+01	5.839999999999999858e+01	6.279999999999999716e+01	6.179999999999999716e+01	6.339999999999999858e+01	4.700000000000000000e+01	4.920000000000000284e+01	5.120000000000000284e+01	6.320000000000000284e+01	6.189999999999999858e+01	6.479999999999999716e+01
6.020000000000000284e+01	6.100000000000000000e+01	5.189999999999999858e+01	5.570000000000000284e+01	5.500000000000000000e+01	6.029999999999999716e+01	6.050000000000000000e+01	5.560000000000000142e+01	5.779999999999999716e+01	4.289999999999999858e+01	5.510000000000000142e+01	6.079999999999999716e+01	6.379999999999999716e+01	6.400000000000000000e+01	5.210000000000000142e+01	5.889999999999999858e+01	6.039999999999999858e+01	5.070000000000000284e+01	6.270000000000000284e+01	5.570000000000000284e+01	5.179999999999999716e+01	5.560000000000000142e+01	6.270000000000000284e+01	6.529999999999999716e+01	6.050000000000000000e+01	6.509999999999999432e+01	6.150000000000000000e+01	6.370000000000000284e+01	5.639999999999999858e+01	3.389999999999999858e+01	3.100000000000000000e+01	5.179999999999999716e+01	6.289999999999999858e+01	5.900000000000000000e+01	3.910000000000000142e+01	6.400000000000000000e+01	3.370000000000000284e+01	6.529999999999999716e+01	5.739999999999999858e+01	6.050000000000000000e+01	5.800000000000000000e+01	6.279999999999999716e+01	6.029999999999999716e+01	6.409999999999999432e+01	4.860000000000000142e+01	5.120000000000000284e+01	5.270000000000000284e+01	6.220000000000000284e+01	6.110000000000000142e+01	6.570000000000000284e+01
6.029999999999999716e+01	5.970000000000000284e+01	5.189999999999999858e+01	5.600000000000000000e+01	5.500000000000000000e+01	6.229999999999999716e+01	6.120000000000000284e+01	5.470000000000000284e+01	5.529999999999999716e+01	3.910000000000000142e+01	5.370000000000000284e+01	6.020000000000000284e+01	6.350000000000000000e+01	6.470000000000000284e+01	5.389999999999999858e+01	5.789999999999999858e+01	5.739999999999999858e+01	5.429999999999999716e+01	6.339999999999999858e+01	5.739999999999999858e+01	5.200000000000000000e+01	5.689999999999999858e+01	6.179999999999999716e+01	6.609999999999999432e+01	6.010000000000000142e+01	6.509999999999999432e+01	6.129999999999999716e+01	6.500000000000000000e+01	5.810000000000000142e+01	3.550000000000000000e+01	3.229999999999999716e+01	5.289999999999999858e+01	6.329999999999999716e+01	5.850000000000000000e+01	4.070000000000000284e+01	6.429999999999999716e+01	4.410000000000000142e+01	6.490000000000000568e+01	5.860000000000000142e+01	6.279999999999999716e+01	5.839999999999999858e+01	6.320000000000000284e+01	6.239999999999999858e+01	6.550000000000000000e+01	5.110000000000000142e+01	4.450000000000000000e+01	5.329999999999999716e+01	6.200000000000000000e+01	6.000000000000000000e+01	6.459999999999999432e+01
6.039999999999999858e+01	5.960000000000000142e+01	5.210000000000000142e+01	5.589999999999999858e+01	5.650000000000000000e+01	6.020000000000000284e+01	5.910000000000000142e+01	5.489999999999999858e+01	5.470000000000000284e+01	3.650000000000000000e+01	5.239999999999999858e+01	5.879999999999999716e+01	6.389999999999999858e+01	6.559999999999999432e+01	5.289999999999999858e+01	5.600000000000000000e+01	5.610000000000000142e+01	5.239999999999999858e+01	6.350000000000000000e+01	5.610000000000000142e+01	5.289999999999999858e+01	5.829999999999999716e+01	6.160000000000000142e+01	6.379999999999999716e+01	6.110000000000000142e+01	6.540000000000000568e+01	6.170000000000000284e+01	6.420000000000000284e+01	5.910000000000000142e+01	3.900000000000000000e+01	3.410000000000000142e+01	5.589999999999999858e+01	6.550000000000000000e+01	5.970000000000000284e+01	4.829999999999999716e+01	6.559999999999999432e+01	5.289999999999999858e+01	6.540000000000000568e+01	6.050000000000000000e+01	6.420000000000000284e+01	5.789999999999999858e+01	6.300000000000000000e+01	6.179999999999999716e+01	6.479999999999999716e+01	4.889999999999999858e+01	4.310000000000000142e+01	5.470000000000000284e+01	6.200000000000000000e+01	5.939999999999999858e+01	6.450000000000000000e+01
6.039999999999999858e+01	5.950000000000000000e+01	5.320000000000000284e+01	5.639999999999999858e+01	5.760000000000000142e+01	6.260000000000000142e+01	5.989999999999999858e+01	5.420000000000000284e+01	5.400000000000000000e+01	3.870000000000000284e+01	5.150000000000000000e+01	5.860000000000000142e+01	6.389999999999999858e+01	6.220000000000000284e+01	5.439999999999999858e+01	5.589999999999999858e+01	5.750000000000000000e+01	5.289999999999999858e+01	6.029999999999999716e+01	5.479999999999999716e+01	5.250000000000000000e+01	5.779999999999999716e+01	6.220000000000000284e+01	6.160000000000000142e+01	6.070000000000000284e+01	6.540000000000000568e+01	6.170000000000000284e+01	6.450000000000000000e+01	5.810000000000000142e+01	4.050000000000000000e+01	3.579999999999999716e+01	5.550000000000000000e+01	6.509999999999999432e+01	5.900000000000000000e+01	5.070000000000000284e+01	6.559999999999999432e+01	5.610000000000000142e+01	6.570000000000000284e+01	5.860000000000000142e+01	6.450000000000000000e+01	5.860000000000000142e+01	6.320000000000000284e+01	6.360000000000000142e+01	6.570000000000000284e+01	4.679999999999999716e+01	4.800000000000000000e+01	5.400000000000000000e+01	6.260000000000000142e+01	5.970000000000000284e+01	6.450000000000000000e+01
6.150000000000000000e+01	6.039999999999999858e+01	5.170000000000000284e+01	5.789999999999999858e+01	5.460000000000000142e+01	6.210000000000000142e+01	5.970000000000000284e+01	5.700000000000000000e+01	5.710000000000000142e+01	3.410000000000000142e+01	5.210000000000000142e+01	6.039999999999999858e+01	6.370000000000000284e+01	6.250000000000000000e+01	5.510000000000000142e+01	5.800000000000000000e+01	6.010000000000000142e+01	5.279999999999999716e+01	6.020000000000000284e+01	5.570000000000000284e+01	5.350000000000000000e+01	5.920000000000000284e+01	6.260000000000000142e+01	6.170000000000000284e+01	6.020000000000000284e+01	6.509999999999999432e+01	6.279999999999999716e+01	6.389999999999999858e+01	5.820000000000000284e+01	4.100000000000000000e+01	3.710000000000000142e+01	5.439999999999999858e+01	6.529999999999999716e+01	6.110000000000000142e+01	4.939999999999999858e+01	6.529999999999999716e+01	5.810000000000000142e+01	6.520000000000000284e+01	5.889999999999999858e+01	6.440000000000000568e+01	5.889999999999999858e+01	6.279999999999999716e+01	6.409999999999999432e+01	6.540000000000000568e+01	4.660000000000000142e+01	5.429999999999999716e+01	5.629999999999999716e+01	6.409999999999999432e+01	6.189999999999999858e+01	6.440000000000000568e+01
6.260000000000000142e+01	6.120000000000000284e+01	5.110000000000000142e+01	5.489999999999999858e+01	5.520000000000000284e+01	5.289999999999999858e+01	5.750000000000000000e+01	5.689999999999999858e+01	5.810000000000000142e+01	3.420000000000000284e+01	5.139999999999999858e+01	6.120000000000000284e+01	6.379999999999999716e+01	6.279999999999999716e+01	5.189999999999999858e+01	5.889999999999999858e+01	6.229999999999999716e+01	5.389999999999999858e+01	6.089999999999999858e+01	5.660000000000000142e+01	5.260000000000000142e+01	5.960000000000000142e+01	6.289999999999999858e+01	6.179999999999999716e+01	6.050000000000000000e+01	6.550000000000000000e+01	6.320000000000000284e+01	6.479999999999999716e+01	5.910000000000000142e+01	4.739999999999999858e+01	4.479999999999999716e+01	5.550000000000000000e+01	6.479999999999999716e+01	6.100000000000000000e+01	5.229999999999999716e+01	6.609999999999999432e+01	6.000000000000000000e+01	6.559999999999999432e+01	6.079999999999999716e+01	6.409999999999999432e+01	5.960000000000000142e+01	6.350000000000000000e+01	6.540000000000000568e+01	6.570000000000000284e+01	4.820000000000000284e+01	5.650000000000000000e+01	5.410000000000000142e+01	6.350000000000000000e+01	6.200000000000000000e+01	6.329999999999999716e+01
6.420000000000000284e+01	6.110000000000000142e+01	5.000000000000000000e+01	5.420000000000000284e+01	5.220000000000000284e+01	4.329999999999999716e+01	5.900000000000000000e+01	5.729999999999999716e+01	5.800000000000000000e+01	4.339999999999999858e+01	5.379999999999999716e+01	6.160000000000000142e+01	6.400000000000000000e+01	6.250000000000000000e+01	5.060000000000000142e+01	5.929999999999999716e+01	6.170000000000000284e+01	5.360000000000000142e+01	6.210000000000000142e+01	5.800000000000000000e+01	5.329999999999999716e+01	5.939999999999999858e+01	6.170000000000000284e+01	4.770000000000000284e+01	6.010000000000000142e+01	6.500000000000000000e+01	6.389999999999999858e+01	6.579999999999999716e+01	5.970000000000000284e+01	5.110000000000000142e+01	4.860000000000000142e+01	5.850000000000000000e+01	6.529999999999999716e+01	6.110000000000000142e+01	5.620000000000000284e+01	6.520000000000000284e+01	6.010000000000000142e+01	6.450000000000000000e+01	6.110000000000000142e+01	6.529999999999999716e+01	5.900000000000000000e+01	6.329999999999999716e+01	6.650000000000000000e+01	6.570000000000000284e+01	5.060000000000000142e+01	5.610000000000000142e+01	5.600000000000000000e+01	6.260000000000000142e+01	6.120000000000000284e+01	6.440000000000000568e+01
6.420000000000000284e+01	6.300000000000000000e+01	4.889999999999999858e+01	5.370000000000000284e+01	5.050000000000000000e+01	3.279999999999999716e+01	5.870000000000000284e+01	5.779999999999999716e+01	5.839999999999999858e+01	4.829999999999999716e+01	5.320000000000000284e+01	6.250000000000000000e+01	6.400000000000000000e+01	6.389999999999999858e+01	5.089999999999999858e+01	5.960000000000000142e+01	6.379999999999999716e+01	5.400000000000000000e+01	6.010000000000000142e+01	5.920000000000000284e+01	5.400000000000000000e+01	5.950000000000000000e+01	6.289999999999999858e+01	5.550000000000000000e+01	5.960000000000000142e+01	6.500000000000000000e+01	6.379999999999999716e+01	6.600000000000000000e+01	6.029999999999999716e+01	5.310000000000000142e+01	5.150000000000000000e+01	5.720000000000000284e+01	6.550000000000000000e+01	6.300000000000000000e+01	5.150000000000000000e+01	6.500000000000000000e+01	6.050000000000000000e+01	6.450000000000000000e+01	6.110000000000000142e+01	6.470000000000000284e+01	5.960000000000000142e+01	6.270000000000000284e+01	6.100000000000000000e+01	6.600000000000000000e+01	5.139999999999999858e+01	5.710000000000000142e+01	5.629999999999999716e+01	6.339999999999999858e+01	6.100000000000000000e+01	6.370000000000000284e+01
6.350000000000000000e+01	6.379999999999999716e+01	5.039999999999999858e+01	5.439999999999999858e+01	5.329999999999999716e+01	2.660000000000000142e+01	5.929999999999999716e+01	5.810000000000000142e+01	5.970000000000000284e+01	4.460000000000000142e+01	5.470000000000000284e+01	6.350000000000000000e+01	6.440000000000000568e+01	6.350000000000000000e+01	5.220000000000000284e+01	6.089999999999999858e+01	6.420000000000000284e+01	5.450000000000000000e+01	6.070000000000000284e+01	6.070000000000000284e+01	5.279999999999999716e+01	5.839999999999999858e+01	6.279999999999999716e+01	5.889999999999999858e+01	5.889999999999999858e+01	6.470000000000000284e+01	6.459999999999999432e+01	6.550000000000000000e+01	6.000000000000000000e+01	5.420000000000000284e+01	5.389999999999999858e+01	5.689999999999999858e+01	6.520000000000000284e+01	6.250000000000000000e+01	5.250000000000000000e+01	6.540000000000000568e+01	5.989999999999999858e+01	6.320000000000000284e+01	6.279999999999999716e+01	6.470000000000000284e+01	5.879999999999999716e+01	6.150000000000000000e+01	6.509999999999999432e+01	6.550000000000000000e+01	5.400000000000000000e+01	5.839999999999999858e+01	5.439999999999999858e+01	6.310000000000000142e+01	6.050000000000000000e+01	6.329999999999999716e+01
6.279999999999999716e+01	6.320000000000000284e+01	5.370000000000000284e+01	5.500000000000000000e+01	5.370000000000000284e+01	2.400000000000000000e+01	5.710000000000000142e+01	5.839999999999999858e+01	5.750000000000000000e+01	4.029999999999999716e+01	5.350000000000000000e+01	6.300000000000000000e+01	6.420000000000000284e+01	6.450000000000000000e+01	5.279999999999999716e+01	5.960000000000000142e+01	6.459999999999999432e+01	5.339999999999999858e+01	6.000000000000000000e+01	5.870000000000000284e+01	5.289999999999999858e+01	5.989999999999999858e+01	6.440000000000000568e+01	6.010000000000000142e+01	5.750000000000000000e+01	6.479999999999999716e+01	6.470000000000000284e+01	6.579999999999999716e+01	6.050000000000000000e+01	5.170000000000000284e+01	5.079999999999999716e+01	5.389999999999999858e+01	6.520000000000000284e+01	6.310000000000000142e+01	5.010000000000000142e+01	6.490000000000000568e+01	5.989999999999999858e+01	6.409999999999999432e+01	6.160000000000000142e+01	6.070000000000000284e+01	5.850000000000000000e+01	6.070000000000000284e+01	6.170000000000000284e+01	6.540000000000000568e+01	5.150000000000000000e+01	5.910000000000000142e+01	5.470000000000000284e+01	6.409999999999999432e+01	6.139999999999999858e+01	6.370000000000000284e+01
6.279999999999999716e+01	6.329999999999999716e+01	5.320000000000000284e+01	5.470000000000000284e+01	4.839999999999999858e+01	2.480000000000000071e+01	3.760000000000000142e+01	5.870000000000000284e+01	5.829999999999999716e+01	3.979999999999999716e+01	5.339999999999999858e+01	6.329999999999999716e+01	6.389999999999999858e+01	6.479999999999999716e+01	5.150000000000000000e+01	6.010000000000000142e+01	6.400000000000000000e+01	5.279999999999999716e+01	6.129999999999999716e+01	5.829999999999999716e+01	5.160000000000000142e+01	5.800000000000000000e+01	6.279999999999999716e+01	6.120000000000000284e+01	5.970000000000000284e+01	6.500000000000000000e+01	6.329999999999999716e+01	6.609999999999999432e+01	5.900000000000000000e+01	4.860000000000000142e+01	4.739999999999999858e+01	5.500000000000000000e+01	6.559999999999999432e+01	6.289999999999999858e+01	5.160000000000000142e+01	6.600000000000000000e+01	5.910000000000000142e+01	6.459999999999999432e+01	6.029999999999999716e+01	6.150000000000000000e+01	5.820000000000000284e+01	6.170000000000000284e+01	6.120000000000000284e+01	6.529999999999999716e+01	5.229999999999999716e+01	5.889999999999999858e+01	5.370000000000000284e+01	6.360000000000000142e+01	6.070000000000000284e+01	6.429999999999999716e+01
6.060000000000000142e+01	6.470000000000000284e+01	5.350000000000000000e+01	5.679999999999999716e+01	5.239999999999999858e+01	2.060000000000000142e+01	3.010000000000000142e+01	6.079999999999999716e+01	5.860000000000000142e+01	4.260000000000000142e+01	5.489999999999999858e+01	6.470000000000000284e+01	6.400000000000000000e+01	6.559999999999999432e+01	5.310000000000000142e+01	6.010000000000000142e+01	6.389999999999999858e+01	5.179999999999999716e+01	6.179999999999999716e+01	5.750000000000000000e+01	5.289999999999999858e+01	5.820000000000000284e+01	6.329999999999999716e+01	6.310000000000000142e+01	5.960000000000000142e+01	6.520000000000000284e+01	6.509999999999999432e+01	6.620000000000000284e+01	5.900000000000000000e+01	4.160000000000000142e+01	3.760000000000000142e+01	5.670000000000000284e+01	6.579999999999999716e+01	6.260000000000000142e+01	5.489999999999999858e+01	6.570000000000000284e+01	5.879999999999999716e+01	6.490000000000000568e+01	5.900000000000000000e+01	6.210000000000000142e+01	5.870000000000000284e+01	6.200000000000000000e+01	6.029999999999999716e+01	6.600000000000000000e+01	4.960000000000000142e+01	5.950000000000000000e+01	5.570000000000000284e+01	6.470000000000000284e+01	6.179999999999999716e+01	6.389999999999999858e+01
6.050000000000000000e+01	6.500000000000000000e+01	5.460000000000000142e+01	5.160000000000000142e+01	5.650000000000000000e+01	1.960000000000000142e+01	2.430000000000000071e+01	6.050000000000000000e+01	5.820000000000000284e+01	4.420000000000000284e+01	5.420000000000000284e+01	6.360000000000000142e+01	6.400000000000000000e+01	6.459999999999999432e+01	5.050000000000000000e+01	6.110000000000000142e+01	6.450000000000000000e+01	5.300000000000000000e+01	6.179999999999999716e+01	5.850000000000000000e+01	5.400000000000000000e+01	5.850000000000000000e+01	6.450000000000000000e+01	6.120000000000000284e+01	6.029999999999999716e+01	6.520000000000000284e+01	6.629999999999999716e+01	6.559999999999999432e+01	6.060000000000000142e+01	3.870000000000000284e+01	3.429999999999999716e+01	5.639999999999999858e+01	6.339999999999999858e+01	6.300000000000000000e+01	5.389999999999999858e+01	6.470000000000000284e+01	6.089999999999999858e+01	6.540000000000000568e+01	5.970000000000000284e+01	6.370000000000000284e+01	5.779999999999999716e+01	6.260000000000000142e+01	6.010000000000000142e+01	6.550000000000000000e+01	4.989999999999999858e+01	5.970000000000000284e+01	5.579999999999999716e+01	6.440000000000000568e+01	6.279999999999999716e+01	6.320000000000000284e+01
6.110000000000000142e+01	6.440000000000000568e+01	5.270000000000000284e+01	5.150000000000000000e+01	5.620000000000000284e+01	2.119999999999999929e+01	2.230000000000000071e+01	5.829999999999999716e+01	5.929999999999999716e+01	4.300000000000000000e+01	5.550000000000000000e+01	6.409999999999999432e+01	6.389999999999999858e+01	6.360000000000000142e+01	5.170000000000000284e+01	6.179999999999999716e+01	6.389999999999999858e+01	5.360000000000000142e+01	6.120000000000000284e+01	5.970000000000000284e+01	5.489999999999999858e+01	5.720000000000000284e+01	6.479999999999999716e+01	5.960000000000000142e+01	6.260000000000000142e+01	6.520000000000000284e+01	6.529999999999999716e+01	6.470000000000000284e+01	5.950000000000000000e+01	3.860000000000000142e+01	3.289999999999999858e+01	5.710000000000000142e+01	6.459999999999999432e+01	6.379999999999999716e+01	5.579999999999999716e+01	6.600000000000000000e+01	5.839999999999999858e+01	6.520000000000000284e+01	6.160000000000000142e+01	6.409999999999999432e+01	5.660000000000000142e+01	6.450000000000000000e+01	5.920000000000000284e+01	6.400000000000000000e+01	5.120000000000000284e+01	6.060000000000000142e+01	5.650000000000000000e+01	6.470000000000000284e+01	6.270000000000000284e+01	6.310000000000000142e+01
6.289999999999999858e+01	6.200000000000000000e+01	4.889999999999999858e+01	5.339999999999999858e+01	5.110000000000000142e+01	2.189999999999999858e+01	2.200000000000000000e+01	5.770000000000000284e+01	5.870000000000000284e+01	4.229999999999999716e+01	5.460000000000000142e+01	6.120000000000000284e+01	6.440000000000000568e+01	6.350000000000000000e+01	5.320000000000000284e+01	6.020000000000000284e+01	6.450000000000000000e+01	5.510000000000000142e+01	6.279999999999999716e+01	6.050000000000000000e+01	5.620000000000000284e+01	5.889999999999999858e+01	6.590000000000000568e+01	5.829999999999999716e+01	6.229999999999999716e+01	6.529999999999999716e+01	6.600000000000000000e+01	6.500000000000000000e+01	6.039999999999999858e+01	3.800000000000000000e+01	3.239999999999999858e+01	5.960000000000000142e+01	6.579999999999999716e+01	6.350000000000000000e+01	5.789999999999999858e+01	6.620000000000000284e+01	5.879999999999999716e+01	6.559999999999999432e+01	6.139999999999999858e+01	6.470000000000000284e+01	5.729999999999999716e+01	6.429999999999999716e+01	6.279999999999999716e+01	6.509999999999999432e+01	5.179999999999999716e+01	6.060000000000000142e+01	5.779999999999999716e+01	6.500000000000000000e+01	6.509999999999999432e+01	6.389999999999999858e+01
6.239999999999999858e+01	6.409999999999999432e+01	4.789999999999999858e+01	5.210000000000000142e+01	5.010000000000000142e+01	2.100000000000000000e+01	2.300000000000000000e+01	5.889999999999999858e+01	5.910000000000000142e+01	4.420000000000000284e+01	5.339999999999999858e+01	6.220000000000000284e+01	6.389999999999999858e+01	6.270000000000000284e+01	5.050000000000000000e+01	6.029999999999999716e+01	6.339999999999999858e+01	5.700000000000000000e+01	6.050000000000000000e+01	6.150000000000000000e+01	5.660000000000000142e+01	5.960000000000000142e+01	6.429999999999999716e+01	5.350000000000000000e+01	6.229999999999999716e+01	6.520000000000000284e+01	6.360000000000000142e+01	6.529999999999999716e+01	6.129999999999999716e+01	4.410000000000000142e+01	3.870000000000000284e+01	6.079999999999999716e+01	6.640000000000000568e+01	6.229999999999999716e+01	5.889999999999999858e+01	6.709999999999999432e+01	5.960000000000000142e+01	6.550000000000000000e+01	6.310000000000000142e+01	6.509999999999999432e+01	5.800000000000000000e+01	6.429999999999999716e+01	6.550000000000000000e+01	6.590000000000000568e+01	5.329999999999999716e+01	6.089999999999999858e+01	5.839999999999999858e+01	6.260000000000000142e+01	6.189999999999999858e+01	6.429999999999999716e+01
6.360000000000000142e+01	6.370000000000000284e+01	4.889999999999999858e+01	5.289999999999999858e+01	5.289999999999999858e+01	2.850000000000000000e+01	1.869999999999999929e+01	5.850000000000000000e+01	6.060000000000000142e+01	4.060000000000000142e+01	5.420000000000000284e+01	6.300000000000000000e+01	6.440000000000000568e+01	6.289999999999999858e+01	5.200000000000000000e+01	6.179999999999999716e+01	6.479999999999999716e+01	5.679999999999999716e+01	6.250000000000000000e+01	6.250000000000000000e+01	5.639999999999999858e+01	6.020000000000000284e+01	6.379999999999999716e+01	5.770000000000000284e+01	6.220000000000000284e+01	6.520000000000000284e+01	6.360000000000000142e+01	6.520000000000000284e+01	6.239999999999999858e+01	5.089999999999999858e+01	4.779999999999999716e+01	5.850000000000000000e+01	6.650000000000000000e+01	6.189999999999999858e+01	5.550000000000000000e+01	6.640000000000000568e+01	6.110000000000000142e+01	6.490000000000000568e+01	6.160000000000000142e+01	6.520000000000000284e+01	5.779999999999999716e+01	6.479999999999999716e+01	6.279999999999999716e+01	6.570000000000000284e+01	5.400000000000000000e+01	6.139999999999999858e+01	5.739999999999999858e+01	6.350000000000000000e+01	6.160000000000000142e+01	6.400000000000000000e+01
6.459999999999999432e+01	6.379999999999999716e+01	5.160000000000000142e+01	5.250000000000000000e+01	5.529999999999999716e+01	4.100000000000000000e+01	2.589999999999999858e+01	5.979999999999999716e+01	5.939999999999999858e+01	4.079999999999999716e+01	5.250000000000000000e+01	6.270000000000000284e+01	6.420000000000000284e+01	6.139999999999999858e+01	4.989999999999999858e+01	6.129999999999999716e+01	6.529999999999999716e+01	5.510000000000000142e+01	6.220000000000000284e+01	5.979999999999999716e+01	5.470000000000000284e+01	6.029999999999999716e+01	6.270000000000000284e+01	5.589999999999999858e+01	6.150000000000000000e+01	6.509999999999999432e+01	6.250000000000000000e+01	6.429999999999999716e+01	6.139999999999999858e+01	5.229999999999999716e+01	5.220000000000000284e+01	5.639999999999999858e+01	6.579999999999999716e+01	6.089999999999999858e+01	5.160000000000000142e+01	6.629999999999999716e+01	6.110000000000000142e+01	6.400000000000000000e+01	5.979999999999999716e+01	6.400000000000000000e+01	5.739999999999999858e+01	6.370000000000000284e+01	6.409999999999999432e+01	6.500000000000000000e+01	5.220000000000000284e+01	6.029999999999999716e+01	5.639999999999999858e+01	6.189999999999999858e+01	6.060000000000000142e+01	6.459999999999999432e+01
6.200000000000000000e+01	6.440000000000000568e+01	5.120000000000000284e+01	5.360000000000000142e+01	5.629999999999999716e+01	4.920000000000000284e+01	3.220000000000000284e+01	6.050000000000000000e+01	6.010000000000000142e+01	3.860000000000000142e+01	3.629999999999999716e+01	6.559999999999999432e+01	6.379999999999999716e+01	5.929999999999999716e+01	5.060000000000000142e+01	6.239999999999999858e+01	6.479999999999999716e+01	5.479999999999999716e+01	6.070000000000000284e+01	5.960000000000000142e+01	5.360000000000000142e+01	5.950000000000000000e+01	6.300000000000000000e+01	6.100000000000000000e+01	6.100000000000000000e+01	6.459999999999999432e+01	6.220000000000000284e+01	6.409999999999999432e+01	6.060000000000000142e+01	5.420000000000000284e+01	5.150000000000000000e+01	5.639999999999999858e+01	6.440000000000000568e+01	6.339999999999999858e+01	4.910000000000000142e+01	6.540000000000000568e+01	5.950000000000000000e+01	6.339999999999999858e+01	6.210000000000000142e+01	6.609999999999999432e+01	5.839999999999999858e+01	6.389999999999999858e+01	6.100000000000000000e+01	6.550000000000000000e+01	5.179999999999999716e+01	6.139999999999999858e+01	5.550000000000000000e+01	6.279999999999999716e+01	6.179999999999999716e+01	6.520000000000000284e+01
6.220000000000000284e+01	6.270000000000000284e+01	4.979999999999999716e+01	5.529999999999999716e+01	5.479999999999999716e+01	5.339999999999999858e+01	3.570000000000000284e+01	5.889999999999999858e+01	5.860000000000000142e+01	3.679999999999999716e+01	2.519999999999999929e+01	6.310000000000000142e+01	6.409999999999999432e+01	5.720000000000000284e+01	5.239999999999999858e+01	6.050000000000000000e+01	6.459999999999999432e+01	5.539999999999999858e+01	6.300000000000000000e+01	5.839999999999999858e+01	5.520000000000000284e+01	5.929999999999999716e+01	6.500000000000000000e+01	6.370000000000000284e+01	6.379999999999999716e+01	6.479999999999999716e+01	6.459999999999999432e+01	6.490000000000000568e+01	6.029999999999999716e+01	5.579999999999999716e+01	5.510000000000000142e+01	5.760000000000000142e+01	6.429999999999999716e+01	6.450000000000000000e+01	4.970000000000000284e+01	6.520000000000000284e+01	5.970000000000000284e+01	6.350000000000000000e+01	6.010000000000000142e+01	6.550000000000000000e+01	5.770000000000000284e+01	6.600000000000000000e+01	6.229999999999999716e+01	6.520000000000000284e+01	5.120000000000000284e+01	6.110000000000000142e+01	5.729999999999999716e+01	6.440000000000000568e+01	6.260000000000000142e+01	6.429999999999999716e+01
6.160000000000000142e+01	6.409999999999999432e+01	5.200000000000000000e+01	5.660000000000000142e+01	5.710000000000000142e+01	5.979999999999999716e+01	5.039999999999999858e+01	5.960000000000000142e+01	5.960000000000000142e+01	3.850000000000000000e+01	1.939999999999999858e+01	6.420000000000000284e+01	6.360000000000000142e+01	5.900000000000000000e+01	5.279999999999999716e+01	6.189999999999999858e+01	6.470000000000000284e+01	5.429999999999999716e+01	6.200000000000000000e+01	5.979999999999999716e+01	5.689999999999999858e+01	5.939999999999999858e+01	6.550000000000000000e+01	6.590000000000000568e+01	6.220000000000000284e+01	6.479999999999999716e+01	6.620000000000000284e+01	6.529999999999999716e+01	5.960000000000000142e+01	5.439999999999999858e+01	5.489999999999999858e+01	5.950000000000000000e+01	6.579999999999999716e+01	6.339999999999999858e+01	5.460000000000000142e+01	6.559999999999999432e+01	5.879999999999999716e+01	6.339999999999999858e+01	6.060000000000000142e+01	6.609999999999999432e+01	5.629999999999999716e+01	6.500000000000000000e+01	6.570000000000000284e+01	6.409999999999999432e+01	5.360000000000000142e+01	6.070000000000000284e+01	5.900000000000000000e+01	6.609999999999999432e+01	6.379999999999999716e+01	6.389999999999999858e+01
6.010000000000000142e+01	6.239999999999999858e+01	5.320000000000000284e+01	5.729999999999999716e+01	5.839999999999999858e+01	6.360000000000000142e+01	5.920000000000000284e+01	5.760000000000000142e+01	5.789999999999999858e+01	4.060000000000000142e+01	1.700000000000000000e+01	6.089999999999999858e+01	5.620000000000000284e+01	6.000000000000000000e+01	5.379999999999999716e+01	5.979999999999999716e+01	6.500000000000000000e+01	5.600000000000000000e+01	6.279999999999999716e+01	6.150000000000000000e+01	5.820000000000000284e+01	5.879999999999999716e+01	6.370000000000000284e+01	6.729999999999999716e+01	6.300000000000000000e+01	6.479999999999999716e+01	6.500000000000000000e+01	6.579999999999999716e+01	5.950000000000000000e+01	5.100000000000000000e+01	5.529999999999999716e+01	6.129999999999999716e+01	6.350000000000000000e+01	6.160000000000000142e+01	5.750000000000000000e+01	6.360000000000000142e+01	5.860000000000000142e+01	6.300000000000000000e+01	6.160000000000000142e+01	6.729999999999999716e+01	5.660000000000000142e+01	6.529999999999999716e+01	6.590000000000000568e+01	6.540000000000000568e+01	5.460000000000000142e+01	6.060000000000000142e+01	6.079999999999999716e+01	6.400000000000000000e+01	6.079999999999999716e+01	6.450000000000000000e+01
6.000000000000000000e+01	6.260000000000000142e+01	5.429999999999999716e+01	5.570000000000000284e+01	5.779999999999999716e+01	6.529999999999999716e+01	6.179999999999999716e+01	5.860000000000000142e+01	5.810000000000000142e+01	4.139999999999999858e+01	1.519999999999999929e+01	6.189999999999999858e+01	5.060000000000000142e+01	6.320000000000000284e+01	5.479999999999999716e+01	5.950000000000000000e+01	6.540000000000000568e+01	5.839999999999999858e+01	6.160000000000000142e+01	6.289999999999999858e+01	5.720000000000000284e+01	5.989999999999999858e+01	6.429999999999999716e+01	7.000000000000000000e+01	6.250000000000000000e+01	6.440000000000000568e+01	6.479999999999999716e+01	6.590000000000000568e+01	6.020000000000000284e+01	4.870000000000000284e+01	5.329999999999999716e+01	6.029999999999999716e+01	6.210000000000000142e+01	6.039999999999999858e+01	5.610000000000000142e+01	6.170000000000000284e+01	5.870000000000000284e+01	6.250000000000000000e+01	6.339999999999999858e+01	6.659999999999999432e+01	5.770000000000000284e+01	6.479999999999999716e+01	6.550000000000000000e+01	6.570000000000000284e+01	5.710000000000000142e+01	6.050000000000000000e+01	5.960000000000000142e+01	6.310000000000000142e+01	6.129999999999999716e+01	6.420000000000000284e+01
6.150000000000000000e+01	6.420000000000000284e+01	5.260000000000000142e+01	5.550000000000000000e+01	5.720000000000000284e+01	6.450000000000000000e+01	6.250000000000000000e+01	5.979999999999999716e+01	5.879999999999999716e+01	4.370000000000000284e+01	1.300000000000000000e+01	6.320000000000000284e+01	4.839999999999999858e+01	6.339999999999999858e+01	5.410000000000000142e+01	6.120000000000000284e+01	6.540000000000000568e+01	5.739999999999999858e+01	6.310000000000000142e+01	6.329999999999999716e+01	5.629999999999999716e+01	6.079999999999999716e+01	6.339999999999999858e+01	7.020000000000000284e+01	6.210000000000000142e+01	6.490000000000000568e+01	6.310000000000000142e+01	6.629999999999999716e+01	6.160000000000000142e+01	5.279999999999999716e+01	5.670000000000000284e+01	6.200000000000000000e+01	6.179999999999999716e+01	6.170000000000000284e+01	5.670000000000000284e+01	6.060000000000000142e+01	6.020000000000000284e+01	6.300000000000000000e+01	6.389999999999999858e+01	6.720000000000000284e+01	5.650000000000000000e+01	6.440000000000000568e+01	6.429999999999999716e+01	6.640000000000000568e+01	5.789999999999999858e+01	6.079999999999999716e+01	5.889999999999999858e+01	6.360000000000000142e+01	6.210000000000000142e+01	6.490000000000000568e+01
6.270000000000000284e+01	6.400000000000000000e+01	5.100000000000000000e+01	5.560000000000000142e+01	5.560000000000000142e+01	6.540000000000000568e+01	6.300000000000000000e+01	5.939999999999999858e+01	5.970000000000000284e+01	4.689999999999999858e+01	1.910000000000000142e+01	6.260000000000000142e+01	4.700000000000000000e+01	6.479999999999999716e+01	5.410000000000000142e+01	6.100000000000000000e+01	6.479999999999999716e+01	5.710000000000000142e+01	6.200000000000000000e+01	6.270000000000000284e+01	5.520000000000000284e+01	5.860000000000000142e+01	6.440000000000000568e+01	4.250000000000000000e+01	6.189999999999999858e+01	6.479999999999999716e+01	6.409999999999999432e+01	6.620000000000000284e+01	5.989999999999999858e+01	5.529999999999999716e+01	5.870000000000000284e+01	5.970000000000000284e+01	6.020000000000000284e+01	6.050000000000000000e+01	5.779999999999999716e+01	6.050000000000000000e+01	5.950000000000000000e+01	6.440000000000000568e+01	6.310000000000000142e+01	6.770000000000000284e+01	5.679999999999999716e+01	6.459999999999999432e+01	6.239999999999999858e+01	6.559999999999999432e+01	5.689999999999999858e+01	6.139999999999999858e+01	5.679999999999999716e+01	6.409999999999999432e+01	6.220000000000000284e+01	6.409999999999999432e+01
6.239999999999999858e+01	6.320000000000000284e+01	5.179999999999999716e+01	5.629999999999999716e+01	5.650000000000000000e+01	6.500000000000000000e+01	6.110000000000000142e+01	5.920000000000000284e+01	5.060000000000000142e+01	4.229999999999999716e+01	3.139999999999999858e+01	6.160000000000000142e+01	4.560000000000000142e+01	6.300000000000000000e+01	5.439999999999999858e+01	5.950000000000000000e+01	6.490000000000000568e+01	5.679999999999999716e+01	6.360000000000000142e+01	6.260000000000000142e+01	5.600000000000000000e+01	5.900000000000000000e+01	6.339999999999999858e+01	3.510000000000000142e+01	6.289999999999999858e+01	6.500000000000000000e+01	6.329999999999999716e+01	6.620000000000000284e+01	5.979999999999999716e+01	5.270000000000000284e+01	5.800000000000000000e+01	5.910000000000000142e+01	5.950000000000000000e+01	5.939999999999999858e+01	5.460000000000000142e+01	6.020000000000000284e+01	6.079999999999999716e+01	6.490000000000000568e+01	6.360000000000000142e+01	6.779999999999999716e+01	5.629999999999999716e+01	6.500000000000000000e+01	6.450000000000000000e+01	6.620000000000000284e+01	5.550000000000000000e+01	6.139999999999999858e+01	5.800000000000000000e+01	6.310000000000000142e+01	6.010000000000000142e+01	6.440000000000000568e+01
6.270000000000000284e+01	6.409999999999999432e+01	5.360000000000000142e+01	5.810000000000000142e+01	5.770000000000000284e+01	6.189999999999999858e+01	5.889999999999999858e+01	5.889999999999999858e+01	4.029999999999999716e+01	4.139999999999999858e+01	4.250000000000000000e+01	5.410000000000000142e+01	4.450000000000000000e+01	6.070000000000000284e+01	5.610000000000000142e+01	4.500000000000000000e+01	6.490000000000000568e+01	5.439999999999999858e+01	6.509999999999999432e+01	6.079999999999999716e+01	5.610000000000000142e+01	5.920000000000000284e+01	6.370000000000000284e+01	5.179999999999999716e+01	6.200000000000000000e+01	6.509999999999999432e+01	6.260000000000000142e+01	6.550000000000000000e+01	6.070000000000000284e+01	5.389999999999999858e+01	5.529999999999999716e+01	5.829999999999999716e+01	6.089999999999999858e+01	6.089999999999999858e+01	5.470000000000000284e+01	6.100000000000000000e+01	6.010000000000000142e+01	6.590000000000000568e+01	6.179999999999999716e+01	6.540000000000000568e+01	5.739999999999999858e+01	6.490000000000000568e+01	6.470000000000000284e+01	6.700000000000000000e+01	5.450000000000000000e+01	6.160000000000000142e+01	5.879999999999999716e+01	6.320000000000000284e+01	6.129999999999999716e+01	6.429999999999999716e+01
6.370000000000000284e+01	6.379999999999999716e+01	5.260000000000000142e+01	5.600000000000000000e+01	5.589999999999999858e+01	5.950000000000000000e+01	5.739999999999999858e+01	5.900000000000000000e+01	3.360000000000000142e+01	4.110000000000000142e+01	4.950000000000000000e+01	4.120000000000000284e+01	5.120000000000000284e+01	6.129999999999999716e+01	5.239999999999999858e+01	3.200000000000000000e+01	6.500000000000000000e+01	5.550000000000000000e+01	6.429999999999999716e+01	5.979999999999999716e+01	5.700000000000000000e+01	5.979999999999999716e+01	6.350000000000000000e+01	5.989999999999999858e+01	6.250000000000000000e+01	6.479999999999999716e+01	6.329999999999999716e+01	6.429999999999999716e+01	5.989999999999999858e+01	4.729999999999999716e+01	4.589999999999999858e+01	5.950000000000000000e+01	5.810000000000000142e+01	6.029999999999999716e+01	5.610000000000000142e+01	5.989999999999999858e+01	6.029999999999999716e+01	6.659999999999999432e+01	5.950000000000000000e+01	6.479999999999999716e+01	5.700000000000000000e+01	6.559999999999999432e+01	6.509999999999999432e+01	6.520000000000000284e+01	5.350000000000000000e+01	6.089999999999999858e+01	5.900000000000000000e+01	6.339999999999999858e+01	6.200000000000000000e+01	6.429999999999999716e+01
6.579999999999999716e+01	5.679999999999999716e+01	5.189999999999999858e+01	5.600000000000000000e+01	5.570000000000000284e+01	5.939999999999999858e+01	5.739999999999999858e+01	5.920000000000000284e+01	2.739999999999999858e+01	3.910000000000000142e+01	4.970000000000000284e+01	3.310000000000000142e+01	5.379999999999999716e+01	5.989999999999999858e+01	5.160000000000000142e+01	1.989999999999999858e+01	6.459999999999999432e+01	5.610000000000000142e+01	5.979999999999999716e+01	6.000000000000000000e+01	5.600000000000000000e+01	5.950000000000000000e+01	6.170000000000000284e+01	6.459999999999999432e+01	6.129999999999999716e+01	6.459999999999999432e+01	6.250000000000000000e+01	6.490000000000000568e+01	6.110000000000000142e+01	5.379999999999999716e+01	5.189999999999999858e+01	6.020000000000000284e+01	5.770000000000000284e+01	5.810000000000000142e+01	5.539999999999999858e+01	5.820000000000000284e+01	5.979999999999999716e+01	6.570000000000000284e+01	6.120000000000000284e+01	6.520000000000000284e+01	5.739999999999999858e+01	6.429999999999999716e+01	6.490000000000000568e+01	6.550000000000000000e+01	5.300000000000000000e+01	6.100000000000000000e+01	5.800000000000000000e+01	6.179999999999999716e+01	5.929999999999999716e+01	6.429999999999999716e+01
6.350000000000000000e+01	3.520000000000000284e+01	5.229999999999999716e+01	5.660000000000000142e+01	5.629999999999999716e+01	4.300000000000000000e+01	5.560000000000000142e+01	5.220000000000000284e+01	2.839999999999999858e+01	4.229999999999999716e+01	5.289999999999999858e+01	2.869999999999999929e+01	5.429999999999999716e+01	6.150000000000000000e+01	5.189999999999999858e+01	2.039999999999999858e+01	6.470000000000000284e+01	5.529999999999999716e+01	5.870000000000000284e+01	5.989999999999999858e+01	5.679999999999999716e+01	5.779999999999999716e+01	6.310000000000000142e+01	6.590000000000000568e+01	6.139999999999999858e+01	6.500000000000000000e+01	6.239999999999999858e+01	6.479999999999999716e+01	5.629999999999999716e+01	5.329999999999999716e+01	5.250000000000000000e+01	6.000000000000000000e+01	5.900000000000000000e+01	5.960000000000000142e+01	5.550000000000000000e+01	5.870000000000000284e+01	5.950000000000000000e+01	6.659999999999999432e+01	6.179999999999999716e+01	6.670000000000000284e+01	5.750000000000000000e+01	6.450000000000000000e+01	6.609999999999999432e+01	6.570000000000000284e+01	5.239999999999999858e+01	6.129999999999999716e+01	5.929999999999999716e+01	6.239999999999999858e+01	6.160000000000000142e+01	6.300000000000000000e+01
6.400000000000000000e+01	2.539999999999999858e+01	5.139999999999999858e+01	5.729999999999999716e+01	5.539999999999999858e+01	4.210000000000000142e+01	3.800000000000000000e+01	3.500000000000000000e+01	3.750000000000000000e+01	5.020000000000000284e+01	5.400000000000000000e+01	3.150000000000000000e+01	5.789999999999999858e+01	6.050000000000000000e+01	4.739999999999999858e+01	3.429999999999999716e+01	6.490000000000000568e+01	5.570000000000000284e+01	5.970000000000000284e+01	6.070000000000000284e+01	5.729999999999999716e+01	5.620000000000000284e+01	6.339999999999999858e+01	6.750000000000000000e+01	6.160000000000000142e+01	6.529999999999999716e+01	6.300000000000000000e+01	6.500000000000000000e+01	5.550000000000000000e+01	5.450000000000000000e+01	5.370000000000000284e+01	5.920000000000000284e+01	6.020000000000000284e+01	6.029999999999999716e+01	5.570000000000000284e+01	6.010000000000000142e+01	5.800000000000000000e+01	6.629999999999999716e+01	6.060000000000000142e+01	6.629999999999999716e+01	5.839999999999999858e+01	6.479999999999999716e+01	6.609999999999999432e+01	6.590000000000000568e+01	5.189999999999999858e+01	6.170000000000000284e+01	5.989999999999999858e+01	6.310000000000000142e+01	6.229999999999999716e+01	6.339999999999999858e+01
6.210000000000000142e+01	2.789999999999999858e+01	5.239999999999999858e+01	5.670000000000000284e+01	5.770000000000000284e+01	3.939999999999999858e+01	3.760000000000000142e+01	3.039999999999999858e+01	4.250000000000000000e+01	4.850000000000000000e+01	5.610000000000000142e+01	3.489999999999999858e+01	6.029999999999999716e+01	5.850000000000000000e+01	5.010000000000000142e+01	4.220000000000000284e+01	6.479999999999999716e+01	5.589999999999999858e+01	6.220000000000000284e+01	6.220000000000000284e+01	5.650000000000000000e+01	5.739999999999999858e+01	6.339999999999999858e+01	6.870000000000000284e+01	6.210000000000000142e+01	6.570000000000000284e+01	6.250000000000000000e+01	6.520000000000000284e+01	5.689999999999999858e+01	4.829999999999999716e+01	4.660000000000000142e+01	5.860000000000000142e+01	6.129999999999999716e+01	5.960000000000000142e+01	5.689999999999999858e+01	6.050000000000000000e+01	5.879999999999999716e+01	6.650000000000000000e+01	6.220000000000000284e+01	6.720000000000000284e+01	5.989999999999999858e+01	6.459999999999999432e+01	6.440000000000000568e+01	6.550000000000000000e+01	5.470000000000000284e+01	6.060000000000000142e+01	5.950000000000000000e+01	6.300000000000000000e+01	6.100000000000000000e+01	6.500000000000000000e+01
6.320000000000000284e+01	2.969999999999999929e+01	5.289999999999999858e+01	5.710000000000000142e+01	5.710000000000000142e+01	3.720000000000000284e+01	3.500000000000000000e+01	3.239999999999999858e+01	4.520000000000000284e+01	4.779999999999999716e+01	5.570000000000000284e+01	3.410000000000000142e+01	6.189999999999999858e+01	5.810000000000000142e+01	5.270000000000000284e+01	4.450000000000000000e+01	6.450000000000000000e+01	5.720000000000000284e+01	6.070000000000000284e+01	6.029999999999999716e+01	5.529999999999999716e+01	5.789999999999999858e+01	6.170000000000000284e+01	6.940000000000000568e+01	6.050000000000000000e+01	6.550000000000000000e+01	6.179999999999999716e+01	6.529999999999999716e+01	5.800000000000000000e+01	4.720000000000000284e+01	4.510000000000000142e+01	5.779999999999999716e+01	6.179999999999999716e+01	5.989999999999999858e+01	5.429999999999999716e+01	6.029999999999999716e+01	5.989999999999999858e+01	6.640000000000000568e+01	6.050000000000000000e+01	6.609999999999999432e+01	5.970000000000000284e+01	6.370000000000000284e+01	6.490000000000000568e+01	6.540000000000000568e+01	5.320000000000000284e+01	6.020000000000000284e+01	5.829999999999999716e+01	6.120000000000000284e+01	5.860000000000000142e+01	6.370000000000000284e+01
6.279999999999999716e+01	2.730000000000000071e+01	5.460000000000000142e+01	5.789999999999999858e+01	5.860000000000000142e+01	3.189999999999999858e+01	3.520000000000000284e+01	2.739999999999999858e+01	4.470000000000000284e+01	4.510000000000000142e+01	5.770000000000000284e+01	3.130000000000000071e+01	6.270000000000000284e+01	5.850000000000000000e+01	5.450000000000000000e+01	4.129999999999999716e+01	6.479999999999999716e+01	5.829999999999999716e+01	6.129999999999999716e+01	6.300000000000000000e+01	5.479999999999999716e+01	5.900000000000000000e+01	6.279999999999999716e+01	6.520000000000000284e+01	6.039999999999999858e+01	6.520000000000000284e+01	6.220000000000000284e+01	6.729999999999999716e+01	5.979999999999999716e+01	5.100000000000000000e+01	5.189999999999999858e+01	5.710000000000000142e+01	6.070000000000000284e+01	6.139999999999999858e+01	5.239999999999999858e+01	6.079999999999999716e+01	6.089999999999999858e+01	6.429999999999999716e+01	6.239999999999999858e+01	6.500000000000000000e+01	5.950000000000000000e+01	6.339999999999999858e+01	6.509999999999999432e+01	6.729999999999999716e+01	5.420000000000000284e+01	6.060000000000000142e+01	5.779999999999999716e+01	6.270000000000000284e+01	6.110000000000000142e+01	6.420000000000000284e+01
6.189999999999999858e+01	2.250000000000000000e+01	5.550000000000000000e+01	5.600000000000000000e+01	5.939999999999999858e+01	3.200000000000000000e+01	3.139999999999999858e+01	2.280000000000000071e+01	4.770000000000000284e+01	4.189999999999999858e+01	5.860000000000000142e+01	2.960000000000000142e+01	6.270000000000000284e+01	5.839999999999999858e+01	5.439999999999999858e+01	4.470000000000000284e+01	6.600000000000000000e+01	5.089999999999999858e+01	6.229999999999999716e+01	6.170000000000000284e+01	5.450000000000000000e+01	5.910000000000000142e+01	6.200000000000000000e+01	6.270000000000000284e+01	6.110000000000000142e+01	6.459999999999999432e+01	6.210000000000000142e+01	6.670000000000000284e+01	6.050000000000000000e+01	5.360000000000000142e+01	5.460000000000000142e+01	5.800000000000000000e+01	5.920000000000000284e+01	6.189999999999999858e+01	5.300000000000000000e+01	5.920000000000000284e+01	5.939999999999999858e+01	6.229999999999999716e+01	6.160000000000000142e+01	6.239999999999999858e+01	6.000000000000000000e+01	6.370000000000000284e+01	6.329999999999999716e+01	6.700000000000000000e+01	5.450000000000000000e+01	6.110000000000000142e+01	5.689999999999999858e+01	6.360000000000000142e+01	6.110000000000000142e+01	6.520000000000000284e+01
6.170000000000000284e+01	2.150000000000000000e+01	5.479999999999999716e+01	5.600000000000000000e+01	5.660000000000000142e+01	3.379999999999999716e+01	2.850000000000000000e+01	2.180000000000000071e+01	4.900000000000000000e+01	4.339999999999999858e+01	5.910000000000000142e+01	2.810000000000000142e+01	6.260000000000000142e+01	6.020000000000000284e+01	5.510000000000000142e+01	4.700000000000000000e+01	6.570000000000000284e+01	4.779999999999999716e+01	6.370000000000000284e+01	6.110000000000000142e+01	5.589999999999999858e+01	5.960000000000000142e+01	6.450000000000000000e+01	6.350000000000000000e+01	6.210000000000000142e+01	6.470000000000000284e+01	6.329999999999999716e+01	6.470000000000000284e+01	6.100000000000000000e+01	5.620000000000000284e+01	5.670000000000000284e+01	5.960000000000000142e+01	5.810000000000000142e+01	6.100000000000000000e+01	5.420000000000000284e+01	5.760000000000000142e+01	6.070000000000000284e+01	6.129999999999999716e+01	6.179999999999999716e+01	6.600000000000000000e+01	6.039999999999999858e+01	6.500000000000000000e+01	6.010000000000000142e+01	6.659999999999999432e+01	5.360000000000000142e+01	6.110000000000000142e+01	5.770000000000000284e+01	6.450000000000000000e+01	6.250000000000000000e+01	6.559999999999999432e+01
6.350000000000000000e+01	2.039999999999999858e+01	5.350000000000000000e+01	5.860000000000000142e+01	5.529999999999999716e+01	4.250000000000000000e+01	3.010000000000000142e+01	2.289999999999999858e+01	4.639999999999999858e+01	4.029999999999999716e+01	5.939999999999999858e+01	2.880000000000000071e+01	6.310000000000000142e+01	6.089999999999999858e+01	5.770000000000000284e+01	4.570000000000000284e+01	6.609999999999999432e+01	4.700000000000000000e+01	6.289999999999999858e+01	6.129999999999999716e+01	5.660000000000000142e+01	6.000000000000000000e+01	6.600000000000000000e+01	6.260000000000000142e+01	6.210000000000000142e+01	6.459999999999999432e+01	6.420000000000000284e+01	6.450000000000000000e+01	6.089999999999999858e+01	5.579999999999999716e+01	5.760000000000000142e+01	6.070000000000000284e+01	5.729999999999999716e+01	6.160000000000000142e+01	5.650000000000000000e+01	5.739999999999999858e+01	6.050000000000000000e+01	6.089999999999999858e+01	6.139999999999999858e+01	6.659999999999999432e+01	5.979999999999999716e+01	6.440000000000000568e+01	6.110000000000000142e+01	6.529999999999999716e+01	5.400000000000000000e+01	6.189999999999999858e+01	5.879999999999999716e+01	6.550000000000000000e+01	6.360000000000000142e+01	6.540000000000000568e+01
6.339999999999999858e+01	2.100000000000000000e+01	5.420000000000000284e+01	6.039999999999999858e+01	5.689999999999999858e+01	3.589999999999999858e+01	3.600000000000000000e+01	2.160000000000000142e+01	4.750000000000000000e+01	4.460000000000000142e+01	5.810000000000000142e+01	2.830000000000000071e+01	6.370000000000000284e+01	6.160000000000000142e+01	6.010000000000000142e+01	4.650000000000000000e+01	6.550000000000000000e+01	5.070000000000000284e+01	6.210000000000000142e+01	6.239999999999999858e+01	5.600000000000000000e+01	5.989999999999999858e+01	6.559999999999999432e+01	6.189999999999999858e+01	6.160000000000000142e+01	6.440000000000000568e+01	6.389999999999999858e+01	6.400000000000000000e+01	6.020000000000000284e+01	5.539999999999999858e+01	5.770000000000000284e+01	6.079999999999999716e+01	5.810000000000000142e+01	6.179999999999999716e+01	5.360000000000000142e+01	5.889999999999999858e+01	6.010000000000000142e+01	6.039999999999999858e+01	6.210000000000000142e+01	6.620000000000000284e+01	6.100000000000000000e+01	6.470000000000000284e+01	6.400000000000000000e+01	6.570000000000000284e+01	5.529999999999999716e+01	6.029999999999999716e+01	5.789999999999999858e+01	6.520000000000000284e+01	6.270000000000000284e+01	6.459999999999999432e+01
6.210000000000000142e+01	1.969999999999999929e+01	5.670000000000000284e+01	5.829999999999999716e+01	5.900000000000000000e+01	4.220000000000000284e+01	3.030000000000000071e+01	2.180000000000000071e+01	4.789999999999999858e+01	5.000000000000000000e+01	5.739999999999999858e+01	2.710000000000000142e+01	6.339999999999999858e+01	6.229999999999999716e+01	5.720000000000000284e+01	4.750000000000000000e+01	6.550000000000000000e+01	5.310000000000000142e+01	6.100000000000000000e+01	6.129999999999999716e+01	5.510000000000000142e+01	6.020000000000000284e+01	6.520000000000000284e+01	4.410000000000000142e+01	6.150000000000000000e+01	6.509999999999999432e+01	6.329999999999999716e+01	6.520000000000000284e+01	6.089999999999999858e+01	5.679999999999999716e+01	5.850000000000000000e+01	5.679999999999999716e+01	5.789999999999999858e+01	6.160000000000000142e+01	4.739999999999999858e+01	5.839999999999999858e+01	6.100000000000000000e+01	5.979999999999999716e+01	6.120000000000000284e+01	6.370000000000000284e+01	6.189999999999999858e+01	6.389999999999999858e+01	6.600000000000000000e+01	6.600000000000000000e+01	5.510000000000000142e+01	6.120000000000000284e+01	5.689999999999999858e+01	6.600000000000000000e+01	6.279999999999999716e+01	6.550000000000000000e+01
6.279999999999999716e+01	1.660000000000000142e+01	5.589999999999999858e+01	5.820000000000000284e+01	5.850000000000000000e+01	5.139999999999999858e+01	3.829999999999999716e+01	1.989999999999999858e+01	4.900000000000000000e+01	4.739999999999999858e+01	5.800000000000000000e+01	2.539999999999999858e+01	6.370000000000000284e+01	5.939999999999999858e+01	5.720000000000000284e+01	4.770000000000000284e+01	6.520000000000000284e+01	5.529999999999999716e+01	6.129999999999999716e+01	6.160000000000000142e+01	5.520000000000000284e+01	5.989999999999999858e+01	6.529999999999999716e+01	2.869999999999999929e+01	6.250000000000000000e+01	6.550000000000000000e+01	6.509999999999999432e+01	6.600000000000000000e+01	6.120000000000000284e+01	5.660000000000000142e+01	5.820000000000000284e+01	5.489999999999999858e+01	5.689999999999999858e+01	6.270000000000000284e+01	4.250000000000000000e+01	5.729999999999999716e+01	6.160000000000000142e+01	5.929999999999999716e+01	6.189999999999999858e+01	6.459999999999999432e+01	6.039999999999999858e+01	6.440000000000000568e+01	6.670000000000000284e+01	6.600000000000000000e+01	5.739999999999999858e+01	6.079999999999999716e+01	5.689999999999999858e+01	6.620000000000000284e+01	6.440000000000000568e+01	6.500000000000000000e+01
6.320000000000000284e+01	1.500000000000000000e+01	5.479999999999999716e+01	5.900000000000000000e+01	5.729999999999999716e+01	5.339999999999999858e+01	5.029999999999999716e+01	1.750000000000000000e+01	4.800000000000000000e+01	4.339999999999999858e+01	6.120000000000000284e+01	2.600000000000000000e+01	6.310000000000000142e+01	6.070000000000000284e+01	5.579999999999999716e+01	4.579999999999999716e+01	6.440000000000000568e+01	5.610000000000000142e+01	6.220000000000000284e+01	6.139999999999999858e+01	5.710000000000000142e+01	5.979999999999999716e+01	6.529999999999999716e+01	4.710000000000000142e+01	6.250000000000000000e+01	6.609999999999999432e+01	6.550000000000000000e+01	6.429999999999999716e+01	6.220000000000000284e+01	5.760000000000000142e+01	5.929999999999999716e+01	5.510000000000000142e+01	5.789999999999999858e+01	6.279999999999999716e+01	4.070000000000000284e+01	5.810000000000000142e+01	6.050000000000000000e+01	5.900000000000000000e+01	6.139999999999999858e+01	6.500000000000000000e+01	6.039999999999999858e+01	6.500000000000000000e+01	6.690000000000000568e+01	6.470000000000000284e+01	5.570000000000000284e+01	6.079999999999999716e+01	5.939999999999999858e+01	6.550000000000000000e+01	6.389999999999999858e+01	6.490000000000000568e+01
5.320000000000000284e+01	1.610000000000000142e+01	5.829999999999999716e+01	5.760000000000000142e+01	5.939999999999999858e+01	4.460000000000000142e+01	5.489999999999999858e+01	1.910000000000000142e+01	4.729999999999999716e+01	4.600000000000000000e+01	5.960000000000000142e+01	2.539999999999999858e+01	6.300000000000000000e+01	6.070000000000000284e+01	5.579999999999999716e+01	4.600000000000000000e+01	6.289999999999999858e+01	5.779999999999999716e+01	6.339999999999999858e+01	6.170000000000000284e+01	5.800000000000000000e+01	5.860000000000000142e+01	6.650000000000000000e+01	5.279999999999999716e+01	6.210000000000000142e+01	6.590000000000000568e+01	6.570000000000000284e+01	6.540000000000000568e+01	6.020000000000000284e+01	5.750000000000000000e+01	5.900000000000000000e+01	5.379999999999999716e+01	5.750000000000000000e+01	6.559999999999999432e+01	3.629999999999999716e+01	5.810000000000000142e+01	6.110000000000000142e+01	5.560000000000000142e+01	6.089999999999999858e+01	4.760000000000000142e+01	6.029999999999999716e+01	6.400000000000000000e+01	6.200000000000000000e+01	6.620000000000000284e+01	5.610000000000000142e+01	6.089999999999999858e+01	5.989999999999999858e+01	6.650000000000000000e+01	6.579999999999999716e+01	6.379999999999999716e+01
3.850000000000000000e+01	1.750000000000000000e+01	5.660000000000000142e+01	5.860000000000000142e+01	5.810000000000000142e+01	3.929999999999999716e+01	5.810000000000000142e+01	1.880000000000000071e+01	4.929999999999999716e+01	4.250000000000000000e+01	5.850000000000000000e+01	2.650000000000000000e+01	6.300000000000000000e+01	6.189999999999999858e+01	5.789999999999999858e+01	4.789999999999999858e+01	6.409999999999999432e+01	5.879999999999999716e+01	6.239999999999999858e+01	6.270000000000000284e+01	5.689999999999999858e+01	5.870000000000000284e+01	6.440000000000000568e+01	5.650000000000000000e+01	6.120000000000000284e+01	6.620000000000000284e+01	6.559999999999999432e+01	6.370000000000000284e+01	5.939999999999999858e+01	5.410000000000000142e+01	5.470000000000000284e+01	5.260000000000000142e+01	5.720000000000000284e+01	6.450000000000000000e+01	3.139999999999999858e+01	5.800000000000000000e+01	6.060000000000000142e+01	5.229999999999999716e+01	6.270000000000000284e+01	3.620000000000000284e+01	5.960000000000000142e+01	6.310000000000000142e+01	6.500000000000000000e+01	6.579999999999999716e+01	5.820000000000000284e+01	6.079999999999999716e+01	5.910000000000000142e+01	6.670000000000000284e+01	6.529999999999999716e+01	6.350000000000000000e+01
3.200000000000000000e+01	1.800000000000000000e+01	5.479999999999999716e+01	5.970000000000000284e+01	5.629999999999999716e+01	4.039999999999999858e+01	6.050000000000000000e+01	1.900000000000000000e+01	4.750000000000000000e+01	4.410000000000000142e+01	5.689999999999999858e+01	2.750000000000000000e+01	6.279999999999999716e+01	6.000000000000000000e+01	5.889999999999999858e+01	4.589999999999999858e+01	6.490000000000000568e+01	5.870000000000000284e+01	6.320000000000000284e+01	6.129999999999999716e+01	5.739999999999999858e+01	5.910000000000000142e+01	6.470000000000000284e+01	5.789999999999999858e+01	6.170000000000000284e+01	6.409999999999999432e+01	6.570000000000000284e+01	6.370000000000000284e+01	5.989999999999999858e+01	4.420000000000000284e+01	3.860000000000000142e+01	5.270000000000000284e+01	5.660000000000000142e+01	6.400000000000000000e+01	2.700000000000000000e+01	5.820000000000000284e+01	6.139999999999999858e+01	4.850000000000000000e+01	6.189999999999999858e+01	2.939999999999999858e+01	5.939999999999999858e+01	6.459999999999999432e+01	6.339999999999999858e+01	6.500000000000000000e+01	5.350000000000000000e+01	6.110000000000000142e+01	5.929999999999999716e+01	6.679999999999999716e+01	6.420000000000000284e+01	6.379999999999999716e+01
2.750000000000000000e+01	1.939999999999999858e+01	5.550000000000000000e+01	6.029999999999999716e+01	5.639999999999999858e+01	3.679999999999999716e+01	6.100000000000000000e+01	2.119999999999999929e+01	4.700000000000000000e+01	4.060000000000000142e+01	5.670000000000000284e+01	2.780000000000000071e+01	6.250000000000000000e+01	6.139999999999999858e+01	6.060000000000000142e+01	4.600000000000000000e+01	6.409999999999999432e+01	5.710000000000000142e+01	6.070000000000000284e+01	6.010000000000000142e+01	5.639999999999999858e+01	6.060000000000000142e+01	6.570000000000000284e+01	5.250000000000000000e+01	6.100000000000000000e+01	6.339999999999999858e+01	6.540000000000000568e+01	6.360000000000000142e+01	6.139999999999999858e+01	4.000000000000000000e+01	2.860000000000000142e+01	5.120000000000000284e+01	5.510000000000000142e+01	6.470000000000000284e+01	3.100000000000000000e+01	5.720000000000000284e+01	5.920000000000000284e+01	4.720000000000000284e+01	6.160000000000000142e+01	2.700000000000000000e+01	6.100000000000000000e+01	6.440000000000000568e+01	6.500000000000000000e+01	6.500000000000000000e+01	5.200000000000000000e+01	6.079999999999999716e+01	5.860000000000000142e+01	6.609999999999999432e+01	6.329999999999999716e+01	6.500000000000000000e+01
2.469999999999999929e+01	1.860000000000000142e+01	5.689999999999999858e+01	5.810000000000000142e+01	5.750000000000000000e+01	3.350000000000000000e+01	6.039999999999999858e+01	2.050000000000000000e+01	4.850000000000000000e+01	4.260000000000000142e+01	5.579999999999999716e+01	2.680000000000000071e+01	6.270000000000000284e+01	6.279999999999999716e+01	5.670000000000000284e+01	4.679999999999999716e+01	6.189999999999999858e+01	5.610000000000000142e+01	6.270000000000000284e+01	6.120000000000000284e+01	5.810000000000000142e+01	5.970000000000000284e+01	6.429999999999999716e+01	3.750000000000000000e+01	6.220000000000000284e+01	6.420000000000000284e+01	6.559999999999999432e+01	6.120000000000000284e+01	6.060000000000000142e+01	3.660000000000000142e+01	2.339999999999999858e+01	5.329999999999999716e+01	5.470000000000000284e+01	6.479999999999999716e+01	3.229999999999999716e+01	5.539999999999999858e+01	5.179999999999999716e+01	4.560000000000000142e+01	6.250000000000000000e+01	2.539999999999999858e+01	6.070000000000000284e+01	6.500000000000000000e+01	6.670000000000000284e+01	6.189999999999999858e+01	5.479999999999999716e+01	6.120000000000000284e+01	6.020000000000000284e+01	6.659999999999999432e+01	6.459999999999999432e+01	6.490000000000000568e+01
2.660000000000000142e+01	1.850000000000000000e+01	5.550000000000000000e+01	5.910000000000000142e+01	5.720000000000000284e+01	3.210000000000000142e+01	6.260000000000000142e+01	1.989999999999999858e+01	4.810000000000000142e+01	3.979999999999999716e+01	5.120000000000000284e+01	2.610000000000000142e+01	6.270000000000000284e+01	6.310000000000000142e+01	5.760000000000000142e+01	4.579999999999999716e+01	6.100000000000000000e+01	5.320000000000000284e+01	6.210000000000000142e+01	6.170000000000000284e+01	5.820000000000000284e+01	6.070000000000000284e+01	6.570000000000000284e+01	4.660000000000000142e+01	6.270000000000000284e+01	6.379999999999999716e+01	6.659999999999999432e+01	5.720000000000000284e+01	6.139999999999999858e+01	3.030000000000000071e+01	2.089999999999999858e+01	5.329999999999999716e+01	5.500000000000000000e+01	6.220000000000000284e+01	3.100000000000000000e+01	5.600000000000000000e+01	3.950000000000000000e+01	4.510000000000000142e+01	6.129999999999999716e+01	2.560000000000000142e+01	6.079999999999999716e+01	6.529999999999999716e+01	6.740000000000000568e+01	5.800000000000000000e+01	5.860000000000000142e+01	6.100000000000000000e+01	6.050000000000000000e+01	6.640000000000000568e+01	6.520000000000000284e+01	6.379999999999999716e+01
2.710000000000000142e+01	1.950000000000000000e+01	5.710000000000000142e+01	5.939999999999999858e+01	5.839999999999999858e+01	3.339999999999999858e+01	6.020000000000000284e+01	1.860000000000000142e+01	4.810000000000000142e+01	4.760000000000000142e+01	4.389999999999999858e+01	2.760000000000000142e+01	6.270000000000000284e+01	6.250000000000000000e+01	5.739999999999999858e+01	4.610000000000000142e+01	5.879999999999999716e+01	5.550000000000000000e+01	6.070000000000000284e+01	6.329999999999999716e+01	5.779999999999999716e+01	6.060000000000000142e+01	6.500000000000000000e+01	4.989999999999999858e+01	6.170000000000000284e+01	6.479999999999999716e+01	6.490000000000000568e+01	5.650000000000000000e+01	6.220000000000000284e+01	3.229999999999999716e+01	2.530000000000000071e+01	5.370000000000000284e+01	5.520000000000000284e+01	6.160000000000000142e+01	3.010000000000000142e+01	5.660000000000000142e+01	2.939999999999999858e+01	4.500000000000000000e+01	6.200000000000000000e+01	2.500000000000000000e+01	6.150000000000000000e+01	6.440000000000000568e+01	6.750000000000000000e+01	5.789999999999999858e+01	5.970000000000000284e+01	5.810000000000000142e+01	5.970000000000000284e+01	6.550000000000000000e+01	6.360000000000000142e+01	6.420000000000000284e+01
2.650000000000000000e+01	2.080000000000000071e+01	5.679999999999999716e+01	5.889999999999999858e+01	5.800000000000000000e+01	3.229999999999999716e+01	4.510000000000000142e+01	2.130000000000000071e+01	4.829999999999999716e+01	5.350000000000000000e+01	4.779999999999999716e+01	2.860000000000000142e+01	6.200000000000000000e+01	6.270000000000000284e+01	5.679999999999999716e+01	4.720000000000000284e+01	5.689999999999999858e+01	5.750000000000000000e+01	6.039999999999999858e+01	6.220000000000000284e+01	5.929999999999999716e+01	6.129999999999999716e+01	6.620000000000000284e+01	5.479999999999999716e+01	6.150000000000000000e+01	6.620000000000000284e+01	6.629999999999999716e+01	5.879999999999999716e+01	6.170000000000000284e+01	3.360000000000000142e+01	2.750000000000000000e+01	5.350000000000000000e+01	5.520000000000000284e+01	6.129999999999999716e+01	2.800000000000000000e+01	5.720000000000000284e+01	3.320000000000000284e+01	4.439999999999999858e+01	6.250000000000000000e+01	2.569999999999999929e+01	6.079999999999999716e+01	6.409999999999999432e+01	6.559999999999999432e+01	6.060000000000000142e+01	5.639999999999999858e+01	5.770000000000000284e+01	6.060000000000000142e+01	6.590000000000000568e+01	6.529999999999999716e+01	6.520000000000000284e+01
2.510000000000000142e+01	1.980000000000000071e+01	5.710000000000000142e+01	5.810000000000000142e+01	5.800000000000000000e+01	2.950000000000000000e+01	4.139999999999999858e+01	2.210000000000000142e+01	4.779999999999999716e+01	5.089999999999999858e+01	5.000000000000000000e+01	2.869999999999999929e+01	5.789999999999999858e+01	6.300000000000000000e+01	5.750000000000000000e+01	4.739999999999999858e+01	5.829999999999999716e+01	5.700000000000000000e+01	6.250000000000000000e+01	6.300000000000000000e+01	5.829999999999999716e+01	6.089999999999999858e+01	6.670000000000000284e+01	5.629999999999999716e+01	6.229999999999999716e+01	6.659999999999999432e+01	6.529999999999999716e+01	5.829999999999999716e+01	6.089999999999999858e+01	3.200000000000000000e+01	2.610000000000000142e+01	5.329999999999999716e+01	5.500000000000000000e+01	5.910000000000000142e+01	2.910000000000000142e+01	5.589999999999999858e+01	3.210000000000000142e+01	4.439999999999999858e+01	6.029999999999999716e+01	2.389999999999999858e+01	6.179999999999999716e+01	6.459999999999999432e+01	6.700000000000000000e+01	5.960000000000000142e+01	5.739999999999999858e+01	6.100000000000000000e+01	5.950000000000000000e+01	6.509999999999999432e+01	6.500000000000000000e+01	6.500000000000000000e+01
2.789999999999999858e+01	2.100000000000000000e+01	5.410000000000000142e+01	5.860000000000000142e+01	5.529999999999999716e+01	3.810000000000000142e+01	3.529999999999999716e+01	2.169999999999999929e+01	4.729999999999999716e+01	4.589999999999999858e+01	4.250000000000000000e+01	2.839999999999999858e+01	5.529999999999999716e+01	6.239999999999999858e+01	5.779999999999999716e+01	4.679999999999999716e+01	5.929999999999999716e+01	5.720000000000000284e+01	6.350000000000000000e+01	6.229999999999999716e+01	5.700000000000000000e+01	6.110000000000000142e+01	6.540000000000000568e+01	5.939999999999999858e+01	6.409999999999999432e+01	6.620000000000000284e+01	6.289999999999999858e+01	5.679999999999999716e+01	6.139999999999999858e+01	3.229999999999999716e+01	2.439999999999999858e+01	5.279999999999999716e+01	5.570000000000000284e+01	6.029999999999999716e+01	3.180000000000000071e+01	5.670000000000000284e+01	2.930000000000000071e+01	4.589999999999999858e+01	5.650000000000000000e+01	2.639999999999999858e+01	6.270000000000000284e+01	6.600000000000000000e+01	6.659999999999999432e+01	5.739999999999999858e+01	5.689999999999999858e+01	6.170000000000000284e+01	5.839999999999999858e+01	6.279999999999999716e+01	6.129999999999999716e+01	6.550000000000000000e+01
3.060000000000000142e+01	2.169999999999999929e+01	5.360000000000000142e+01	6.100000000000000000e+01	5.550000000000000000e+01	4.679999999999999716e+01	4.570000000000000284e+01	2.269999999999999929e+01	4.739999999999999858e+01	4.810000000000000142e+01	3.629999999999999716e+01	2.960000000000000142e+01	5.370000000000000284e+01	6.060000000000000142e+01	6.070000000000000284e+01	4.650000000000000000e+01	6.020000000000000284e+01	5.910000000000000142e+01	6.450000000000000000e+01	6.220000000000000284e+01	5.810000000000000142e+01	6.120000000000000284e+01	6.559999999999999432e+01	6.110000000000000142e+01	6.310000000000000142e+01	6.659999999999999432e+01	6.189999999999999858e+01	5.820000000000000284e+01	6.229999999999999716e+01	3.310000000000000142e+01	2.739999999999999858e+01	5.260000000000000142e+01	5.560000000000000142e+01	6.139999999999999858e+01	3.039999999999999858e+01	5.529999999999999716e+01	3.000000000000000000e+01	4.729999999999999716e+01	5.320000000000000284e+01	2.769999999999999929e+01	6.220000000000000284e+01	6.529999999999999716e+01	6.400000000000000000e+01	5.900000000000000000e+01	5.760000000000000142e+01	6.220000000000000284e+01	5.910000000000000142e+01	6.420000000000000284e+01	6.300000000000000000e+01	6.520000000000000284e+01
3.239999999999999858e+01	2.130000000000000071e+01	5.260000000000000142e+01	6.210000000000000142e+01	5.329999999999999716e+01	5.370000000000000284e+01	5.450000000000000000e+01	2.310000000000000142e+01	4.520000000000000284e+01	4.800000000000000000e+01	3.639999999999999858e+01	2.910000000000000142e+01	5.210000000000000142e+01	6.000000000000000000e+01	6.020000000000000284e+01	4.470000000000000284e+01	5.970000000000000284e+01	5.929999999999999716e+01	6.540000000000000568e+01	6.260000000000000142e+01	5.960000000000000142e+01	6.179999999999999716e+01	6.559999999999999432e+01	6.170000000000000284e+01	6.260000000000000142e+01	6.440000000000000568e+01	6.279999999999999716e+01	5.750000000000000000e+01	6.160000000000000142e+01	3.439999999999999858e+01	2.860000000000000142e+01	5.400000000000000000e+01	5.520000000000000284e+01	6.189999999999999858e+01	2.830000000000000071e+01	5.450000000000000000e+01	2.700000000000000000e+01	4.710000000000000142e+01	4.639999999999999858e+01	2.419999999999999929e+01	6.310000000000000142e+01	6.550000000000000000e+01	6.570000000000000284e+01	6.020000000000000284e+01	5.879999999999999716e+01	6.329999999999999716e+01	6.110000000000000142e+01	6.379999999999999716e+01	6.229999999999999716e+01	6.459999999999999432e+01
4.020000000000000284e+01	2.030000000000000071e+01	5.120000000000000284e+01	6.070000000000000284e+01	5.139999999999999858e+01	5.900000000000000000e+01	5.929999999999999716e+01	2.200000000000000000e+01	4.100000000000000000e+01	5.210000000000000142e+01	3.470000000000000284e+01	3.030000000000000071e+01	5.100000000000000000e+01	6.129999999999999716e+01	5.970000000000000284e+01	3.889999999999999858e+01	5.929999999999999716e+01	5.950000000000000000e+01	6.600000000000000000e+01	6.310000000000000142e+01	5.810000000000000142e+01	6.139999999999999858e+01	6.389999999999999858e+01	6.120000000000000284e+01	6.300000000000000000e+01	6.450000000000000000e+01	6.179999999999999716e+01	5.710000000000000142e+01	6.129999999999999716e+01	3.379999999999999716e+01	2.660000000000000142e+01	5.229999999999999716e+01	5.439999999999999858e+01	6.270000000000000284e+01	2.639999999999999858e+01	5.439999999999999858e+01	3.400000000000000000e+01	4.570000000000000284e+01	3.389999999999999858e+01	2.250000000000000000e+01	5.810000000000000142e+01	6.620000000000000284e+01	6.470000000000000284e+01	5.950000000000000000e+01	5.979999999999999716e+01	6.279999999999999716e+01	6.000000000000000000e+01	6.339999999999999858e+01	6.189999999999999858e+01	6.550000000000000000e+01
5.389999999999999858e+01	2.150000000000000000e+01	5.039999999999999858e+01	6.129999999999999716e+01	4.989999999999999858e+01	5.550000000000000000e+01	6.300000000000000000e+01	2.239999999999999858e+01	4.000000000000000000e+01	5.400000000000000000e+01	3.270000000000000284e+01	3.069999999999999929e+01	5.039999999999999858e+01	6.229999999999999716e+01	6.050000000000000000e+01	3.620000000000000284e+01	5.939999999999999858e+01	6.020000000000000284e+01	6.490000000000000568e+01	6.440000000000000568e+01	5.929999999999999716e+01	6.279999999999999716e+01	5.660000000000000142e+01	6.010000000000000142e+01	6.279999999999999716e+01	6.470000000000000284e+01	5.529999999999999716e+01	5.660000000000000142e+01	6.170000000000000284e+01	3.160000000000000142e+01	2.439999999999999858e+01	5.189999999999999858e+01	5.370000000000000284e+01	6.320000000000000284e+01	3.010000000000000142e+01	5.510000000000000142e+01	4.760000000000000142e+01	4.460000000000000142e+01	3.820000000000000284e+01	2.480000000000000071e+01	6.089999999999999858e+01	6.590000000000000568e+01	6.289999999999999858e+01	5.779999999999999716e+01	5.960000000000000142e+01	6.260000000000000142e+01	6.100000000000000000e+01	6.479999999999999716e+01	6.150000000000000000e+01	6.400000000000000000e+01
6.079999999999999716e+01	2.319999999999999929e+01	5.420000000000000284e+01	6.270000000000000284e+01	5.410000000000000142e+01	6.039999999999999858e+01	6.300000000000000000e+01	2.330000000000000071e+01	3.520000000000000284e+01	4.850000000000000000e+01	3.350000000000000000e+01	2.900000000000000000e+01	4.960000000000000142e+01	5.970000000000000284e+01	6.139999999999999858e+01	2.860000000000000142e+01	5.989999999999999858e+01	6.020000000000000284e+01	6.339999999999999858e+01	6.160000000000000142e+01	5.979999999999999716e+01	6.300000000000000000e+01	4.260000000000000142e+01	5.829999999999999716e+01	6.200000000000000000e+01	6.389999999999999858e+01	3.829999999999999716e+01	5.539999999999999858e+01	6.189999999999999858e+01	3.039999999999999858e+01	2.400000000000000000e+01	5.389999999999999858e+01	5.300000000000000000e+01	6.339999999999999858e+01	3.429999999999999716e+01	5.410000000000000142e+01	4.960000000000000142e+01	4.670000000000000284e+01	4.800000000000000000e+01	2.489999999999999858e+01	6.089999999999999858e+01	6.600000000000000000e+01	6.239999999999999858e+01	5.679999999999999716e+01	5.620000000000000284e+01	6.239999999999999858e+01	6.100000000000000000e+01	5.920000000000000284e+01	5.150000000000000000e+01	6.339999999999999858e+01
6.540000000000000568e+01	1.769999999999999929e+01	5.720000000000000284e+01	6.060000000000000142e+01	5.820000000000000284e+01	6.289999999999999858e+01	6.320000000000000284e+01	1.969999999999999929e+01	3.350000000000000000e+01	4.670000000000000284e+01	4.210000000000000142e+01	2.789999999999999858e+01	5.020000000000000284e+01	5.939999999999999858e+01	6.029999999999999716e+01	2.660000000000000142e+01	5.889999999999999858e+01	5.939999999999999858e+01	6.409999999999999432e+01	6.070000000000000284e+01	5.950000000000000000e+01	6.120000000000000284e+01	3.929999999999999716e+01	5.800000000000000000e+01	6.360000000000000142e+01	6.429999999999999716e+01	3.429999999999999716e+01	5.460000000000000142e+01	6.120000000000000284e+01	3.250000000000000000e+01	2.389999999999999858e+01	5.529999999999999716e+01	5.579999999999999716e+01	6.470000000000000284e+01	3.100000000000000000e+01	5.460000000000000142e+01	4.929999999999999716e+01	4.939999999999999858e+01	5.020000000000000284e+01	2.519999999999999929e+01	6.220000000000000284e+01	6.620000000000000284e+01	6.440000000000000568e+01	5.670000000000000284e+01	5.589999999999999858e+01	6.260000000000000142e+01	6.039999999999999858e+01	4.350000000000000000e+01	4.000000000000000000e+01	6.450000000000000000e+01
6.570000000000000284e+01	1.880000000000000071e+01	5.689999999999999858e+01	6.379999999999999716e+01	5.839999999999999858e+01	6.450000000000000000e+01	6.389999999999999858e+01	1.939999999999999858e+01	3.119999999999999929e+01	4.920000000000000284e+01	5.060000000000000142e+01	2.639999999999999858e+01	4.810000000000000142e+01	5.970000000000000284e+01	6.289999999999999858e+01	2.219999999999999929e+01	5.960000000000000142e+01	5.850000000000000000e+01	6.579999999999999716e+01	6.020000000000000284e+01	5.900000000000000000e+01	6.070000000000000284e+01	3.470000000000000284e+01	5.950000000000000000e+01	6.570000000000000284e+01	6.429999999999999716e+01	3.080000000000000071e+01	5.610000000000000142e+01	6.110000000000000142e+01	3.139999999999999858e+01	2.330000000000000071e+01	5.370000000000000284e+01	5.439999999999999858e+01	6.550000000000000000e+01	3.200000000000000000e+01	5.550000000000000000e+01	4.670000000000000284e+01	4.839999999999999858e+01	4.060000000000000142e+01	2.550000000000000000e+01	6.239999999999999858e+01	6.809999999999999432e+01	6.509999999999999432e+01	5.889999999999999858e+01	5.550000000000000000e+01	6.279999999999999716e+01	6.020000000000000284e+01	3.520000000000000284e+01	3.210000000000000142e+01	6.370000000000000284e+01
6.620000000000000284e+01	1.630000000000000071e+01	5.779999999999999716e+01	6.079999999999999716e+01	5.879999999999999716e+01	6.409999999999999432e+01	6.429999999999999716e+01	1.850000000000000000e+01	3.060000000000000142e+01	5.510000000000000142e+01	4.129999999999999716e+01	2.619999999999999929e+01	4.950000000000000000e+01	5.900000000000000000e+01	6.229999999999999716e+01	2.130000000000000071e+01	5.950000000000000000e+01	5.970000000000000284e+01	6.520000000000000284e+01	5.910000000000000142e+01	5.900000000000000000e+01	6.210000000000000142e+01	3.100000000000000000e+01	5.489999999999999858e+01	6.420000000000000284e+01	6.450000000000000000e+01	2.850000000000000000e+01	5.389999999999999858e+01	6.239999999999999858e+01	2.969999999999999929e+01	2.100000000000000000e+01	5.439999999999999858e+01	5.439999999999999858e+01	6.509999999999999432e+01	2.830000000000000071e+01	5.529999999999999716e+01	5.010000000000000142e+01	4.529999999999999716e+01	3.289999999999999858e+01	2.450000000000000000e+01	6.440000000000000568e+01	6.679999999999999716e+01	6.770000000000000284e+01	5.610000000000000142e+01	5.629999999999999716e+01	6.310000000000000142e+01	6.060000000000000142e+01	2.889999999999999858e+01	2.710000000000000142e+01	5.889999999999999858e+01
6.690000000000000568e+01	1.519999999999999929e+01	5.610000000000000142e+01	6.060000000000000142e+01	5.679999999999999716e+01	6.420000000000000284e+01	6.470000000000000284e+01	1.719999999999999929e+01	2.900000000000000000e+01	5.689999999999999858e+01	4.200000000000000000e+01	2.510000000000000142e+01	4.920000000000000284e+01	5.950000000000000000e+01	6.050000000000000000e+01	2.030000000000000071e+01	5.939999999999999858e+01	6.000000000000000000e+01	6.490000000000000568e+01	5.939999999999999858e+01	5.939999999999999858e+01	6.270000000000000284e+01	3.220000000000000284e+01	5.400000000000000000e+01	6.329999999999999716e+01	6.509999999999999432e+01	2.750000000000000000e+01	5.479999999999999716e+01	6.329999999999999716e+01	2.810000000000000142e+01	2.130000000000000071e+01	5.429999999999999716e+01	5.410000000000000142e+01	6.089999999999999858e+01	2.489999999999999858e+01	5.360000000000000142e+01	5.150000000000000000e+01	4.479999999999999716e+01	3.820000000000000284e+01	2.400000000000000000e+01	6.470000000000000284e+01	6.620000000000000284e+01	6.590000000000000568e+01	5.639999999999999858e+01	5.779999999999999716e+01	6.370000000000000284e+01	6.070000000000000284e+01	2.569999999999999929e+01	2.639999999999999858e+01	6.179999999999999716e+01
6.870000000000000284e+01	1.689999999999999858e+01	5.439999999999999858e+01	6.160000000000000142e+01	5.360000000000000142e+01	6.229999999999999716e+01	6.529999999999999716e+01	1.600000000000000000e+01	3.169999999999999929e+01	5.360000000000000142e+01	4.170000000000000284e+01	2.430000000000000071e+01	4.960000000000000142e+01	6.029999999999999716e+01	6.129999999999999716e+01	2.189999999999999858e+01	5.929999999999999716e+01	5.960000000000000142e+01	6.459999999999999432e+01	5.850000000000000000e+01	5.929999999999999716e+01	6.220000000000000284e+01	2.680000000000000071e+01	4.860000000000000142e+01	5.039999999999999858e+01	6.239999999999999858e+01	2.639999999999999858e+01	5.529999999999999716e+01	6.220000000000000284e+01	2.780000000000000071e+01	2.019999999999999929e+01	5.450000000000000000e+01	5.250000000000000000e+01	4.110000000000000142e+01	2.880000000000000071e+01	5.289999999999999858e+01	3.979999999999999716e+01	4.339999999999999858e+01	4.579999999999999716e+01	2.300000000000000000e+01	6.329999999999999716e+01	6.300000000000000000e+01	6.379999999999999716e+01	5.600000000000000000e+01	5.800000000000000000e+01	6.350000000000000000e+01	6.029999999999999716e+01	2.339999999999999858e+01	2.319999999999999929e+01	6.300000000000000000e+01
6.979999999999999716e+01	1.430000000000000071e+01	5.629999999999999716e+01	6.079999999999999716e+01	5.620000000000000284e+01	6.279999999999999716e+01	6.609999999999999432e+01	1.530000000000000071e+01	3.250000000000000000e+01	4.939999999999999858e+01	3.739999999999999858e+01	2.519999999999999929e+01	5.000000000000000000e+01	6.070000000000000284e+01	5.979999999999999716e+01	2.250000000000000000e+01	5.879999999999999716e+01	5.929999999999999716e+01	6.389999999999999858e+01	5.510000000000000142e+01	6.060000000000000142e+01	6.220000000000000284e+01	2.700000000000000000e+01	3.739999999999999858e+01	4.270000000000000284e+01	5.900000000000000000e+01	2.710000000000000142e+01	5.250000000000000000e+01	6.170000000000000284e+01	2.580000000000000071e+01	1.839999999999999858e+01	5.520000000000000284e+01	5.389999999999999858e+01	2.960000000000000142e+01	2.950000000000000000e+01	5.400000000000000000e+01	2.760000000000000142e+01	4.320000000000000284e+01	4.939999999999999858e+01	2.330000000000000071e+01	6.310000000000000142e+01	6.000000000000000000e+01	6.289999999999999858e+01	5.410000000000000142e+01	5.320000000000000284e+01	6.440000000000000568e+01	6.170000000000000284e+01	1.960000000000000142e+01	2.000000000000000000e+01	6.329999999999999716e+01
6.850000000000000000e+01	1.860000000000000142e+01	5.660000000000000142e+01	6.279999999999999716e+01	5.779999999999999716e+01	6.000000000000000000e+01	6.450000000000000000e+01	1.810000000000000142e+01	3.160000000000000142e+01	5.110000000000000142e+01	4.120000000000000284e+01	2.869999999999999929e+01	5.110000000000000142e+01	6.079999999999999716e+01	6.339999999999999858e+01	2.169999999999999929e+01	5.939999999999999858e+01	5.820000000000000284e+01	5.939999999999999858e+01	5.489999999999999858e+01	6.020000000000000284e+01	5.589999999999999858e+01	3.000000000000000000e+01	3.080000000000000071e+01	3.950000000000000000e+01	5.700000000000000000e+01	3.360000000000000142e+01	5.279999999999999716e+01	5.160000000000000142e+01	2.739999999999999858e+01	1.969999999999999929e+01	5.670000000000000284e+01	5.279999999999999716e+01	2.289999999999999858e+01	3.270000000000000284e+01	5.360000000000000142e+01	2.319999999999999929e+01	4.139999999999999858e+01	5.389999999999999858e+01	2.439999999999999858e+01	6.320000000000000284e+01	5.870000000000000284e+01	6.700000000000000000e+01	5.420000000000000284e+01	5.310000000000000142e+01	6.409999999999999432e+01	6.060000000000000142e+01	1.950000000000000000e+01	1.910000000000000142e+01	6.490000000000000568e+01
6.459999999999999432e+01	1.760000000000000142e+01	5.900000000000000000e+01	6.250000000000000000e+01	5.929999999999999716e+01	5.410000000000000142e+01	6.389999999999999858e+01	1.780000000000000071e+01	3.470000000000000284e+01	4.860000000000000142e+01	3.929999999999999716e+01	2.860000000000000142e+01	4.900000000000000000e+01	5.800000000000000000e+01	6.279999999999999716e+01	2.700000000000000000e+01	5.970000000000000284e+01	5.789999999999999858e+01	5.860000000000000142e+01	5.520000000000000284e+01	6.229999999999999716e+01	4.170000000000000284e+01	4.479999999999999716e+01	3.879999999999999716e+01	3.689999999999999858e+01	5.750000000000000000e+01	4.210000000000000142e+01	5.150000000000000000e+01	3.860000000000000142e+01	2.750000000000000000e+01	1.910000000000000142e+01	5.710000000000000142e+01	5.210000000000000142e+01	1.860000000000000142e+01	3.069999999999999929e+01	5.270000000000000284e+01	2.210000000000000142e+01	3.970000000000000284e+01	5.820000000000000284e+01	2.519999999999999929e+01	6.310000000000000142e+01	5.710000000000000142e+01	6.840000000000000568e+01	5.370000000000000284e+01	5.610000000000000142e+01	6.379999999999999716e+01	6.239999999999999858e+01	2.350000000000000000e+01	2.939999999999999858e+01	6.529999999999999716e+01
6.559999999999999432e+01	1.910000000000000142e+01	5.720000000000000284e+01	6.039999999999999858e+01	5.689999999999999858e+01	4.620000000000000284e+01	6.559999999999999432e+01	1.889999999999999858e+01	3.279999999999999716e+01	4.620000000000000284e+01	3.910000000000000142e+01	2.960000000000000142e+01	4.870000000000000284e+01	5.529999999999999716e+01	6.020000000000000284e+01	2.460000000000000142e+01	5.860000000000000142e+01	5.929999999999999716e+01	6.039999999999999858e+01	5.420000000000000284e+01	6.300000000000000000e+01	5.029999999999999716e+01	5.129999999999999716e+01	4.179999999999999716e+01	3.629999999999999716e+01	5.710000000000000142e+01	4.510000000000000142e+01	5.110000000000000142e+01	4.279999999999999716e+01	2.910000000000000142e+01	2.100000000000000000e+01	5.639999999999999858e+01	5.339999999999999858e+01	2.439999999999999858e+01	2.950000000000000000e+01	5.489999999999999858e+01	2.050000000000000000e+01	4.210000000000000142e+01	6.039999999999999858e+01	2.369999999999999929e+01	6.389999999999999858e+01	5.779999999999999716e+01	6.879999999999999716e+01	5.139999999999999858e+01	5.550000000000000000e+01	6.409999999999999432e+01	6.409999999999999432e+01	3.150000000000000000e+01	3.770000000000000284e+01	6.540000000000000568e+01
6.709999999999999432e+01	1.789999999999999858e+01	5.660000000000000142e+01	6.029999999999999716e+01	5.589999999999999858e+01	4.850000000000000000e+01	6.540000000000000568e+01	1.969999999999999929e+01	3.220000000000000284e+01	5.260000000000000142e+01	3.450000000000000000e+01	3.019999999999999929e+01	4.960000000000000142e+01	5.520000000000000284e+01	6.089999999999999858e+01	2.450000000000000000e+01	5.829999999999999716e+01	6.050000000000000000e+01	6.050000000000000000e+01	5.670000000000000284e+01	6.129999999999999716e+01	4.439999999999999858e+01	5.660000000000000142e+01	4.250000000000000000e+01	3.570000000000000284e+01	5.710000000000000142e+01	4.439999999999999858e+01	5.220000000000000284e+01	3.420000000000000284e+01	3.429999999999999716e+01	1.860000000000000142e+01	5.510000000000000142e+01	5.260000000000000142e+01	3.260000000000000142e+01	3.320000000000000284e+01	5.370000000000000284e+01	2.080000000000000071e+01	4.270000000000000284e+01	6.189999999999999858e+01	2.310000000000000142e+01	6.490000000000000568e+01	5.770000000000000284e+01	6.420000000000000284e+01	5.329999999999999716e+01	5.739999999999999858e+01	6.420000000000000284e+01	6.239999999999999858e+01	3.839999999999999858e+01	3.910000000000000142e+01	6.470000000000000284e+01
6.659999999999999432e+01	1.730000000000000071e+01	5.370000000000000284e+01	6.200000000000000000e+01	5.320000000000000284e+01	5.450000000000000000e+01	6.579999999999999716e+01	1.810000000000000142e+01	2.639999999999999858e+01	5.010000000000000142e+01	3.279999999999999716e+01	2.869999999999999929e+01	5.010000000000000142e+01	5.720000000000000284e+01	6.310000000000000142e+01	1.590000000000000036e+01	5.929999999999999716e+01	6.189999999999999858e+01	6.210000000000000142e+01	6.050000000000000000e+01	6.110000000000000142e+01	3.729999999999999716e+01	5.660000000000000142e+01	4.250000000000000000e+01	3.679999999999999716e+01	5.889999999999999858e+01	4.570000000000000284e+01	5.420000000000000284e+01	3.169999999999999929e+01	3.270000000000000284e+01	1.869999999999999929e+01	5.539999999999999858e+01	5.270000000000000284e+01	4.770000000000000284e+01	3.479999999999999716e+01	5.420000000000000284e+01	2.130000000000000071e+01	4.400000000000000000e+01	6.420000000000000284e+01	2.539999999999999858e+01	6.429999999999999716e+01	5.860000000000000142e+01	6.310000000000000142e+01	5.470000000000000284e+01	5.989999999999999858e+01	6.420000000000000284e+01	6.250000000000000000e+01	4.529999999999999716e+01	4.600000000000000000e+01	6.229999999999999716e+01
6.750000000000000000e+01	1.390000000000000036e+01	5.160000000000000142e+01	6.329999999999999716e+01	5.129999999999999716e+01	5.910000000000000142e+01	6.540000000000000568e+01	1.710000000000000142e+01	2.930000000000000071e+01	4.439999999999999858e+01	3.410000000000000142e+01	2.630000000000000071e+01	4.810000000000000142e+01	5.920000000000000284e+01	6.479999999999999716e+01	2.069999999999999929e+01	5.929999999999999716e+01	6.079999999999999716e+01	6.260000000000000142e+01	6.250000000000000000e+01	6.360000000000000142e+01	3.050000000000000000e+01	5.920000000000000284e+01	4.600000000000000000e+01	3.689999999999999858e+01	6.029999999999999716e+01	5.339999999999999858e+01	5.450000000000000000e+01	2.910000000000000142e+01	3.010000000000000142e+01	1.919999999999999929e+01	5.589999999999999858e+01	5.250000000000000000e+01	5.620000000000000284e+01	3.139999999999999858e+01	5.329999999999999716e+01	2.069999999999999929e+01	4.529999999999999716e+01	6.379999999999999716e+01	2.739999999999999858e+01	6.379999999999999716e+01	5.789999999999999858e+01	6.500000000000000000e+01	5.550000000000000000e+01	6.039999999999999858e+01	6.509999999999999432e+01	6.260000000000000142e+01	5.500000000000000000e+01	5.510000000000000142e+01	6.270000000000000284e+01
6.779999999999999716e+01	1.530000000000000071e+01	5.050000000000000000e+01	6.279999999999999716e+01	5.060000000000000142e+01	5.420000000000000284e+01	6.600000000000000000e+01	1.459999999999999964e+01	2.839999999999999858e+01	4.460000000000000142e+01	3.180000000000000071e+01	2.439999999999999858e+01	4.860000000000000142e+01	6.170000000000000284e+01	6.229999999999999716e+01	1.819999999999999929e+01	5.970000000000000284e+01	6.210000000000000142e+01	6.440000000000000568e+01	6.540000000000000568e+01	6.250000000000000000e+01	3.060000000000000142e+01	6.229999999999999716e+01	4.210000000000000142e+01	3.800000000000000000e+01	5.929999999999999716e+01	5.850000000000000000e+01	5.570000000000000284e+01	2.930000000000000071e+01	3.089999999999999858e+01	2.069999999999999929e+01	5.550000000000000000e+01	5.239999999999999858e+01	6.160000000000000142e+01	3.080000000000000071e+01	5.400000000000000000e+01	1.969999999999999929e+01	4.400000000000000000e+01	6.429999999999999716e+01	2.500000000000000000e+01	6.239999999999999858e+01	5.979999999999999716e+01	6.720000000000000284e+01	5.620000000000000284e+01	6.189999999999999858e+01	6.570000000000000284e+01	6.170000000000000284e+01	5.839999999999999858e+01	5.639999999999999858e+01	6.370000000000000284e+01
6.790000000000000568e+01	1.480000000000000071e+01	5.010000000000000142e+01	6.250000000000000000e+01	4.939999999999999858e+01	5.850000000000000000e+01	6.659999999999999432e+01	1.639999999999999858e+01	2.689999999999999858e+01	4.560000000000000142e+01	3.700000000000000000e+01	2.539999999999999858e+01	4.820000000000000284e+01	6.239999999999999858e+01	6.160000000000000142e+01	1.750000000000000000e+01	6.070000000000000284e+01	5.950000000000000000e+01	6.329999999999999716e+01	6.579999999999999716e+01	6.160000000000000142e+01	2.730000000000000071e+01	6.050000000000000000e+01	4.010000000000000142e+01	3.460000000000000142e+01	5.279999999999999716e+01	6.179999999999999716e+01	5.589999999999999858e+01	2.689999999999999858e+01	3.100000000000000000e+01	1.989999999999999858e+01	5.629999999999999716e+01	5.320000000000000284e+01	6.400000000000000000e+01	2.969999999999999929e+01	5.389999999999999858e+01	2.330000000000000071e+01	4.410000000000000142e+01	6.620000000000000284e+01	2.660000000000000142e+01	6.389999999999999858e+01	5.739999999999999858e+01	6.690000000000000568e+01	5.650000000000000000e+01	6.200000000000000000e+01	6.579999999999999716e+01	6.220000000000000284e+01	5.400000000000000000e+01	5.279999999999999716e+01	6.339999999999999858e+01
6.820000000000000284e+01	1.450000000000000000e+01	4.879999999999999716e+01	6.170000000000000284e+01	4.820000000000000284e+01	5.820000000000000284e+01	6.629999999999999716e+01	1.490000000000000036e+01	2.669999999999999929e+01	5.389999999999999858e+01	3.970000000000000284e+01	2.630000000000000071e+01	4.739999999999999858e+01	6.020000000000000284e+01	6.200000000000000000e+01	1.519999999999999929e+01	6.020000000000000284e+01	6.289999999999999858e+01	6.229999999999999716e+01	6.570000000000000284e+01	6.220000000000000284e+01	2.360000000000000142e+01	6.010000000000000142e+01	4.339999999999999858e+01	3.620000000000000284e+01	5.229999999999999716e+01	6.150000000000000000e+01	5.679999999999999716e+01	2.339999999999999858e+01	3.260000000000000142e+01	1.960000000000000142e+01	5.500000000000000000e+01	5.500000000000000000e+01	6.370000000000000284e+01	3.139999999999999858e+01	5.560000000000000142e+01	2.169999999999999929e+01	4.450000000000000000e+01	6.429999999999999716e+01	3.050000000000000000e+01	6.329999999999999716e+01	5.720000000000000284e+01	6.859999999999999432e+01	5.689999999999999858e+01	6.089999999999999858e+01	6.650000000000000000e+01	6.250000000000000000e+01	5.489999999999999858e+01	5.460000000000000142e+01	6.379999999999999716e+01
6.940000000000000568e+01	1.209999999999999964e+01	4.910000000000000142e+01	6.450000000000000000e+01	4.860000000000000142e+01	5.579999999999999716e+01	6.509999999999999432e+01	1.369999999999999929e+01	2.730000000000000071e+01	5.329999999999999716e+01	3.779999999999999716e+01	2.580000000000000071e+01	4.879999999999999716e+01	5.920000000000000284e+01	6.600000000000000000e+01	1.710000000000000142e+01	6.129999999999999716e+01	6.370000000000000284e+01	6.200000000000000000e+01	6.640000000000000568e+01	6.039999999999999858e+01	2.330000000000000071e+01	6.409999999999999432e+01	4.579999999999999716e+01	4.679999999999999716e+01	5.810000000000000142e+01	6.350000000000000000e+01	5.610000000000000142e+01	2.230000000000000071e+01	3.150000000000000000e+01	1.880000000000000071e+01	5.639999999999999858e+01	5.339999999999999858e+01	6.479999999999999716e+01	3.010000000000000142e+01	5.420000000000000284e+01	1.769999999999999929e+01	4.470000000000000284e+01	6.590000000000000568e+01	2.800000000000000000e+01	6.609999999999999432e+01	6.000000000000000000e+01	6.850000000000000000e+01	5.820000000000000284e+01	6.139999999999999858e+01	6.650000000000000000e+01	6.060000000000000142e+01	6.229999999999999716e+01	6.050000000000000000e+01	6.459999999999999432e+01
6.990000000000000568e+01	1.569999999999999929e+01	5.029999999999999716e+01	6.620000000000000284e+01	5.010000000000000142e+01	5.629999999999999716e+01	6.609999999999999432e+01	1.400000000000000000e+01	2.580000000000000071e+01	5.379999999999999716e+01	3.389999999999999858e+01	2.589999999999999858e+01	4.960000000000000142e+01	6.010000000000000142e+01	6.790000000000000568e+01	1.610000000000000142e+01	6.120000000000000284e+01	6.400000000000000000e+01	6.270000000000000284e+01	6.479999999999999716e+01	6.200000000000000000e+01	2.569999999999999929e+01	6.650000000000000000e+01	4.360000000000000142e+01	5.470000000000000284e+01	6.150000000000000000e+01	6.370000000000000284e+01	5.550000000000000000e+01	2.339999999999999858e+01	3.110000000000000142e+01	1.619999999999999929e+01	5.570000000000000284e+01	5.379999999999999716e+01	6.490000000000000568e+01	3.189999999999999858e+01	5.510000000000000142e+01	1.689999999999999858e+01	4.379999999999999716e+01	6.409999999999999432e+01	2.660000000000000142e+01	6.529999999999999716e+01	6.339999999999999858e+01	6.840000000000000568e+01	5.639999999999999858e+01	5.989999999999999858e+01	6.700000000000000000e+01	6.239999999999999858e+01	6.320000000000000284e+01	6.179999999999999716e+01	6.490000000000000568e+01
6.979999999999999716e+01	1.600000000000000000e+01	5.010000000000000142e+01	6.709999999999999432e+01	5.020000000000000284e+01	6.100000000000000000e+01	6.559999999999999432e+01	1.590000000000000036e+01	2.430000000000000071e+01	5.350000000000000000e+01	3.450000000000000000e+01	2.660000000000000142e+01	4.770000000000000284e+01	5.950000000000000000e+01	6.790000000000000568e+01	1.219999999999999929e+01	5.979999999999999716e+01	6.070000000000000284e+01	6.279999999999999716e+01	6.550000000000000000e+01	6.300000000000000000e+01	2.650000000000000000e+01	6.709999999999999432e+01	4.179999999999999716e+01	5.920000000000000284e+01	6.370000000000000284e+01	6.429999999999999716e+01	5.529999999999999716e+01	2.250000000000000000e+01	3.119999999999999929e+01	1.639999999999999858e+01	5.620000000000000284e+01	5.510000000000000142e+01	6.529999999999999716e+01	3.060000000000000142e+01	5.500000000000000000e+01	1.880000000000000071e+01	4.450000000000000000e+01	6.550000000000000000e+01	3.010000000000000142e+01	6.429999999999999716e+01	6.540000000000000568e+01	6.829999999999999716e+01	5.679999999999999716e+01	6.010000000000000142e+01	6.690000000000000568e+01	6.310000000000000142e+01	6.479999999999999716e+01	6.339999999999999858e+01	6.459999999999999432e+01
7.100000000000000000e+01	1.319999999999999929e+01	5.110000000000000142e+01	6.600000000000000000e+01	5.110000000000000142e+01	6.270000000000000284e+01	6.629999999999999716e+01	1.540000000000000036e+01	2.700000000000000000e+01	5.039999999999999858e+01	3.310000000000000142e+01	2.430000000000000071e+01	4.889999999999999858e+01	5.929999999999999716e+01	6.670000000000000284e+01	1.650000000000000000e+01	5.979999999999999716e+01	6.329999999999999716e+01	6.389999999999999858e+01	6.289999999999999858e+01	6.520000000000000284e+01	2.330000000000000071e+01	6.759999999999999432e+01	4.170000000000000284e+01	6.200000000000000000e+01	6.520000000000000284e+01	6.339999999999999858e+01	5.300000000000000000e+01	2.100000000000000000e+01	2.930000000000000071e+01	1.680000000000000071e+01	5.689999999999999858e+01	5.479999999999999716e+01	6.479999999999999716e+01	3.239999999999999858e+01	5.539999999999999858e+01	1.800000000000000000e+01	4.739999999999999858e+01	6.409999999999999432e+01	3.119999999999999929e+01	5.989999999999999858e+01	6.690000000000000568e+01	6.450000000000000000e+01	5.550000000000000000e+01	5.800000000000000000e+01	6.670000000000000284e+01	6.420000000000000284e+01	6.470000000000000284e+01	6.279999999999999716e+01	6.400000000000000000e+01
7.159999999999999432e+01	1.359999999999999964e+01	5.089999999999999858e+01	6.520000000000000284e+01	5.129999999999999716e+01	6.509999999999999432e+01	6.520000000000000284e+01	1.450000000000000000e+01	2.860000000000000142e+01	4.770000000000000284e+01	3.650000000000000000e+01	2.350000000000000000e+01	4.839999999999999858e+01	6.000000000000000000e+01	6.659999999999999432e+01	2.000000000000000000e+01	5.900000000000000000e+01	6.529999999999999716e+01	6.459999999999999432e+01	6.440000000000000568e+01	6.490000000000000568e+01	2.639999999999999858e+01	6.470000000000000284e+01	4.200000000000000000e+01	6.220000000000000284e+01	6.500000000000000000e+01	6.170000000000000284e+01	5.579999999999999716e+01	2.510000000000000142e+01	2.669999999999999929e+01	1.739999999999999858e+01	5.810000000000000142e+01	5.589999999999999858e+01	6.320000000000000284e+01	3.039999999999999858e+01	5.660000000000000142e+01	1.869999999999999929e+01	4.700000000000000000e+01	6.450000000000000000e+01	2.589999999999999858e+01	5.270000000000000284e+01	6.690000000000000568e+01	6.289999999999999858e+01	5.700000000000000000e+01	6.070000000000000284e+01	6.600000000000000000e+01	6.389999999999999858e+01	6.420000000000000284e+01	6.110000000000000142e+01	6.310000000000000142e+01
6.950000000000000000e+01	1.660000000000000142e+01	5.410000000000000142e+01	6.540000000000000568e+01	5.489999999999999858e+01	6.520000000000000284e+01	6.429999999999999716e+01	1.750000000000000000e+01	2.660000000000000142e+01	4.910000000000000142e+01	4.460000000000000142e+01	2.539999999999999858e+01	4.829999999999999716e+01	6.029999999999999716e+01	6.609999999999999432e+01	1.580000000000000071e+01	6.089999999999999858e+01	6.500000000000000000e+01	6.490000000000000568e+01	6.579999999999999716e+01	6.350000000000000000e+01	2.389999999999999858e+01	6.520000000000000284e+01	4.270000000000000284e+01	6.379999999999999716e+01	6.490000000000000568e+01	6.179999999999999716e+01	5.510000000000000142e+01	2.410000000000000142e+01	2.550000000000000000e+01	1.600000000000000000e+01	5.620000000000000284e+01	5.479999999999999716e+01	6.389999999999999858e+01	2.919999999999999929e+01	5.639999999999999858e+01	1.900000000000000000e+01	4.410000000000000142e+01	6.640000000000000568e+01	2.460000000000000142e+01	5.810000000000000142e+01	6.740000000000000568e+01	6.740000000000000568e+01	5.689999999999999858e+01	6.150000000000000000e+01	6.629999999999999716e+01	6.360000000000000142e+01	6.500000000000000000e+01	6.179999999999999716e+01	6.260000000000000142e+01
6.909999999999999432e+01	1.330000000000000071e+01	6.050000000000000000e+01	6.650000000000000000e+01	6.110000000000000142e+01	6.570000000000000284e+01	5.800000000000000000e+01	1.519999999999999929e+01	2.589999999999999858e+01	5.070000000000000284e+01	4.739999999999999858e+01	2.410000000000000142e+01	4.800000000000000000e+01	6.050000000000000000e+01	6.779999999999999716e+01	1.509999999999999964e+01	6.029999999999999716e+01	6.260000000000000142e+01	6.250000000000000000e+01	6.500000000000000000e+01	6.409999999999999432e+01	2.719999999999999929e+01	6.440000000000000568e+01	4.229999999999999716e+01	6.440000000000000568e+01	6.559999999999999432e+01	5.920000000000000284e+01	5.439999999999999858e+01	2.539999999999999858e+01	2.510000000000000142e+01	1.660000000000000142e+01	5.679999999999999716e+01	5.439999999999999858e+01	6.470000000000000284e+01	3.329999999999999716e+01	5.450000000000000000e+01	1.950000000000000000e+01	4.520000000000000284e+01	6.570000000000000284e+01	2.419999999999999929e+01	6.300000000000000000e+01	6.790000000000000568e+01	6.829999999999999716e+01	5.670000000000000284e+01	6.110000000000000142e+01	6.590000000000000568e+01	6.370000000000000284e+01	6.490000000000000568e+01	6.229999999999999716e+01	5.950000000000000000e+01
6.959999999999999432e+01	1.309999999999999964e+01	6.150000000000000000e+01	6.420000000000000284e+01	6.089999999999999858e+01	6.379999999999999716e+01	5.879999999999999716e+01	1.430000000000000071e+01	2.550000000000000000e+01	4.870000000000000284e+01	4.350000000000000000e+01	2.569999999999999929e+01	4.839999999999999858e+01	5.970000000000000284e+01	6.520000000000000284e+01	1.540000000000000036e+01	6.060000000000000142e+01	6.509999999999999432e+01	6.310000000000000142e+01	6.429999999999999716e+01	6.459999999999999432e+01	2.800000000000000000e+01	6.529999999999999716e+01	3.860000000000000142e+01	6.420000000000000284e+01	6.520000000000000284e+01	6.120000000000000284e+01	5.379999999999999716e+01	2.469999999999999929e+01	2.839999999999999858e+01	2.169999999999999929e+01	5.750000000000000000e+01	5.450000000000000000e+01	6.350000000000000000e+01	3.310000000000000142e+01	5.429999999999999716e+01	1.669999999999999929e+01	4.620000000000000284e+01	6.509999999999999432e+01	2.639999999999999858e+01	6.470000000000000284e+01	6.679999999999999716e+01	6.809999999999999432e+01	5.729999999999999716e+01	6.020000000000000284e+01	6.650000000000000000e+01	6.470000000000000284e+01	6.370000000000000284e+01	6.110000000000000142e+01	6.160000000000000142e+01
7.090000000000000568e+01	1.209999999999999964e+01	5.989999999999999858e+01	6.270000000000000284e+01	5.850000000000000000e+01	6.459999999999999432e+01	6.210000000000000142e+01	1.400000000000000000e+01	2.650000000000000000e+01	4.820000000000000284e+01	3.770000000000000284e+01	2.219999999999999929e+01	4.939999999999999858e+01	5.789999999999999858e+01	6.220000000000000284e+01	1.600000000000000000e+01	6.110000000000000142e+01	6.659999999999999432e+01	6.320000000000000284e+01	6.620000000000000284e+01	6.509999999999999432e+01	2.730000000000000071e+01	6.540000000000000568e+01	4.110000000000000142e+01	6.429999999999999716e+01	6.500000000000000000e+01	6.079999999999999716e+01	5.550000000000000000e+01	2.569999999999999929e+01	3.039999999999999858e+01	2.189999999999999858e+01	5.589999999999999858e+01	5.520000000000000284e+01	6.370000000000000284e+01	3.010000000000000142e+01	5.539999999999999858e+01	1.619999999999999929e+01	4.439999999999999858e+01	6.490000000000000568e+01	2.500000000000000000e+01	6.490000000000000568e+01	6.759999999999999432e+01	6.659999999999999432e+01	5.679999999999999716e+01	6.400000000000000000e+01	6.690000000000000568e+01	6.540000000000000568e+01	6.409999999999999432e+01	6.200000000000000000e+01	6.170000000000000284e+01
7.150000000000000000e+01	1.409999999999999964e+01	5.679999999999999716e+01	6.360000000000000142e+01	5.600000000000000000e+01	6.600000000000000000e+01	6.350000000000000000e+01	1.610000000000000142e+01	2.710000000000000142e+01	4.450000000000000000e+01	4.489999999999999858e+01	2.469999999999999929e+01	4.950000000000000000e+01	6.129999999999999716e+01	6.360000000000000142e+01	1.680000000000000071e+01	6.179999999999999716e+01	6.479999999999999716e+01	6.440000000000000568e+01	6.770000000000000284e+01	6.339999999999999858e+01	2.730000000000000071e+01	6.740000000000000568e+01	4.739999999999999858e+01	6.420000000000000284e+01	6.310000000000000142e+01	6.320000000000000284e+01	5.670000000000000284e+01	2.539999999999999858e+01	3.550000000000000000e+01	2.160000000000000142e+01	5.510000000000000142e+01	5.370000000000000284e+01	6.450000000000000000e+01	2.880000000000000071e+01	5.489999999999999858e+01	1.519999999999999929e+01	4.360000000000000142e+01	6.690000000000000568e+01	2.330000000000000071e+01	6.729999999999999716e+01	6.770000000000000284e+01	6.700000000000000000e+01	5.789999999999999858e+01	6.640000000000000568e+01	6.690000000000000568e+01	6.310000000000000142e+01	6.550000000000000000e+01	6.350000000000000000e+01	6.210000000000000142e+01
7.109999999999999432e+01	1.500000000000000000e+01	5.589999999999999858e+01	6.229999999999999716e+01	5.539999999999999858e+01	6.709999999999999432e+01	6.450000000000000000e+01	1.750000000000000000e+01	2.789999999999999858e+01	4.239999999999999858e+01	5.029999999999999716e+01	2.589999999999999858e+01	4.789999999999999858e+01	6.360000000000000142e+01	6.300000000000000000e+01	1.860000000000000142e+01	6.279999999999999716e+01	6.429999999999999716e+01	6.670000000000000284e+01	6.729999999999999716e+01	6.210000000000000142e+01	3.810000000000000142e+01	6.729999999999999716e+01	4.939999999999999858e+01	6.470000000000000284e+01	6.470000000000000284e+01	6.500000000000000000e+01	5.579999999999999716e+01	2.769999999999999929e+01	3.420000000000000284e+01	2.119999999999999929e+01	5.489999999999999858e+01	5.339999999999999858e+01	6.659999999999999432e+01	2.689999999999999858e+01	5.279999999999999716e+01	1.430000000000000071e+01	4.570000000000000284e+01	6.609999999999999432e+01	2.189999999999999858e+01	6.720000000000000284e+01	6.790000000000000568e+01	6.429999999999999716e+01	5.660000000000000142e+01	6.370000000000000284e+01	6.670000000000000284e+01	6.289999999999999858e+01	6.629999999999999716e+01	6.470000000000000284e+01	6.260000000000000142e+01
7.070000000000000284e+01	1.700000000000000000e+01	5.710000000000000142e+01	6.239999999999999858e+01	5.639999999999999858e+01	6.620000000000000284e+01	6.450000000000000000e+01	1.810000000000000142e+01	3.069999999999999929e+01	4.089999999999999858e+01	5.100000000000000000e+01	2.910000000000000142e+01	5.020000000000000284e+01	6.239999999999999858e+01	6.150000000000000000e+01	2.339999999999999858e+01	6.409999999999999432e+01	6.160000000000000142e+01	6.420000000000000284e+01	6.550000000000000000e+01	6.379999999999999716e+01	5.060000000000000142e+01	6.809999999999999432e+01	5.589999999999999858e+01	6.459999999999999432e+01	6.420000000000000284e+01	6.570000000000000284e+01	5.529999999999999716e+01	3.939999999999999858e+01	3.600000000000000000e+01	2.230000000000000071e+01	5.660000000000000142e+01	5.529999999999999716e+01	6.620000000000000284e+01	3.160000000000000142e+01	5.589999999999999858e+01	2.039999999999999858e+01	4.550000000000000000e+01	6.540000000000000568e+01	2.310000000000000142e+01	6.709999999999999432e+01	6.770000000000000284e+01	6.750000000000000000e+01	5.560000000000000142e+01	6.189999999999999858e+01	6.690000000000000568e+01	6.440000000000000568e+01	6.650000000000000000e+01	6.479999999999999716e+01	6.320000000000000284e+01
6.959999999999999432e+01	2.450000000000000000e+01	5.739999999999999858e+01	6.200000000000000000e+01	5.720000000000000284e+01	6.609999999999999432e+01	6.320000000000000284e+01	2.139999999999999858e+01	3.050000000000000000e+01	3.950000000000000000e+01	4.220000000000000284e+01	3.019999999999999929e+01	4.989999999999999858e+01	6.029999999999999716e+01	6.179999999999999716e+01	2.280000000000000071e+01	6.270000000000000284e+01	6.420000000000000284e+01	6.409999999999999432e+01	6.579999999999999716e+01	6.360000000000000142e+01	5.889999999999999858e+01	6.840000000000000568e+01	5.950000000000000000e+01	6.540000000000000568e+01	6.339999999999999858e+01	6.520000000000000284e+01	5.620000000000000284e+01	5.189999999999999858e+01	3.539999999999999858e+01	2.169999999999999929e+01	5.739999999999999858e+01	5.420000000000000284e+01	6.450000000000000000e+01	3.229999999999999716e+01	5.500000000000000000e+01	3.320000000000000284e+01	4.579999999999999716e+01	6.490000000000000568e+01	2.510000000000000142e+01	6.709999999999999432e+01	6.800000000000000000e+01	6.750000000000000000e+01	5.720000000000000284e+01	6.300000000000000000e+01	6.700000000000000000e+01	6.360000000000000142e+01	6.650000000000000000e+01	6.459999999999999432e+01	6.479999999999999716e+01
7.140000000000000568e+01	3.080000000000000071e+01	5.829999999999999716e+01	6.189999999999999858e+01	5.750000000000000000e+01	6.570000000000000284e+01	6.400000000000000000e+01	4.129999999999999716e+01	2.650000000000000000e+01	4.629999999999999716e+01	4.460000000000000142e+01	2.760000000000000142e+01	4.970000000000000284e+01	5.350000000000000000e+01	6.229999999999999716e+01	1.650000000000000000e+01	6.300000000000000000e+01	6.559999999999999432e+01	6.500000000000000000e+01	6.629999999999999716e+01	6.529999999999999716e+01	6.220000000000000284e+01	6.700000000000000000e+01	6.079999999999999716e+01	6.809999999999999432e+01	6.409999999999999432e+01	6.559999999999999432e+01	5.570000000000000284e+01	5.750000000000000000e+01	3.579999999999999716e+01	2.139999999999999858e+01	5.610000000000000142e+01	5.300000000000000000e+01	6.360000000000000142e+01	3.489999999999999858e+01	5.300000000000000000e+01	4.939999999999999858e+01	4.579999999999999716e+01	6.360000000000000142e+01	2.710000000000000142e+01	6.679999999999999716e+01	7.020000000000000284e+01	6.500000000000000000e+01	5.689999999999999858e+01	6.179999999999999716e+01	6.840000000000000568e+01	6.379999999999999716e+01	6.529999999999999716e+01	6.509999999999999432e+01	6.529999999999999716e+01
7.100000000000000000e+01	2.619999999999999929e+01	5.900000000000000000e+01	6.260000000000000142e+01	5.910000000000000142e+01	6.570000000000000284e+01	6.329999999999999716e+01	4.750000000000000000e+01	3.400000000000000000e+01	5.089999999999999858e+01	5.079999999999999716e+01	2.460000000000000142e+01	4.989999999999999858e+01	4.970000000000000284e+01	6.229999999999999716e+01	2.800000000000000000e+01	6.360000000000000142e+01	6.640000000000000568e+01	6.479999999999999716e+01	6.850000000000000000e+01	6.640000000000000568e+01	6.570000000000000284e+01	6.770000000000000284e+01	4.210000000000000142e+01	6.900000000000000000e+01	6.440000000000000568e+01	6.629999999999999716e+01	5.710000000000000142e+01	6.179999999999999716e+01	3.600000000000000000e+01	2.200000000000000000e+01	5.760000000000000142e+01	5.279999999999999716e+01	6.170000000000000284e+01	3.679999999999999716e+01	5.279999999999999716e+01	5.960000000000000142e+01	4.500000000000000000e+01	6.570000000000000284e+01	2.889999999999999858e+01	6.829999999999999716e+01	7.070000000000000284e+01	6.779999999999999716e+01	5.760000000000000142e+01	6.550000000000000000e+01	6.900000000000000000e+01	6.479999999999999716e+01	6.540000000000000568e+01	6.440000000000000568e+01	6.609999999999999432e+01
7.170000000000000284e+01	2.680000000000000071e+01	6.120000000000000284e+01	6.570000000000000284e+01	6.110000000000000142e+01	6.479999999999999716e+01	6.389999999999999858e+01	5.239999999999999858e+01	3.260000000000000142e+01	4.689999999999999858e+01	5.070000000000000284e+01	2.780000000000000071e+01	4.960000000000000142e+01	5.470000000000000284e+01	6.600000000000000000e+01	2.689999999999999858e+01	6.360000000000000142e+01	6.609999999999999432e+01	6.770000000000000284e+01	6.770000000000000284e+01	6.740000000000000568e+01	6.800000000000000000e+01	6.570000000000000284e+01	5.360000000000000142e+01	6.859999999999999432e+01	6.520000000000000284e+01	6.360000000000000142e+01	5.670000000000000284e+01	6.529999999999999716e+01	3.820000000000000284e+01	2.539999999999999858e+01	5.720000000000000284e+01	5.439999999999999858e+01	6.260000000000000142e+01	3.729999999999999716e+01	5.360000000000000142e+01	6.520000000000000284e+01	4.560000000000000142e+01	6.550000000000000000e+01	2.739999999999999858e+01	6.900000000000000000e+01	7.120000000000000284e+01	6.809999999999999432e+01	5.760000000000000142e+01	6.329999999999999716e+01	6.920000000000000284e+01	6.559999999999999432e+01	6.360000000000000142e+01	6.260000000000000142e+01	6.590000000000000568e+01
7.200000000000000000e+01	4.720000000000000284e+01	6.409999999999999432e+01	6.509999999999999432e+01	6.440000000000000568e+01	6.210000000000000142e+01	6.450000000000000000e+01	6.179999999999999716e+01	3.189999999999999858e+01	4.400000000000000000e+01	4.310000000000000142e+01	3.089999999999999858e+01	5.020000000000000284e+01	5.950000000000000000e+01	6.529999999999999716e+01	2.510000000000000142e+01	6.420000000000000284e+01	6.790000000000000568e+01	6.759999999999999432e+01	6.979999999999999716e+01	6.690000000000000568e+01	6.879999999999999716e+01	6.679999999999999716e+01	5.710000000000000142e+01	6.659999999999999432e+01	6.479999999999999716e+01	6.370000000000000284e+01	5.760000000000000142e+01	6.559999999999999432e+01	4.329999999999999716e+01	2.819999999999999929e+01	5.670000000000000284e+01	5.470000000000000284e+01	6.320000000000000284e+01	3.360000000000000142e+01	5.439999999999999858e+01	6.829999999999999716e+01	4.670000000000000284e+01	6.720000000000000284e+01	2.780000000000000071e+01	6.829999999999999716e+01	6.950000000000000000e+01	6.920000000000000284e+01	5.800000000000000000e+01	6.670000000000000284e+01	6.929999999999999716e+01	6.620000000000000284e+01	6.479999999999999716e+01	6.370000000000000284e+01	6.670000000000000284e+01
7.290000000000000568e+01	6.129999999999999716e+01	6.559999999999999432e+01	6.170000000000000284e+01	6.559999999999999432e+01	6.289999999999999858e+01	6.300000000000000000e+01	6.740000000000000568e+01	3.289999999999999858e+01	4.989999999999999858e+01	4.920000000000000284e+01	3.069999999999999929e+01	5.200000000000000000e+01	6.129999999999999716e+01	6.100000000000000000e+01	2.660000000000000142e+01	6.479999999999999716e+01	6.720000000000000284e+01	6.450000000000000000e+01	7.059999999999999432e+01	6.279999999999999716e+01	6.829999999999999716e+01	6.740000000000000568e+01	5.870000000000000284e+01	6.720000000000000284e+01	6.540000000000000568e+01	6.450000000000000000e+01	5.700000000000000000e+01	6.529999999999999716e+01	5.279999999999999716e+01	4.679999999999999716e+01	5.429999999999999716e+01	5.489999999999999858e+01	6.629999999999999716e+01	3.139999999999999858e+01	5.500000000000000000e+01	6.820000000000000284e+01	4.750000000000000000e+01	6.800000000000000000e+01	2.669999999999999929e+01	6.859999999999999432e+01	6.890000000000000568e+01	6.679999999999999716e+01	5.739999999999999858e+01	6.470000000000000284e+01	6.929999999999999716e+01	6.289999999999999858e+01	6.659999999999999432e+01	6.490000000000000568e+01	6.750000000000000000e+01
7.150000000000000000e+01	6.690000000000000568e+01	6.270000000000000284e+01	6.179999999999999716e+01	6.420000000000000284e+01	6.420000000000000284e+01	6.300000000000000000e+01	6.709999999999999432e+01	3.489999999999999858e+01	5.239999999999999858e+01	5.210000000000000142e+01	3.979999999999999716e+01	5.210000000000000142e+01	6.170000000000000284e+01	6.179999999999999716e+01	2.950000000000000000e+01	6.509999999999999432e+01	6.110000000000000142e+01	6.540000000000000568e+01	6.979999999999999716e+01	6.270000000000000284e+01	6.829999999999999716e+01	6.890000000000000568e+01	6.089999999999999858e+01	6.670000000000000284e+01	6.570000000000000284e+01	6.490000000000000568e+01	5.710000000000000142e+01	6.520000000000000284e+01	5.979999999999999716e+01	5.829999999999999716e+01	5.520000000000000284e+01	5.479999999999999716e+01	6.790000000000000568e+01	3.010000000000000142e+01	5.500000000000000000e+01	6.979999999999999716e+01	4.610000000000000142e+01	6.809999999999999432e+01	2.560000000000000142e+01	6.840000000000000568e+01	6.859999999999999432e+01	6.940000000000000568e+01	5.820000000000000284e+01	6.360000000000000142e+01	6.879999999999999716e+01	6.170000000000000284e+01	6.890000000000000568e+01	6.720000000000000284e+01	6.790000000000000568e+01
7.100000000000000000e+01	6.779999999999999716e+01	6.120000000000000284e+01	6.010000000000000142e+01	6.360000000000000142e+01	6.659999999999999432e+01	6.479999999999999716e+01	6.670000000000000284e+01	4.020000000000000284e+01	5.270000000000000284e+01	6.029999999999999716e+01	5.360000000000000142e+01	5.079999999999999716e+01	6.200000000000000000e+01	5.979999999999999716e+01	3.689999999999999858e+01	6.550000000000000000e+01	5.970000000000000284e+01	6.520000000000000284e+01	6.890000000000000568e+01	6.029999999999999716e+01	6.770000000000000284e+01	6.950000000000000000e+01	6.120000000000000284e+01	6.529999999999999716e+01	6.450000000000000000e+01	6.600000000000000000e+01	5.770000000000000284e+01	6.529999999999999716e+01	5.910000000000000142e+01	6.120000000000000284e+01	5.570000000000000284e+01	5.460000000000000142e+01	7.020000000000000284e+01	3.210000000000000142e+01	5.479999999999999716e+01	6.890000000000000568e+01	4.570000000000000284e+01	6.679999999999999716e+01	2.380000000000000071e+01	6.959999999999999432e+01	6.820000000000000284e+01	6.790000000000000568e+01	5.810000000000000142e+01	6.270000000000000284e+01	6.950000000000000000e+01	6.189999999999999858e+01	6.929999999999999716e+01	6.729999999999999716e+01	6.629999999999999716e+01
7.020000000000000284e+01	6.970000000000000284e+01	6.079999999999999716e+01	6.389999999999999858e+01	6.440000000000000568e+01	6.800000000000000000e+01	6.650000000000000000e+01	6.620000000000000284e+01	5.000000000000000000e+01	4.839999999999999858e+01	6.210000000000000142e+01	6.139999999999999858e+01	5.210000000000000142e+01	6.490000000000000568e+01	6.350000000000000000e+01	4.929999999999999716e+01	6.559999999999999432e+01	6.179999999999999716e+01	6.650000000000000000e+01	6.720000000000000284e+01	5.910000000000000142e+01	6.940000000000000568e+01	6.779999999999999716e+01	6.300000000000000000e+01	6.620000000000000284e+01	6.479999999999999716e+01	6.650000000000000000e+01	5.710000000000000142e+01	6.529999999999999716e+01	6.360000000000000142e+01	6.600000000000000000e+01	5.610000000000000142e+01	5.579999999999999716e+01	6.820000000000000284e+01	3.570000000000000284e+01	5.479999999999999716e+01	6.959999999999999432e+01	4.479999999999999716e+01	6.509999999999999432e+01	2.389999999999999858e+01	6.970000000000000284e+01	6.829999999999999716e+01	6.720000000000000284e+01	5.770000000000000284e+01	6.250000000000000000e+01	6.959999999999999432e+01	6.050000000000000000e+01	6.670000000000000284e+01	6.540000000000000568e+01	6.679999999999999716e+01
7.070000000000000284e+01	7.179999999999999716e+01	6.179999999999999716e+01	6.540000000000000568e+01	6.559999999999999432e+01	6.790000000000000568e+01	6.550000000000000000e+01	6.750000000000000000e+01	5.620000000000000284e+01	5.050000000000000000e+01	6.550000000000000000e+01	6.659999999999999432e+01	5.239999999999999858e+01	6.740000000000000568e+01	6.579999999999999716e+01	5.810000000000000142e+01	6.540000000000000568e+01	6.110000000000000142e+01	6.720000000000000284e+01	6.790000000000000568e+01	6.129999999999999716e+01	6.929999999999999716e+01	6.440000000000000568e+01	6.389999999999999858e+01	6.579999999999999716e+01	6.440000000000000568e+01	6.759999999999999432e+01	5.779999999999999716e+01	6.700000000000000000e+01	6.289999999999999858e+01	6.679999999999999716e+01	5.560000000000000142e+01	5.560000000000000142e+01	6.870000000000000284e+01	3.620000000000000284e+01	5.550000000000000000e+01	6.990000000000000568e+01	4.450000000000000000e+01	6.840000000000000568e+01	2.560000000000000142e+01	6.870000000000000284e+01	6.770000000000000284e+01	6.770000000000000284e+01	5.800000000000000000e+01	6.310000000000000142e+01	7.009999999999999432e+01	6.220000000000000284e+01	6.750000000000000000e+01	6.629999999999999716e+01	6.629999999999999716e+01
6.900000000000000000e+01	7.079999999999999716e+01	6.320000000000000284e+01	6.520000000000000284e+01	6.670000000000000284e+01	6.820000000000000284e+01	6.509999999999999432e+01	6.679999999999999716e+01	5.850000000000000000e+01	4.820000000000000284e+01	6.379999999999999716e+01	6.800000000000000000e+01	5.510000000000000142e+01	6.909999999999999432e+01	6.500000000000000000e+01	6.220000000000000284e+01	6.550000000000000000e+01	6.160000000000000142e+01	6.709999999999999432e+01	6.800000000000000000e+01	5.950000000000000000e+01	6.950000000000000000e+01	6.750000000000000000e+01	6.720000000000000284e+01	6.470000000000000284e+01	6.470000000000000284e+01	6.809999999999999432e+01	6.060000000000000142e+01	6.820000000000000284e+01	6.500000000000000000e+01	6.909999999999999432e+01	5.529999999999999716e+01	5.720000000000000284e+01	6.950000000000000000e+01	3.320000000000000284e+01	5.720000000000000284e+01	7.050000000000000000e+01	4.689999999999999858e+01	6.940000000000000568e+01	2.619999999999999929e+01	6.909999999999999432e+01	6.690000000000000568e+01	6.870000000000000284e+01	6.089999999999999858e+01	6.360000000000000142e+01	6.920000000000000284e+01	6.110000000000000142e+01	6.820000000000000284e+01	6.590000000000000568e+01	6.679999999999999716e+01
7.079999999999999716e+01	7.220000000000000284e+01	6.239999999999999858e+01	6.339999999999999858e+01	6.659999999999999432e+01	6.770000000000000284e+01	6.509999999999999432e+01	6.859999999999999432e+01	5.739999999999999858e+01	4.879999999999999716e+01	6.070000000000000284e+01	6.870000000000000284e+01	5.479999999999999716e+01	6.870000000000000284e+01	6.470000000000000284e+01	6.229999999999999716e+01	6.490000000000000568e+01	6.229999999999999716e+01	6.720000000000000284e+01	6.779999999999999716e+01	5.970000000000000284e+01	7.109999999999999432e+01	6.809999999999999432e+01	6.829999999999999716e+01	6.640000000000000568e+01	6.459999999999999432e+01	6.940000000000000568e+01	6.120000000000000284e+01	6.970000000000000284e+01	6.379999999999999716e+01	6.850000000000000000e+01	5.289999999999999858e+01	5.820000000000000284e+01	7.170000000000000284e+01	3.210000000000000142e+01	6.020000000000000284e+01	7.040000000000000568e+01	4.789999999999999858e+01	6.700000000000000000e+01	2.419999999999999929e+01	7.220000000000000284e+01	6.809999999999999432e+01	6.979999999999999716e+01	6.229999999999999716e+01	6.160000000000000142e+01	6.850000000000000000e+01	6.110000000000000142e+01	6.870000000000000284e+01	6.659999999999999432e+01	6.779999999999999716e+01
6.890000000000000568e+01	6.929999999999999716e+01	6.310000000000000142e+01	6.379999999999999716e+01	6.679999999999999716e+01	6.700000000000000000e+01	6.479999999999999716e+01	6.620000000000000284e+01	5.989999999999999858e+01	4.970000000000000284e+01	6.170000000000000284e+01	6.870000000000000284e+01	5.429999999999999716e+01	6.809999999999999432e+01	6.400000000000000000e+01	6.310000000000000142e+01	6.509999999999999432e+01	5.979999999999999716e+01	6.990000000000000568e+01	6.779999999999999716e+01	5.989999999999999858e+01	7.150000000000000000e+01	6.629999999999999716e+01	6.879999999999999716e+01	6.659999999999999432e+01	6.500000000000000000e+01	6.820000000000000284e+01	6.179999999999999716e+01	6.979999999999999716e+01	6.509999999999999432e+01	7.050000000000000000e+01	5.410000000000000142e+01	5.870000000000000284e+01	7.109999999999999432e+01	3.239999999999999858e+01	6.110000000000000142e+01	7.300000000000000000e+01	5.000000000000000000e+01	6.700000000000000000e+01	2.760000000000000142e+01	7.079999999999999716e+01	6.850000000000000000e+01	7.079999999999999716e+01	6.239999999999999858e+01	6.120000000000000284e+01	6.900000000000000000e+01	6.150000000000000000e+01	6.940000000000000568e+01	6.800000000000000000e+01	6.820000000000000284e+01
6.870000000000000284e+01	6.890000000000000568e+01	6.070000000000000284e+01	6.179999999999999716e+01	6.500000000000000000e+01	6.820000000000000284e+01	6.540000000000000568e+01	6.629999999999999716e+01	6.079999999999999716e+01	4.910000000000000142e+01	6.210000000000000142e+01	6.870000000000000284e+01	5.289999999999999858e+01	6.740000000000000568e+01	6.260000000000000142e+01	6.320000000000000284e+01	6.479999999999999716e+01	6.010000000000000142e+01	6.959999999999999432e+01	6.700000000000000000e+01	5.820000000000000284e+01	7.200000000000000000e+01	6.979999999999999716e+01	6.990000000000000568e+01	6.709999999999999432e+01	6.529999999999999716e+01	7.029999999999999716e+01	6.289999999999999858e+01	6.959999999999999432e+01	6.429999999999999716e+01	7.020000000000000284e+01	5.360000000000000142e+01	5.970000000000000284e+01	7.140000000000000568e+01	3.470000000000000284e+01	6.100000000000000000e+01	7.150000000000000000e+01	5.060000000000000142e+01	6.400000000000000000e+01	2.930000000000000071e+01	7.170000000000000284e+01	6.859999999999999432e+01	7.090000000000000568e+01	6.420000000000000284e+01	6.089999999999999858e+01	6.990000000000000568e+01	6.010000000000000142e+01	7.109999999999999432e+01	7.029999999999999716e+01	6.879999999999999716e+01
7.050000000000000000e+01	6.979999999999999716e+01	6.179999999999999716e+01	6.110000000000000142e+01	6.550000000000000000e+01	7.040000000000000568e+01	6.729999999999999716e+01	6.690000000000000568e+01	6.120000000000000284e+01	4.689999999999999858e+01	6.200000000000000000e+01	6.920000000000000284e+01	5.779999999999999716e+01	6.959999999999999432e+01	6.110000000000000142e+01	6.379999999999999716e+01	6.490000000000000568e+01	6.020000000000000284e+01	6.970000000000000284e+01	6.479999999999999716e+01	6.060000000000000142e+01	6.979999999999999716e+01	6.529999999999999716e+01	6.900000000000000000e+01	6.709999999999999432e+01	6.520000000000000284e+01	7.059999999999999432e+01	6.189999999999999858e+01	6.940000000000000568e+01	6.479999999999999716e+01	7.100000000000000000e+01	5.510000000000000142e+01	6.050000000000000000e+01	7.079999999999999716e+01	3.310000000000000142e+01	6.250000000000000000e+01	7.170000000000000284e+01	5.600000000000000000e+01	6.600000000000000000e+01	3.989999999999999858e+01	7.040000000000000568e+01	6.809999999999999432e+01	7.100000000000000000e+01	6.229999999999999716e+01	5.889999999999999858e+01	6.970000000000000284e+01	6.239999999999999858e+01	7.079999999999999716e+01	7.040000000000000568e+01	6.770000000000000284e+01
7.220000000000000284e+01	7.209999999999999432e+01	6.000000000000000000e+01	6.179999999999999716e+01	6.570000000000000284e+01	6.890000000000000568e+01	6.729999999999999716e+01	6.879999999999999716e+01	6.220000000000000284e+01	4.500000000000000000e+01	6.389999999999999858e+01	7.059999999999999432e+01	6.129999999999999716e+01	6.990000000000000568e+01	6.150000000000000000e+01	6.479999999999999716e+01	6.470000000000000284e+01	6.179999999999999716e+01	6.579999999999999716e+01	6.659999999999999432e+01	5.879999999999999716e+01	7.000000000000000000e+01	6.750000000000000000e+01	6.920000000000000284e+01	6.640000000000000568e+01	6.479999999999999716e+01	7.029999999999999716e+01	6.360000000000000142e+01	7.000000000000000000e+01	6.640000000000000568e+01	7.120000000000000284e+01	5.500000000000000000e+01	6.000000000000000000e+01	7.300000000000000000e+01	3.729999999999999716e+01	6.250000000000000000e+01	7.020000000000000284e+01	6.010000000000000142e+01	6.620000000000000284e+01	5.289999999999999858e+01	7.029999999999999716e+01	6.809999999999999432e+01	7.079999999999999716e+01	6.509999999999999432e+01	6.210000000000000142e+01	6.970000000000000284e+01	6.070000000000000284e+01	7.179999999999999716e+01	7.120000000000000284e+01	6.809999999999999432e+01
6.720000000000000284e+01	7.079999999999999716e+01	6.039999999999999858e+01	6.360000000000000142e+01	6.529999999999999716e+01	7.000000000000000000e+01	6.750000000000000000e+01	6.759999999999999432e+01	6.260000000000000142e+01	4.600000000000000000e+01	6.520000000000000284e+01	7.050000000000000000e+01	6.310000000000000142e+01	6.870000000000000284e+01	6.350000000000000000e+01	6.600000000000000000e+01	6.479999999999999716e+01	6.200000000000000000e+01	6.440000000000000568e+01	6.690000000000000568e+01	5.889999999999999858e+01	7.079999999999999716e+01	6.300000000000000000e+01	7.009999999999999432e+01	6.629999999999999716e+01	6.490000000000000568e+01	7.190000000000000568e+01	6.270000000000000284e+01	7.020000000000000284e+01	6.650000000000000000e+01	7.159999999999999432e+01	5.970000000000000284e+01	6.200000000000000000e+01	7.179999999999999716e+01	4.900000000000000000e+01	6.239999999999999858e+01	7.090000000000000568e+01	6.409999999999999432e+01	6.590000000000000568e+01	6.089999999999999858e+01	7.100000000000000000e+01	6.820000000000000284e+01	7.170000000000000284e+01	6.370000000000000284e+01	6.010000000000000142e+01	6.970000000000000284e+01	6.029999999999999716e+01	7.340000000000000568e+01	7.240000000000000568e+01	6.920000000000000284e+01
7.000000000000000000e+01	7.070000000000000284e+01	6.179999999999999716e+01	6.500000000000000000e+01	6.640000000000000568e+01	6.970000000000000284e+01	6.770000000000000284e+01	6.759999999999999432e+01	6.320000000000000284e+01	4.689999999999999858e+01	6.609999999999999432e+01	6.890000000000000568e+01	6.409999999999999432e+01	7.040000000000000568e+01	6.450000000000000000e+01	6.579999999999999716e+01	6.500000000000000000e+01	6.110000000000000142e+01	6.570000000000000284e+01	6.520000000000000284e+01	6.110000000000000142e+01	6.970000000000000284e+01	6.720000000000000284e+01	7.000000000000000000e+01	6.609999999999999432e+01	6.479999999999999716e+01	7.170000000000000284e+01	6.239999999999999858e+01	6.890000000000000568e+01	6.520000000000000284e+01	7.029999999999999716e+01	6.229999999999999716e+01	6.370000000000000284e+01	7.150000000000000000e+01	5.679999999999999716e+01	6.370000000000000284e+01	7.100000000000000000e+01	6.529999999999999716e+01	6.540000000000000568e+01	6.329999999999999716e+01	7.050000000000000000e+01	6.790000000000000568e+01	7.209999999999999432e+01	6.300000000000000000e+01	6.000000000000000000e+01	6.900000000000000000e+01	6.270000000000000284e+01	7.200000000000000000e+01	7.040000000000000568e+01	6.940000000000000568e+01
7.020000000000000284e+01	7.140000000000000568e+01	6.310000000000000142e+01	6.459999999999999432e+01	6.729999999999999716e+01	7.090000000000000568e+01	6.909999999999999432e+01	6.840000000000000568e+01	6.189999999999999858e+01	5.070000000000000284e+01	6.600000000000000000e+01	7.020000000000000284e+01	6.350000000000000000e+01	7.079999999999999716e+01	6.210000000000000142e+01	6.540000000000000568e+01	6.490000000000000568e+01	5.989999999999999858e+01	6.909999999999999432e+01	6.729999999999999716e+01	6.020000000000000284e+01	7.040000000000000568e+01	7.009999999999999432e+01	6.950000000000000000e+01	6.800000000000000000e+01	6.490000000000000568e+01	7.270000000000000284e+01	6.379999999999999716e+01	6.970000000000000284e+01	6.570000000000000284e+01	7.059999999999999432e+01	6.210000000000000142e+01	6.550000000000000000e+01	7.129999999999999716e+01	5.829999999999999716e+01	6.450000000000000000e+01	7.120000000000000284e+01	6.559999999999999432e+01	6.729999999999999716e+01	6.420000000000000284e+01	6.970000000000000284e+01	7.000000000000000000e+01	7.109999999999999432e+01	6.339999999999999858e+01	6.339999999999999858e+01	6.820000000000000284e+01	6.239999999999999858e+01	7.190000000000000568e+01	7.029999999999999716e+01	6.809999999999999432e+01
7.029999999999999716e+01	7.009999999999999432e+01	6.379999999999999716e+01	6.379999999999999716e+01	6.800000000000000000e+01	7.040000000000000568e+01	6.879999999999999716e+01	6.700000000000000000e+01	6.220000000000000284e+01	5.200000000000000000e+01	6.520000000000000284e+01	7.009999999999999432e+01	6.379999999999999716e+01	7.109999999999999432e+01	6.200000000000000000e+01	6.459999999999999432e+01	6.470000000000000284e+01	5.920000000000000284e+01	6.970000000000000284e+01	6.650000000000000000e+01	5.970000000000000284e+01	6.970000000000000284e+01	7.079999999999999716e+01	6.870000000000000284e+01	6.790000000000000568e+01	6.500000000000000000e+01	7.250000000000000000e+01	6.400000000000000000e+01	6.859999999999999432e+01	6.459999999999999432e+01	6.950000000000000000e+01	6.389999999999999858e+01	6.570000000000000284e+01	7.140000000000000568e+01	5.970000000000000284e+01	6.540000000000000568e+01	6.950000000000000000e+01	6.550000000000000000e+01	6.820000000000000284e+01	6.590000000000000568e+01	6.979999999999999716e+01	6.959999999999999432e+01	6.750000000000000000e+01	6.400000000000000000e+01	6.429999999999999716e+01	6.879999999999999716e+01	6.229999999999999716e+01	7.109999999999999432e+01	6.920000000000000284e+01	6.879999999999999716e+01
6.940000000000000568e+01	7.220000000000000284e+01	6.160000000000000142e+01	6.310000000000000142e+01	6.709999999999999432e+01	6.350000000000000000e+01	6.579999999999999716e+01	6.790000000000000568e+01	6.250000000000000000e+01	4.650000000000000000e+01	6.609999999999999432e+01	7.070000000000000284e+01	6.429999999999999716e+01	7.029999999999999716e+01	6.250000000000000000e+01	6.640000000000000568e+01	6.459999999999999432e+01	6.150000000000000000e+01	6.879999999999999716e+01	6.529999999999999716e+01	6.210000000000000142e+01	6.750000000000000000e+01	7.050000000000000000e+01	6.720000000000000284e+01	6.779999999999999716e+01	6.500000000000000000e+01	7.140000000000000568e+01	6.350000000000000000e+01	6.740000000000000568e+01	6.470000000000000284e+01	6.929999999999999716e+01	6.609999999999999432e+01	6.579999999999999716e+01	7.000000000000000000e+01	6.289999999999999858e+01	6.570000000000000284e+01	7.000000000000000000e+01	6.529999999999999716e+01	6.729999999999999716e+01	6.750000000000000000e+01	6.790000000000000568e+01	6.890000000000000568e+01	6.879999999999999716e+01	6.440000000000000568e+01	6.339999999999999858e+01	6.809999999999999432e+01	6.450000000000000000e+01	6.990000000000000568e+01	6.950000000000000000e+01	6.890000000000000568e+01
7.070000000000000284e+01	7.390000000000000568e+01	5.939999999999999858e+01	6.210000000000000142e+01	6.529999999999999716e+01	5.870000000000000284e+01	6.720000000000000284e+01	6.950000000000000000e+01	6.310000000000000142e+01	4.460000000000000142e+01	6.540000000000000568e+01	7.229999999999999716e+01	6.429999999999999716e+01	6.979999999999999716e+01	5.960000000000000142e+01	6.709999999999999432e+01	6.479999999999999716e+01	6.120000000000000284e+01	6.909999999999999432e+01	6.540000000000000568e+01	6.220000000000000284e+01	6.729999999999999716e+01	6.890000000000000568e+01	6.659999999999999432e+01	6.679999999999999716e+01	6.490000000000000568e+01	7.029999999999999716e+01	6.440000000000000568e+01	6.720000000000000284e+01	6.360000000000000142e+01	6.750000000000000000e+01	6.609999999999999432e+01	6.540000000000000568e+01	6.970000000000000284e+01	6.370000000000000284e+01	6.600000000000000000e+01	6.740000000000000568e+01	6.500000000000000000e+01	6.729999999999999716e+01	6.750000000000000000e+01	6.779999999999999716e+01	6.850000000000000000e+01	6.950000000000000000e+01	6.490000000000000568e+01	6.289999999999999858e+01	6.809999999999999432e+01	6.440000000000000568e+01	6.950000000000000000e+01	6.929999999999999716e+01	6.809999999999999432e+01
6.929999999999999716e+01	7.390000000000000568e+01	5.950000000000000000e+01	6.310000000000000142e+01	6.500000000000000000e+01	6.220000000000000284e+01	6.800000000000000000e+01	6.900000000000000000e+01	6.310000000000000142e+01	4.739999999999999858e+01	6.740000000000000568e+01	7.340000000000000568e+01	6.459999999999999432e+01	7.009999999999999432e+01	6.250000000000000000e+01	6.729999999999999716e+01	6.459999999999999432e+01	5.970000000000000284e+01	6.970000000000000284e+01	6.600000000000000000e+01	6.079999999999999716e+01	6.829999999999999716e+01	6.890000000000000568e+01	6.620000000000000284e+01	6.690000000000000568e+01	6.500000000000000000e+01	6.979999999999999716e+01	6.459999999999999432e+01	6.779999999999999716e+01	6.409999999999999432e+01	6.809999999999999432e+01	6.650000000000000000e+01	6.500000000000000000e+01	6.690000000000000568e+01	6.370000000000000284e+01	6.479999999999999716e+01	6.740000000000000568e+01	6.509999999999999432e+01	6.659999999999999432e+01	6.840000000000000568e+01	6.820000000000000284e+01	6.879999999999999716e+01	6.959999999999999432e+01	6.490000000000000568e+01	6.200000000000000000e+01	6.890000000000000568e+01	6.200000000000000000e+01	6.970000000000000284e+01	6.959999999999999432e+01	6.859999999999999432e+01
6.870000000000000284e+01	7.159999999999999432e+01	6.170000000000000284e+01	6.379999999999999716e+01	6.609999999999999432e+01	6.570000000000000284e+01	6.840000000000000568e+01	6.690000000000000568e+01	6.320000000000000284e+01	4.570000000000000284e+01	6.740000000000000568e+01	7.140000000000000568e+01	6.459999999999999432e+01	7.020000000000000284e+01	6.279999999999999716e+01	6.709999999999999432e+01	6.479999999999999716e+01	6.089999999999999858e+01	6.950000000000000000e+01	6.570000000000000284e+01	6.310000000000000142e+01	6.609999999999999432e+01	6.600000000000000000e+01	6.529999999999999716e+01	6.679999999999999716e+01	6.479999999999999716e+01	6.950000000000000000e+01	6.440000000000000568e+01	6.529999999999999716e+01	6.559999999999999432e+01	7.040000000000000568e+01	6.850000000000000000e+01	6.329999999999999716e+01	6.790000000000000568e+01	6.559999999999999432e+01	6.409999999999999432e+01	6.690000000000000568e+01	6.500000000000000000e+01	6.470000000000000284e+01	6.800000000000000000e+01	6.679999999999999716e+01	6.900000000000000000e+01	6.959999999999999432e+01	6.470000000000000284e+01	5.989999999999999858e+01	6.750000000000000000e+01	6.459999999999999432e+01	7.029999999999999716e+01	7.050000000000000000e+01	6.829999999999999716e+01
6.940000000000000568e+01	7.190000000000000568e+01	6.250000000000000000e+01	6.440000000000000568e+01	6.659999999999999432e+01	6.829999999999999716e+01	6.909999999999999432e+01	6.659999999999999432e+01	6.189999999999999858e+01	4.279999999999999716e+01	6.940000000000000568e+01	7.059999999999999432e+01	6.420000000000000284e+01	7.000000000000000000e+01	6.520000000000000284e+01	6.559999999999999432e+01	6.459999999999999432e+01	6.289999999999999858e+01	7.090000000000000568e+01	6.729999999999999716e+01	6.189999999999999858e+01	6.579999999999999716e+01	6.570000000000000284e+01	6.500000000000000000e+01	6.829999999999999716e+01	6.500000000000000000e+01	7.100000000000000000e+01	6.470000000000000284e+01	6.559999999999999432e+01	6.370000000000000284e+01	6.759999999999999432e+01	6.840000000000000568e+01	6.420000000000000284e+01	6.979999999999999716e+01	6.479999999999999716e+01	6.479999999999999716e+01	6.729999999999999716e+01	6.500000000000000000e+01	6.559999999999999432e+01	6.950000000000000000e+01	6.620000000000000284e+01	7.000000000000000000e+01	6.929999999999999716e+01	6.509999999999999432e+01	6.170000000000000284e+01	6.750000000000000000e+01	6.440000000000000568e+01	7.070000000000000284e+01	7.129999999999999716e+01	6.840000000000000568e+01
6.700000000000000000e+01	7.150000000000000000e+01	6.279999999999999716e+01	6.540000000000000568e+01	6.670000000000000284e+01	6.970000000000000284e+01	6.970000000000000284e+01	6.620000000000000284e+01	6.220000000000000284e+01	4.300000000000000000e+01	6.729999999999999716e+01	7.109999999999999432e+01	6.420000000000000284e+01	7.000000000000000000e+01	6.650000000000000000e+01	6.590000000000000568e+01	6.440000000000000568e+01	6.129999999999999716e+01	6.940000000000000568e+01	6.820000000000000284e+01	6.300000000000000000e+01	6.620000000000000284e+01	6.679999999999999716e+01	6.379999999999999716e+01	6.670000000000000284e+01	6.509999999999999432e+01	6.940000000000000568e+01	6.479999999999999716e+01	6.700000000000000000e+01	6.429999999999999716e+01	6.900000000000000000e+01	6.670000000000000284e+01	6.470000000000000284e+01	7.009999999999999432e+01	6.310000000000000142e+01	6.529999999999999716e+01	6.600000000000000000e+01	6.500000000000000000e+01	6.629999999999999716e+01	6.840000000000000568e+01	6.700000000000000000e+01	6.859999999999999432e+01	6.479999999999999716e+01	6.540000000000000568e+01	6.420000000000000284e+01	6.670000000000000284e+01	6.429999999999999716e+01	6.950000000000000000e+01	6.940000000000000568e+01	6.859999999999999432e+01
6.850000000000000000e+01	7.070000000000000284e+01	6.060000000000000142e+01	6.559999999999999432e+01	6.550000000000000000e+01	6.970000000000000284e+01	6.959999999999999432e+01	6.609999999999999432e+01	6.220000000000000284e+01	4.420000000000000284e+01	6.600000000000000000e+01	7.070000000000000284e+01	6.440000000000000568e+01	7.120000000000000284e+01	6.529999999999999716e+01	6.520000000000000284e+01	6.450000000000000000e+01	6.070000000000000284e+01	6.909999999999999432e+01	6.809999999999999432e+01	6.160000000000000142e+01	6.659999999999999432e+01	6.940000000000000568e+01	6.450000000000000000e+01	6.690000000000000568e+01	6.509999999999999432e+01	6.990000000000000568e+01	6.529999999999999716e+01	6.759999999999999432e+01	6.370000000000000284e+01	6.690000000000000568e+01	6.670000000000000284e+01	6.529999999999999716e+01	6.970000000000000284e+01	6.370000000000000284e+01	6.540000000000000568e+01	6.629999999999999716e+01	6.509999999999999432e+01	6.579999999999999716e+01	6.670000000000000284e+01	6.770000000000000284e+01	6.900000000000000000e+01	6.650000000000000000e+01	6.520000000000000284e+01	6.350000000000000000e+01	6.800000000000000000e+01	6.350000000000000000e+01	7.029999999999999716e+01	7.079999999999999716e+01	7.020000000000000284e+01
6.559999999999999432e+01	7.290000000000000568e+01	5.900000000000000000e+01	6.220000000000000284e+01	6.450000000000000000e+01	7.020000000000000284e+01	6.890000000000000568e+01	6.720000000000000284e+01	6.250000000000000000e+01	4.889999999999999858e+01	6.590000000000000568e+01	7.150000000000000000e+01	6.429999999999999716e+01	7.220000000000000284e+01	6.129999999999999716e+01	6.679999999999999716e+01	6.470000000000000284e+01	5.900000000000000000e+01	7.129999999999999716e+01	6.740000000000000568e+01	6.129999999999999716e+01	6.700000000000000000e+01	6.729999999999999716e+01	6.459999999999999432e+01	6.809999999999999432e+01	6.509999999999999432e+01	6.959999999999999432e+01	6.540000000000000568e+01	6.700000000000000000e+01	6.389999999999999858e+01	6.779999999999999716e+01	6.620000000000000284e+01	6.490000000000000568e+01	6.850000000000000000e+01	6.479999999999999716e+01	6.509999999999999432e+01	6.840000000000000568e+01	6.520000000000000284e+01	6.600000000000000000e+01	6.900000000000000000e+01	6.640000000000000568e+01	6.979999999999999716e+01	6.870000000000000284e+01	6.520000000000000284e+01	6.229999999999999716e+01	6.729999999999999716e+01	6.320000000000000284e+01	7.020000000000000284e+01	6.970000000000000284e+01	7.000000000000000000e+01
6.459999999999999432e+01	6.990000000000000568e+01	5.760000000000000142e+01	6.350000000000000000e+01	6.400000000000000000e+01	7.029999999999999716e+01	6.809999999999999432e+01	6.550000000000000000e+01	6.189999999999999858e+01	5.079999999999999716e+01	6.579999999999999716e+01	7.000000000000000000e+01	6.509999999999999432e+01	7.150000000000000000e+01	6.620000000000000284e+01	6.650000000000000000e+01	6.479999999999999716e+01	5.860000000000000142e+01	6.959999999999999432e+01	6.590000000000000568e+01	6.300000000000000000e+01	6.729999999999999716e+01	6.990000000000000568e+01	6.529999999999999716e+01	6.940000000000000568e+01	6.500000000000000000e+01	6.970000000000000284e+01	6.550000000000000000e+01	6.779999999999999716e+01	6.360000000000000142e+01	6.629999999999999716e+01	6.820000000000000284e+01	6.440000000000000568e+01	6.950000000000000000e+01	6.620000000000000284e+01	6.420000000000000284e+01	6.859999999999999432e+01	6.500000000000000000e+01	6.420000000000000284e+01	6.909999999999999432e+01	6.679999999999999716e+01	7.100000000000000000e+01	6.959999999999999432e+01	6.550000000000000000e+01	6.060000000000000142e+01	6.679999999999999716e+01	6.520000000000000284e+01	7.050000000000000000e+01	6.990000000000000568e+01	6.990000000000000568e+01
6.590000000000000568e+01	6.909999999999999432e+01	5.900000000000000000e+01	6.089999999999999858e+01	6.490000000000000568e+01	7.150000000000000000e+01	6.909999999999999432e+01	6.609999999999999432e+01	6.150000000000000000e+01	4.720000000000000284e+01	6.320000000000000284e+01	6.940000000000000568e+01	6.500000000000000000e+01	7.050000000000000000e+01	6.220000000000000284e+01	6.550000000000000000e+01	6.470000000000000284e+01	6.329999999999999716e+01	6.759999999999999432e+01	6.679999999999999716e+01	6.210000000000000142e+01	6.479999999999999716e+01	6.970000000000000284e+01	6.520000000000000284e+01	6.959999999999999432e+01	6.509999999999999432e+01	6.959999999999999432e+01	6.479999999999999716e+01	6.490000000000000568e+01	6.350000000000000000e+01	6.750000000000000000e+01	6.720000000000000284e+01	6.389999999999999858e+01	6.929999999999999716e+01	6.690000000000000568e+01	6.440000000000000568e+01	6.620000000000000284e+01	6.500000000000000000e+01	6.420000000000000284e+01	6.920000000000000284e+01	6.590000000000000568e+01	7.120000000000000284e+01	6.820000000000000284e+01	6.450000000000000000e+01	6.360000000000000142e+01	6.590000000000000568e+01	6.450000000000000000e+01	7.070000000000000284e+01	7.079999999999999716e+01	7.040000000000000568e+01
6.820000000000000284e+01	7.109999999999999432e+01	5.389999999999999858e+01	5.879999999999999716e+01	6.170000000000000284e+01	6.890000000000000568e+01	6.809999999999999432e+01	6.770000000000000284e+01	6.200000000000000000e+01	4.889999999999999858e+01	6.600000000000000000e+01	7.029999999999999716e+01	6.500000000000000000e+01	7.090000000000000568e+01	5.860000000000000142e+01	6.590000000000000568e+01	6.470000000000000284e+01	6.350000000000000000e+01	6.879999999999999716e+01	6.750000000000000000e+01	6.029999999999999716e+01	6.420000000000000284e+01	7.059999999999999432e+01	6.500000000000000000e+01	6.870000000000000284e+01	6.500000000000000000e+01	7.000000000000000000e+01	6.490000000000000568e+01	6.609999999999999432e+01	6.150000000000000000e+01	6.609999999999999432e+01	6.620000000000000284e+01	6.450000000000000000e+01	7.170000000000000284e+01	6.400000000000000000e+01	6.520000000000000284e+01	6.570000000000000284e+01	6.520000000000000284e+01	6.459999999999999432e+01	6.740000000000000568e+01	6.670000000000000284e+01	7.040000000000000568e+01	6.920000000000000284e+01	6.520000000000000284e+01	6.590000000000000568e+01	6.690000000000000568e+01	6.250000000000000000e+01	7.179999999999999716e+01	7.209999999999999432e+01	6.940000000000000568e+01
6.800000000000000000e+01	7.379999999999999716e+01	6.360000000000000142e+01	6.120000000000000284e+01	6.809999999999999432e+01	6.850000000000000000e+01	6.840000000000000568e+01	6.859999999999999432e+01	6.260000000000000142e+01	5.500000000000000000e+01	6.659999999999999432e+01	7.190000000000000568e+01	6.550000000000000000e+01	7.079999999999999716e+01	5.970000000000000284e+01	6.740000000000000568e+01	6.470000000000000284e+01	6.200000000000000000e+01	6.800000000000000000e+01	6.770000000000000284e+01	6.060000000000000142e+01	6.490000000000000568e+01	7.009999999999999432e+01	6.509999999999999432e+01	6.779999999999999716e+01	6.500000000000000000e+01	6.990000000000000568e+01	6.509999999999999432e+01	6.590000000000000568e+01	6.160000000000000142e+01	6.579999999999999716e+01	6.520000000000000284e+01	6.470000000000000284e+01	7.120000000000000284e+01	6.479999999999999716e+01	6.559999999999999432e+01	6.550000000000000000e+01	6.500000000000000000e+01	6.490000000000000568e+01	6.859999999999999432e+01	6.459999999999999432e+01	6.979999999999999716e+01	7.029999999999999716e+01	6.520000000000000284e+01	6.409999999999999432e+01	6.570000000000000284e+01	6.239999999999999858e+01	7.179999999999999716e+01	7.109999999999999432e+01	6.959999999999999432e+01
7.070000000000000284e+01	7.340000000000000568e+01	6.300000000000000000e+01	5.950000000000000000e+01	6.740000000000000568e+01	6.979999999999999716e+01	6.979999999999999716e+01	6.940000000000000568e+01	6.360000000000000142e+01	5.070000000000000284e+01	6.770000000000000284e+01	7.209999999999999432e+01	6.559999999999999432e+01	7.240000000000000568e+01	5.920000000000000284e+01	6.770000000000000284e+01	6.479999999999999716e+01	5.939999999999999858e+01	6.850000000000000000e+01	6.720000000000000284e+01	6.100000000000000000e+01	6.420000000000000284e+01	7.040000000000000568e+01	6.500000000000000000e+01	6.800000000000000000e+01	6.479999999999999716e+01	7.000000000000000000e+01	6.529999999999999716e+01	6.500000000000000000e+01	6.270000000000000284e+01	6.579999999999999716e+01	6.740000000000000568e+01	6.459999999999999432e+01	7.070000000000000284e+01	6.609999999999999432e+01	6.490000000000000568e+01	6.450000000000000000e+01	6.450000000000000000e+01	6.609999999999999432e+01	6.790000000000000568e+01	6.389999999999999858e+01	6.959999999999999432e+01	6.970000000000000284e+01	6.500000000000000000e+01	6.200000000000000000e+01	6.659999999999999432e+01	6.320000000000000284e+01	7.140000000000000568e+01	7.070000000000000284e+01	6.940000000000000568e+01
6.979999999999999716e+01	7.379999999999999716e+01	6.210000000000000142e+01	6.429999999999999716e+01	6.640000000000000568e+01	6.629999999999999716e+01	6.979999999999999716e+01	6.900000000000000000e+01	6.389999999999999858e+01	5.220000000000000284e+01	6.459999999999999432e+01	7.240000000000000568e+01	6.579999999999999716e+01	7.190000000000000568e+01	6.450000000000000000e+01	6.790000000000000568e+01	6.479999999999999716e+01	5.939999999999999858e+01	7.000000000000000000e+01	6.700000000000000000e+01	6.229999999999999716e+01	5.779999999999999716e+01	6.709999999999999432e+01	6.289999999999999858e+01	6.890000000000000568e+01	6.490000000000000568e+01	7.029999999999999716e+01	6.529999999999999716e+01	6.360000000000000142e+01	6.200000000000000000e+01	6.579999999999999716e+01	6.800000000000000000e+01	6.470000000000000284e+01	7.179999999999999716e+01	6.659999999999999432e+01	6.490000000000000568e+01	6.270000000000000284e+01	6.470000000000000284e+01	6.590000000000000568e+01	6.990000000000000568e+01	6.470000000000000284e+01	7.009999999999999432e+01	6.979999999999999716e+01	6.520000000000000284e+01	5.939999999999999858e+01	6.620000000000000284e+01	6.370000000000000284e+01	7.029999999999999716e+01	7.129999999999999716e+01	7.040000000000000568e+01
6.809999999999999432e+01	7.350000000000000000e+01	6.409999999999999432e+01	6.529999999999999716e+01	6.779999999999999716e+01	6.700000000000000000e+01	6.850000000000000000e+01	6.900000000000000000e+01	6.270000000000000284e+01	4.979999999999999716e+01	6.509999999999999432e+01	7.300000000000000000e+01	6.550000000000000000e+01	7.200000000000000000e+01	6.740000000000000568e+01	6.779999999999999716e+01	6.470000000000000284e+01	6.260000000000000142e+01	7.040000000000000568e+01	6.759999999999999432e+01	6.459999999999999432e+01	4.789999999999999858e+01	7.000000000000000000e+01	6.400000000000000000e+01	6.859999999999999432e+01	6.490000000000000568e+01	7.050000000000000000e+01	6.509999999999999432e+01	5.250000000000000000e+01	6.300000000000000000e+01	6.400000000000000000e+01	6.859999999999999432e+01	6.490000000000000568e+01	7.229999999999999716e+01	6.550000000000000000e+01	6.500000000000000000e+01	6.179999999999999716e+01	6.500000000000000000e+01	6.770000000000000284e+01	6.979999999999999716e+01	6.600000000000000000e+01	6.950000000000000000e+01	6.909999999999999432e+01	6.520000000000000284e+01	6.089999999999999858e+01	6.679999999999999716e+01	6.650000000000000000e+01	7.090000000000000568e+01	7.170000000000000284e+01	6.920000000000000284e+01
6.920000000000000284e+01	7.300000000000000000e+01	6.379999999999999716e+01	6.740000000000000568e+01	6.740000000000000568e+01	6.759999999999999432e+01	6.779999999999999716e+01	6.890000000000000568e+01	6.450000000000000000e+01	4.729999999999999716e+01	6.310000000000000142e+01	7.379999999999999716e+01	6.570000000000000284e+01	7.000000000000000000e+01	6.920000000000000284e+01	6.870000000000000284e+01	6.479999999999999716e+01	6.459999999999999432e+01	7.259999999999999432e+01	7.070000000000000284e+01	6.300000000000000000e+01	5.850000000000000000e+01	7.390000000000000568e+01	6.450000000000000000e+01	6.909999999999999432e+01	6.500000000000000000e+01	7.079999999999999716e+01	6.529999999999999716e+01	5.960000000000000142e+01	6.079999999999999716e+01	6.400000000000000000e+01	6.729999999999999716e+01	6.490000000000000568e+01	7.209999999999999432e+01	6.590000000000000568e+01	6.379999999999999716e+01	5.850000000000000000e+01	6.500000000000000000e+01	6.870000000000000284e+01	7.000000000000000000e+01	6.450000000000000000e+01	7.059999999999999432e+01	6.920000000000000284e+01	6.509999999999999432e+01	6.370000000000000284e+01	6.850000000000000000e+01	6.609999999999999432e+01	7.240000000000000568e+01	7.309999999999999432e+01	6.879999999999999716e+01
7.109999999999999432e+01	7.209999999999999432e+01	6.189999999999999858e+01	6.700000000000000000e+01	6.620000000000000284e+01	6.820000000000000284e+01	6.840000000000000568e+01	6.840000000000000568e+01	6.350000000000000000e+01	4.379999999999999716e+01	6.620000000000000284e+01	7.190000000000000568e+01	6.550000000000000000e+01	7.000000000000000000e+01	6.790000000000000568e+01	6.770000000000000284e+01	6.490000000000000568e+01	6.300000000000000000e+01	7.000000000000000000e+01	6.990000000000000568e+01	6.409999999999999432e+01	6.160000000000000142e+01	7.259999999999999432e+01	6.459999999999999432e+01	6.820000000000000284e+01	6.490000000000000568e+01	7.000000000000000000e+01	6.450000000000000000e+01	6.270000000000000284e+01	6.139999999999999858e+01	6.520000000000000284e+01	6.790000000000000568e+01	6.500000000000000000e+01	7.009999999999999432e+01	6.579999999999999716e+01	6.450000000000000000e+01	5.960000000000000142e+01	6.479999999999999716e+01	6.940000000000000568e+01	6.890000000000000568e+01	6.339999999999999858e+01	7.029999999999999716e+01	6.470000000000000284e+01	6.500000000000000000e+01	6.289999999999999858e+01	6.879999999999999716e+01	6.829999999999999716e+01	7.129999999999999716e+01	7.100000000000000000e+01	6.800000000000000000e+01
7.150000000000000000e+01	7.350000000000000000e+01	6.279999999999999716e+01	6.490000000000000568e+01	6.729999999999999716e+01	6.850000000000000000e+01	6.870000000000000284e+01	6.990000000000000568e+01	6.320000000000000284e+01	4.370000000000000284e+01	6.320000000000000284e+01	7.179999999999999716e+01	6.520000000000000284e+01	6.970000000000000284e+01	6.770000000000000284e+01	6.829999999999999716e+01	6.479999999999999716e+01	6.339999999999999858e+01	7.129999999999999716e+01	6.879999999999999716e+01	6.400000000000000000e+01	6.379999999999999716e+01	7.309999999999999432e+01	6.479999999999999716e+01	6.820000000000000284e+01	6.479999999999999716e+01	6.959999999999999432e+01	6.479999999999999716e+01	6.520000000000000284e+01	6.120000000000000284e+01	6.420000000000000284e+01	6.790000000000000568e+01	6.490000000000000568e+01	6.759999999999999432e+01	6.709999999999999432e+01	6.470000000000000284e+01	6.229999999999999716e+01	6.479999999999999716e+01	6.840000000000000568e+01	6.879999999999999716e+01	6.379999999999999716e+01	7.050000000000000000e+01	6.790000000000000568e+01	6.500000000000000000e+01	6.409999999999999432e+01	6.879999999999999716e+01	6.790000000000000568e+01	6.959999999999999432e+01	6.859999999999999432e+01	6.820000000000000284e+01
7.140000000000000568e+01	7.229999999999999716e+01	6.329999999999999716e+01	6.300000000000000000e+01	6.820000000000000284e+01	6.820000000000000284e+01	6.709999999999999432e+01	7.020000000000000284e+01	6.229999999999999716e+01	4.760000000000000142e+01	6.360000000000000142e+01	7.200000000000000000e+01	6.529999999999999716e+01	6.929999999999999716e+01	6.559999999999999432e+01	6.790000000000000568e+01	6.479999999999999716e+01	6.409999999999999432e+01	7.150000000000000000e+01	6.870000000000000284e+01	6.420000000000000284e+01	6.559999999999999432e+01	6.690000000000000568e+01	6.479999999999999716e+01	6.770000000000000284e+01	6.490000000000000568e+01	6.909999999999999432e+01	6.490000000000000568e+01	6.579999999999999716e+01	5.970000000000000284e+01	6.360000000000000142e+01	6.840000000000000568e+01	6.490000000000000568e+01	6.950000000000000000e+01	6.779999999999999716e+01	6.470000000000000284e+01	6.250000000000000000e+01	6.500000000000000000e+01	6.840000000000000568e+01	7.000000000000000000e+01	6.670000000000000284e+01	7.040000000000000568e+01	6.770000000000000284e+01	6.490000000000000568e+01	6.370000000000000284e+01	6.779999999999999716e+01	6.709999999999999432e+01	6.909999999999999432e+01	6.809999999999999432e+01	6.870000000000000284e+01
7.229999999999999716e+01	7.520000000000000284e+01	6.270000000000000284e+01	6.389999999999999858e+01	6.629999999999999716e+01	6.840000000000000568e+01	6.720000000000000284e+01	7.140000000000000568e+01	6.370000000000000284e+01	5.310000000000000142e+01	6.440000000000000568e+01	7.300000000000000000e+01	6.550000000000000000e+01	6.950000000000000000e+01	6.429999999999999716e+01	6.820000000000000284e+01	6.490000000000000568e+01	6.260000000000000142e+01	7.270000000000000284e+01	7.059999999999999432e+01	6.440000000000000568e+01	6.729999999999999716e+01	7.129999999999999716e+01	6.470000000000000284e+01	6.790000000000000568e+01	6.500000000000000000e+01	6.929999999999999716e+01	6.500000000000000000e+01	6.720000000000000284e+01	5.979999999999999716e+01	6.590000000000000568e+01	6.879999999999999716e+01	6.479999999999999716e+01	6.800000000000000000e+01	6.690000000000000568e+01	6.500000000000000000e+01	6.459999999999999432e+01	6.490000000000000568e+01	6.920000000000000284e+01	6.990000000000000568e+01	6.829999999999999716e+01	7.050000000000000000e+01	6.950000000000000000e+01	6.500000000000000000e+01	6.450000000000000000e+01	6.850000000000000000e+01	6.609999999999999432e+01	6.900000000000000000e+01	6.909999999999999432e+01	6.879999999999999716e+01
7.059999999999999432e+01	7.190000000000000568e+01	6.339999999999999858e+01	6.540000000000000568e+01	6.700000000000000000e+01	6.920000000000000284e+01	6.809999999999999432e+01	6.929999999999999716e+01	6.420000000000000284e+01	4.860000000000000142e+01	6.300000000000000000e+01	7.229999999999999716e+01	6.559999999999999432e+01	7.029999999999999716e+01	6.570000000000000284e+01	6.909999999999999432e+01	6.459999999999999432e+01	6.440000000000000568e+01	7.300000000000000000e+01	7.129999999999999716e+01	6.559999999999999432e+01	6.709999999999999432e+01	7.279999999999999716e+01	6.420000000000000284e+01	6.940000000000000568e+01	6.479999999999999716e+01	6.940000000000000568e+01	6.509999999999999432e+01	6.720000000000000284e+01	6.239999999999999858e+01	6.709999999999999432e+01	7.050000000000000000e+01	6.520000000000000284e+01	7.070000000000000284e+01	6.850000000000000000e+01	6.529999999999999716e+01	6.670000000000000284e+01	6.479999999999999716e+01	6.809999999999999432e+01	7.079999999999999716e+01	6.570000000000000284e+01	7.190000000000000568e+01	7.040000000000000568e+01	6.509999999999999432e+01	6.490000000000000568e+01	6.909999999999999432e+01	6.940000000000000568e+01	6.929999999999999716e+01	6.929999999999999716e+01	6.790000000000000568e+01
7.200000000000000000e+01	7.370000000000000284e+01	6.559999999999999432e+01	6.409999999999999432e+01	6.890000000000000568e+01	6.970000000000000284e+01	7.070000000000000284e+01	6.920000000000000284e+01	6.500000000000000000e+01	4.660000000000000142e+01	6.389999999999999858e+01	7.159999999999999432e+01	6.559999999999999432e+01	7.150000000000000000e+01	6.440000000000000568e+01	6.859999999999999432e+01	6.490000000000000568e+01	6.509999999999999432e+01	7.290000000000000568e+01	7.179999999999999716e+01	6.520000000000000284e+01	6.740000000000000568e+01	7.300000000000000000e+01	6.170000000000000284e+01	6.779999999999999716e+01	6.479999999999999716e+01	6.940000000000000568e+01	6.520000000000000284e+01	6.790000000000000568e+01	6.089999999999999858e+01	6.500000000000000000e+01	6.809999999999999432e+01	6.420000000000000284e+01	7.300000000000000000e+01	6.770000000000000284e+01	6.420000000000000284e+01	6.429999999999999716e+01	6.470000000000000284e+01	6.990000000000000568e+01	7.059999999999999432e+01	6.690000000000000568e+01	7.170000000000000284e+01	6.950000000000000000e+01	6.529999999999999716e+01	6.509999999999999432e+01	6.870000000000000284e+01	6.870000000000000284e+01	6.970000000000000284e+01	6.900000000000000000e+01	6.840000000000000568e+01
7.250000000000000000e+01	7.379999999999999716e+01	6.579999999999999716e+01	6.629999999999999716e+01	6.900000000000000000e+01	7.129999999999999716e+01	7.020000000000000284e+01	6.979999999999999716e+01	6.440000000000000568e+01	4.429999999999999716e+01	6.490000000000000568e+01	7.200000000000000000e+01	6.579999999999999716e+01	7.240000000000000568e+01	6.690000000000000568e+01	6.900000000000000000e+01	6.479999999999999716e+01	6.370000000000000284e+01	7.009999999999999432e+01	7.050000000000000000e+01	6.420000000000000284e+01	6.920000000000000284e+01	7.290000000000000568e+01	6.320000000000000284e+01	6.750000000000000000e+01	6.490000000000000568e+01	6.970000000000000284e+01	6.479999999999999716e+01	6.909999999999999432e+01	5.879999999999999716e+01	6.509999999999999432e+01	6.959999999999999432e+01	6.470000000000000284e+01	7.100000000000000000e+01	6.729999999999999716e+01	6.450000000000000000e+01	6.690000000000000568e+01	6.509999999999999432e+01	6.909999999999999432e+01	7.129999999999999716e+01	6.879999999999999716e+01	7.020000000000000284e+01	6.350000000000000000e+01	6.520000000000000284e+01	6.479999999999999716e+01	6.970000000000000284e+01	6.709999999999999432e+01	7.040000000000000568e+01	7.040000000000000568e+01	6.900000000000000000e+01
7.240000000000000568e+01	7.309999999999999432e+01	6.650000000000000000e+01	6.279999999999999716e+01	6.929999999999999716e+01	7.059999999999999432e+01	7.020000000000000284e+01	6.979999999999999716e+01	6.339999999999999858e+01	4.600000000000000000e+01	6.820000000000000284e+01	7.379999999999999716e+01	6.570000000000000284e+01	7.029999999999999716e+01	6.170000000000000284e+01	6.890000000000000568e+01	6.479999999999999716e+01	6.450000000000000000e+01	7.150000000000000000e+01	6.979999999999999716e+01	6.620000000000000284e+01	6.920000000000000284e+01	7.340000000000000568e+01	6.400000000000000000e+01	6.700000000000000000e+01	6.490000000000000568e+01	6.940000000000000568e+01	6.509999999999999432e+01	6.990000000000000568e+01	6.200000000000000000e+01	6.759999999999999432e+01	7.040000000000000568e+01	6.500000000000000000e+01	6.909999999999999432e+01	6.870000000000000284e+01	6.490000000000000568e+01	6.720000000000000284e+01	6.500000000000000000e+01	6.940000000000000568e+01	7.200000000000000000e+01	7.000000000000000000e+01	7.029999999999999716e+01	6.729999999999999716e+01	6.520000000000000284e+01	6.229999999999999716e+01	6.990000000000000568e+01	6.840000000000000568e+01	7.070000000000000284e+01	6.990000000000000568e+01	6.900000000000000000e+01
7.290000000000000568e+01	7.459999999999999432e+01	6.270000000000000284e+01	6.559999999999999432e+01	6.659999999999999432e+01	6.990000000000000568e+01	6.990000000000000568e+01	7.229999999999999716e+01	6.440000000000000568e+01	4.610000000000000142e+01	6.570000000000000284e+01	7.359999999999999432e+01	6.529999999999999716e+01	7.090000000000000568e+01	6.770000000000000284e+01	6.840000000000000568e+01	6.500000000000000000e+01	6.479999999999999716e+01	7.209999999999999432e+01	7.270000000000000284e+01	6.520000000000000284e+01	6.829999999999999716e+01	7.370000000000000284e+01	6.450000000000000000e+01	6.720000000000000284e+01	6.490000000000000568e+01	6.990000000000000568e+01	6.529999999999999716e+01	6.840000000000000568e+01	6.160000000000000142e+01	6.700000000000000000e+01	6.950000000000000000e+01	6.500000000000000000e+01	6.979999999999999716e+01	6.809999999999999432e+01	6.529999999999999716e+01	6.640000000000000568e+01	6.470000000000000284e+01	6.920000000000000284e+01	7.179999999999999716e+01	6.790000000000000568e+01	7.050000000000000000e+01	6.929999999999999716e+01	6.520000000000000284e+01	6.529999999999999716e+01	7.040000000000000568e+01	6.909999999999999432e+01	7.070000000000000284e+01	7.009999999999999432e+01	6.850000000000000000e+01
7.259999999999999432e+01	7.500000000000000000e+01	6.339999999999999858e+01	6.929999999999999716e+01	6.800000000000000000e+01	6.890000000000000568e+01	6.800000000000000000e+01	7.129999999999999716e+01	6.670000000000000284e+01	4.479999999999999716e+01	6.459999999999999432e+01	7.470000000000000284e+01	5.720000000000000284e+01	6.709999999999999432e+01	7.140000000000000568e+01	6.959999999999999432e+01	6.490000000000000568e+01	6.490000000000000568e+01	7.200000000000000000e+01	7.209999999999999432e+01	6.559999999999999432e+01	6.990000000000000568e+01	7.300000000000000000e+01	6.470000000000000284e+01	6.870000000000000284e+01	6.490000000000000568e+01	7.029999999999999716e+01	6.529999999999999716e+01	6.890000000000000568e+01	6.170000000000000284e+01	6.690000000000000568e+01	6.929999999999999716e+01	6.490000000000000568e+01	7.059999999999999432e+01	6.829999999999999716e+01	6.490000000000000568e+01	6.620000000000000284e+01	6.470000000000000284e+01	7.050000000000000000e+01	7.100000000000000000e+01	6.800000000000000000e+01	7.090000000000000568e+01	6.990000000000000568e+01	6.520000000000000284e+01	6.440000000000000568e+01	6.859999999999999432e+01	6.840000000000000568e+01	7.059999999999999432e+01	7.120000000000000284e+01	6.979999999999999716e+01
7.220000000000000284e+01	7.640000000000000568e+01	6.909999999999999432e+01	6.829999999999999716e+01	7.090000000000000568e+01	6.879999999999999716e+01	6.920000000000000284e+01	7.240000000000000568e+01	6.609999999999999432e+01	4.420000000000000284e+01	6.759999999999999432e+01	7.659999999999999432e+01	5.079999999999999716e+01	7.000000000000000000e+01	6.909999999999999432e+01	7.079999999999999716e+01	6.490000000000000568e+01	6.400000000000000000e+01	7.190000000000000568e+01	7.140000000000000568e+01	6.300000000000000000e+01	7.090000000000000568e+01	7.290000000000000568e+01	6.479999999999999716e+01	6.759999999999999432e+01	6.490000000000000568e+01	6.829999999999999716e+01	6.509999999999999432e+01	6.829999999999999716e+01	6.279999999999999716e+01	6.590000000000000568e+01	6.890000000000000568e+01	6.500000000000000000e+01	7.029999999999999716e+01	6.800000000000000000e+01	6.490000000000000568e+01	6.709999999999999432e+01	6.490000000000000568e+01	7.079999999999999716e+01	7.009999999999999432e+01	6.679999999999999716e+01	7.090000000000000568e+01	6.850000000000000000e+01	6.500000000000000000e+01	6.440000000000000568e+01	6.950000000000000000e+01	6.509999999999999432e+01	6.890000000000000568e+01	6.959999999999999432e+01	6.920000000000000284e+01
7.150000000000000000e+01	7.740000000000000568e+01	6.900000000000000000e+01	6.679999999999999716e+01	7.050000000000000000e+01	7.170000000000000284e+01	7.100000000000000000e+01	7.050000000000000000e+01	6.550000000000000000e+01	4.839999999999999858e+01	6.620000000000000284e+01	7.479999999999999716e+01	4.850000000000000000e+01	7.129999999999999716e+01	6.829999999999999716e+01	7.109999999999999432e+01	6.490000000000000568e+01	6.229999999999999716e+01	6.979999999999999716e+01	7.050000000000000000e+01	6.370000000000000284e+01	6.850000000000000000e+01	7.440000000000000568e+01	6.479999999999999716e+01	6.609999999999999432e+01	6.490000000000000568e+01	7.009999999999999432e+01	6.500000000000000000e+01	6.700000000000000000e+01	6.339999999999999858e+01	6.800000000000000000e+01	6.820000000000000284e+01	6.540000000000000568e+01	7.040000000000000568e+01	6.600000000000000000e+01	6.440000000000000568e+01	6.650000000000000000e+01	6.509999999999999432e+01	6.979999999999999716e+01	6.820000000000000284e+01	6.700000000000000000e+01	6.829999999999999716e+01	6.820000000000000284e+01	6.490000000000000568e+01	6.409999999999999432e+01	6.890000000000000568e+01	6.579999999999999716e+01	7.150000000000000000e+01	7.209999999999999432e+01	6.600000000000000000e+01
7.129999999999999716e+01	7.509999999999999432e+01	7.100000000000000000e+01	6.350000000000000000e+01	7.150000000000000000e+01	7.000000000000000000e+01	6.890000000000000568e+01	7.070000000000000284e+01	6.559999999999999432e+01	4.470000000000000284e+01	6.239999999999999858e+01	7.459999999999999432e+01	4.700000000000000000e+01	7.170000000000000284e+01	6.289999999999999858e+01	7.040000000000000568e+01	6.500000000000000000e+01	6.220000000000000284e+01	6.879999999999999716e+01	7.090000000000000568e+01	6.189999999999999858e+01	6.779999999999999716e+01	7.340000000000000568e+01	6.509999999999999432e+01	6.479999999999999716e+01	6.500000000000000000e+01	6.990000000000000568e+01	6.529999999999999716e+01	6.740000000000000568e+01	6.350000000000000000e+01	6.650000000000000000e+01	6.709999999999999432e+01	6.529999999999999716e+01	7.000000000000000000e+01	6.490000000000000568e+01	6.470000000000000284e+01	6.609999999999999432e+01	6.490000000000000568e+01	7.100000000000000000e+01	6.700000000000000000e+01	6.600000000000000000e+01	6.740000000000000568e+01	6.900000000000000000e+01	6.490000000000000568e+01	6.509999999999999432e+01	6.959999999999999432e+01	6.459999999999999432e+01	7.150000000000000000e+01	7.020000000000000284e+01	6.759999999999999432e+01
7.100000000000000000e+01	7.229999999999999716e+01	6.550000000000000000e+01	6.590000000000000568e+01	6.859999999999999432e+01	7.009999999999999432e+01	6.929999999999999716e+01	6.990000000000000568e+01	6.310000000000000142e+01	4.110000000000000142e+01	5.720000000000000284e+01	7.279999999999999716e+01	5.039999999999999858e+01	7.020000000000000284e+01	6.670000000000000284e+01	6.679999999999999716e+01	6.500000000000000000e+01	6.020000000000000284e+01	7.090000000000000568e+01	6.920000000000000284e+01	6.270000000000000284e+01	6.890000000000000568e+01	7.340000000000000568e+01	6.490000000000000568e+01	6.690000000000000568e+01	6.500000000000000000e+01	6.950000000000000000e+01	6.509999999999999432e+01	6.690000000000000568e+01	6.050000000000000000e+01	6.479999999999999716e+01	6.820000000000000284e+01	6.500000000000000000e+01	7.090000000000000568e+01	6.540000000000000568e+01	6.479999999999999716e+01	6.490000000000000568e+01	6.490000000000000568e+01	6.979999999999999716e+01	6.829999999999999716e+01	6.729999999999999716e+01	6.920000000000000284e+01	6.920000000000000284e+01	6.490000000000000568e+01	6.239999999999999858e+01	6.990000000000000568e+01	6.620000000000000284e+01	7.070000000000000284e+01	6.920000000000000284e+01	6.890000000000000568e+01
6.909999999999999432e+01	7.250000000000000000e+01	6.400000000000000000e+01	6.620000000000000284e+01	6.750000000000000000e+01	6.940000000000000568e+01	6.800000000000000000e+01	6.959999999999999432e+01	6.409999999999999432e+01	4.550000000000000000e+01	5.289999999999999858e+01	7.309999999999999432e+01	5.820000000000000284e+01	6.970000000000000284e+01	6.709999999999999432e+01	6.829999999999999716e+01	6.509999999999999432e+01	6.229999999999999716e+01	7.109999999999999432e+01	6.979999999999999716e+01	6.420000000000000284e+01	6.800000000000000000e+01	7.350000000000000000e+01	6.500000000000000000e+01	6.850000000000000000e+01	6.500000000000000000e+01	7.050000000000000000e+01	6.509999999999999432e+01	6.600000000000000000e+01	6.360000000000000142e+01	6.790000000000000568e+01	6.709999999999999432e+01	6.509999999999999432e+01	7.009999999999999432e+01	6.700000000000000000e+01	6.500000000000000000e+01	6.600000000000000000e+01	6.479999999999999716e+01	7.009999999999999432e+01	6.979999999999999716e+01	6.620000000000000284e+01	7.040000000000000568e+01	6.850000000000000000e+01	6.490000000000000568e+01	6.479999999999999716e+01	6.900000000000000000e+01	6.770000000000000284e+01	7.100000000000000000e+01	6.929999999999999716e+01	6.920000000000000284e+01
6.959999999999999432e+01	6.970000000000000284e+01	6.470000000000000284e+01	6.350000000000000000e+01	6.900000000000000000e+01	6.920000000000000284e+01	6.670000000000000284e+01	6.679999999999999716e+01	6.420000000000000284e+01	3.779999999999999716e+01	4.860000000000000142e+01	7.079999999999999716e+01	6.220000000000000284e+01	7.070000000000000284e+01	6.540000000000000568e+01	6.709999999999999432e+01	6.500000000000000000e+01	6.409999999999999432e+01	7.140000000000000568e+01	7.279999999999999716e+01	6.389999999999999858e+01	6.690000000000000568e+01	7.250000000000000000e+01	6.490000000000000568e+01	6.770000000000000284e+01	6.500000000000000000e+01	7.000000000000000000e+01	6.509999999999999432e+01	6.690000000000000568e+01	6.279999999999999716e+01	6.500000000000000000e+01	6.729999999999999716e+01	6.509999999999999432e+01	7.320000000000000284e+01	6.590000000000000568e+01	6.479999999999999716e+01	6.509999999999999432e+01	6.500000000000000000e+01	7.079999999999999716e+01	6.959999999999999432e+01	6.750000000000000000e+01	6.990000000000000568e+01	6.940000000000000568e+01	6.500000000000000000e+01	6.570000000000000284e+01	7.040000000000000568e+01	6.720000000000000284e+01	6.970000000000000284e+01	6.879999999999999716e+01	6.820000000000000284e+01
7.000000000000000000e+01	7.170000000000000284e+01	6.279999999999999716e+01	6.110000000000000142e+01	6.720000000000000284e+01	6.850000000000000000e+01	6.790000000000000568e+01	6.920000000000000284e+01	6.440000000000000568e+01	3.450000000000000000e+01	5.820000000000000284e+01	7.200000000000000000e+01	6.440000000000000568e+01	7.029999999999999716e+01	6.220000000000000284e+01	6.879999999999999716e+01	6.500000000000000000e+01	6.129999999999999716e+01	7.029999999999999716e+01	7.150000000000000000e+01	6.310000000000000142e+01	6.700000000000000000e+01	7.259999999999999432e+01	6.490000000000000568e+01	6.100000000000000000e+01	6.450000000000000000e+01	6.920000000000000284e+01	6.520000000000000284e+01	6.729999999999999716e+01	6.379999999999999716e+01	6.500000000000000000e+01	6.690000000000000568e+01	6.490000000000000568e+01	7.200000000000000000e+01	6.500000000000000000e+01	6.490000000000000568e+01	6.600000000000000000e+01	6.470000000000000284e+01	7.040000000000000568e+01	6.990000000000000568e+01	6.609999999999999432e+01	6.790000000000000568e+01	6.959999999999999432e+01	6.479999999999999716e+01	6.529999999999999716e+01	7.050000000000000000e+01	6.609999999999999432e+01	7.050000000000000000e+01	7.020000000000000284e+01	6.840000000000000568e+01
7.090000000000000568e+01	7.320000000000000284e+01	6.070000000000000284e+01	6.020000000000000284e+01	6.559999999999999432e+01	6.840000000000000568e+01	6.750000000000000000e+01	7.100000000000000000e+01	6.479999999999999716e+01	3.620000000000000284e+01	6.220000000000000284e+01	7.159999999999999432e+01	6.520000000000000284e+01	7.150000000000000000e+01	6.270000000000000284e+01	6.809999999999999432e+01	6.509999999999999432e+01	6.170000000000000284e+01	6.959999999999999432e+01	6.979999999999999716e+01	6.370000000000000284e+01	6.550000000000000000e+01	7.390000000000000568e+01	6.490000000000000568e+01	6.409999999999999432e+01	6.470000000000000284e+01	6.979999999999999716e+01	6.509999999999999432e+01	6.590000000000000568e+01	5.970000000000000284e+01	6.360000000000000142e+01	6.740000000000000568e+01	6.490000000000000568e+01	7.250000000000000000e+01	6.500000000000000000e+01	6.490000000000000568e+01	6.310000000000000142e+01	6.520000000000000284e+01	6.820000000000000284e+01	7.079999999999999716e+01	6.500000000000000000e+01	6.900000000000000000e+01	6.879999999999999716e+01	6.509999999999999432e+01	6.360000000000000142e+01	7.050000000000000000e+01	6.720000000000000284e+01	6.990000000000000568e+01	7.079999999999999716e+01	6.909999999999999432e+01
7.090000000000000568e+01	7.390000000000000568e+01	6.540000000000000568e+01	6.289999999999999858e+01	6.850000000000000000e+01	6.850000000000000000e+01	6.720000000000000284e+01	6.940000000000000568e+01	6.500000000000000000e+01	5.039999999999999858e+01	6.189999999999999858e+01	7.250000000000000000e+01	6.459999999999999432e+01	7.250000000000000000e+01	6.200000000000000000e+01	6.950000000000000000e+01	6.500000000000000000e+01	6.039999999999999858e+01	7.100000000000000000e+01	6.940000000000000568e+01	6.279999999999999716e+01	6.609999999999999432e+01	7.309999999999999432e+01	6.490000000000000568e+01	6.579999999999999716e+01	6.490000000000000568e+01	6.879999999999999716e+01	6.509999999999999432e+01	6.509999999999999432e+01	5.960000000000000142e+01	6.310000000000000142e+01	6.900000000000000000e+01	6.500000000000000000e+01	6.979999999999999716e+01	6.720000000000000284e+01	6.470000000000000284e+01	6.509999999999999432e+01	6.509999999999999432e+01	6.720000000000000284e+01	7.159999999999999432e+01	6.429999999999999716e+01	6.929999999999999716e+01	7.009999999999999432e+01	6.500000000000000000e+01	6.320000000000000284e+01	6.879999999999999716e+01	6.579999999999999716e+01	6.920000000000000284e+01	7.009999999999999432e+01	6.809999999999999432e+01
7.309999999999999432e+01	7.550000000000000000e+01	6.320000000000000284e+01	6.250000000000000000e+01	6.770000000000000284e+01	6.379999999999999716e+01	6.850000000000000000e+01	7.100000000000000000e+01	6.289999999999999858e+01	4.800000000000000000e+01	6.670000000000000284e+01	7.300000000000000000e+01	6.400000000000000000e+01	7.140000000000000568e+01	6.550000000000000000e+01	6.800000000000000000e+01	6.500000000000000000e+01	6.509999999999999432e+01	7.129999999999999716e+01	6.929999999999999716e+01	6.500000000000000000e+01	6.609999999999999432e+01	7.129999999999999716e+01	6.490000000000000568e+01	6.790000000000000568e+01	6.500000000000000000e+01	6.909999999999999432e+01	6.509999999999999432e+01	6.529999999999999716e+01	5.970000000000000284e+01	6.450000000000000000e+01	6.920000000000000284e+01	6.529999999999999716e+01	6.929999999999999716e+01	6.750000000000000000e+01	6.490000000000000568e+01	6.370000000000000284e+01	6.529999999999999716e+01	6.959999999999999432e+01	7.200000000000000000e+01	6.729999999999999716e+01	7.029999999999999716e+01	6.990000000000000568e+01	6.490000000000000568e+01	6.609999999999999432e+01	6.859999999999999432e+01	6.750000000000000000e+01	6.900000000000000000e+01	6.990000000000000568e+01	6.890000000000000568e+01
7.050000000000000000e+01	7.559999999999999432e+01	6.729999999999999716e+01	6.220000000000000284e+01	6.870000000000000284e+01	6.770000000000000284e+01	6.870000000000000284e+01	7.129999999999999716e+01	6.590000000000000568e+01	4.629999999999999716e+01	6.650000000000000000e+01	7.459999999999999432e+01	6.459999999999999432e+01	7.200000000000000000e+01	6.750000000000000000e+01	7.070000000000000284e+01	6.500000000000000000e+01	6.550000000000000000e+01	7.320000000000000284e+01	7.140000000000000568e+01	6.450000000000000000e+01	6.729999999999999716e+01	7.320000000000000284e+01	6.490000000000000568e+01	6.890000000000000568e+01	6.500000000000000000e+01	6.929999999999999716e+01	6.490000000000000568e+01	6.640000000000000568e+01	6.050000000000000000e+01	6.320000000000000284e+01	6.970000000000000284e+01	6.509999999999999432e+01	6.840000000000000568e+01	6.779999999999999716e+01	6.479999999999999716e+01	6.720000000000000284e+01	6.520000000000000284e+01	7.009999999999999432e+01	7.359999999999999432e+01	6.779999999999999716e+01	7.100000000000000000e+01	6.909999999999999432e+01	6.479999999999999716e+01	6.640000000000000568e+01	6.929999999999999716e+01	6.679999999999999716e+01	6.870000000000000284e+01	6.820000000000000284e+01	6.870000000000000284e+01
6.890000000000000568e+01	7.420000000000000284e+01	6.770000000000000284e+01	6.479999999999999716e+01	6.909999999999999432e+01	6.809999999999999432e+01	6.979999999999999716e+01	7.150000000000000000e+01	6.300000000000000000e+01	3.260000000000000142e+01	6.750000000000000000e+01	7.400000000000000000e+01	6.520000000000000284e+01	7.250000000000000000e+01	6.800000000000000000e+01	6.890000000000000568e+01	6.500000000000000000e+01	6.450000000000000000e+01	7.150000000000000000e+01	7.059999999999999432e+01	6.550000000000000000e+01	6.790000000000000568e+01	7.209999999999999432e+01	6.490000000000000568e+01	6.850000000000000000e+01	6.490000000000000568e+01	6.890000000000000568e+01	6.490000000000000568e+01	6.720000000000000284e+01	6.089999999999999858e+01	6.550000000000000000e+01	6.950000000000000000e+01	6.500000000000000000e+01	7.059999999999999432e+01	6.950000000000000000e+01	6.479999999999999716e+01	6.529999999999999716e+01	6.509999999999999432e+01	6.779999999999999716e+01	7.390000000000000568e+01	6.620000000000000284e+01	7.120000000000000284e+01	6.879999999999999716e+01	6.470000000000000284e+01	6.640000000000000568e+01	6.770000000000000284e+01	6.929999999999999716e+01	7.000000000000000000e+01	6.879999999999999716e+01	6.909999999999999432e+01
7.070000000000000284e+01	7.200000000000000000e+01	6.879999999999999716e+01	6.779999999999999716e+01	6.950000000000000000e+01	7.109999999999999432e+01	7.100000000000000000e+01	6.959999999999999432e+01	6.370000000000000284e+01	3.600000000000000000e+01	6.770000000000000284e+01	7.200000000000000000e+01	6.389999999999999858e+01	7.090000000000000568e+01	6.940000000000000568e+01	6.759999999999999432e+01	6.490000000000000568e+01	6.490000000000000568e+01	7.120000000000000284e+01	7.209999999999999432e+01	6.490000000000000568e+01	6.970000000000000284e+01	7.209999999999999432e+01	6.490000000000000568e+01	6.859999999999999432e+01	6.490000000000000568e+01	6.779999999999999716e+01	6.490000000000000568e+01	6.640000000000000568e+01	5.989999999999999858e+01	6.470000000000000284e+01	6.779999999999999716e+01	6.520000000000000284e+01	6.950000000000000000e+01	6.950000000000000000e+01	6.490000000000000568e+01	6.490000000000000568e+01	6.509999999999999432e+01	6.840000000000000568e+01	7.240000000000000568e+01	6.750000000000000000e+01	7.000000000000000000e+01	6.429999999999999716e+01	6.479999999999999716e+01	6.600000000000000000e+01	6.859999999999999432e+01	6.720000000000000284e+01	6.920000000000000284e+01	6.870000000000000284e+01	6.840000000000000568e+01
7.040000000000000568e+01	6.929999999999999716e+01	6.929999999999999716e+01	6.859999999999999432e+01	7.100000000000000000e+01	6.670000000000000284e+01	7.029999999999999716e+01	6.750000000000000000e+01	6.350000000000000000e+01	3.069999999999999929e+01	6.690000000000000568e+01	7.120000000000000284e+01	6.079999999999999716e+01	6.970000000000000284e+01	6.929999999999999716e+01	6.729999999999999716e+01	6.490000000000000568e+01	6.479999999999999716e+01	7.170000000000000284e+01	7.209999999999999432e+01	6.650000000000000000e+01	6.870000000000000284e+01	7.329999999999999716e+01	6.509999999999999432e+01	6.850000000000000000e+01	6.490000000000000568e+01	6.890000000000000568e+01	6.490000000000000568e+01	6.540000000000000568e+01	6.220000000000000284e+01	6.729999999999999716e+01	7.140000000000000568e+01	6.500000000000000000e+01	7.090000000000000568e+01	7.070000000000000284e+01	6.479999999999999716e+01	6.529999999999999716e+01	6.509999999999999432e+01	6.900000000000000000e+01	7.500000000000000000e+01	6.520000000000000284e+01	7.070000000000000284e+01	6.640000000000000568e+01	6.479999999999999716e+01	6.490000000000000568e+01	6.770000000000000284e+01	7.040000000000000568e+01	7.129999999999999716e+01	7.040000000000000568e+01	6.959999999999999432e+01
7.190000000000000568e+01	6.970000000000000284e+01	6.270000000000000284e+01	6.690000000000000568e+01	5.870000000000000284e+01	6.959999999999999432e+01	7.129999999999999716e+01	6.770000000000000284e+01	6.279999999999999716e+01	3.160000000000000142e+01	6.590000000000000568e+01	7.170000000000000284e+01	5.379999999999999716e+01	6.900000000000000000e+01	6.779999999999999716e+01	6.740000000000000568e+01	6.490000000000000568e+01	6.529999999999999716e+01	7.259999999999999432e+01	7.259999999999999432e+01	7.090000000000000568e+01	6.750000000000000000e+01	7.420000000000000284e+01	6.500000000000000000e+01	6.929999999999999716e+01	6.490000000000000568e+01	6.990000000000000568e+01	6.490000000000000568e+01	6.450000000000000000e+01	6.150000000000000000e+01	6.479999999999999716e+01	7.240000000000000568e+01	6.500000000000000000e+01	7.009999999999999432e+01	7.309999999999999432e+01	6.490000000000000568e+01	6.050000000000000000e+01	6.500000000000000000e+01	7.170000000000000284e+01	7.500000000000000000e+01	6.909999999999999432e+01	7.090000000000000568e+01	6.620000000000000284e+01	6.479999999999999716e+01	6.600000000000000000e+01	7.029999999999999716e+01	7.429999999999999716e+01	7.079999999999999716e+01	6.950000000000000000e+01	6.940000000000000568e+01
6.870000000000000284e+01	7.050000000000000000e+01	6.540000000000000568e+01	6.160000000000000142e+01	5.789999999999999858e+01	6.900000000000000000e+01	6.840000000000000568e+01	6.800000000000000000e+01	6.239999999999999858e+01	3.180000000000000071e+01	6.440000000000000568e+01	7.120000000000000284e+01	5.150000000000000000e+01	6.750000000000000000e+01	5.639999999999999858e+01	6.600000000000000000e+01	6.500000000000000000e+01	6.940000000000000568e+01	7.220000000000000284e+01	7.409999999999999432e+01	6.770000000000000284e+01	6.729999999999999716e+01	7.220000000000000284e+01	6.509999999999999432e+01	6.929999999999999716e+01	6.490000000000000568e+01	6.859999999999999432e+01	6.500000000000000000e+01	6.640000000000000568e+01	6.129999999999999716e+01	6.620000000000000284e+01	7.090000000000000568e+01	6.500000000000000000e+01	6.920000000000000284e+01	7.079999999999999716e+01	6.490000000000000568e+01	6.429999999999999716e+01	6.509999999999999432e+01	7.150000000000000000e+01	7.490000000000000568e+01	6.790000000000000568e+01	7.090000000000000568e+01	6.759999999999999432e+01	6.500000000000000000e+01	6.740000000000000568e+01	6.900000000000000000e+01	6.970000000000000284e+01	6.990000000000000568e+01	6.829999999999999716e+01	6.790000000000000568e+01
7.059999999999999432e+01	6.809999999999999432e+01	5.960000000000000142e+01	5.900000000000000000e+01	5.670000000000000284e+01	7.090000000000000568e+01	7.029999999999999716e+01	6.620000000000000284e+01	6.420000000000000284e+01	3.910000000000000142e+01	5.620000000000000284e+01	7.140000000000000568e+01	5.500000000000000000e+01	6.570000000000000284e+01	5.339999999999999858e+01	6.679999999999999716e+01	6.490000000000000568e+01	6.490000000000000568e+01	7.350000000000000000e+01	7.329999999999999716e+01	7.100000000000000000e+01	6.770000000000000284e+01	7.270000000000000284e+01	6.509999999999999432e+01	6.940000000000000568e+01	6.490000000000000568e+01	6.870000000000000284e+01	6.500000000000000000e+01	6.690000000000000568e+01	6.089999999999999858e+01	6.329999999999999716e+01	7.159999999999999432e+01	6.509999999999999432e+01	7.129999999999999716e+01	7.159999999999999432e+01	6.479999999999999716e+01	6.210000000000000142e+01	6.490000000000000568e+01	6.950000000000000000e+01	7.529999999999999716e+01	6.650000000000000000e+01	7.079999999999999716e+01	6.729999999999999716e+01	6.509999999999999432e+01	6.529999999999999716e+01	6.920000000000000284e+01	7.379999999999999716e+01	7.009999999999999432e+01	6.950000000000000000e+01	6.779999999999999716e+01
7.279999999999999716e+01	7.290000000000000568e+01	6.289999999999999858e+01	6.189999999999999858e+01	6.329999999999999716e+01	6.840000000000000568e+01	6.950000000000000000e+01	6.829999999999999716e+01	6.450000000000000000e+01	4.229999999999999716e+01	5.260000000000000142e+01	7.220000000000000284e+01	5.579999999999999716e+01	6.570000000000000284e+01	6.160000000000000142e+01	6.640000000000000568e+01	6.500000000000000000e+01	6.690000000000000568e+01	7.200000000000000000e+01	7.109999999999999432e+01	6.950000000000000000e+01	6.759999999999999432e+01	7.190000000000000568e+01	6.520000000000000284e+01	6.720000000000000284e+01	6.500000000000000000e+01	6.909999999999999432e+01	6.509999999999999432e+01	6.679999999999999716e+01	6.279999999999999716e+01	6.490000000000000568e+01	7.120000000000000284e+01	6.500000000000000000e+01	7.040000000000000568e+01	7.040000000000000568e+01	6.500000000000000000e+01	6.110000000000000142e+01	6.500000000000000000e+01	6.970000000000000284e+01	7.379999999999999716e+01	6.590000000000000568e+01	6.929999999999999716e+01	6.829999999999999716e+01	6.529999999999999716e+01	6.509999999999999432e+01	6.890000000000000568e+01	7.150000000000000000e+01	6.979999999999999716e+01	6.950000000000000000e+01	6.640000000000000568e+01
7.220000000000000284e+01	7.229999999999999716e+01	5.960000000000000142e+01	6.300000000000000000e+01	6.279999999999999716e+01	6.770000000000000284e+01	6.709999999999999432e+01	6.829999999999999716e+01	6.509999999999999432e+01	4.529999999999999716e+01	6.000000000000000000e+01	7.220000000000000284e+01	5.629999999999999716e+01	6.840000000000000568e+01	6.690000000000000568e+01	6.820000000000000284e+01	6.490000000000000568e+01	6.409999999999999432e+01	6.959999999999999432e+01	7.300000000000000000e+01	6.679999999999999716e+01	6.700000000000000000e+01	7.209999999999999432e+01	6.520000000000000284e+01	6.770000000000000284e+01	6.500000000000000000e+01	6.870000000000000284e+01	6.520000000000000284e+01	6.479999999999999716e+01	6.210000000000000142e+01	6.520000000000000284e+01	6.959999999999999432e+01	6.500000000000000000e+01	6.950000000000000000e+01	6.950000000000000000e+01	6.509999999999999432e+01	6.150000000000000000e+01	6.500000000000000000e+01	6.979999999999999716e+01	7.270000000000000284e+01	6.890000000000000568e+01	6.940000000000000568e+01	6.890000000000000568e+01	6.520000000000000284e+01	6.659999999999999432e+01	6.720000000000000284e+01	6.929999999999999716e+01	6.879999999999999716e+01	6.759999999999999432e+01	6.770000000000000284e+01
7.070000000000000284e+01	7.109999999999999432e+01	5.989999999999999858e+01	6.629999999999999716e+01	6.400000000000000000e+01	7.040000000000000568e+01	6.920000000000000284e+01	6.890000000000000568e+01	6.379999999999999716e+01	4.300000000000000000e+01	6.450000000000000000e+01	7.259999999999999432e+01	5.610000000000000142e+01	6.959999999999999432e+01	7.150000000000000000e+01	6.740000000000000568e+01	6.500000000000000000e+01	6.300000000000000000e+01	7.150000000000000000e+01	7.100000000000000000e+01	6.650000000000000000e+01	6.900000000000000000e+01	7.240000000000000568e+01	6.509999999999999432e+01	6.790000000000000568e+01	6.500000000000000000e+01	6.759999999999999432e+01	6.520000000000000284e+01	6.709999999999999432e+01	6.250000000000000000e+01	6.670000000000000284e+01	6.950000000000000000e+01	6.500000000000000000e+01	6.929999999999999716e+01	7.020000000000000284e+01	6.500000000000000000e+01	6.379999999999999716e+01	6.500000000000000000e+01	6.820000000000000284e+01	7.490000000000000568e+01	6.529999999999999716e+01	7.009999999999999432e+01	6.950000000000000000e+01	6.520000000000000284e+01	6.490000000000000568e+01	6.820000000000000284e+01	6.979999999999999716e+01	6.909999999999999432e+01	6.720000000000000284e+01	6.790000000000000568e+01
7.209999999999999432e+01	7.190000000000000568e+01	6.110000000000000142e+01	6.579999999999999716e+01	6.550000000000000000e+01	7.120000000000000284e+01	7.120000000000000284e+01	7.050000000000000000e+01	6.409999999999999432e+01	4.339999999999999858e+01	6.640000000000000568e+01	7.250000000000000000e+01	5.560000000000000142e+01	7.140000000000000568e+01	7.159999999999999432e+01	6.800000000000000000e+01	6.500000000000000000e+01	6.440000000000000568e+01	7.259999999999999432e+01	7.079999999999999716e+01	6.540000000000000568e+01	6.670000000000000284e+01	7.240000000000000568e+01	6.500000000000000000e+01	6.779999999999999716e+01	6.500000000000000000e+01	6.929999999999999716e+01	6.500000000000000000e+01	6.479999999999999716e+01	5.829999999999999716e+01	6.350000000000000000e+01	6.770000000000000284e+01	6.490000000000000568e+01	6.809999999999999432e+01	6.840000000000000568e+01	6.500000000000000000e+01	6.010000000000000142e+01	6.500000000000000000e+01	6.909999999999999432e+01	7.200000000000000000e+01	6.859999999999999432e+01	6.929999999999999716e+01	6.840000000000000568e+01	6.509999999999999432e+01	6.420000000000000284e+01	6.870000000000000284e+01	6.790000000000000568e+01	6.950000000000000000e+01	6.870000000000000284e+01	6.700000000000000000e+01
7.079999999999999716e+01	7.379999999999999716e+01	6.270000000000000284e+01	6.779999999999999716e+01	6.679999999999999716e+01	6.720000000000000284e+01	6.870000000000000284e+01	6.859999999999999432e+01	6.470000000000000284e+01	4.060000000000000142e+01	6.600000000000000000e+01	7.420000000000000284e+01	5.160000000000000142e+01	6.990000000000000568e+01	7.140000000000000568e+01	6.929999999999999716e+01	6.500000000000000000e+01	6.450000000000000000e+01	7.300000000000000000e+01	7.140000000000000568e+01	6.729999999999999716e+01	6.770000000000000284e+01	7.209999999999999432e+01	6.509999999999999432e+01	6.750000000000000000e+01	6.500000000000000000e+01	6.770000000000000284e+01	6.500000000000000000e+01	6.670000000000000284e+01	6.250000000000000000e+01	6.600000000000000000e+01	6.940000000000000568e+01	6.490000000000000568e+01	6.740000000000000568e+01	6.859999999999999432e+01	6.509999999999999432e+01	6.370000000000000284e+01	6.500000000000000000e+01	6.829999999999999716e+01	7.409999999999999432e+01	6.740000000000000568e+01	7.000000000000000000e+01	6.859999999999999432e+01	6.529999999999999716e+01	6.479999999999999716e+01	6.800000000000000000e+01	6.929999999999999716e+01	6.859999999999999432e+01	6.629999999999999716e+01	6.640000000000000568e+01
7.190000000000000568e+01	7.329999999999999716e+01	6.300000000000000000e+01	6.850000000000000000e+01	6.709999999999999432e+01	6.929999999999999716e+01	6.809999999999999432e+01	7.040000000000000568e+01	6.500000000000000000e+01	4.179999999999999716e+01	6.540000000000000568e+01	7.329999999999999716e+01	4.750000000000000000e+01	7.040000000000000568e+01	7.259999999999999432e+01	6.920000000000000284e+01	6.500000000000000000e+01	6.400000000000000000e+01	7.050000000000000000e+01	7.200000000000000000e+01	6.529999999999999716e+01	6.840000000000000568e+01	7.259999999999999432e+01	6.520000000000000284e+01	6.620000000000000284e+01	6.509999999999999432e+01	6.870000000000000284e+01	6.500000000000000000e+01	6.690000000000000568e+01	6.260000000000000142e+01	6.500000000000000000e+01	6.600000000000000000e+01	6.479999999999999716e+01	6.920000000000000284e+01	6.770000000000000284e+01	6.490000000000000568e+01	6.129999999999999716e+01	6.500000000000000000e+01	6.970000000000000284e+01	7.109999999999999432e+01	6.650000000000000000e+01	6.800000000000000000e+01	6.820000000000000284e+01	6.509999999999999432e+01	6.490000000000000568e+01	6.720000000000000284e+01	6.659999999999999432e+01	6.859999999999999432e+01	6.820000000000000284e+01	6.640000000000000568e+01
7.020000000000000284e+01	7.329999999999999716e+01	6.229999999999999716e+01	6.620000000000000284e+01	6.559999999999999432e+01	6.970000000000000284e+01	6.970000000000000284e+01	6.990000000000000568e+01	6.409999999999999432e+01	4.020000000000000284e+01	6.820000000000000284e+01	7.309999999999999432e+01	4.579999999999999716e+01	7.050000000000000000e+01	6.979999999999999716e+01	6.840000000000000568e+01	6.500000000000000000e+01	6.129999999999999716e+01	6.920000000000000284e+01	6.970000000000000284e+01	6.370000000000000284e+01	6.709999999999999432e+01	7.209999999999999432e+01	6.520000000000000284e+01	6.540000000000000568e+01	6.509999999999999432e+01	6.900000000000000000e+01	6.509999999999999432e+01	6.440000000000000568e+01	5.889999999999999858e+01	6.459999999999999432e+01	6.850000000000000000e+01	6.479999999999999716e+01	7.109999999999999432e+01	6.840000000000000568e+01	6.500000000000000000e+01	5.950000000000000000e+01	6.500000000000000000e+01	6.820000000000000284e+01	7.140000000000000568e+01	6.800000000000000000e+01	6.720000000000000284e+01	6.900000000000000000e+01	6.500000000000000000e+01	6.479999999999999716e+01	6.670000000000000284e+01	6.790000000000000568e+01	6.890000000000000568e+01	6.920000000000000284e+01	6.659999999999999432e+01
7.200000000000000000e+01	6.700000000000000000e+01	6.470000000000000284e+01	5.789999999999999858e+01	6.779999999999999716e+01	7.179999999999999716e+01	7.209999999999999432e+01	6.790000000000000568e+01	6.389999999999999858e+01	6.470000000000000284e+01	7.229999999999999716e+01	7.100000000000000000e+01	6.490000000000000568e+01	7.170000000000000284e+01	6.089999999999999858e+01	6.709999999999999432e+01	6.500000000000000000e+01	6.520000000000000284e+01	7.129999999999999716e+01	7.109999999999999432e+01	6.609999999999999432e+01	6.929999999999999716e+01	6.979999999999999716e+01	6.500000000000000000e+01	6.809999999999999432e+01	6.500000000000000000e+01	6.879999999999999716e+01	6.500000000000000000e+01	6.900000000000000000e+01	6.409999999999999432e+01	6.829999999999999716e+01	7.029999999999999716e+01	6.500000000000000000e+01	7.009999999999999432e+01	6.750000000000000000e+01	6.500000000000000000e+01	6.670000000000000284e+01	6.500000000000000000e+01	6.840000000000000568e+01	7.059999999999999432e+01	6.859999999999999432e+01	6.929999999999999716e+01	6.879999999999999716e+01	6.500000000000000000e+01	6.500000000000000000e+01	6.929999999999999716e+01	7.050000000000000000e+01	7.020000000000000284e+01	6.820000000000000284e+01	6.820000000000000284e+01
7.259999999999999432e+01	6.829999999999999716e+01	6.200000000000000000e+01	6.400000000000000000e+01	6.250000000000000000e+01	7.320000000000000284e+01	7.190000000000000568e+01	6.900000000000000000e+01	6.370000000000000284e+01	6.959999999999999432e+01	7.129999999999999716e+01	7.190000000000000568e+01	5.379999999999999716e+01	7.100000000000000000e+01	6.570000000000000284e+01	6.700000000000000000e+01	6.500000000000000000e+01	6.700000000000000000e+01	7.190000000000000568e+01	7.159999999999999432e+01	6.579999999999999716e+01	6.850000000000000000e+01	7.100000000000000000e+01	6.500000000000000000e+01	6.779999999999999716e+01	6.500000000000000000e+01	7.000000000000000000e+01	6.500000000000000000e+01	6.679999999999999716e+01	6.289999999999999858e+01	6.720000000000000284e+01	6.990000000000000568e+01	6.500000000000000000e+01	7.279999999999999716e+01	6.909999999999999432e+01	6.490000000000000568e+01	6.370000000000000284e+01	6.500000000000000000e+01	7.009999999999999432e+01	7.270000000000000284e+01	6.720000000000000284e+01	6.950000000000000000e+01	6.779999999999999716e+01	6.500000000000000000e+01	6.550000000000000000e+01	6.820000000000000284e+01	6.929999999999999716e+01	7.150000000000000000e+01	7.000000000000000000e+01	6.779999999999999716e+01
7.179999999999999716e+01	6.890000000000000568e+01	6.409999999999999432e+01	6.800000000000000000e+01	6.609999999999999432e+01	6.750000000000000000e+01	7.150000000000000000e+01	6.979999999999999716e+01	6.360000000000000142e+01	6.129999999999999716e+01	7.040000000000000568e+01	7.350000000000000000e+01	4.910000000000000142e+01	7.279999999999999716e+01	6.779999999999999716e+01	6.759999999999999432e+01	6.500000000000000000e+01	6.479999999999999716e+01	7.259999999999999432e+01	7.179999999999999716e+01	6.339999999999999858e+01	6.770000000000000284e+01	7.100000000000000000e+01	6.479999999999999716e+01	6.950000000000000000e+01	6.490000000000000568e+01	6.940000000000000568e+01	6.500000000000000000e+01	6.700000000000000000e+01	6.110000000000000142e+01	6.470000000000000284e+01	6.990000000000000568e+01	6.490000000000000568e+01	7.240000000000000568e+01	6.879999999999999716e+01	6.500000000000000000e+01	6.029999999999999716e+01	6.500000000000000000e+01	6.929999999999999716e+01	7.290000000000000568e+01	6.640000000000000568e+01	7.050000000000000000e+01	6.870000000000000284e+01	6.500000000000000000e+01	6.509999999999999432e+01	6.800000000000000000e+01	6.720000000000000284e+01	7.009999999999999432e+01	6.909999999999999432e+01	6.900000000000000000e+01
6.929999999999999716e+01	7.109999999999999432e+01	6.440000000000000568e+01	6.339999999999999858e+01	6.640000000000000568e+01	6.959999999999999432e+01	6.890000000000000568e+01	6.940000000000000568e+01	6.400000000000000000e+01	6.029999999999999716e+01	6.779999999999999716e+01	7.300000000000000000e+01	5.510000000000000142e+01	7.309999999999999432e+01	6.459999999999999432e+01	6.790000000000000568e+01	6.500000000000000000e+01	6.440000000000000568e+01	7.340000000000000568e+01	7.179999999999999716e+01	6.659999999999999432e+01	6.959999999999999432e+01	7.040000000000000568e+01	6.500000000000000000e+01	6.959999999999999432e+01	6.500000000000000000e+01	7.029999999999999716e+01	6.500000000000000000e+01	6.920000000000000284e+01	6.089999999999999858e+01	6.389999999999999858e+01	7.220000000000000284e+01	6.490000000000000568e+01	7.059999999999999432e+01	7.109999999999999432e+01	6.490000000000000568e+01	6.229999999999999716e+01	6.490000000000000568e+01	6.970000000000000284e+01	7.459999999999999432e+01	6.959999999999999432e+01	7.079999999999999716e+01	6.809999999999999432e+01	6.490000000000000568e+01	6.529999999999999716e+01	7.000000000000000000e+01	6.950000000000000000e+01	7.009999999999999432e+01	6.940000000000000568e+01	6.800000000000000000e+01
6.800000000000000000e+01	7.120000000000000284e+01	6.039999999999999858e+01	6.479999999999999716e+01	6.389999999999999858e+01	7.009999999999999432e+01	6.900000000000000000e+01	7.009999999999999432e+01	6.279999999999999716e+01	5.939999999999999858e+01	6.659999999999999432e+01	7.009999999999999432e+01	6.039999999999999858e+01	7.150000000000000000e+01	6.600000000000000000e+01	6.700000000000000000e+01	6.490000000000000568e+01	6.450000000000000000e+01	7.059999999999999432e+01	7.129999999999999716e+01	6.709999999999999432e+01	6.909999999999999432e+01	6.970000000000000284e+01	6.509999999999999432e+01	6.779999999999999716e+01	6.500000000000000000e+01	6.900000000000000000e+01	6.509999999999999432e+01	6.879999999999999716e+01	6.229999999999999716e+01	6.579999999999999716e+01	6.920000000000000284e+01	6.540000000000000568e+01	7.150000000000000000e+01	7.009999999999999432e+01	6.490000000000000568e+01	6.279999999999999716e+01	6.529999999999999716e+01	6.859999999999999432e+01	7.170000000000000284e+01	7.209999999999999432e+01	6.909999999999999432e+01	6.779999999999999716e+01	6.490000000000000568e+01	6.520000000000000284e+01	6.900000000000000000e+01	6.940000000000000568e+01	6.979999999999999716e+01	6.890000000000000568e+01	6.809999999999999432e+01
7.029999999999999716e+01	7.340000000000000568e+01	5.779999999999999716e+01	6.459999999999999432e+01	6.279999999999999716e+01	6.959999999999999432e+01	6.570000000000000284e+01	7.009999999999999432e+01	6.189999999999999858e+01	5.089999999999999858e+01	6.400000000000000000e+01	7.120000000000000284e+01	6.279999999999999716e+01	7.059999999999999432e+01	6.520000000000000284e+01	6.650000000000000000e+01	6.490000000000000568e+01	6.320000000000000284e+01	7.109999999999999432e+01	7.090000000000000568e+01	6.370000000000000284e+01	6.870000000000000284e+01	6.920000000000000284e+01	6.500000000000000000e+01	6.659999999999999432e+01	6.500000000000000000e+01	6.940000000000000568e+01	6.500000000000000000e+01	6.850000000000000000e+01	6.300000000000000000e+01	6.900000000000000000e+01	6.670000000000000284e+01	6.520000000000000284e+01	7.020000000000000284e+01	6.450000000000000000e+01	6.500000000000000000e+01	6.500000000000000000e+01	6.529999999999999716e+01	6.929999999999999716e+01	6.850000000000000000e+01	6.820000000000000284e+01	6.859999999999999432e+01	6.850000000000000000e+01	6.490000000000000568e+01	6.550000000000000000e+01	6.900000000000000000e+01	6.659999999999999432e+01	6.979999999999999716e+01	6.900000000000000000e+01	6.800000000000000000e+01
6.870000000000000284e+01	7.390000000000000568e+01	5.720000000000000284e+01	6.590000000000000568e+01	6.120000000000000284e+01	6.220000000000000284e+01	6.160000000000000142e+01	7.140000000000000568e+01	6.260000000000000142e+01	4.710000000000000142e+01	6.379999999999999716e+01	7.309999999999999432e+01	6.409999999999999432e+01	7.120000000000000284e+01	6.790000000000000568e+01	6.759999999999999432e+01	6.490000000000000568e+01	6.039999999999999858e+01	7.170000000000000284e+01	6.820000000000000284e+01	6.370000000000000284e+01	6.770000000000000284e+01	6.909999999999999432e+01	6.490000000000000568e+01	6.790000000000000568e+01	6.479999999999999716e+01	6.970000000000000284e+01	6.509999999999999432e+01	6.640000000000000568e+01	6.200000000000000000e+01	6.640000000000000568e+01	6.879999999999999716e+01	6.590000000000000568e+01	6.940000000000000568e+01	6.629999999999999716e+01	6.490000000000000568e+01	6.400000000000000000e+01	6.490000000000000568e+01	6.520000000000000284e+01	6.950000000000000000e+01	6.729999999999999716e+01	6.920000000000000284e+01	6.859999999999999432e+01	6.490000000000000568e+01	6.270000000000000284e+01	6.809999999999999432e+01	6.759999999999999432e+01	7.050000000000000000e+01	7.009999999999999432e+01	6.770000000000000284e+01
6.740000000000000568e+01	7.040000000000000568e+01	6.210000000000000142e+01	6.550000000000000000e+01	6.500000000000000000e+01	6.470000000000000284e+01	6.189999999999999858e+01	6.840000000000000568e+01	6.329999999999999716e+01	4.429999999999999716e+01	6.600000000000000000e+01	7.150000000000000000e+01	6.470000000000000284e+01	7.079999999999999716e+01	6.559999999999999432e+01	6.790000000000000568e+01	6.490000000000000568e+01	6.189999999999999858e+01	7.270000000000000284e+01	6.879999999999999716e+01	6.890000000000000568e+01	6.670000000000000284e+01	6.879999999999999716e+01	6.479999999999999716e+01	6.770000000000000284e+01	6.479999999999999716e+01	6.790000000000000568e+01	6.500000000000000000e+01	6.659999999999999432e+01	5.850000000000000000e+01	6.529999999999999716e+01	7.090000000000000568e+01	6.529999999999999716e+01	7.040000000000000568e+01	6.970000000000000284e+01	6.490000000000000568e+01	6.210000000000000142e+01	6.490000000000000568e+01	6.350000000000000000e+01	7.079999999999999716e+01	6.260000000000000142e+01	6.970000000000000284e+01	6.809999999999999432e+01	6.490000000000000568e+01	6.360000000000000142e+01	6.750000000000000000e+01	7.229999999999999716e+01	7.050000000000000000e+01	7.050000000000000000e+01	6.740000000000000568e+01
6.940000000000000568e+01	7.120000000000000284e+01	6.150000000000000000e+01	6.450000000000000000e+01	6.459999999999999432e+01	5.289999999999999858e+01	6.459999999999999432e+01	6.909999999999999432e+01	6.360000000000000142e+01	5.170000000000000284e+01	6.420000000000000284e+01	7.120000000000000284e+01	6.490000000000000568e+01	6.940000000000000568e+01	6.420000000000000284e+01	6.709999999999999432e+01	6.490000000000000568e+01	6.429999999999999716e+01	7.240000000000000568e+01	7.050000000000000000e+01	6.600000000000000000e+01	6.470000000000000284e+01	6.800000000000000000e+01	6.479999999999999716e+01	6.859999999999999432e+01	6.479999999999999716e+01	6.890000000000000568e+01	6.490000000000000568e+01	6.590000000000000568e+01	6.000000000000000000e+01	6.370000000000000284e+01	7.090000000000000568e+01	6.509999999999999432e+01	7.009999999999999432e+01	7.040000000000000568e+01	6.490000000000000568e+01	6.279999999999999716e+01	6.490000000000000568e+01	6.720000000000000284e+01	7.440000000000000568e+01	6.540000000000000568e+01	7.020000000000000284e+01	6.800000000000000000e+01	6.490000000000000568e+01	6.559999999999999432e+01	6.579999999999999716e+01	6.940000000000000568e+01	7.050000000000000000e+01	7.129999999999999716e+01	6.790000000000000568e+01
7.059999999999999432e+01	7.309999999999999432e+01	6.329999999999999716e+01	6.620000000000000284e+01	6.650000000000000000e+01	4.829999999999999716e+01	6.339999999999999858e+01	6.850000000000000000e+01	6.459999999999999432e+01	5.729999999999999716e+01	6.089999999999999858e+01	7.329999999999999716e+01	6.529999999999999716e+01	7.090000000000000568e+01	6.650000000000000000e+01	6.759999999999999432e+01	6.490000000000000568e+01	6.310000000000000142e+01	7.129999999999999716e+01	7.079999999999999716e+01	6.750000000000000000e+01	6.700000000000000000e+01	6.800000000000000000e+01	6.500000000000000000e+01	6.700000000000000000e+01	6.479999999999999716e+01	6.929999999999999716e+01	6.520000000000000284e+01	6.700000000000000000e+01	5.829999999999999716e+01	6.210000000000000142e+01	7.040000000000000568e+01	6.490000000000000568e+01	6.970000000000000284e+01	6.829999999999999716e+01	6.490000000000000568e+01	6.060000000000000142e+01	6.490000000000000568e+01	6.829999999999999716e+01	7.240000000000000568e+01	6.859999999999999432e+01	6.840000000000000568e+01	6.800000000000000000e+01	6.490000000000000568e+01	6.479999999999999716e+01	6.559999999999999432e+01	7.070000000000000284e+01	7.040000000000000568e+01	6.870000000000000284e+01	6.629999999999999716e+01
6.670000000000000284e+01	6.929999999999999716e+01	6.479999999999999716e+01	6.420000000000000284e+01	6.709999999999999432e+01	5.710000000000000142e+01	6.609999999999999432e+01	6.640000000000000568e+01	6.310000000000000142e+01	6.210000000000000142e+01	6.310000000000000142e+01	7.070000000000000284e+01	6.529999999999999716e+01	6.970000000000000284e+01	6.459999999999999432e+01	6.600000000000000000e+01	6.490000000000000568e+01	6.310000000000000142e+01	7.020000000000000284e+01	7.000000000000000000e+01	6.450000000000000000e+01	6.890000000000000568e+01	6.620000000000000284e+01	6.490000000000000568e+01	6.679999999999999716e+01	6.479999999999999716e+01	6.900000000000000000e+01	6.509999999999999432e+01	6.809999999999999432e+01	6.189999999999999858e+01	6.429999999999999716e+01	6.950000000000000000e+01	6.509999999999999432e+01	6.940000000000000568e+01	6.700000000000000000e+01	6.529999999999999716e+01	6.300000000000000000e+01	6.490000000000000568e+01	6.859999999999999432e+01	7.009999999999999432e+01	6.870000000000000284e+01	6.729999999999999716e+01	6.779999999999999716e+01	6.490000000000000568e+01	6.509999999999999432e+01	6.679999999999999716e+01	6.790000000000000568e+01	6.890000000000000568e+01	6.629999999999999716e+01	6.609999999999999432e+01
7.179999999999999716e+01	6.859999999999999432e+01	6.150000000000000000e+01	6.550000000000000000e+01	6.550000000000000000e+01	6.110000000000000142e+01	6.389999999999999858e+01	6.809999999999999432e+01	5.900000000000000000e+01	6.550000000000000000e+01	6.260000000000000142e+01	6.829999999999999716e+01	6.559999999999999432e+01	7.090000000000000568e+01	6.650000000000000000e+01	6.320000000000000284e+01	6.479999999999999716e+01	6.179999999999999716e+01	6.579999999999999716e+01	6.859999999999999432e+01	6.070000000000000284e+01	6.879999999999999716e+01	6.779999999999999716e+01	6.490000000000000568e+01	6.170000000000000284e+01	6.479999999999999716e+01	6.759999999999999432e+01	6.500000000000000000e+01	6.900000000000000000e+01	6.250000000000000000e+01	6.509999999999999432e+01	6.629999999999999716e+01	6.509999999999999432e+01	7.059999999999999432e+01	5.839999999999999858e+01	6.509999999999999432e+01	6.400000000000000000e+01	6.490000000000000568e+01	6.759999999999999432e+01	6.500000000000000000e+01	6.600000000000000000e+01	6.310000000000000142e+01	6.720000000000000284e+01	6.490000000000000568e+01	6.420000000000000284e+01	6.500000000000000000e+01	6.360000000000000142e+01	6.959999999999999432e+01	6.520000000000000284e+01	6.709999999999999432e+01
7.229999999999999716e+01	7.279999999999999716e+01	6.339999999999999858e+01	6.570000000000000284e+01	6.570000000000000284e+01	6.300000000000000000e+01	6.150000000000000000e+01	7.079999999999999716e+01	6.479999999999999716e+01	5.920000000000000284e+01	6.210000000000000142e+01	7.529999999999999716e+01	6.529999999999999716e+01	7.109999999999999432e+01	6.570000000000000284e+01	6.879999999999999716e+01	6.470000000000000284e+01	6.189999999999999858e+01	6.940000000000000568e+01	6.829999999999999716e+01	5.910000000000000142e+01	6.579999999999999716e+01	6.890000000000000568e+01	6.490000000000000568e+01	6.559999999999999432e+01	6.479999999999999716e+01	6.959999999999999432e+01	6.500000000000000000e+01	6.570000000000000284e+01	6.239999999999999858e+01	6.490000000000000568e+01	6.279999999999999716e+01	6.500000000000000000e+01	6.890000000000000568e+01	5.960000000000000142e+01	6.490000000000000568e+01	6.360000000000000142e+01	6.490000000000000568e+01	6.659999999999999432e+01	6.620000000000000284e+01	6.740000000000000568e+01	6.650000000000000000e+01	6.720000000000000284e+01	6.490000000000000568e+01	6.289999999999999858e+01	6.559999999999999432e+01	6.160000000000000142e+01	7.059999999999999432e+01	6.779999999999999716e+01	6.820000000000000284e+01
7.120000000000000284e+01	7.479999999999999716e+01	6.389999999999999858e+01	6.470000000000000284e+01	6.590000000000000568e+01	6.150000000000000000e+01	6.050000000000000000e+01	7.100000000000000000e+01	6.459999999999999432e+01	6.429999999999999716e+01	6.859999999999999432e+01	7.720000000000000284e+01	6.509999999999999432e+01	7.150000000000000000e+01	6.509999999999999432e+01	6.870000000000000284e+01	6.470000000000000284e+01	5.989999999999999858e+01	7.109999999999999432e+01	6.759999999999999432e+01	5.920000000000000284e+01	6.559999999999999432e+01	6.970000000000000284e+01	6.509999999999999432e+01	6.690000000000000568e+01	6.479999999999999716e+01	7.020000000000000284e+01	6.500000000000000000e+01	6.750000000000000000e+01	6.279999999999999716e+01	6.620000000000000284e+01	6.479999999999999716e+01	6.500000000000000000e+01	7.179999999999999716e+01	6.210000000000000142e+01	6.529999999999999716e+01	6.550000000000000000e+01	6.470000000000000284e+01	6.640000000000000568e+01	6.559999999999999432e+01	6.650000000000000000e+01	6.820000000000000284e+01	6.890000000000000568e+01	6.500000000000000000e+01	6.220000000000000284e+01	6.579999999999999716e+01	6.010000000000000142e+01	7.070000000000000284e+01	6.850000000000000000e+01	6.729999999999999716e+01
7.050000000000000000e+01	7.270000000000000284e+01	6.529999999999999716e+01	6.509999999999999432e+01	6.800000000000000000e+01	6.590000000000000568e+01	6.709999999999999432e+01	7.079999999999999716e+01	6.450000000000000000e+01	6.600000000000000000e+01	6.950000000000000000e+01	7.490000000000000568e+01	6.470000000000000284e+01	7.109999999999999432e+01	6.690000000000000568e+01	6.900000000000000000e+01	6.470000000000000284e+01	5.950000000000000000e+01	7.190000000000000568e+01	6.909999999999999432e+01	6.220000000000000284e+01	6.820000000000000284e+01	6.840000000000000568e+01	6.509999999999999432e+01	6.820000000000000284e+01	6.479999999999999716e+01	6.890000000000000568e+01	6.490000000000000568e+01	6.829999999999999716e+01	6.150000000000000000e+01	6.300000000000000000e+01	6.570000000000000284e+01	6.500000000000000000e+01	6.909999999999999432e+01	6.320000000000000284e+01	6.529999999999999716e+01	6.389999999999999858e+01	6.470000000000000284e+01	6.800000000000000000e+01	6.670000000000000284e+01	6.590000000000000568e+01	6.850000000000000000e+01	6.829999999999999716e+01	6.500000000000000000e+01	6.039999999999999858e+01	6.550000000000000000e+01	6.239999999999999858e+01	6.940000000000000568e+01	6.809999999999999432e+01	6.659999999999999432e+01
7.070000000000000284e+01	7.229999999999999716e+01	6.270000000000000284e+01	6.360000000000000142e+01	6.629999999999999716e+01	6.829999999999999716e+01	6.459999999999999432e+01	7.040000000000000568e+01	6.450000000000000000e+01	6.509999999999999432e+01	6.370000000000000284e+01	7.440000000000000568e+01	6.459999999999999432e+01	7.170000000000000284e+01	6.409999999999999432e+01	6.879999999999999716e+01	6.470000000000000284e+01	6.329999999999999716e+01	7.170000000000000284e+01	7.009999999999999432e+01	6.029999999999999716e+01	6.659999999999999432e+01	6.820000000000000284e+01	6.509999999999999432e+01	6.840000000000000568e+01	6.479999999999999716e+01	6.950000000000000000e+01	6.490000000000000568e+01	6.579999999999999716e+01	5.989999999999999858e+01	6.289999999999999858e+01	6.609999999999999432e+01	6.490000000000000568e+01	6.929999999999999716e+01	6.339999999999999858e+01	6.490000000000000568e+01	6.540000000000000568e+01	6.470000000000000284e+01	6.790000000000000568e+01	6.709999999999999432e+01	6.800000000000000000e+01	6.879999999999999716e+01	6.879999999999999716e+01	6.500000000000000000e+01	6.490000000000000568e+01	6.570000000000000284e+01	6.129999999999999716e+01	7.000000000000000000e+01	6.790000000000000568e+01	6.629999999999999716e+01
7.100000000000000000e+01	7.140000000000000568e+01	6.060000000000000142e+01	6.520000000000000284e+01	6.429999999999999716e+01	6.329999999999999716e+01	6.060000000000000142e+01	6.770000000000000284e+01	6.490000000000000568e+01	6.350000000000000000e+01	6.050000000000000000e+01	7.340000000000000568e+01	6.490000000000000568e+01	7.200000000000000000e+01	6.540000000000000568e+01	7.079999999999999716e+01	6.470000000000000284e+01	6.139999999999999858e+01	7.140000000000000568e+01	6.850000000000000000e+01	6.079999999999999716e+01	6.929999999999999716e+01	6.629999999999999716e+01	6.509999999999999432e+01	6.759999999999999432e+01	6.479999999999999716e+01	6.870000000000000284e+01	6.490000000000000568e+01	6.800000000000000000e+01	6.220000000000000284e+01	6.490000000000000568e+01	6.609999999999999432e+01	6.479999999999999716e+01	7.059999999999999432e+01	6.320000000000000284e+01	6.470000000000000284e+01	6.640000000000000568e+01	6.470000000000000284e+01	6.809999999999999432e+01	6.609999999999999432e+01	6.950000000000000000e+01	6.829999999999999716e+01	6.500000000000000000e+01	6.500000000000000000e+01	6.379999999999999716e+01	6.440000000000000568e+01	6.279999999999999716e+01	7.029999999999999716e+01	6.679999999999999716e+01	6.820000000000000284e+01
7.250000000000000000e+01	7.029999999999999716e+01	5.929999999999999716e+01	6.509999999999999432e+01	6.220000000000000284e+01	6.409999999999999432e+01	6.200000000000000000e+01	6.670000000000000284e+01	6.429999999999999716e+01	6.700000000000000000e+01	6.310000000000000142e+01	7.000000000000000000e+01	6.490000000000000568e+01	6.979999999999999716e+01	6.540000000000000568e+01	6.890000000000000568e+01	6.470000000000000284e+01	5.910000000000000142e+01	7.309999999999999432e+01	6.820000000000000284e+01	6.189999999999999858e+01	6.940000000000000568e+01	6.840000000000000568e+01	6.509999999999999432e+01	6.920000000000000284e+01	6.479999999999999716e+01	6.779999999999999716e+01	6.479999999999999716e+01	6.840000000000000568e+01	6.250000000000000000e+01	6.670000000000000284e+01	6.750000000000000000e+01	6.479999999999999716e+01	7.109999999999999432e+01	6.379999999999999716e+01	6.470000000000000284e+01	6.829999999999999716e+01	6.470000000000000284e+01	6.729999999999999716e+01	6.959999999999999432e+01	6.659999999999999432e+01	7.020000000000000284e+01	6.659999999999999432e+01	6.479999999999999716e+01	6.409999999999999432e+01	6.609999999999999432e+01	6.370000000000000284e+01	7.070000000000000284e+01	6.790000000000000568e+01	6.840000000000000568e+01
6.959999999999999432e+01	6.970000000000000284e+01	6.110000000000000142e+01	6.120000000000000284e+01	6.379999999999999716e+01	6.640000000000000568e+01	5.970000000000000284e+01	6.629999999999999716e+01	6.370000000000000284e+01	6.520000000000000284e+01	6.210000000000000142e+01	7.150000000000000000e+01	6.490000000000000568e+01	7.050000000000000000e+01	6.310000000000000142e+01	6.900000000000000000e+01	6.470000000000000284e+01	6.110000000000000142e+01	7.220000000000000284e+01	6.729999999999999716e+01	6.450000000000000000e+01	6.700000000000000000e+01	6.759999999999999432e+01	6.509999999999999432e+01	6.750000000000000000e+01	6.479999999999999716e+01	6.900000000000000000e+01	6.479999999999999716e+01	6.559999999999999432e+01	6.270000000000000284e+01	6.670000000000000284e+01	6.970000000000000284e+01	6.490000000000000568e+01	7.059999999999999432e+01	6.720000000000000284e+01	6.470000000000000284e+01	6.409999999999999432e+01	6.459999999999999432e+01	6.720000000000000284e+01	7.129999999999999716e+01	6.529999999999999716e+01	6.900000000000000000e+01	6.829999999999999716e+01	6.470000000000000284e+01	6.339999999999999858e+01	6.700000000000000000e+01	6.759999999999999432e+01	6.929999999999999716e+01	6.809999999999999432e+01	6.809999999999999432e+01
6.859999999999999432e+01	6.770000000000000284e+01	6.070000000000000284e+01	6.379999999999999716e+01	6.300000000000000000e+01	6.479999999999999716e+01	6.409999999999999432e+01	6.559999999999999432e+01	6.350000000000000000e+01	6.490000000000000568e+01	6.370000000000000284e+01	7.040000000000000568e+01	6.509999999999999432e+01	7.120000000000000284e+01	6.429999999999999716e+01	6.659999999999999432e+01	6.470000000000000284e+01	6.429999999999999716e+01	7.159999999999999432e+01	6.979999999999999716e+01	6.520000000000000284e+01	6.670000000000000284e+01	6.759999999999999432e+01	6.509999999999999432e+01	6.859999999999999432e+01	6.479999999999999716e+01	6.820000000000000284e+01	6.490000000000000568e+01	6.600000000000000000e+01	6.150000000000000000e+01	6.659999999999999432e+01	6.820000000000000284e+01	6.490000000000000568e+01	7.070000000000000284e+01	6.550000000000000000e+01	6.479999999999999716e+01	6.079999999999999716e+01	6.459999999999999432e+01	6.770000000000000284e+01	6.950000000000000000e+01	6.670000000000000284e+01	6.909999999999999432e+01	6.709999999999999432e+01	6.609999999999999432e+01	6.540000000000000568e+01	6.640000000000000568e+01	6.850000000000000000e+01	6.870000000000000284e+01	6.650000000000000000e+01	6.820000000000000284e+01
6.900000000000000000e+01	6.840000000000000568e+01	6.250000000000000000e+01	6.479999999999999716e+01	6.559999999999999432e+01	6.620000000000000284e+01	6.160000000000000142e+01	6.800000000000000000e+01	6.420000000000000284e+01	6.779999999999999716e+01	6.160000000000000142e+01	6.979999999999999716e+01	6.509999999999999432e+01	7.129999999999999716e+01	6.559999999999999432e+01	6.579999999999999716e+01	6.470000000000000284e+01	6.440000000000000568e+01	7.259999999999999432e+01	7.029999999999999716e+01	6.759999999999999432e+01	6.720000000000000284e+01	6.879999999999999716e+01	6.509999999999999432e+01	6.859999999999999432e+01	6.479999999999999716e+01	6.990000000000000568e+01	6.479999999999999716e+01	6.590000000000000568e+01	6.070000000000000284e+01	6.540000000000000568e+01	7.029999999999999716e+01	6.490000000000000568e+01	6.979999999999999716e+01	6.759999999999999432e+01	6.479999999999999716e+01	6.029999999999999716e+01	6.459999999999999432e+01	6.720000000000000284e+01	7.070000000000000284e+01	6.740000000000000568e+01	6.979999999999999716e+01	6.729999999999999716e+01	6.550000000000000000e+01	6.550000000000000000e+01	6.720000000000000284e+01	7.140000000000000568e+01	6.940000000000000568e+01	6.750000000000000000e+01	6.729999999999999716e+01
6.829999999999999716e+01	6.620000000000000284e+01	6.540000000000000568e+01	6.320000000000000284e+01	6.750000000000000000e+01	6.409999999999999432e+01	6.039999999999999858e+01	6.429999999999999716e+01	6.389999999999999858e+01	6.279999999999999716e+01	6.000000000000000000e+01	6.840000000000000568e+01	6.500000000000000000e+01	7.079999999999999716e+01	6.310000000000000142e+01	6.490000000000000568e+01	6.509999999999999432e+01	6.650000000000000000e+01	7.229999999999999716e+01	7.009999999999999432e+01	6.959999999999999432e+01	6.870000000000000284e+01	7.109999999999999432e+01	6.509999999999999432e+01	6.790000000000000568e+01	6.479999999999999716e+01	6.850000000000000000e+01	6.479999999999999716e+01	6.800000000000000000e+01	6.039999999999999858e+01	6.339999999999999858e+01	6.809999999999999432e+01	6.490000000000000568e+01	6.940000000000000568e+01	6.659999999999999432e+01	6.479999999999999716e+01	5.689999999999999858e+01	6.459999999999999432e+01	6.679999999999999716e+01	7.040000000000000568e+01	6.809999999999999432e+01	6.879999999999999716e+01	6.820000000000000284e+01	6.550000000000000000e+01	6.520000000000000284e+01	6.650000000000000000e+01	7.150000000000000000e+01	6.929999999999999716e+01	6.609999999999999432e+01	6.709999999999999432e+01
7.000000000000000000e+01	6.790000000000000568e+01	6.010000000000000142e+01	6.350000000000000000e+01	6.360000000000000142e+01	6.629999999999999716e+01	6.520000000000000284e+01	6.829999999999999716e+01	6.239999999999999858e+01	6.509999999999999432e+01	6.120000000000000284e+01	6.879999999999999716e+01	6.490000000000000568e+01	7.059999999999999432e+01	6.450000000000000000e+01	6.459999999999999432e+01	6.509999999999999432e+01	6.429999999999999716e+01	7.079999999999999716e+01	7.079999999999999716e+01	6.420000000000000284e+01	6.990000000000000568e+01	6.840000000000000568e+01	6.509999999999999432e+01	6.609999999999999432e+01	6.479999999999999716e+01	6.920000000000000284e+01	6.479999999999999716e+01	6.929999999999999716e+01	6.079999999999999716e+01	6.590000000000000568e+01	6.700000000000000000e+01	6.490000000000000568e+01	7.170000000000000284e+01	6.389999999999999858e+01	6.479999999999999716e+01	6.339999999999999858e+01	6.459999999999999432e+01	6.809999999999999432e+01	6.779999999999999716e+01	6.820000000000000284e+01	6.620000000000000284e+01	6.900000000000000000e+01	6.550000000000000000e+01	6.509999999999999432e+01	6.670000000000000284e+01	6.590000000000000568e+01	6.909999999999999432e+01	6.670000000000000284e+01	6.720000000000000284e+01
7.070000000000000284e+01	7.000000000000000000e+01	6.029999999999999716e+01	6.279999999999999716e+01	6.350000000000000000e+01	6.490000000000000568e+01	6.360000000000000142e+01	6.859999999999999432e+01	6.350000000000000000e+01	6.360000000000000142e+01	5.989999999999999858e+01	7.459999999999999432e+01	6.490000000000000568e+01	7.209999999999999432e+01	6.220000000000000284e+01	6.790000000000000568e+01	6.520000000000000284e+01	6.389999999999999858e+01	7.079999999999999716e+01	7.000000000000000000e+01	6.189999999999999858e+01	6.609999999999999432e+01	6.850000000000000000e+01	6.540000000000000568e+01	6.750000000000000000e+01	6.550000000000000000e+01	6.890000000000000568e+01	6.479999999999999716e+01	6.590000000000000568e+01	6.160000000000000142e+01	6.790000000000000568e+01	6.509999999999999432e+01	6.540000000000000568e+01	6.950000000000000000e+01	6.170000000000000284e+01	6.479999999999999716e+01	6.270000000000000284e+01	6.459999999999999432e+01	6.629999999999999716e+01	6.690000000000000568e+01	6.389999999999999858e+01	6.750000000000000000e+01	6.800000000000000000e+01	6.550000000000000000e+01	6.429999999999999716e+01	6.600000000000000000e+01	6.289999999999999858e+01	6.950000000000000000e+01	6.740000000000000568e+01	6.659999999999999432e+01
6.550000000000000000e+01	6.870000000000000284e+01	6.139999999999999858e+01	6.490000000000000568e+01	6.450000000000000000e+01	6.690000000000000568e+01	6.289999999999999858e+01	6.870000000000000284e+01	6.250000000000000000e+01	6.920000000000000284e+01	6.310000000000000142e+01	7.109999999999999432e+01	6.479999999999999716e+01	7.070000000000000284e+01	6.509999999999999432e+01	6.579999999999999716e+01	6.490000000000000568e+01	6.250000000000000000e+01	7.100000000000000000e+01	6.620000000000000284e+01	6.250000000000000000e+01	6.300000000000000000e+01	6.970000000000000284e+01	6.540000000000000568e+01	6.829999999999999716e+01	6.550000000000000000e+01	6.920000000000000284e+01	6.479999999999999716e+01	6.339999999999999858e+01	5.870000000000000284e+01	6.229999999999999716e+01	6.479999999999999716e+01	6.540000000000000568e+01	6.920000000000000284e+01	6.250000000000000000e+01	6.520000000000000284e+01	5.850000000000000000e+01	6.459999999999999432e+01	6.750000000000000000e+01	6.779999999999999716e+01	6.550000000000000000e+01	6.829999999999999716e+01	6.870000000000000284e+01	6.550000000000000000e+01	6.300000000000000000e+01	6.550000000000000000e+01	6.360000000000000142e+01	6.970000000000000284e+01	6.829999999999999716e+01	6.709999999999999432e+01
6.859999999999999432e+01	7.120000000000000284e+01	6.239999999999999858e+01	6.829999999999999716e+01	6.640000000000000568e+01	6.479999999999999716e+01	6.479999999999999716e+01	6.909999999999999432e+01	6.110000000000000142e+01	7.020000000000000284e+01	6.509999999999999432e+01	7.279999999999999716e+01	6.479999999999999716e+01	7.079999999999999716e+01	6.870000000000000284e+01	6.609999999999999432e+01	6.490000000000000568e+01	6.360000000000000142e+01	7.220000000000000284e+01	6.740000000000000568e+01	6.400000000000000000e+01	6.729999999999999716e+01	6.890000000000000568e+01	6.540000000000000568e+01	6.859999999999999432e+01	6.550000000000000000e+01	6.859999999999999432e+01	6.529999999999999716e+01	6.679999999999999716e+01	5.729999999999999716e+01	6.160000000000000142e+01	6.740000000000000568e+01	6.540000000000000568e+01	7.050000000000000000e+01	6.500000000000000000e+01	6.520000000000000284e+01	5.650000000000000000e+01	6.459999999999999432e+01	6.459999999999999432e+01	6.859999999999999432e+01	6.620000000000000284e+01	6.850000000000000000e+01	6.690000000000000568e+01	6.559999999999999432e+01	6.520000000000000284e+01	6.620000000000000284e+01	6.559999999999999432e+01	7.040000000000000568e+01	6.809999999999999432e+01	6.679999999999999716e+01
6.850000000000000000e+01	7.200000000000000000e+01	6.400000000000000000e+01	6.859999999999999432e+01	6.729999999999999716e+01	6.220000000000000284e+01	6.000000000000000000e+01	6.990000000000000568e+01	6.170000000000000284e+01	6.959999999999999432e+01	6.470000000000000284e+01	7.220000000000000284e+01	6.490000000000000568e+01	7.109999999999999432e+01	6.950000000000000000e+01	6.529999999999999716e+01	6.490000000000000568e+01	6.339999999999999858e+01	7.259999999999999432e+01	6.859999999999999432e+01	6.310000000000000142e+01	6.640000000000000568e+01	6.879999999999999716e+01	6.540000000000000568e+01	6.820000000000000284e+01	6.550000000000000000e+01	6.840000000000000568e+01	6.529999999999999716e+01	6.620000000000000284e+01	6.039999999999999858e+01	6.479999999999999716e+01	6.670000000000000284e+01	6.540000000000000568e+01	7.020000000000000284e+01	6.270000000000000284e+01	6.520000000000000284e+01	6.170000000000000284e+01	6.459999999999999432e+01	6.629999999999999716e+01	6.670000000000000284e+01	6.679999999999999716e+01	6.870000000000000284e+01	6.570000000000000284e+01	6.559999999999999432e+01	6.450000000000000000e+01	6.740000000000000568e+01	6.379999999999999716e+01	7.090000000000000568e+01	6.729999999999999716e+01	6.729999999999999716e+01
6.959999999999999432e+01	6.920000000000000284e+01	6.579999999999999716e+01	6.479999999999999716e+01	6.809999999999999432e+01	6.310000000000000142e+01	5.960000000000000142e+01	6.800000000000000000e+01	6.250000000000000000e+01	6.370000000000000284e+01	6.300000000000000000e+01	7.229999999999999716e+01	6.490000000000000568e+01	7.070000000000000284e+01	6.620000000000000284e+01	6.570000000000000284e+01	6.479999999999999716e+01	6.370000000000000284e+01	7.220000000000000284e+01	6.840000000000000568e+01	6.540000000000000568e+01	6.790000000000000568e+01	6.870000000000000284e+01	6.529999999999999716e+01	6.890000000000000568e+01	6.550000000000000000e+01	6.900000000000000000e+01	6.529999999999999716e+01	6.720000000000000284e+01	6.250000000000000000e+01	6.450000000000000000e+01	6.859999999999999432e+01	6.540000000000000568e+01	7.029999999999999716e+01	6.579999999999999716e+01	6.520000000000000284e+01	5.939999999999999858e+01	6.459999999999999432e+01	6.700000000000000000e+01	6.779999999999999716e+01	6.829999999999999716e+01	6.920000000000000284e+01	6.570000000000000284e+01	6.559999999999999432e+01	6.450000000000000000e+01	6.779999999999999716e+01	6.640000000000000568e+01	7.040000000000000568e+01	6.909999999999999432e+01	6.690000000000000568e+01
[truncated: 12,356 more rows]
[truncated: 178 more columns]
