# Supplementary material
Source: ML conference proceedings conference paper supplement (https://proceedings.neurips.cc/paper_files/paper/2022/hash/7b102c908e9404dd040599c65db4ce3e-Abstract.html)
Supplement: Supplementary file 1 [file 7b102c908e9404dd040599c65db4ce3e-Supplemental-Conference.zip › 663_multivariate_time_series_forec-Supplementary Material/code/data/PeMS/W_228.csv]

0.000000000000000000e+00	3.165940000000000055e+03	8.731540000000000873e+03	1.190345000000000073e+04	7.757180000000000291e+03	1.987850999999999840e+04	1.843634999999999854e+04	2.213469999999999800e+03	5.887739999999999782e+03	1.613212000000000080e+04	1.361550000000000000e+04	4.269590000000000146e+03	9.099250000000000000e+03	2.542261999999999898e+04	1.352071999999999935e+04	5.371210000000000036e+03	1.601129999999999927e+04	1.577886000000000058e+04	1.806190999999999985e+04	1.763356999999999971e+04	1.546243000000000029e+04	1.516569000000000051e+04	1.941761999999999898e+04	1.523898999999999978e+04	1.867072999999999956e+04	1.856590999999999985e+04	2.018365000000000146e+04	1.739027999999999884e+04	1.519111000000000058e+04	1.543822999999999956e+04	1.561242000000000007e+04	1.589259000000000015e+04	1.562647999999999956e+04	1.735031999999999971e+04	1.613511000000000058e+04	1.522547999999999956e+04	1.507397999999999956e+04	1.669311999999999898e+04	1.809327000000000044e+04	1.669311999999999898e+04	1.737709000000000015e+04	1.856590999999999985e+04	2.642956999999999971e+04	1.763356999999999971e+04	1.623171999999999935e+04	1.601129999999999927e+04	1.562647999999999956e+04	1.867168999999999869e+04	1.883391999999999825e+04	2.444752999999999884e+04
3.165940000000000055e+03	0.000000000000000000e+00	5.625760000000000218e+03	8.749350000000000364e+03	4.695510000000000218e+03	1.671695999999999913e+04	1.527400000000000000e+04	1.037650000000000091e+03	2.910289999999999964e+03	1.296619000000000051e+04	1.045178000000000065e+04	1.330369999999999891e+03	5.982329999999999927e+03	2.225806000000000131e+04	1.035720000000000073e+04	2.391119999999999891e+03	1.350905999999999949e+04	1.316072999999999956e+04	1.495242000000000007e+04	1.529495000000000073e+04	1.233053000000000065e+04	1.233389999999999964e+04	1.634637000000000080e+04	1.231305999999999949e+04	1.557898999999999978e+04	1.547128000000000065e+04	1.713229000000000087e+04	1.503122999999999956e+04	1.233771999999999935e+04	1.230615999999999985e+04	1.245745000000000073e+04	1.272706999999999971e+04	1.247269000000000051e+04	1.422169000000000051e+04	1.297070000000000073e+04	1.213322999999999956e+04	1.203926000000000022e+04	1.354576000000000022e+04	1.579286000000000058e+04	1.354576000000000022e+04	1.502030999999999949e+04	1.547128000000000065e+04	2.344934999999999854e+04	1.529495000000000073e+04	1.375367000000000007e+04	1.350905999999999949e+04	1.247269000000000051e+04	1.558101000000000022e+04	1.574737000000000080e+04	2.145779999999999927e+04
8.731540000000000873e+03	5.625760000000000218e+03	0.000000000000000000e+00	3.280119999999999891e+03	1.035650000000000091e+03	1.146575000000000000e+04	1.002742000000000007e+04	6.659590000000000146e+03	2.905289999999999964e+03	7.631760000000000218e+03	5.065199999999999818e+03	4.470840000000000146e+03	3.874200000000000159e+02	1.691270000000000073e+04	4.968680000000000291e+03	3.392760000000000218e+03	8.920209999999999127e+03	8.335059999999999491e+03	1.018957999999999993e+04	1.095315999999999985e+04	6.737239999999999782e+03	7.082720000000000255e+03	1.176443000000000029e+04	6.879180000000000291e+03	1.090643000000000029e+04	1.078495999999999913e+04	1.262835000000000036e+04	1.066121999999999935e+04	7.042159999999999854e+03	6.713239999999999782e+03	6.946699999999999818e+03	7.351869999999999891e+03	6.954520000000000437e+03	9.346309999999999491e+03	7.717489999999999782e+03	6.507479999999999563e+03	6.447380000000000109e+03	8.526329999999999927e+03	1.150363999999999942e+04	8.526329999999999927e+03	1.065576000000000022e+04	1.078495999999999913e+04	1.910702000000000044e+04	1.095315999999999985e+04	9.202959999999999127e+03	8.920209999999999127e+03	6.954520000000000437e+03	1.091468000000000029e+04	1.109970000000000073e+04	1.711711999999999898e+04
1.190345000000000073e+04	8.749350000000000364e+03	3.280119999999999891e+03	0.000000000000000000e+00	4.315550000000000182e+03	8.193100000000000364e+03	6.759319999999999709e+03	9.761190000000000509e+03	6.171810000000000400e+03	4.355250000000000000e+03	1.790750000000000000e+03	7.688279999999999745e+03	2.892840000000000146e+03	1.363379999999999927e+04	1.694579999999999927e+03	6.641739999999999782e+03	8.214350000000000364e+03	7.388649999999999636e+03	7.128460000000000036e+03	1.032255999999999949e+04	3.641219999999999800e+03	5.592960000000000036e+03	8.765659999999999854e+03	4.980340000000000146e+03	7.878050000000000182e+03	7.751890000000000327e+03	9.652649999999999636e+03	1.002585000000000036e+04	5.462800000000000182e+03	3.616420000000000073e+03	3.708980000000000018e+03	4.071920000000000073e+03	3.723460000000000036e+03	6.243140000000000327e+03	4.460470000000000255e+03	3.683510000000000218e+03	4.004460000000000036e+03	5.363039999999999964e+03	1.088338999999999942e+04	5.363039999999999964e+03	1.002694000000000051e+04	7.751890000000000327e+03	1.611746999999999935e+04	1.032255999999999949e+04	8.509829999999999927e+03	8.214350000000000364e+03	3.723460000000000036e+03	7.889619999999999891e+03	8.080470000000000255e+03	1.415015999999999985e+04
7.757180000000000291e+03	4.695510000000000218e+03	1.035650000000000091e+03	4.315550000000000182e+03	0.000000000000000000e+00	1.250086000000000058e+04	1.106204000000000087e+04	5.733140000000000327e+03	1.889160000000000082e+03	8.667350000000000364e+03	6.100789999999999964e+03	3.487650000000000091e+03	1.423069999999999936e+03	1.794724000000000160e+04	6.004270000000000437e+03	2.391719999999999800e+03	9.351430000000000291e+03	8.847299999999999272e+03	1.118826000000000022e+04	1.132082999999999993e+04	7.740939999999999600e+03	7.766949999999999818e+03	1.274759000000000015e+04	7.659739999999999782e+03	1.189732999999999993e+04	1.177702000000000044e+04	1.360495999999999913e+04	1.103540999999999985e+04	7.748180000000000291e+03	7.717180000000000291e+03	7.973439999999999600e+03	8.387399999999999636e+03	7.980079999999999927e+03	1.035429999999999927e+04	8.751110000000000582e+03	7.468609999999999673e+03	7.344020000000000437e+03	9.545770000000000437e+03	1.185929000000000087e+04	9.545770000000000437e+03	1.102814999999999964e+04	1.177702000000000044e+04	2.007811999999999898e+04	1.132082999999999993e+04	9.623739999999999782e+03	9.351430000000000291e+03	7.980079999999999927e+03	1.190490999999999985e+04	1.208837999999999920e+04	1.808490999999999985e+04
1.987850999999999840e+04	1.671695999999999913e+04	1.146575000000000000e+04	8.193100000000000364e+03	1.250086000000000058e+04	0.000000000000000000e+00	1.445299999999999955e+03	1.767934999999999854e+04	1.432926000000000022e+04	3.839300000000000182e+03	6.402770000000000437e+03	1.577771999999999935e+04	1.107853000000000065e+04	5.563250000000000000e+03	6.499130000000000109e+03	1.477660000000000036e+04	1.190947999999999956e+04	1.099710000000000036e+04	2.954409999999999854e+03	1.342654000000000087e+04	5.411680000000000291e+03	9.231879999999999200e+03	3.473880000000000109e+03	8.286299999999999272e+03	3.110309999999999945e+03	3.075469999999999800e+03	3.988679999999999836e+03	1.321144000000000051e+04	9.023280000000000655e+03	5.426439999999999600e+03	4.778109999999999673e+03	4.138750000000000000e+03	4.797640000000000327e+03	3.033940000000000055e+03	3.761130000000000109e+03	6.246350000000000364e+03	7.118529999999999745e+03	3.308460000000000036e+03	1.384545000000000073e+04	3.308460000000000036e+03	1.322537999999999920e+04	3.075469999999999800e+03	9.053670000000000073e+03	1.342654000000000087e+04	1.211178000000000065e+04	1.190947999999999956e+04	4.797640000000000327e+03	3.134960000000000036e+03	3.189550000000000182e+03	7.376750000000000000e+03
1.843634999999999854e+04	1.527400000000000000e+04	1.002742000000000007e+04	6.759319999999999709e+03	1.106204000000000087e+04	1.445299999999999955e+03	0.000000000000000000e+00	1.623871999999999935e+04	1.288626000000000022e+04	2.414949999999999818e+03	4.968609999999999673e+03	1.433243000000000029e+04	9.640399999999999636e+03	6.994359999999999673e+03	5.064739999999999782e+03	1.333227000000000044e+04	1.103915999999999985e+04	1.010422999999999956e+04	2.365190000000000055e+03	1.269337999999999920e+04	4.174430000000000291e+03	8.242540000000000873e+03	3.549389999999999873e+03	7.272430000000000291e+03	2.863090000000000146e+03	2.774440000000000055e+03	4.298279999999999745e+03	1.245945000000000073e+04	8.030859999999999673e+03	4.185899999999999636e+03	3.453860000000000127e+03	2.728949999999999818e+03	3.481820000000000164e+03	2.021359999999999900e+03	2.316500000000000000e+03	5.076039999999999964e+03	6.006960000000000036e+03	1.984640000000000100e+03	1.314602000000000044e+04	1.984640000000000100e+03	1.247179999999999927e+04	2.774440000000000055e+03	1.007318000000000029e+04	1.269337999999999920e+04	1.126215999999999985e+04	1.103915999999999985e+04	3.481820000000000164e+03	2.889219999999999800e+03	3.022139999999999873e+03	8.273459999999999127e+03
2.213469999999999800e+03	1.037650000000000091e+03	6.659590000000000146e+03	9.761190000000000509e+03	5.733140000000000327e+03	1.767934999999999854e+04	1.623871999999999935e+04	0.000000000000000000e+00	3.937820000000000164e+03	1.394912000000000080e+04	1.144873999999999978e+04	2.329500000000000000e+03	7.013670000000000073e+03	2.322893999999999869e+04	1.135470000000000073e+04	3.416159999999999854e+03	1.447389999999999964e+04	1.414815999999999985e+04	1.584878000000000065e+04	1.622710000000000036e+04	1.335392000000000007e+04	1.335595999999999913e+04	1.721009000000000015e+04	1.334581999999999971e+04	1.645950000000000000e+04	1.635428000000000065e+04	1.798081000000000131e+04	1.596754000000000087e+04	1.336260000000000036e+04	1.332948999999999978e+04	1.346669000000000051e+04	1.371623999999999978e+04	1.348305999999999949e+04	1.513720000000000073e+04	1.394252000000000044e+04	1.316660000000000036e+04	1.307682999999999993e+04	1.448395000000000073e+04	1.671716999999999825e+04	1.448395000000000073e+04	1.595610000000000036e+04	1.635428000000000065e+04	2.425004999999999927e+04	1.622710000000000036e+04	1.471380999999999949e+04	1.447389999999999964e+04	1.348305999999999949e+04	1.646061999999999898e+04	1.662349000000000160e+04	2.226424000000000160e+04
5.887739999999999782e+03	2.910289999999999964e+03	2.905289999999999964e+03	6.171810000000000400e+03	1.889160000000000082e+03	1.432926000000000022e+04	1.288626000000000022e+04	3.937820000000000164e+03	0.000000000000000000e+00	1.050726000000000022e+04	7.944510000000000218e+03	1.628650000000000091e+03	3.288420000000000073e+03	1.980340999999999985e+04	7.848029999999999745e+03	5.230299999999999727e+02	1.069420000000000073e+04	1.029889999999999964e+04	1.288006999999999971e+04	1.255104999999999927e+04	9.630030000000000655e+03	9.424219999999999345e+03	1.439320000000000073e+04	9.410010000000000218e+03	1.356590999999999985e+04	1.344911000000000058e+04	1.523104999999999927e+04	1.227823999999999978e+04	9.427430000000000291e+03	9.606250000000000000e+03	9.851739999999999782e+03	1.023660000000000036e+04	9.859770000000000437e+03	1.207497999999999956e+04	1.057035000000000036e+04	9.348100000000000364e+03	9.187840000000000146e+03	1.130397999999999956e+04	1.306626000000000022e+04	1.130397999999999956e+04	1.226861000000000058e+04	1.344911000000000058e+04	2.167536999999999898e+04	1.255104999999999927e+04	1.094876000000000022e+04	1.069420000000000073e+04	9.859770000000000437e+03	1.357170999999999913e+04	1.375050000000000000e+04	1.967716999999999825e+04
1.613212000000000080e+04	1.296619000000000051e+04	7.631760000000000218e+03	4.355250000000000000e+03	8.667350000000000364e+03	3.839300000000000182e+03	2.414949999999999818e+03	1.394912000000000080e+04	1.050726000000000022e+04	0.000000000000000000e+00	2.566559999999999945e+03	1.198176000000000022e+04	7.244359999999999673e+03	9.305750000000000000e+03	2.663079999999999927e+03	1.096314999999999964e+04	9.436739999999999782e+03	8.486950000000000728e+03	3.482869999999999891e+03	1.129077000000000044e+04	2.186159999999999854e+03	6.511789999999999964e+03	5.122960000000000036e+03	5.538829999999999927e+03	4.239510000000000218e+03	4.113859999999999673e+03	6.001210000000000036e+03	1.102954000000000087e+04	6.303050000000000182e+03	2.186800000000000182e+03	1.304259999999999991e+03	3.486899999999999977e+02	1.356930000000000064e+03	2.599019999999999982e+03	4.281899999999999977e+02	3.158590000000000146e+03	4.147840000000000146e+03	1.672380000000000109e+03	1.179170000000000073e+04	1.672380000000000109e+03	1.103887999999999920e+04	4.113859999999999673e+03	1.222739999999999964e+04	1.129077000000000044e+04	9.690549999999999272e+03	9.436739999999999782e+03	1.356930000000000064e+03	4.259680000000000291e+03	4.446579999999999927e+03	1.033920999999999913e+04
1.361550000000000000e+04	1.045178000000000065e+04	5.065199999999999818e+03	1.790750000000000000e+03	6.100789999999999964e+03	6.402770000000000437e+03	4.968609999999999673e+03	1.144873999999999978e+04	7.944510000000000218e+03	2.566559999999999945e+03	0.000000000000000000e+00	9.434600000000000364e+03	4.677800000000000182e+03	1.186020999999999913e+04	9.654999999999999716e+01	8.405090000000000146e+03	8.534909999999999854e+03	7.625619999999999891e+03	5.475810000000000400e+03	1.058019000000000051e+04	2.329889999999999873e+03	5.656470000000000255e+03	7.140510000000000218e+03	4.822810000000000400e+03	6.241130000000000109e+03	6.112970000000000255e+03	8.035050000000000182e+03	1.029310000000000036e+04	5.479770000000000437e+03	2.306880000000000109e+03	2.086280000000000200e+03	2.292710000000000036e+03	2.117039999999999964e+03	4.568670000000000073e+03	2.674639999999999873e+03	2.802070000000000164e+03	3.519150000000000091e+03	3.648699999999999818e+03	1.112534000000000015e+04	3.648699999999999818e+03	1.029784000000000015e+04	6.112970000000000255e+03	1.445870000000000073e+04	1.058019000000000051e+04	8.819879999999999200e+03	8.534909999999999854e+03	2.117039999999999964e+03	6.255100000000000364e+03	6.448000000000000000e+03	1.251109000000000015e+04
4.269590000000000146e+03	1.330369999999999891e+03	4.470840000000000146e+03	7.688279999999999745e+03	3.487650000000000091e+03	1.577771999999999935e+04	1.433243000000000029e+04	2.329500000000000000e+03	1.628650000000000091e+03	1.198176000000000022e+04	9.434600000000000364e+03	0.000000000000000000e+00	4.844039999999999964e+03	2.128750000000000000e+04	9.338690000000000509e+03	1.106740000000000009e+03	1.217920999999999913e+04	1.183153000000000065e+04	1.417364999999999964e+04	1.397264999999999964e+04	1.120782999999999993e+04	1.102850000000000000e+04	1.563109000000000015e+04	1.103382999999999993e+04	1.483172999999999956e+04	1.471917000000000007e+04	1.644484000000000015e+04	1.370759000000000015e+04	1.103720000000000073e+04	1.118379000000000087e+04	1.139076000000000022e+04	1.172503000000000065e+04	1.140189999999999964e+04	1.340326000000000022e+04	1.201759000000000015e+04	1.095617000000000007e+04	1.081339999999999964e+04	1.267686000000000058e+04	1.447332999999999993e+04	1.267686000000000058e+04	1.369684000000000015e+04	1.471917000000000007e+04	2.283656000000000131e+04	1.397264999999999964e+04	1.242440999999999985e+04	1.217920999999999913e+04	1.140189999999999964e+04	1.483564999999999964e+04	1.500869000000000051e+04	2.083881000000000131e+04
9.099250000000000000e+03	5.982329999999999927e+03	3.874200000000000159e+02	2.892840000000000146e+03	1.423069999999999936e+03	1.107853000000000065e+04	9.640399999999999636e+03	7.013670000000000073e+03	3.288420000000000073e+03	7.244359999999999673e+03	4.677800000000000182e+03	4.844039999999999964e+03	0.000000000000000000e+00	1.652577999999999884e+04	4.581279999999999745e+03	3.771869999999999891e+03	8.785620000000000800e+03	8.169689999999999600e+03	9.817719999999999345e+03	1.083861000000000058e+04	6.364640000000000327e+03	6.850130000000000109e+03	1.139873999999999978e+04	6.605829999999999927e+03	1.053769000000000051e+04	1.041575000000000000e+04	1.226520000000000073e+04	1.054475000000000000e+04	6.800420000000000073e+03	6.340539999999999964e+03	6.563460000000000036e+03	6.964510000000000218e+03	6.571819999999999709e+03	8.970639999999999418e+03	7.330920000000000073e+03	6.154510000000000218e+03	6.123720000000000255e+03	8.145859999999999673e+03	1.139270000000000073e+04	8.145859999999999673e+03	1.054000000000000000e+04	1.041575000000000000e+04	1.874518999999999869e+04	1.083861000000000058e+04	9.071709999999999127e+03	8.785620000000000800e+03	6.571819999999999709e+03	1.054621999999999935e+04	1.073184000000000015e+04	1.675684000000000015e+04
2.542261999999999898e+04	2.225806000000000131e+04	1.691270000000000073e+04	1.363379999999999927e+04	1.794724000000000160e+04	5.563250000000000000e+03	6.994359999999999673e+03	2.322893999999999869e+04	1.980340999999999985e+04	9.305750000000000000e+03	1.186020999999999913e+04	2.128750000000000000e+04	1.652577999999999884e+04	0.000000000000000000e+00	1.195656999999999971e+04	2.026518000000000029e+04	1.551164999999999964e+04	1.472876000000000022e+04	7.975300000000000182e+03	1.649915000000000146e+04	1.043968000000000029e+04	1.336873999999999978e+04	7.410340000000000146e+03	1.256419000000000051e+04	7.690810000000000400e+03	7.737539999999999964e+03	7.209510000000000218e+03	1.635838999999999942e+04	1.318462000000000080e+04	1.045994000000000051e+04	1.001645000000000073e+04	9.567510000000000218e+03	1.001896999999999935e+04	8.400399999999999636e+03	9.287510000000000218e+03	1.106897999999999956e+04	1.173618000000000029e+04	8.846250000000000000e+03	1.678190999999999985e+04	8.846250000000000000e+03	1.637655999999999949e+04	7.737539999999999964e+03	7.645270000000000437e+03	1.649915000000000146e+04	1.563713999999999942e+04	1.551164999999999964e+04	1.001896999999999935e+04	7.704680000000000291e+03	7.631430000000000291e+03	7.110659999999999854e+03
1.352071999999999935e+04	1.035720000000000073e+04	4.968680000000000291e+03	1.694579999999999927e+03	6.004270000000000437e+03	6.499130000000000109e+03	5.064739999999999782e+03	1.135470000000000073e+04	7.848029999999999745e+03	2.663079999999999927e+03	9.654999999999999716e+01	9.338690000000000509e+03	4.581279999999999745e+03	1.195656999999999971e+04	0.000000000000000000e+00	8.308780000000000655e+03	8.516489999999999782e+03	7.610500000000000000e+03	5.558810000000000400e+03	1.056696999999999935e+04	2.391329999999999927e+03	5.646880000000000109e+03	7.221989999999999782e+03	4.822840000000000146e+03	6.323199999999999818e+03	6.195140000000000327e+03	8.116220000000000255e+03	1.027914999999999964e+04	5.472229999999999563e+03	2.368039999999999964e+03	2.171230000000000018e+03	2.389059999999999945e+03	2.200780000000000200e+03	4.653029999999999745e+03	2.769639999999999873e+03	2.835679999999999836e+03	3.532199999999999818e+03	3.736119999999999891e+03	1.111334000000000015e+04	3.736119999999999891e+03	1.028370000000000073e+04	6.195140000000000327e+03	1.454370999999999913e+04	1.056696999999999935e+04	8.802319999999999709e+03	8.516489999999999782e+03	2.200780000000000200e+03	6.336979999999999563e+03	6.529800000000000182e+03	1.259454000000000087e+04
5.371210000000000036e+03	2.391119999999999891e+03	3.392760000000000218e+03	6.641739999999999782e+03	2.391719999999999800e+03	1.477660000000000036e+04	1.333227000000000044e+04	3.416159999999999854e+03	5.230299999999999727e+02	1.096314999999999964e+04	8.405090000000000146e+03	1.106740000000000009e+03	3.771869999999999891e+03	2.026518000000000029e+04	8.308780000000000655e+03	0.000000000000000000e+00	1.117793000000000029e+04	1.079712000000000080e+04	1.326950000000000000e+04	1.301570000000000073e+04	1.012711000000000058e+04	9.942840000000000146e+03	1.476337999999999920e+04	9.932819999999999709e+03	1.394567000000000007e+04	1.383034000000000015e+04	1.559305999999999949e+04	1.274520999999999913e+04	9.947409999999999854e+03	1.010321999999999935e+04	1.033287000000000080e+04	1.069779000000000087e+04	1.034214999999999964e+04	1.247662000000000080e+04	1.101576000000000022e+04	9.858489999999999782e+03	9.707260000000000218e+03	1.172169000000000051e+04	1.352654999999999927e+04	1.172169000000000051e+04	1.273522999999999956e+04	1.383034000000000015e+04	2.202141999999999825e+04	1.301570000000000073e+04	1.142968000000000029e+04	1.117793000000000029e+04	1.034214999999999964e+04	1.395079999999999927e+04	1.412761000000000058e+04	2.002270999999999913e+04
1.601129999999999927e+04	1.350905999999999949e+04	8.920209999999999127e+03	8.214350000000000364e+03	9.351430000000000291e+03	1.190947999999999956e+04	1.103915999999999985e+04	1.447389999999999964e+04	1.069420000000000073e+04	9.436739999999999782e+03	8.534909999999999854e+03	1.217920999999999913e+04	8.785620000000000800e+03	1.551164999999999964e+04	8.516489999999999782e+03	1.117793000000000029e+04	0.000000000000000000e+00	9.498300000000000409e+02	1.287261000000000058e+04	2.112460000000000036e+03	7.257130000000000109e+03	2.944750000000000000e+03	1.443651000000000022e+04	3.902190000000000055e+03	1.359688999999999942e+04	1.347731999999999971e+04	1.526845999999999913e+04	1.814529999999999973e+03	3.147139999999999873e+03	7.258869999999999891e+03	8.147010000000000218e+03	9.125110000000000582e+03	8.089859999999999673e+03	1.202338999999999942e+04	9.844829999999999927e+03	6.292399999999999636e+03	5.310010000000000218e+03	1.110898999999999978e+04	2.675150000000000091e+03	1.110898999999999978e+04	1.814619999999999891e+03	1.347731999999999971e+04	2.096040999999999985e+04	2.112460000000000036e+03	2.961800000000000068e+02	0.000000000000000000e+00	8.089859999999999673e+03	1.361948999999999978e+04	1.379615999999999985e+04	1.926308000000000175e+04
1.577886000000000058e+04	1.316072999999999956e+04	8.335059999999999491e+03	7.388649999999999636e+03	8.847299999999999272e+03	1.099710000000000036e+04	1.010422999999999956e+04	1.414815999999999985e+04	1.029889999999999964e+04	8.486950000000000728e+03	7.625619999999999891e+03	1.183153000000000065e+04	8.169689999999999600e+03	1.472876000000000022e+04	7.610500000000000000e+03	1.079712000000000080e+04	9.498300000000000409e+02	0.000000000000000000e+00	1.192377000000000044e+04	2.960940000000000055e+03	6.307739999999999782e+03	2.002500000000000000e+03	1.349061000000000058e+04	2.953570000000000164e+03	1.264918000000000029e+04	1.252937999999999920e+04	1.432479999999999927e+04	2.670300000000000182e+03	2.202030000000000200e+03	6.309590000000000146e+03	7.197659999999999854e+03	8.175609999999999673e+03	7.140409999999999854e+03	1.107369000000000051e+04	8.895239999999999782e+03	5.343789999999999964e+03	4.362770000000000437e+03	1.015920999999999913e+04	3.514159999999999854e+03	1.015920999999999913e+04	2.674280000000000200e+03	1.252937999999999920e+04	2.005054999999999927e+04	2.960940000000000055e+03	1.211349999999999909e+03	9.498300000000000409e+02	7.140409999999999854e+03	1.267170999999999913e+04	1.284876000000000022e+04	1.833993999999999869e+04
1.806190999999999985e+04	1.495242000000000007e+04	1.018957999999999993e+04	7.128460000000000036e+03	1.118826000000000022e+04	2.954409999999999854e+03	2.365190000000000055e+03	1.584878000000000065e+04	1.288006999999999971e+04	3.482869999999999891e+03	5.475810000000000400e+03	1.417364999999999964e+04	9.817719999999999345e+03	7.975300000000000182e+03	5.558810000000000400e+03	1.326950000000000000e+04	1.287261000000000058e+04	1.192377000000000044e+04	0.000000000000000000e+00	1.466154999999999927e+04	5.658649999999999636e+03	9.969559999999999491e+03	1.674710000000000036e+03	8.991899999999999636e+03	7.726499999999999773e+02	6.439700000000000273e+02	2.569630000000000109e+03	1.441060000000000036e+04	9.759129999999999200e+03	5.661090000000000146e+03	4.785770000000000437e+03	3.820510000000000218e+03	4.836710000000000036e+03	9.176599999999999682e+02	3.115420000000000073e+03	6.630560000000000400e+03	7.617829999999999927e+03	1.877579999999999927e+03	1.514337000000000080e+04	1.877579999999999927e+03	1.442117000000000007e+04	6.439700000000000273e+02	8.991870000000000800e+03	1.466154999999999927e+04	1.311788999999999942e+04	1.287261000000000058e+04	4.836710000000000036e+03	7.896000000000000227e+02	9.820199999999999818e+02	7.035949999999999818e+03
1.763356999999999971e+04	1.529495000000000073e+04	1.095315999999999985e+04	1.032255999999999949e+04	1.132082999999999993e+04	1.342654000000000087e+04	1.269337999999999920e+04	1.622710000000000036e+04	1.255104999999999927e+04	1.129077000000000044e+04	1.058019000000000051e+04	1.397264999999999964e+04	1.083861000000000058e+04	1.649915000000000146e+04	1.056696999999999935e+04	1.301570000000000073e+04	2.112460000000000036e+03	2.960940000000000055e+03	1.466154999999999927e+04	0.000000000000000000e+00	9.141840000000000146e+03	4.930649999999999636e+03	1.617213999999999942e+04	5.834109999999999673e+03	1.536157999999999993e+04	1.524625000000000000e+04	1.697559999999999854e+04	2.982699999999999818e+02	5.117479999999999563e+03	9.146459999999999127e+03	1.002762999999999920e+04	1.099597999999999956e+04	9.967959999999999127e+03	1.384394000000000051e+04	1.170935000000000036e+04	8.199440000000000509e+03	7.241039999999999964e+03	1.295801000000000022e+04	5.629199999999999591e+02	1.295801000000000022e+04	3.001299999999999955e+02	1.524625000000000000e+04	2.241988999999999942e+04	0.000000000000000000e+00	1.816279999999999973e+03	2.112460000000000036e+03	9.967959999999999127e+03	1.538519000000000051e+04	1.555502000000000044e+04	2.080268999999999869e+04
1.546243000000000029e+04	1.233053000000000065e+04	6.737239999999999782e+03	3.641219999999999800e+03	7.740939999999999600e+03	5.411680000000000291e+03	4.174430000000000291e+03	1.335392000000000007e+04	9.630030000000000655e+03	2.186159999999999854e+03	2.329889999999999873e+03	1.120782999999999993e+04	6.364640000000000327e+03	1.043968000000000029e+04	2.391329999999999927e+03	1.012711000000000058e+04	7.257130000000000109e+03	6.307739999999999782e+03	5.658649999999999636e+03	9.141840000000000146e+03	0.000000000000000000e+00	4.326600000000000364e+03	7.277079999999999927e+03	3.355940000000000055e+03	6.406020000000000437e+03	6.282130000000000109e+03	8.142739999999999782e+03	8.875239999999999782e+03	4.118409999999999854e+03	2.482000000000000028e+01	8.899800000000000182e+02	1.868210000000000036e+03	8.328200000000000500e+02	4.784119999999999891e+03	2.588369999999999891e+03	9.727500000000000000e+02	1.961809999999999945e+03	3.855349999999999909e+03	9.652899999999999636e+03	3.855349999999999909e+03	8.883870000000000800e+03	6.282130000000000109e+03	1.423013999999999942e+04	9.141840000000000146e+03	7.514289999999999964e+03	7.257130000000000109e+03	8.328200000000000500e+02	6.427100000000000364e+03	6.610989999999999782e+03	1.239009000000000015e+04
1.516569000000000051e+04	1.233389999999999964e+04	7.082720000000000255e+03	5.592960000000000036e+03	7.766949999999999818e+03	9.231879999999999200e+03	8.242540000000000873e+03	1.335595999999999913e+04	9.424219999999999345e+03	6.511789999999999964e+03	5.656470000000000255e+03	1.102850000000000000e+04	6.850130000000000109e+03	1.336873999999999978e+04	5.646880000000000109e+03	9.942840000000000146e+03	2.944750000000000000e+03	2.002500000000000000e+03	9.969559999999999491e+03	4.930649999999999636e+03	4.326600000000000364e+03	0.000000000000000000e+00	1.155960000000000036e+04	9.790900000000000318e+02	1.070520999999999913e+04	1.058356999999999971e+04	1.240701000000000022e+04	4.647449999999999818e+03	2.120300000000000011e+02	4.327090000000000146e+03	5.214909999999999854e+03	6.194050000000000182e+03	5.158960000000000036e+03	9.106680000000000291e+03	6.914460000000000036e+03	3.356750000000000000e+03	2.369840000000000146e+03	8.181960000000000036e+03	5.471369999999999891e+03	8.181960000000000036e+03	4.653250000000000000e+03	1.058356999999999971e+04	1.826918999999999869e+04	4.930649999999999636e+03	3.213639999999999873e+03	2.944750000000000000e+03	5.158960000000000036e+03	1.072717000000000007e+04	1.090725000000000000e+04	1.651127999999999884e+04
1.941761999999999898e+04	1.634637000000000080e+04	1.176443000000000029e+04	8.765659999999999854e+03	1.274759000000000015e+04	3.473880000000000109e+03	3.549389999999999873e+03	1.721009000000000015e+04	1.439320000000000073e+04	5.122960000000000036e+03	7.140510000000000218e+03	1.563109000000000015e+04	1.139873999999999978e+04	7.410340000000000146e+03	7.221989999999999782e+03	1.476337999999999920e+04	1.443651000000000022e+04	1.349061000000000058e+04	1.674710000000000036e+03	1.617213999999999942e+04	7.277079999999999927e+03	1.155960000000000036e+04	0.000000000000000000e+00	1.058052000000000044e+04	9.024099999999999682e+02	1.031180000000000064e+03	8.955299999999999727e+02	1.592903000000000065e+04	1.134814999999999964e+04	7.281159999999999854e+03	6.417920000000000073e+03	5.466109999999999673e+03	6.466199999999999818e+03	2.592309999999999945e+03	4.772319999999999709e+03	8.244430000000000291e+03	9.226399999999999636e+03	3.550469999999999800e+03	1.663963999999999942e+04	3.550469999999999800e+03	1.594045000000000073e+04	1.031180000000000064e+03	7.357069999999999709e+03	1.617213999999999942e+04	1.467418000000000029e+04	1.443651000000000022e+04	6.466199999999999818e+03	8.868300000000000409e+02	6.936699999999999591e+02	5.384500000000000000e+03
1.523898999999999978e+04	1.231305999999999949e+04	6.879180000000000291e+03	4.980340000000000146e+03	7.659739999999999782e+03	8.286299999999999272e+03	7.272430000000000291e+03	1.334581999999999971e+04	9.410010000000000218e+03	5.538829999999999927e+03	4.822810000000000400e+03	1.103382999999999993e+04	6.605829999999999927e+03	1.256419000000000051e+04	4.822840000000000146e+03	9.932819999999999709e+03	3.902190000000000055e+03	2.953570000000000164e+03	8.991899999999999636e+03	5.834109999999999673e+03	3.355940000000000055e+03	9.790900000000000318e+02	1.058052000000000044e+04	0.000000000000000000e+00	9.726559999999999491e+03	9.605049999999999272e+03	1.142818000000000029e+04	5.558210000000000036e+03	7.677300000000000182e+02	3.357280000000000200e+03	4.245520000000000437e+03	5.224149999999999636e+03	4.188760000000000218e+03	8.131470000000000255e+03	5.944260000000000218e+03	2.390250000000000000e+03	1.411759999999999991e+03	7.210210000000000036e+03	6.362619999999999891e+03	7.210210000000000036e+03	5.565430000000000291e+03	9.605049999999999272e+03	1.731202000000000044e+04	5.834109999999999673e+03	4.162699999999999818e+03	3.902190000000000055e+03	4.188760000000000218e+03	9.748559999999999491e+03	9.928459999999999127e+03	1.554406999999999971e+04
1.867072999999999956e+04	1.557898999999999978e+04	1.090643000000000029e+04	7.878050000000000182e+03	1.189732999999999993e+04	3.110309999999999945e+03	2.863090000000000146e+03	1.645950000000000000e+04	1.356590999999999985e+04	4.239510000000000218e+03	6.241130000000000109e+03	1.483172999999999956e+04	1.053769000000000051e+04	7.690810000000000400e+03	6.323199999999999818e+03	1.394567000000000007e+04	1.359688999999999942e+04	1.264918000000000029e+04	7.726499999999999773e+02	1.536157999999999993e+04	6.406020000000000437e+03	1.070520999999999913e+04	9.024099999999999682e+02	9.726559999999999491e+03	0.000000000000000000e+00	1.287700000000000102e+02	1.797779999999999973e+03	1.511420000000000073e+04	1.049423999999999978e+04	6.409260000000000218e+03	5.539340000000000146e+03	4.580149999999999636e+03	5.589000000000000000e+03	1.690289999999999964e+03	3.880300000000000182e+03	7.376229999999999563e+03	8.361389999999999418e+03	2.649760000000000218e+03	1.583688999999999942e+04	2.649760000000000218e+03	1.512517000000000007e+04	1.287700000000000102e+02	8.239540000000000873e+03	1.536157999999999993e+04	1.383870999999999913e+04	1.359688999999999942e+04	5.589000000000000000e+03	2.632000000000000028e+01	2.094399999999999977e+02	6.275520000000000437e+03
1.856590999999999985e+04	1.547128000000000065e+04	1.078495999999999913e+04	7.751890000000000327e+03	1.177702000000000044e+04	3.075469999999999800e+03	2.774440000000000055e+03	1.635428000000000065e+04	1.344911000000000058e+04	4.113859999999999673e+03	6.112970000000000255e+03	1.471917000000000007e+04	1.041575000000000000e+04	7.737539999999999964e+03	6.195140000000000327e+03	1.383034000000000015e+04	1.347731999999999971e+04	1.252937999999999920e+04	6.439700000000000273e+02	1.524625000000000000e+04	6.282130000000000109e+03	1.058356999999999971e+04	1.031180000000000064e+03	9.605049999999999272e+03	1.287700000000000102e+02	0.000000000000000000e+00	1.926529999999999973e+03	1.499825000000000000e+04	1.037268000000000029e+04	6.285239999999999782e+03	5.414329999999999927e+03	4.454029999999999745e+03	5.464210000000000036e+03	1.561579999999999927e+03	3.753230000000000018e+03	7.252699999999999818e+03	8.238280000000000655e+03	2.521250000000000000e+03	1.572269000000000051e+04	2.521250000000000000e+03	1.500914999999999964e+04	0.000000000000000000e+00	8.365590000000000146e+03	1.524625000000000000e+04	1.371975000000000000e+04	1.347731999999999971e+04	5.464210000000000036e+03	1.462800000000000011e+02	3.380600000000000023e+02	6.402760000000000218e+03
2.018365000000000146e+04	1.713229000000000087e+04	1.262835000000000036e+04	9.652649999999999636e+03	1.360495999999999913e+04	3.988679999999999836e+03	4.298279999999999745e+03	1.798081000000000131e+04	1.523104999999999927e+04	6.001210000000000036e+03	8.035050000000000182e+03	1.644484000000000015e+04	1.226520000000000073e+04	7.209510000000000218e+03	8.116220000000000255e+03	1.559305999999999949e+04	1.526845999999999913e+04	1.432479999999999927e+04	2.569630000000000109e+03	1.697559999999999854e+04	8.142739999999999782e+03	1.240701000000000022e+04	8.955299999999999727e+02	1.142818000000000029e+04	1.797779999999999973e+03	1.926529999999999973e+03	0.000000000000000000e+00	1.673668999999999869e+04	1.219523999999999978e+04	8.147550000000000182e+03	7.290829999999999927e+03	6.346060000000000400e+03	7.337890000000000327e+03	3.487000000000000000e+03	5.657789999999999964e+03	9.106729999999999563e+03	1.008507999999999993e+04	4.443739999999999782e+03	1.743541999999999825e+04	4.443739999999999782e+03	1.674852000000000044e+04	1.926529999999999973e+03	6.481100000000000364e+03	1.697559999999999854e+04	1.550209000000000015e+04	1.526845999999999913e+04	7.337890000000000327e+03	1.782369999999999891e+03	1.589200000000000045e+03	4.500250000000000000e+03
1.739027999999999884e+04	1.503122999999999956e+04	1.066121999999999935e+04	1.002585000000000036e+04	1.103540999999999985e+04	1.321144000000000051e+04	1.245945000000000073e+04	1.596754000000000087e+04	1.227823999999999978e+04	1.102954000000000087e+04	1.029310000000000036e+04	1.370759000000000015e+04	1.054475000000000000e+04	1.635838999999999942e+04	1.027914999999999964e+04	1.274520999999999913e+04	1.814529999999999973e+03	2.670300000000000182e+03	1.441060000000000036e+04	2.982699999999999818e+02	8.875239999999999782e+03	4.647449999999999818e+03	1.592903000000000065e+04	5.558210000000000036e+03	1.511420000000000073e+04	1.499825000000000000e+04	1.673668999999999869e+04	0.000000000000000000e+00	4.836220000000000255e+03	8.879500000000000000e+03	9.762170000000000073e+03	1.073237000000000080e+04	9.702790000000000873e+03	1.358837999999999920e+04	1.144695000000000073e+04	7.929270000000000437e+03	6.967029999999999745e+03	1.269825000000000000e+04	8.611699999999999591e+02	1.269825000000000000e+04	2.112000000000000099e+01	1.499825000000000000e+04	2.221702000000000044e+04	2.982699999999999818e+02	1.518359999999999900e+03	1.814529999999999973e+03	9.702790000000000873e+03	1.513768000000000029e+04	1.530851000000000022e+04	2.058818999999999869e+04
1.519111000000000058e+04	1.233771999999999935e+04	7.042159999999999854e+03	5.462800000000000182e+03	7.748180000000000291e+03	9.023280000000000655e+03	8.030859999999999673e+03	1.336260000000000036e+04	9.427430000000000291e+03	6.303050000000000182e+03	5.479770000000000437e+03	1.103720000000000073e+04	6.800420000000000073e+03	1.318462000000000080e+04	5.472229999999999563e+03	9.947409999999999854e+03	3.147139999999999873e+03	2.202030000000000200e+03	9.759129999999999200e+03	5.117479999999999563e+03	4.118409999999999854e+03	2.120300000000000011e+02	1.134814999999999964e+04	7.677300000000000182e+02	1.049423999999999978e+04	1.037268000000000029e+04	1.219523999999999978e+04	4.836220000000000255e+03	0.000000000000000000e+00	4.119140000000000327e+03	5.007170000000000073e+03	5.986229999999999563e+03	4.950979999999999563e+03	8.897239999999999782e+03	6.706590000000000146e+03	3.149480000000000018e+03	2.163920000000000073e+03	7.973649999999999636e+03	5.655039999999999964e+03	7.973649999999999636e+03	4.842439999999999600e+03	1.037268000000000029e+04	1.805913999999999942e+04	5.117479999999999563e+03	3.413340000000000146e+03	3.147139999999999873e+03	4.950979999999999563e+03	1.051621999999999935e+04	1.069617000000000007e+04	1.629995000000000073e+04
1.543822999999999956e+04	1.230615999999999985e+04	6.713239999999999782e+03	3.616420000000000073e+03	7.717180000000000291e+03	5.426439999999999600e+03	4.185899999999999636e+03	1.332948999999999978e+04	9.606250000000000000e+03	2.186800000000000182e+03	2.306880000000000109e+03	1.118379000000000087e+04	6.340539999999999964e+03	1.045994000000000051e+04	2.368039999999999964e+03	1.010321999999999935e+04	7.258869999999999891e+03	6.309590000000000146e+03	5.661090000000000146e+03	9.146459999999999127e+03	2.482000000000000028e+01	4.327090000000000146e+03	7.281159999999999854e+03	3.357280000000000200e+03	6.409260000000000218e+03	6.285239999999999782e+03	8.147550000000000182e+03	8.879500000000000000e+03	4.119140000000000327e+03	0.000000000000000000e+00	8.882400000000000091e+02	1.867109999999999900e+03	8.318700000000000045e+02	4.785250000000000000e+03	2.587449999999999818e+03	9.717999999999999545e+02	1.961069999999999936e+03	3.855039999999999964e+03	9.658129999999999200e+03	3.855039999999999964e+03	8.888069999999999709e+03	6.285239999999999782e+03	1.423984000000000015e+04	9.146459999999999127e+03	7.516520000000000437e+03	7.258869999999999891e+03	8.318700000000000045e+02	6.430279999999999745e+03	6.614390000000000327e+03	1.239843000000000029e+04
1.561242000000000007e+04	1.245745000000000073e+04	6.946699999999999818e+03	3.708980000000000018e+03	7.973439999999999600e+03	4.778109999999999673e+03	3.453860000000000127e+03	1.346669000000000051e+04	9.851739999999999782e+03	1.304259999999999991e+03	2.086280000000000200e+03	1.139076000000000022e+04	6.563460000000000036e+03	1.001645000000000073e+04	2.171230000000000018e+03	1.033287000000000080e+04	8.147010000000000218e+03	7.197659999999999854e+03	4.785770000000000437e+03	1.002762999999999920e+04	8.899800000000000182e+02	5.214909999999999854e+03	6.417920000000000073e+03	4.245520000000000437e+03	5.539340000000000146e+03	5.414329999999999927e+03	7.290829999999999927e+03	9.762170000000000073e+03	5.007170000000000073e+03	8.882400000000000091e+02	0.000000000000000000e+00	9.791599999999999682e+02	6.303999999999999915e+01	3.902929999999999836e+03	1.699599999999999909e+03	1.858480000000000018e+03	2.847360000000000127e+03	2.968070000000000164e+03	1.053632999999999993e+04	2.968070000000000164e+03	9.770950000000000728e+03	5.414329999999999927e+03	1.344902000000000044e+04	1.002762999999999920e+04	8.404260000000000218e+03	8.147010000000000218e+03	6.303999999999999915e+01	5.559869999999999891e+03	5.745649999999999636e+03	1.158537000000000080e+04
1.589259000000000015e+04	1.272706999999999971e+04	7.351869999999999891e+03	4.071920000000000073e+03	8.387399999999999636e+03	4.138750000000000000e+03	2.728949999999999818e+03	1.371623999999999978e+04	1.023660000000000036e+04	3.486899999999999977e+02	2.292710000000000036e+03	1.172503000000000065e+04	6.964510000000000218e+03	9.567510000000000218e+03	2.389059999999999945e+03	1.069779000000000087e+04	9.125110000000000582e+03	8.175609999999999673e+03	3.820510000000000218e+03	1.099597999999999956e+04	1.868210000000000036e+03	6.194050000000000182e+03	5.466109999999999673e+03	5.224149999999999636e+03	4.580149999999999636e+03	4.454029999999999745e+03	6.346060000000000400e+03	1.073237000000000080e+04	5.986229999999999563e+03	1.867109999999999900e+03	9.791599999999999682e+02	0.000000000000000000e+00	1.035400000000000091e+03	2.929360000000000127e+03	7.204299999999999500e+02	2.837619999999999891e+03	3.826380000000000109e+03	1.989390000000000100e+03	1.150111000000000058e+04	1.989390000000000100e+03	1.074138999999999942e+04	4.454029999999999745e+03	1.257553000000000065e+04	1.099597999999999956e+04	9.381459999999999127e+03	9.125110000000000582e+03	1.035400000000000091e+03	4.600029999999999745e+03	4.787710000000000036e+03	1.068789999999999964e+04
1.562647999999999956e+04	1.247269000000000051e+04	6.954520000000000437e+03	3.723460000000000036e+03	7.980079999999999927e+03	4.797640000000000327e+03	3.481820000000000164e+03	1.348305999999999949e+04	9.859770000000000437e+03	1.356930000000000064e+03	2.117039999999999964e+03	1.140189999999999964e+04	6.571819999999999709e+03	1.001896999999999935e+04	2.200780000000000200e+03	1.034214999999999964e+04	8.089859999999999673e+03	7.140409999999999854e+03	4.836710000000000036e+03	9.967959999999999127e+03	8.328200000000000500e+02	5.158960000000000036e+03	6.466199999999999818e+03	4.188760000000000218e+03	5.589000000000000000e+03	5.464210000000000036e+03	7.337890000000000327e+03	9.702790000000000873e+03	4.950979999999999563e+03	8.318700000000000045e+02	6.303999999999999915e+01	1.035400000000000091e+03	0.000000000000000000e+00	3.955949999999999818e+03	1.755630000000000109e+03	1.803130000000000109e+03	2.792289999999999964e+03	3.023280000000000200e+03	1.047619000000000051e+04	3.023280000000000200e+03	9.711610000000000582e+03	5.464210000000000036e+03	1.348653000000000065e+04	9.967959999999999127e+03	8.346649999999999636e+03	8.089859999999999673e+03	0.000000000000000000e+00	5.609649999999999636e+03	5.795060000000000400e+03	1.162575000000000000e+04
1.735031999999999971e+04	1.422169000000000051e+04	9.346309999999999491e+03	6.243140000000000327e+03	1.035429999999999927e+04	3.033940000000000055e+03	2.021359999999999900e+03	1.513720000000000073e+04	1.207497999999999956e+04	2.599019999999999982e+03	4.568670000000000073e+03	1.340326000000000022e+04	8.970639999999999418e+03	8.400399999999999636e+03	4.653029999999999745e+03	1.247662000000000080e+04	1.202338999999999942e+04	1.107369000000000051e+04	9.176599999999999682e+02	1.384394000000000051e+04	4.784119999999999891e+03	9.106680000000000291e+03	2.592309999999999945e+03	8.131470000000000255e+03	1.690289999999999964e+03	1.561579999999999927e+03	3.487000000000000000e+03	1.358837999999999920e+04	8.897239999999999782e+03	4.785250000000000000e+03	3.902929999999999836e+03	2.929360000000000127e+03	3.955949999999999818e+03	0.000000000000000000e+00	2.215889999999999873e+03	5.756850000000000364e+03	6.745899999999999636e+03	9.622200000000000273e+02	1.433410000000000036e+04	9.622200000000000273e+02	1.359840999999999985e+04	1.561579999999999927e+03	9.891049999999999272e+03	1.384394000000000051e+04	1.227325000000000000e+04	1.202338999999999942e+04	3.955949999999999818e+03	1.707000000000000000e+03	1.899619999999999891e+03	7.943340000000000146e+03
1.613511000000000058e+04	1.297070000000000073e+04	7.717489999999999782e+03	4.460470000000000255e+03	8.751110000000000582e+03	3.761130000000000109e+03	2.316500000000000000e+03	1.394252000000000044e+04	1.057035000000000036e+04	4.281899999999999977e+02	2.674639999999999873e+03	1.201759000000000015e+04	7.330920000000000073e+03	9.287510000000000218e+03	2.769639999999999873e+03	1.101576000000000022e+04	9.844829999999999927e+03	8.895239999999999782e+03	3.115420000000000073e+03	1.170935000000000036e+04	2.588369999999999891e+03	6.914460000000000036e+03	4.772319999999999709e+03	5.944260000000000218e+03	3.880300000000000182e+03	3.753230000000000018e+03	5.657789999999999964e+03	1.144695000000000073e+04	6.706590000000000146e+03	2.587449999999999818e+03	1.699599999999999909e+03	7.204299999999999500e+02	1.755630000000000109e+03	2.215889999999999873e+03	0.000000000000000000e+00	3.558059999999999945e+03	4.546770000000000437e+03	1.269680000000000064e+03	1.221213999999999942e+04	1.269680000000000064e+03	1.145612000000000080e+04	3.753230000000000018e+03	1.194235000000000036e+04	1.170935000000000036e+04	1.010059000000000015e+04	9.844829999999999927e+03	1.755630000000000109e+03	3.899469999999999800e+03	4.088809999999999945e+03	1.003647999999999956e+04
1.522547999999999956e+04	1.213322999999999956e+04	6.507479999999999563e+03	3.683510000000000218e+03	7.468609999999999673e+03	6.246350000000000364e+03	5.076039999999999964e+03	1.316660000000000036e+04	9.348100000000000364e+03	3.158590000000000146e+03	2.802070000000000164e+03	1.095617000000000007e+04	6.154510000000000218e+03	1.106897999999999956e+04	2.835679999999999836e+03	9.858489999999999782e+03	6.292399999999999636e+03	5.343789999999999964e+03	6.630560000000000400e+03	8.199440000000000509e+03	9.727500000000000000e+02	3.356750000000000000e+03	8.244430000000000291e+03	2.390250000000000000e+03	7.376229999999999563e+03	7.252699999999999818e+03	9.106729999999999563e+03	7.929270000000000437e+03	3.149480000000000018e+03	9.717999999999999545e+02	1.858480000000000018e+03	2.837619999999999891e+03	1.803130000000000109e+03	5.756850000000000364e+03	3.558059999999999945e+03	0.000000000000000000e+00	9.892699999999999818e+02	4.826369999999999891e+03	8.717000000000000000e+03	4.826369999999999891e+03	7.937369999999999891e+03	7.252699999999999818e+03	1.514776000000000022e+04	8.199440000000000509e+03	6.552390000000000327e+03	6.292399999999999636e+03	1.803130000000000109e+03	7.397460000000000036e+03	7.580729999999999563e+03	1.332498999999999978e+04
1.507397999999999956e+04	1.203926000000000022e+04	6.447380000000000109e+03	4.004460000000000036e+03	7.344020000000000437e+03	7.118529999999999745e+03	6.006960000000000036e+03	1.307682999999999993e+04	9.187840000000000146e+03	4.147840000000000146e+03	3.519150000000000091e+03	1.081339999999999964e+04	6.123720000000000255e+03	1.173618000000000029e+04	3.532199999999999818e+03	9.707260000000000218e+03	5.310010000000000218e+03	4.362770000000000437e+03	7.617829999999999927e+03	7.241039999999999964e+03	1.961809999999999945e+03	2.369840000000000146e+03	9.226399999999999636e+03	1.411759999999999991e+03	8.361389999999999418e+03	8.238280000000000655e+03	1.008507999999999993e+04	6.967029999999999745e+03	2.163920000000000073e+03	1.961069999999999936e+03	2.847360000000000127e+03	3.826380000000000109e+03	2.792289999999999964e+03	6.745899999999999636e+03	4.546770000000000437e+03	9.892699999999999818e+02	0.000000000000000000e+00	5.815409999999999854e+03	7.765510000000000218e+03	5.815409999999999854e+03	6.974529999999999745e+03	8.238280000000000655e+03	1.607829000000000087e+04	7.241039999999999964e+03	5.573020000000000437e+03	5.310010000000000218e+03	2.792289999999999964e+03	8.382799999999999272e+03	8.565350000000000364e+03	1.427325000000000000e+04
1.669311999999999898e+04	1.354576000000000022e+04	8.526329999999999927e+03	5.363039999999999964e+03	9.545770000000000437e+03	3.308460000000000036e+03	1.984640000000000100e+03	1.448395000000000073e+04	1.130397999999999956e+04	1.672380000000000109e+03	3.648699999999999818e+03	1.267686000000000058e+04	8.145859999999999673e+03	8.846250000000000000e+03	3.736119999999999891e+03	1.172169000000000051e+04	1.110898999999999978e+04	1.015920999999999913e+04	1.877579999999999927e+03	1.295801000000000022e+04	3.855349999999999909e+03	8.181960000000000036e+03	3.550469999999999800e+03	7.210210000000000036e+03	2.649760000000000218e+03	2.521250000000000000e+03	4.443739999999999782e+03	1.269825000000000000e+04	7.973649999999999636e+03	3.855039999999999964e+03	2.968070000000000164e+03	1.989390000000000100e+03	3.023280000000000200e+03	9.622200000000000273e+02	1.269680000000000064e+03	4.826369999999999891e+03	5.815409999999999854e+03	0.000000000000000000e+00	1.345579999999999927e+04	0.000000000000000000e+00	1.270776000000000022e+04	2.521250000000000000e+03	1.081647999999999956e+04	1.295801000000000022e+04	1.136293000000000029e+04	1.110898999999999978e+04	3.023280000000000200e+03	2.667110000000000127e+03	2.859199999999999818e+03	8.880969999999999345e+03
1.809327000000000044e+04	1.579286000000000058e+04	1.150363999999999942e+04	1.088338999999999942e+04	1.185929000000000087e+04	1.384545000000000073e+04	1.314602000000000044e+04	1.671716999999999825e+04	1.306626000000000022e+04	1.179170000000000073e+04	1.112534000000000015e+04	1.447332999999999993e+04	1.139270000000000073e+04	1.678190999999999985e+04	1.111334000000000015e+04	1.352654999999999927e+04	2.675150000000000091e+03	3.514159999999999854e+03	1.514337000000000080e+04	5.629199999999999591e+02	9.652899999999999636e+03	5.471369999999999891e+03	1.663963999999999942e+04	6.362619999999999891e+03	1.583688999999999942e+04	1.572269000000000051e+04	1.743541999999999825e+04	8.611699999999999591e+02	5.655039999999999964e+03	9.658129999999999200e+03	1.053632999999999993e+04	1.150111000000000058e+04	1.047619000000000051e+04	1.433410000000000036e+04	1.221213999999999942e+04	8.717000000000000000e+03	7.765510000000000218e+03	1.345579999999999927e+04	0.000000000000000000e+00	1.345579999999999927e+04	8.623799999999999955e+02	1.572269000000000051e+04	2.281333000000000175e+04	5.629199999999999591e+02	2.378989999999999782e+03	2.675150000000000091e+03	1.047619000000000051e+04	1.586071999999999935e+04	1.602873999999999978e+04	2.121763000000000102e+04
1.669311999999999898e+04	1.354576000000000022e+04	8.526329999999999927e+03	5.363039999999999964e+03	9.545770000000000437e+03	3.308460000000000036e+03	1.984640000000000100e+03	1.448395000000000073e+04	1.130397999999999956e+04	1.672380000000000109e+03	3.648699999999999818e+03	1.267686000000000058e+04	8.145859999999999673e+03	8.846250000000000000e+03	3.736119999999999891e+03	1.172169000000000051e+04	1.110898999999999978e+04	1.015920999999999913e+04	1.877579999999999927e+03	1.295801000000000022e+04	3.855349999999999909e+03	8.181960000000000036e+03	3.550469999999999800e+03	7.210210000000000036e+03	2.649760000000000218e+03	2.521250000000000000e+03	4.443739999999999782e+03	1.269825000000000000e+04	7.973649999999999636e+03	3.855039999999999964e+03	2.968070000000000164e+03	1.989390000000000100e+03	3.023280000000000200e+03	9.622200000000000273e+02	1.269680000000000064e+03	4.826369999999999891e+03	5.815409999999999854e+03	0.000000000000000000e+00	1.345579999999999927e+04	0.000000000000000000e+00	1.270776000000000022e+04	2.521250000000000000e+03	1.081647999999999956e+04	1.295801000000000022e+04	1.136293000000000029e+04	1.110898999999999978e+04	3.023280000000000200e+03	2.667110000000000127e+03	2.859199999999999818e+03	8.880969999999999345e+03
1.737709000000000015e+04	1.502030999999999949e+04	1.065576000000000022e+04	1.002694000000000051e+04	1.102814999999999964e+04	1.322537999999999920e+04	1.247179999999999927e+04	1.595610000000000036e+04	1.226861000000000058e+04	1.103887999999999920e+04	1.029784000000000015e+04	1.369684000000000015e+04	1.054000000000000000e+04	1.637655999999999949e+04	1.028370000000000073e+04	1.273522999999999956e+04	1.814619999999999891e+03	2.674280000000000200e+03	1.442117000000000007e+04	3.001299999999999955e+02	8.883870000000000800e+03	4.653250000000000000e+03	1.594045000000000073e+04	5.565430000000000291e+03	1.512517000000000007e+04	1.500914999999999964e+04	1.674852000000000044e+04	2.112000000000000099e+01	4.842439999999999600e+03	8.888069999999999709e+03	9.770950000000000728e+03	1.074138999999999942e+04	9.711610000000000582e+03	1.359840999999999985e+04	1.145612000000000080e+04	7.937369999999999891e+03	6.974529999999999745e+03	1.270776000000000022e+04	8.623799999999999955e+02	1.270776000000000022e+04	0.000000000000000000e+00	1.500914999999999964e+04	2.223181000000000131e+04	3.001299999999999955e+02	1.518500000000000000e+03	1.814619999999999891e+03	9.711610000000000582e+03	1.514863999999999942e+04	1.531956999999999971e+04	2.060213000000000102e+04
1.856590999999999985e+04	1.547128000000000065e+04	1.078495999999999913e+04	7.751890000000000327e+03	1.177702000000000044e+04	3.075469999999999800e+03	2.774440000000000055e+03	1.635428000000000065e+04	1.344911000000000058e+04	4.113859999999999673e+03	6.112970000000000255e+03	1.471917000000000007e+04	1.041575000000000000e+04	7.737539999999999964e+03	6.195140000000000327e+03	1.383034000000000015e+04	1.347731999999999971e+04	1.252937999999999920e+04	6.439700000000000273e+02	1.524625000000000000e+04	6.282130000000000109e+03	1.058356999999999971e+04	1.031180000000000064e+03	9.605049999999999272e+03	1.287700000000000102e+02	0.000000000000000000e+00	1.926529999999999973e+03	1.499825000000000000e+04	1.037268000000000029e+04	6.285239999999999782e+03	5.414329999999999927e+03	4.454029999999999745e+03	5.464210000000000036e+03	1.561579999999999927e+03	3.753230000000000018e+03	7.252699999999999818e+03	8.238280000000000655e+03	2.521250000000000000e+03	1.572269000000000051e+04	2.521250000000000000e+03	1.500914999999999964e+04	0.000000000000000000e+00	8.365590000000000146e+03	1.524625000000000000e+04	1.371975000000000000e+04	1.347731999999999971e+04	5.464210000000000036e+03	1.462800000000000011e+02	3.380600000000000023e+02	6.402760000000000218e+03
2.642956999999999971e+04	2.344934999999999854e+04	1.910702000000000044e+04	1.611746999999999935e+04	2.007811999999999898e+04	9.053670000000000073e+03	1.007318000000000029e+04	2.425004999999999927e+04	2.167536999999999898e+04	1.222739999999999964e+04	1.445870000000000073e+04	2.283656000000000131e+04	1.874518999999999869e+04	7.645270000000000437e+03	1.454370999999999913e+04	2.202141999999999825e+04	2.096040999999999985e+04	2.005054999999999927e+04	8.991870000000000800e+03	2.241988999999999942e+04	1.423013999999999942e+04	1.826918999999999869e+04	7.357069999999999709e+03	1.731202000000000044e+04	8.239540000000000873e+03	8.365590000000000146e+03	6.481100000000000364e+03	2.221702000000000044e+04	1.805913999999999942e+04	1.423984000000000015e+04	1.344902000000000044e+04	1.257553000000000065e+04	1.348653000000000065e+04	9.891049999999999272e+03	1.194235000000000036e+04	1.514776000000000022e+04	1.607829000000000087e+04	1.081647999999999956e+04	2.281333000000000175e+04	1.081647999999999956e+04	2.223181000000000131e+04	8.365590000000000146e+03	0.000000000000000000e+00	2.241988999999999942e+04	2.115879000000000087e+04	2.096040999999999985e+04	1.348653000000000065e+04	8.228209999999999127e+03	8.037909999999999854e+03	1.998730000000000018e+03
1.763356999999999971e+04	1.529495000000000073e+04	1.095315999999999985e+04	1.032255999999999949e+04	1.132082999999999993e+04	1.342654000000000087e+04	1.269337999999999920e+04	1.622710000000000036e+04	1.255104999999999927e+04	1.129077000000000044e+04	1.058019000000000051e+04	1.397264999999999964e+04	1.083861000000000058e+04	1.649915000000000146e+04	1.056696999999999935e+04	1.301570000000000073e+04	2.112460000000000036e+03	2.960940000000000055e+03	1.466154999999999927e+04	0.000000000000000000e+00	9.141840000000000146e+03	4.930649999999999636e+03	1.617213999999999942e+04	5.834109999999999673e+03	1.536157999999999993e+04	1.524625000000000000e+04	1.697559999999999854e+04	2.982699999999999818e+02	5.117479999999999563e+03	9.146459999999999127e+03	1.002762999999999920e+04	1.099597999999999956e+04	9.967959999999999127e+03	1.384394000000000051e+04	1.170935000000000036e+04	8.199440000000000509e+03	7.241039999999999964e+03	1.295801000000000022e+04	5.629199999999999591e+02	1.295801000000000022e+04	3.001299999999999955e+02	1.524625000000000000e+04	2.241988999999999942e+04	0.000000000000000000e+00	1.816279999999999973e+03	2.112460000000000036e+03	9.967959999999999127e+03	1.538519000000000051e+04	1.555502000000000044e+04	2.080268999999999869e+04
1.623171999999999935e+04	1.375367000000000007e+04	9.202959999999999127e+03	8.509829999999999927e+03	9.623739999999999782e+03	1.211178000000000065e+04	1.126215999999999985e+04	1.471380999999999949e+04	1.094876000000000022e+04	9.690549999999999272e+03	8.819879999999999200e+03	1.242440999999999985e+04	9.071709999999999127e+03	1.563713999999999942e+04	8.802319999999999709e+03	1.142968000000000029e+04	2.961800000000000068e+02	1.211349999999999909e+03	1.311788999999999942e+04	1.816279999999999973e+03	7.514289999999999964e+03	3.213639999999999873e+03	1.467418000000000029e+04	4.162699999999999818e+03	1.383870999999999913e+04	1.371975000000000000e+04	1.550209000000000015e+04	1.518359999999999900e+03	3.413340000000000146e+03	7.516520000000000437e+03	8.404260000000000218e+03	9.381459999999999127e+03	8.346649999999999636e+03	1.227325000000000000e+04	1.010059000000000015e+04	6.552390000000000327e+03	5.573020000000000437e+03	1.136293000000000029e+04	2.378989999999999782e+03	1.136293000000000029e+04	1.518500000000000000e+03	1.371975000000000000e+04	2.115879000000000087e+04	1.816279999999999973e+03	0.000000000000000000e+00	2.961800000000000068e+02	8.346649999999999636e+03	1.386147999999999956e+04	1.403715999999999985e+04	1.947283000000000175e+04
1.601129999999999927e+04	1.350905999999999949e+04	8.920209999999999127e+03	8.214350000000000364e+03	9.351430000000000291e+03	1.190947999999999956e+04	1.103915999999999985e+04	1.447389999999999964e+04	1.069420000000000073e+04	9.436739999999999782e+03	8.534909999999999854e+03	1.217920999999999913e+04	8.785620000000000800e+03	1.551164999999999964e+04	8.516489999999999782e+03	1.117793000000000029e+04	0.000000000000000000e+00	9.498300000000000409e+02	1.287261000000000058e+04	2.112460000000000036e+03	7.257130000000000109e+03	2.944750000000000000e+03	1.443651000000000022e+04	3.902190000000000055e+03	1.359688999999999942e+04	1.347731999999999971e+04	1.526845999999999913e+04	1.814529999999999973e+03	3.147139999999999873e+03	7.258869999999999891e+03	8.147010000000000218e+03	9.125110000000000582e+03	8.089859999999999673e+03	1.202338999999999942e+04	9.844829999999999927e+03	6.292399999999999636e+03	5.310010000000000218e+03	1.110898999999999978e+04	2.675150000000000091e+03	1.110898999999999978e+04	1.814619999999999891e+03	1.347731999999999971e+04	2.096040999999999985e+04	2.112460000000000036e+03	2.961800000000000068e+02	0.000000000000000000e+00	8.089859999999999673e+03	1.361948999999999978e+04	1.379615999999999985e+04	1.926308000000000175e+04
1.562647999999999956e+04	1.247269000000000051e+04	6.954520000000000437e+03	3.723460000000000036e+03	7.980079999999999927e+03	4.797640000000000327e+03	3.481820000000000164e+03	1.348305999999999949e+04	9.859770000000000437e+03	1.356930000000000064e+03	2.117039999999999964e+03	1.140189999999999964e+04	6.571819999999999709e+03	1.001896999999999935e+04	2.200780000000000200e+03	1.034214999999999964e+04	8.089859999999999673e+03	7.140409999999999854e+03	4.836710000000000036e+03	9.967959999999999127e+03	8.328200000000000500e+02	5.158960000000000036e+03	6.466199999999999818e+03	4.188760000000000218e+03	5.589000000000000000e+03	5.464210000000000036e+03	7.337890000000000327e+03	9.702790000000000873e+03	4.950979999999999563e+03	8.318700000000000045e+02	6.303999999999999915e+01	1.035400000000000091e+03	0.000000000000000000e+00	3.955949999999999818e+03	1.755630000000000109e+03	1.803130000000000109e+03	2.792289999999999964e+03	3.023280000000000200e+03	1.047619000000000051e+04	3.023280000000000200e+03	9.711610000000000582e+03	5.464210000000000036e+03	1.348653000000000065e+04	9.967959999999999127e+03	8.346649999999999636e+03	8.089859999999999673e+03	0.000000000000000000e+00	5.609649999999999636e+03	5.795060000000000400e+03	1.162575000000000000e+04
1.867168999999999869e+04	1.558101000000000022e+04	1.091468000000000029e+04	7.889619999999999891e+03	1.190490999999999985e+04	3.134960000000000036e+03	2.889219999999999800e+03	1.646061999999999898e+04	1.357170999999999913e+04	4.259680000000000291e+03	6.255100000000000364e+03	1.483564999999999964e+04	1.054621999999999935e+04	7.704680000000000291e+03	6.336979999999999563e+03	1.395079999999999927e+04	1.361948999999999978e+04	1.267170999999999913e+04	7.896000000000000227e+02	1.538519000000000051e+04	6.427100000000000364e+03	1.072717000000000007e+04	8.868300000000000409e+02	9.748559999999999491e+03	2.632000000000000028e+01	1.462800000000000011e+02	1.782369999999999891e+03	1.513768000000000029e+04	1.051621999999999935e+04	6.430279999999999745e+03	5.559869999999999891e+03	4.600029999999999745e+03	5.609649999999999636e+03	1.707000000000000000e+03	3.899469999999999800e+03	7.397460000000000036e+03	8.382799999999999272e+03	2.667110000000000127e+03	1.586071999999999935e+04	2.667110000000000127e+03	1.514863999999999942e+04	1.462800000000000011e+02	8.228209999999999127e+03	1.538519000000000051e+04	1.386147999999999956e+04	1.361948999999999978e+04	5.609649999999999636e+03	0.000000000000000000e+00	1.931699999999999875e+02	6.262989999999999782e+03
1.883391999999999825e+04	1.574737000000000080e+04	1.109970000000000073e+04	8.080470000000000255e+03	1.208837999999999920e+04	3.189550000000000182e+03	3.022139999999999873e+03	1.662349000000000160e+04	1.375050000000000000e+04	4.446579999999999927e+03	6.448000000000000000e+03	1.500869000000000051e+04	1.073184000000000015e+04	7.631430000000000291e+03	6.529800000000000182e+03	1.412761000000000058e+04	1.379615999999999985e+04	1.284876000000000022e+04	9.820199999999999818e+02	1.555502000000000044e+04	6.610989999999999782e+03	1.090725000000000000e+04	6.936699999999999591e+02	9.928459999999999127e+03	2.094399999999999977e+02	3.380600000000000023e+02	1.589200000000000045e+03	1.530851000000000022e+04	1.069617000000000007e+04	6.614390000000000327e+03	5.745649999999999636e+03	4.787710000000000036e+03	5.795060000000000400e+03	1.899619999999999891e+03	4.088809999999999945e+03	7.580729999999999563e+03	8.565350000000000364e+03	2.859199999999999818e+03	1.602873999999999978e+04	2.859199999999999818e+03	1.531956999999999971e+04	3.380600000000000023e+02	8.037909999999999854e+03	1.555502000000000044e+04	1.403715999999999985e+04	1.379615999999999985e+04	5.795060000000000400e+03	1.931699999999999875e+02	0.000000000000000000e+00	6.071250000000000000e+03
2.444752999999999884e+04	2.145779999999999927e+04	1.711711999999999898e+04	1.415015999999999985e+04	1.808490999999999985e+04	7.376750000000000000e+03	8.273459999999999127e+03	2.226424000000000160e+04	1.967716999999999825e+04	1.033920999999999913e+04	1.251109000000000015e+04	2.083881000000000131e+04	1.675684000000000015e+04	7.110659999999999854e+03	1.259454000000000087e+04	2.002270999999999913e+04	1.926308000000000175e+04	1.833993999999999869e+04	7.035949999999999818e+03	2.080268999999999869e+04	1.239009000000000015e+04	1.651127999999999884e+04	5.384500000000000000e+03	1.554406999999999971e+04	6.275520000000000437e+03	6.402760000000000218e+03	4.500250000000000000e+03	2.058818999999999869e+04	1.629995000000000073e+04	1.239843000000000029e+04	1.158537000000000080e+04	1.068789999999999964e+04	1.162575000000000000e+04	7.943340000000000146e+03	1.003647999999999956e+04	1.332498999999999978e+04	1.427325000000000000e+04	8.880969999999999345e+03	2.121763000000000102e+04	8.880969999999999345e+03	2.060213000000000102e+04	6.402760000000000218e+03	1.998730000000000018e+03	2.080268999999999869e+04	1.947283000000000175e+04	1.926308000000000175e+04	1.162575000000000000e+04	6.262989999999999782e+03	6.071250000000000000e+03	0.000000000000000000e+00
1.526067000000000007e+04	1.233442000000000007e+04	6.899569999999999709e+03	4.995149999999999636e+03	7.680770000000000437e+03	8.275809999999999491e+03	7.264569999999999709e+03	1.336721999999999935e+04	9.431450000000000728e+03	5.536609999999999673e+03	4.830899999999999636e+03	1.105532999999999993e+04	6.625890000000000327e+03	1.254775000000000000e+04	4.831340000000000146e+03	9.954280000000000655e+03	3.903190000000000055e+03	2.954280000000000200e+03	8.988260000000000218e+03	5.831180000000000291e+03	3.354349999999999909e+03	9.842000000000000455e+02	1.057570999999999913e+04	2.182999999999999829e+01	9.722370000000000800e+03	9.600950000000000728e+03	1.142280999999999949e+04	5.555710000000000036e+03	7.724900000000000091e+02	3.355849999999999909e+03	4.244069999999999709e+03	5.222539999999999964e+03	4.187159999999999854e+03	8.128649999999999636e+03	5.942550000000000182e+03	2.389590000000000146e+03	1.412900000000000091e+03	7.208180000000000291e+03	6.359000000000000000e+03	7.208180000000000291e+03	5.563010000000000218e+03	9.600950000000000728e+03	1.730265999999999985e+04	5.831180000000000291e+03	4.162930000000000291e+03	3.903190000000000055e+03	4.187159999999999854e+03	9.744399999999999636e+03	9.924149999999999636e+03	1.553586000000000058e+04
1.443067000000000007e+04	1.378996999999999935e+04	1.565138999999999942e+04	1.637768000000000029e+04	1.558261000000000058e+04	1.997822999999999956e+04	1.900822000000000116e+04	1.357635000000000036e+04	1.517759000000000015e+04	1.799063000000000102e+04	1.686304999999999927e+04	1.459079999999999927e+04	1.569365999999999985e+04	2.463329000000000087e+04	1.682459999999999854e+04	1.494661000000000058e+04	2.435152000000000044e+04	2.362425999999999840e+04	1.704270999999999913e+04	2.644816999999999825e+04	1.912304000000000087e+04	2.195058000000000175e+04	1.723758000000000175e+04	2.135381999999999971e+04	1.709554999999999927e+04	1.708015000000000146e+04	1.744643999999999869e+04	2.615072000000000116e+04	2.183106999999999971e+04	1.910275000000000000e+04	1.856374000000000160e+04	1.803040000000000146e+04	1.861940000000000146e+04	1.701677999999999884e+04	1.766377999999999884e+04	1.965875000000000000e+04	2.025986999999999898e+04	1.713686999999999898e+04	2.700908000000000175e+04	1.713686999999999898e+04	2.614804999999999927e+04	1.708015000000000146e+04	2.124270999999999913e+04	2.644816999999999825e+04	2.464525999999999840e+04	2.435152000000000044e+04	1.861940000000000146e+04	1.707679999999999927e+04	1.710947999999999956e+04	1.976222000000000116e+04
1.373456999999999971e+04	1.281537999999999920e+04	1.432219000000000051e+04	1.493375000000000000e+04	1.430438999999999942e+04	1.850095000000000073e+04	1.751950999999999840e+04	1.269292000000000007e+04	1.400769000000000051e+04	1.649384000000000015e+04	1.538461000000000058e+04	1.352825000000000000e+04	1.434712000000000080e+04	2.320490000000000146e+04	1.534748999999999978e+04	1.380819000000000051e+04	2.295322999999999956e+04	2.221250000000000000e+04	1.557062000000000080e+04	2.505508000000000175e+04	1.763749000000000160e+04	2.051595000000000073e+04	1.580075000000000000e+04	1.990433000000000175e+04	1.563800000000000000e+04	1.561996999999999935e+04	1.603361000000000058e+04	2.475722000000000116e+04	2.039295999999999913e+04	1.761734000000000015e+04	1.707218000000000029e+04	1.653447999999999956e+04	1.712806000000000131e+04	1.553165999999999985e+04	1.616673999999999978e+04	1.818268000000000029e+04	1.879524000000000160e+04	1.564323999999999978e+04	2.561686999999999898e+04	1.564323999999999978e+04	2.475500999999999840e+04	1.561996999999999935e+04	2.002272999999999956e+04	2.505508000000000175e+04	2.324775999999999840e+04	2.295322999999999956e+04	1.712806000000000131e+04	1.561963999999999942e+04	1.565643000000000029e+04	1.848734000000000015e+04
1.654018000000000029e+04	1.631981999999999971e+04	1.862150999999999840e+04	1.945645000000000073e+04	1.849445000000000073e+04	2.295147000000000116e+04	2.202229999999999927e+04	1.598026000000000022e+04	1.795718000000000029e+04	2.106384000000000015e+04	1.995754999999999927e+04	1.723288999999999942e+04	1.868261000000000058e+04	2.746452000000000044e+04	1.991897999999999956e+04	1.768686000000000058e+04	2.738586999999999898e+04	2.667261000000000058e+04	2.000404000000000087e+04	2.947590999999999985e+04	2.221670999999999913e+04	2.502034000000000015e+04	2.010570999999999913e+04	2.443508000000000175e+04	2.001659000000000015e+04	2.000824000000000160e+04	2.025665999999999985e+04	2.917904000000000087e+04	2.490370999999999913e+04	2.219647000000000116e+04	2.165306999999999971e+04	2.110959999999999854e+04	2.170900000000000000e+04	2.001925999999999840e+04	2.073152000000000044e+04	2.275295000000000073e+04	2.335022000000000116e+04	2.017402999999999884e+04	3.003556000000000131e+04	2.017402999999999884e+04	2.917588000000000102e+04	2.000824000000000160e+04	2.361440999999999985e+04	2.947590999999999985e+04	2.767863999999999942e+04	2.738586999999999898e+04	2.170900000000000000e+04	1.999684000000000015e+04	2.001872000000000116e+04	2.225865000000000146e+04
1.546620999999999913e+04	1.261707999999999993e+04	9.305129999999999200e+03	7.340800000000000182e+03	1.008404000000000087e+04	7.599409999999999854e+03	6.733699999999999818e+03	1.333197999999999956e+04	1.131917000000000007e+04	6.341380000000000109e+03	6.546319999999999709e+03	1.220310000000000036e+04	9.026399999999999636e+03	1.239921999999999935e+04	6.571229999999999563e+03	1.156111000000000058e+04	1.507535000000000036e+04	1.415754000000000087e+04	4.654449999999999818e+03	1.710109999999999854e+04	8.159029999999999745e+03	1.217051000000000022e+04	5.021619999999999891e+03	1.128636000000000058e+04	4.737729999999999563e+03	4.711020000000000437e+03	5.458409999999999854e+03	1.681763999999999942e+04	1.198453000000000065e+04	8.147369999999999891e+03	7.349829999999999927e+03	6.516609999999999673e+03	7.412840000000000146e+03	4.712609999999999673e+03	5.933199999999999818e+03	9.006620000000000800e+03	9.904319999999999709e+03	5.046220000000000255e+03	1.763943000000000029e+04	5.046220000000000255e+03	1.682320999999999913e+04	4.711020000000000437e+03	1.108288999999999942e+04	1.710109999999999854e+04	1.535809000000000015e+04	1.507535000000000036e+04	7.412840000000000146e+03	4.720920000000000073e+03	4.775390000000000327e+03	9.152079999999999927e+03
1.767195999999999913e+04	1.788268000000000029e+04	2.071856999999999971e+04	2.178975000000000000e+04	2.050070999999999913e+04	2.558979999999999927e+04	2.463484000000000015e+04	1.741661999999999898e+04	1.978815000000000146e+04	2.360425999999999840e+04	2.239184999999999854e+04	1.890713000000000102e+04	2.081175000000000000e+04	3.014350999999999840e+04	2.234854999999999927e+04	1.947172000000000116e+04	2.957631000000000131e+04	2.889850999999999840e+04	2.264734999999999854e+04	3.164684999999999854e+04	2.467659999999999854e+04	2.731018000000000029e+04	2.277749000000000160e+04	2.676752999999999884e+04	2.267513999999999942e+04	2.266450000000000000e+04	2.293675999999999840e+04	3.135190999999999985e+04	2.720325000000000000e+04	2.465572000000000116e+04	2.414459999999999854e+04	2.363615999999999985e+04	2.419918999999999869e+04	2.263986999999999898e+04	2.328263000000000102e+04	2.517365999999999985e+04	2.573083000000000175e+04	2.276600000000000000e+04	3.220259999999999854e+04	2.276600000000000000e+04	3.134765999999999985e+04	2.266450000000000000e+04	2.625129000000000087e+04	3.164684999999999854e+04	2.986618000000000029e+04	2.957631000000000131e+04	2.419918999999999869e+04	2.265570000000000073e+04	2.268079000000000087e+04	2.492138000000000102e+04
1.622025000000000000e+04	1.594123999999999978e+04	1.818127000000000044e+04	1.899868000000000029e+04	1.806284999999999854e+04	2.250006999999999971e+04	2.156647000000000116e+04	1.561880999999999949e+04	1.754452999999999884e+04	2.060243999999999869e+04	1.949584000000000015e+04	1.683931000000000131e+04	1.823950999999999840e+04	2.703011999999999898e+04	1.945738999999999942e+04	1.727968999999999869e+04	2.693618999999999869e+04	2.622052000000000044e+04	1.955365999999999985e+04	2.902741999999999825e+04	2.175452000000000044e+04	2.456440000000000146e+04	1.966579000000000087e+04	2.397690999999999985e+04	1.957065999999999985e+04	1.956152000000000044e+04	1.982349000000000160e+04	2.873043999999999869e+04	2.444722999999999956e+04	2.173427999999999884e+04	2.119075999999999840e+04	2.064777000000000044e+04	2.124668000000000029e+04	1.956450000000000000e+04	2.027054000000000087e+04	2.229147999999999956e+04	2.289000000000000000e+04	1.971579000000000087e+04	2.958729999999999927e+04	1.971579000000000087e+04	2.872736000000000058e+04	1.956152000000000044e+04	2.323663000000000102e+04	2.902741999999999825e+04	2.722913000000000102e+04	2.693618999999999869e+04	2.124668000000000029e+04	1.955102000000000044e+04	1.957411000000000058e+04	2.186443000000000029e+04
1.504687999999999920e+04	1.236556999999999971e+04	9.728750000000000000e+03	8.215840000000000146e+03	1.039518000000000029e+04	9.134889999999999418e+03	8.275059999999999491e+03	1.298661000000000058e+04	1.141537999999999920e+04	7.775949999999999818e+03	7.682479999999999563e+03	1.211217000000000007e+04	9.495739999999999782e+03	1.383337000000000080e+04	7.693329999999999927e+03	1.159284000000000015e+04	1.620055999999999949e+04	1.530185000000000036e+04	6.184739999999999782e+03	1.825986000000000058e+04	9.480879999999999200e+03	1.333895000000000073e+04	6.425119999999999891e+03	1.249140999999999985e+04	6.224149999999999636e+03	6.206739999999999782e+03	6.760619999999999891e+03	1.797145000000000073e+04	1.316163999999999942e+04	9.467280000000000655e+03	8.708780000000000655e+03	7.925109999999999673e+03	8.771329999999999927e+03	6.254439999999999600e+03	7.379609999999999673e+03	1.028176000000000022e+04	1.113873999999999978e+04	6.557470000000000255e+03	1.880665999999999985e+04	6.557470000000000255e+03	1.797581000000000131e+04	6.206739999999999782e+03	1.191898999999999978e+04	1.825986000000000058e+04	1.648858000000000175e+04	1.620055999999999949e+04	8.771329999999999927e+03	6.205829999999999927e+03	6.244939999999999600e+03	1.006486000000000058e+04
1.311635000000000036e+04	1.086537000000000080e+04	9.822620000000000800e+03	9.394100000000000364e+03	1.019789999999999964e+04	1.221372999999999956e+04	1.121332999999999993e+04	1.126928000000000065e+04	1.069251000000000022e+04	1.026695999999999913e+04	9.459709999999999127e+03	1.095637999999999920e+04	9.706040000000000873e+03	1.708270000000000073e+04	9.439309999999999491e+03	1.072312000000000080e+04	1.760793000000000029e+04	1.677858000000000175e+04	9.302870000000000800e+03	1.971665999999999985e+04	1.159693000000000029e+04	1.492835000000000036e+04	9.684180000000000291e+03	1.419980999999999949e+04	9.427110000000000582e+03	9.397989999999999782e+03	1.003495999999999913e+04	1.941990999999999985e+04	1.477834000000000015e+04	1.157879000000000087e+04	1.095354999999999927e+04	1.033617000000000007e+04	1.101234000000000015e+04	9.229059999999999491e+03	9.920620000000000800e+03	1.224581999999999971e+04	1.296704999999999927e+04	9.343510000000000218e+03	2.027745999999999913e+04	9.343510000000000218e+03	1.942095999999999913e+04	9.397989999999999782e+03	1.493705999999999949e+04	1.971665999999999985e+04	1.790356000000000131e+04	1.760793000000000029e+04	1.101234000000000015e+04	9.410530000000000655e+03	9.465120000000000800e+03	1.316157999999999993e+04
1.373988999999999942e+04	1.282388999999999942e+04	1.433515999999999985e+04	1.494830999999999949e+04	1.431670000000000073e+04	1.851652000000000044e+04	1.753511000000000058e+04	1.270035000000000036e+04	1.401862000000000080e+04	1.650936000000000058e+04	1.539971999999999935e+04	1.353785000000000036e+04	1.436031999999999971e+04	2.322011999999999898e+04	1.536257999999999993e+04	1.381872999999999956e+04	2.296718000000000029e+04	2.222663000000000102e+04	1.558614999999999964e+04	2.506897000000000116e+04	1.765272999999999956e+04	2.053040000000000146e+04	1.581602000000000044e+04	1.991899000000000160e+04	1.565344000000000051e+04	1.563542000000000007e+04	1.604869000000000051e+04	2.477111000000000058e+04	2.040745000000000073e+04	1.763258000000000175e+04	1.708754999999999927e+04	1.654995999999999913e+04	1.714341999999999825e+04	1.554725000000000000e+04	1.618229000000000087e+04	1.819775999999999840e+04	1.881011999999999898e+04	1.565884000000000015e+04	2.563075000000000000e+04	1.565884000000000015e+04	2.476888999999999942e+04	1.563542000000000007e+04	2.003602999999999884e+04	2.506897000000000116e+04	2.326170000000000073e+04	2.296718000000000029e+04	1.714341999999999825e+04	1.563506999999999971e+04	1.567182999999999993e+04	1.850115999999999985e+04
1.373456999999999971e+04	1.281537999999999920e+04	1.432219000000000051e+04	1.493375000000000000e+04	1.430438999999999942e+04	1.850095000000000073e+04	1.751950999999999840e+04	1.269292000000000007e+04	1.400769000000000051e+04	1.649384000000000015e+04	1.538461000000000058e+04	1.352825000000000000e+04	1.434712000000000080e+04	2.320490000000000146e+04	1.534748999999999978e+04	1.380819000000000051e+04	2.295322999999999956e+04	2.221250000000000000e+04	1.557062000000000080e+04	2.505508000000000175e+04	1.763749000000000160e+04	2.051595000000000073e+04	1.580075000000000000e+04	1.990433000000000175e+04	1.563800000000000000e+04	1.561996999999999935e+04	1.603361000000000058e+04	2.475722000000000116e+04	2.039295999999999913e+04	1.761734000000000015e+04	1.707218000000000029e+04	1.653447999999999956e+04	1.712806000000000131e+04	1.553165999999999985e+04	1.616673999999999978e+04	1.818268000000000029e+04	1.879524000000000160e+04	1.564323999999999978e+04	2.561686999999999898e+04	1.564323999999999978e+04	2.475500999999999840e+04	1.561996999999999935e+04	2.002272999999999956e+04	2.505508000000000175e+04	2.324775999999999840e+04	2.295322999999999956e+04	1.712806000000000131e+04	1.561963999999999942e+04	1.565643000000000029e+04	1.848734000000000015e+04
1.335862999999999920e+04	1.215940999999999985e+04	1.325317000000000007e+04	1.371395999999999913e+04	1.329719000000000051e+04	1.718009999999999854e+04	1.619548999999999978e+04	1.213498999999999978e+04	1.312784000000000015e+04	1.518035000000000036e+04	1.411186000000000058e+04	1.277127000000000044e+04	1.325652000000000044e+04	2.191204999999999927e+04	1.407698999999999978e+04	1.296504000000000087e+04	2.178631999999999971e+04	2.102927999999999884e+04	1.425232999999999993e+04	2.389313000000000102e+04	1.635139999999999964e+04	1.930425999999999840e+04	1.450418000000000029e+04	1.867281999999999971e+04	1.432785000000000036e+04	1.430822999999999956e+04	1.475432999999999993e+04	2.359497000000000116e+04	1.917668000000000029e+04	1.633153000000000065e+04	1.577426000000000022e+04	1.522495999999999913e+04	1.583060000000000036e+04	1.420826000000000022e+04	1.485052000000000044e+04	1.691263999999999942e+04	1.754259999999999854e+04	1.431988999999999942e+04	2.445565999999999985e+04	1.431988999999999942e+04	2.359331000000000131e+04	1.430822999999999956e+04	1.889725999999999840e+04	2.389313000000000102e+04	2.208161000000000058e+04	2.178631999999999971e+04	1.583060000000000036e+04	1.430972999999999956e+04	1.434906999999999971e+04	1.731743000000000029e+04
1.661813000000000102e+04	1.642275000000000000e+04	1.875504000000000087e+04	1.960229000000000087e+04	1.862304999999999927e+04	2.310970999999999913e+04	2.217997000000000116e+04	1.607570999999999913e+04	1.807595999999999913e+04	2.121909000000000015e+04	2.010824000000000160e+04	1.734258000000000175e+04	1.881786000000000058e+04	2.762240999999999985e+04	2.006945000000000073e+04	1.780297000000000116e+04	2.752527000000000044e+04	2.681372999999999956e+04	2.016234999999999854e+04	2.961447000000000116e+04	2.236865999999999985e+04	2.516450000000000000e+04	2.026397999999999956e+04	2.458127000000000044e+04	2.017502000000000044e+04	2.016665999999999985e+04	2.041445999999999913e+04	2.931768000000000029e+04	2.504834000000000015e+04	2.234838999999999942e+04	2.180636000000000058e+04	2.126429999999999927e+04	2.186222999999999956e+04	2.017711999999999898e+04	2.088715999999999985e+04	2.290316999999999825e+04	2.349861999999999898e+04	2.033106999999999971e+04	3.017397000000000116e+04	2.033106999999999971e+04	2.931447000000000116e+04	2.016665999999999985e+04	2.376356000000000131e+04	2.961447000000000116e+04	2.781790999999999985e+04	2.752527000000000044e+04	2.186222999999999956e+04	2.015527000000000044e+04	2.017713999999999942e+04	2.241093000000000029e+04
1.719606000000000131e+04	1.410121999999999935e+04	9.466590000000000146e+03	6.508550000000000182e+03	1.044814999999999964e+04	3.765980000000000018e+03	2.912300000000000182e+03	1.498427000000000044e+04	1.209876000000000022e+04	3.336190000000000055e+03	4.954180000000000291e+03	1.335489999999999964e+04	9.102180000000000291e+03	8.906590000000000146e+03	5.029020000000000437e+03	1.247400000000000000e+04	1.276512999999999920e+04	1.181572999999999956e+04	9.350499999999999545e+02	1.462651000000000022e+04	5.508010000000000218e+03	9.831280000000000655e+03	2.299530000000000200e+03	8.863579999999999927e+03	1.478430000000000064e+03	1.370250000000000000e+03	3.164059999999999945e+03	1.436568000000000029e+04	9.624250000000000000e+03	5.506350000000000364e+03	4.618149999999999636e+03	3.640269999999999982e+03	4.675319999999999709e+03	9.244199999999999591e+02	2.921460000000000036e+03	6.474760000000000218e+03	7.461770000000000437e+03	1.670940000000000055e+03	1.512569000000000051e+04	1.670940000000000055e+03	1.437504000000000087e+04	1.370250000000000000e+03	9.645170000000000073e+03	1.462651000000000022e+04	1.302171999999999935e+04	1.276512999999999920e+04	4.675319999999999709e+03	1.481410000000000082e+03	1.654200000000000045e+03	7.661979999999999563e+03
1.363575000000000000e+04	1.263635000000000036e+04	1.402613999999999942e+04	1.459326000000000022e+04	1.402620999999999913e+04	1.812408000000000175e+04	1.714304999999999927e+04	1.254153000000000065e+04	1.376587999999999920e+04	1.612296999999999935e+04	1.502767000000000007e+04	1.332112999999999920e+04	1.404479000000000087e+04	2.283263999999999942e+04	1.499127000000000044e+04	1.357673999999999978e+04	2.262965999999999985e+04	2.188390999999999985e+04	1.519394000000000051e+04	2.473318000000000029e+04	1.727631000000000131e+04	2.017850999999999840e+04	1.542762000000000080e+04	1.956070999999999913e+04	1.526244000000000051e+04	1.524415999999999985e+04	1.566397999999999956e+04	2.443520000000000073e+04	2.005409000000000015e+04	1.725625000000000000e+04	1.670697000000000116e+04	1.616512000000000080e+04	1.676300999999999840e+04	1.515488999999999942e+04	1.579478000000000065e+04	1.782677999999999884e+04	1.844491999999999825e+04	1.526779999999999927e+04	2.529522999999999956e+04	1.526779999999999927e+04	2.443315000000000146e+04	1.524415999999999985e+04	1.968947000000000116e+04	2.473318000000000029e+04	2.292443999999999869e+04	2.262965999999999985e+04	1.676300999999999840e+04	1.524412000000000080e+04	1.528132999999999993e+04	1.814302999999999884e+04
1.299723999999999978e+04	1.076998999999999978e+04	9.811129999999999200e+03	9.438450000000000728e+03	1.017046999999999935e+04	1.235319000000000051e+04	1.134437000000000080e+04	1.116246999999999935e+04	1.063695000000000073e+04	1.037453000000000065e+04	9.533329999999999927e+03	1.087821999999999935e+04	9.700840000000000146e+03	1.723620000000000073e+04	9.511450000000000728e+03	1.065998999999999978e+04	1.765049000000000160e+04	1.682547999999999956e+04	9.446479999999999563e+03	1.976022000000000116e+04	1.168314999999999964e+04	1.498297999999999956e+04	9.839690000000000509e+03	1.426145000000000073e+04	9.576899999999999636e+03	9.546829999999999927e+03	1.019462999999999920e+04	1.946324000000000160e+04	1.483454999999999927e+04	1.166480999999999949e+04	1.104737999999999920e+04	1.043952000000000044e+04	1.110588999999999942e+04	9.363920000000000073e+03	1.003129999999999927e+04	1.232326000000000022e+04	1.303646999999999935e+04	9.467840000000000146e+03	2.032140000000000146e+04	9.467840000000000146e+03	1.946411000000000058e+04	9.546829999999999927e+03	1.510207999999999993e+04	1.976022000000000116e+04	1.794627000000000044e+04	1.765049000000000160e+04	1.110588999999999942e+04	9.560469999999999345e+03	9.616399999999999636e+03	1.332710000000000036e+04
1.547932999999999993e+04	1.261476000000000022e+04	9.238420000000000073e+03	7.232579999999999927e+03	1.002751000000000022e+04	7.451670000000000073e+03	6.578939999999999600e+03	1.333878000000000065e+04	1.128276000000000022e+04	6.186109999999999673e+03	6.414500000000000000e+03	1.218473999999999978e+04	8.955530000000000655e+03	1.227357999999999993e+04	6.440659999999999854e+03	1.153095000000000073e+04	1.494051000000000022e+04	1.402135000000000036e+04	4.509199999999999818e+03	1.696325000000000000e+04	8.010710000000000036e+03	1.203286000000000058e+04	4.905600000000000364e+03	1.114604000000000087e+04	4.604659999999999854e+03	4.575710000000000036e+03	5.359680000000000291e+03	1.668022000000000116e+04	1.184623999999999978e+04	7.999199999999999818e+03	7.199109999999999673e+03	6.362829999999999927e+03	7.262130000000000109e+03	4.558060000000000400e+03	5.777380000000000109e+03	8.861530000000000655e+03	9.762100000000000364e+03	4.888489999999999782e+03	1.750084999999999854e+04	4.888489999999999782e+03	1.668588000000000102e+04	4.575710000000000036e+03	1.104181999999999971e+04	1.696325000000000000e+04	1.522277000000000044e+04	1.494051000000000022e+04	7.262130000000000109e+03	4.588220000000000255e+03	4.646159999999999854e+03	9.103440000000000509e+03
1.677215000000000146e+04	1.370850000000000000e+04	9.281979999999999563e+03	6.476390000000000327e+03	1.023579000000000087e+04	4.530890000000000327e+03	3.664519999999999982e+03	1.456570999999999913e+04	1.182251000000000022e+04	3.796000000000000000e+03	5.055819999999999709e+03	1.301831999999999971e+04	8.929500000000000000e+03	9.593350000000000364e+03	5.120590000000000146e+03	1.217564999999999964e+04	1.314614999999999964e+04	1.219962000000000080e+04	1.635930000000000064e+03	1.505271999999999935e+04	5.910880000000000109e+03	1.020247999999999956e+04	2.647179999999999836e+03	9.247670000000000073e+03	1.980740000000000009e+03	1.902470000000000027e+03	3.427829999999999927e+03	1.478580999999999949e+04	9.999030000000000655e+03	5.906380000000000109e+03	5.026149999999999636e+03	4.066800000000000182e+03	5.086369999999999891e+03	1.649319999999999936e+03	3.368730000000000018e+03	6.860550000000000182e+03	7.836939999999999600e+03	2.206840000000000146e+03	1.556246999999999935e+04	2.206840000000000146e+03	1.479431999999999971e+04	1.902470000000000027e+03	9.854420000000000073e+03	1.505271999999999935e+04	1.340995000000000073e+04	1.314614999999999964e+04	5.086369999999999891e+03	1.974700000000000045e+03	2.108719999999999800e+03	7.857239999999999782e+03
1.245713999999999942e+04	1.043492000000000007e+04	1.007772999999999956e+04	1.004246999999999935e+04	1.033070999999999913e+04	1.340820999999999913e+04	1.236862999999999920e+04	1.073312000000000080e+04	1.060100000000000000e+04	1.129972999999999956e+04	1.029480999999999949e+04	1.067557999999999993e+04	1.000811000000000058e+04	1.833218000000000029e+04	1.026535000000000036e+04	1.056961000000000058e+04	1.821999000000000160e+04	1.742147999999999956e+04	1.051662999999999920e+04	2.033245000000000073e+04	1.250264999999999964e+04	1.562640999999999985e+04	1.093998999999999978e+04	1.494536000000000058e+04	1.066479999999999927e+04	1.063226000000000022e+04	1.129944000000000051e+04	2.003449000000000160e+04	1.548715999999999985e+04	1.248330999999999949e+04	1.190612000000000080e+04	1.134505999999999949e+04	1.196310000000000036e+04	1.040422999999999956e+04	1.097128000000000065e+04	1.309619000000000051e+04	1.376537000000000080e+04	1.046728000000000065e+04	2.089508000000000175e+04	1.046728000000000065e+04	2.003434000000000015e+04	1.063226000000000022e+04	1.615148999999999978e+04	2.033245000000000073e+04	1.851616999999999825e+04	1.821999000000000160e+04	1.196310000000000036e+04	1.064877000000000044e+04	1.070800000000000000e+04	1.439645999999999913e+04
1.654850000000000000e+04	1.350787000000000080e+04	9.222350000000000364e+03	6.523229999999999563e+03	1.015605999999999949e+04	4.989350000000000364e+03	4.123449999999999818e+03	1.434745999999999913e+04	1.169907999999999993e+04	4.132569999999999709e+03	5.192720000000000255e+03	1.285461000000000058e+04	8.878459999999999127e+03	1.000255999999999949e+04	5.251100000000000364e+03	1.203759000000000015e+04	1.340998999999999978e+04	1.246623999999999978e+04	2.075230000000000018e+03	1.533979000000000087e+04	6.204100000000000364e+03	1.046529000000000087e+04	2.917760000000000218e+03	9.519520000000000437e+03	2.341000000000000000e+03	2.277000000000000000e+03	3.636889999999999873e+03	1.506971999999999935e+04	1.026420999999999913e+04	6.198159999999999854e+03	5.327260000000000218e+03	4.384930000000000291e+03	5.388600000000000364e+03	2.104760000000000218e+03	3.704469999999999800e+03	7.140520000000000437e+03	8.107770000000000437e+03	2.598130000000000109e+03	1.585500000000000000e+04	2.598130000000000109e+03	1.507776000000000022e+04	2.277000000000000000e+03	9.985500000000000000e+03	1.533979000000000087e+04	1.367750000000000000e+04	1.340998999999999978e+04	5.388600000000000364e+03	2.331539999999999964e+03	2.444980000000000018e+03	7.986890000000000327e+03
1.622025000000000000e+04	1.594123999999999978e+04	1.818127000000000044e+04	1.899868000000000029e+04	1.806284999999999854e+04	2.250006999999999971e+04	2.156647000000000116e+04	1.561880999999999949e+04	1.754452999999999884e+04	2.060243999999999869e+04	1.949584000000000015e+04	1.683931000000000131e+04	1.823950999999999840e+04	2.703011999999999898e+04	1.945738999999999942e+04	1.727968999999999869e+04	2.693618999999999869e+04	2.622052000000000044e+04	1.955365999999999985e+04	2.902741999999999825e+04	2.175452000000000044e+04	2.456440000000000146e+04	1.966579000000000087e+04	2.397690999999999985e+04	1.957065999999999985e+04	1.956152000000000044e+04	1.982349000000000160e+04	2.873043999999999869e+04	2.444722999999999956e+04	2.173427999999999884e+04	2.119075999999999840e+04	2.064777000000000044e+04	2.124668000000000029e+04	1.956450000000000000e+04	2.027054000000000087e+04	2.229147999999999956e+04	2.289000000000000000e+04	1.971579000000000087e+04	2.958729999999999927e+04	1.971579000000000087e+04	2.872736000000000058e+04	1.956152000000000044e+04	2.323663000000000102e+04	2.902741999999999825e+04	2.722913000000000102e+04	2.693618999999999869e+04	2.124668000000000029e+04	1.955102000000000044e+04	1.957411000000000058e+04	2.186443000000000029e+04
1.732995000000000073e+04	1.749859999999999854e+04	2.029636000000000058e+04	2.135813999999999942e+04	2.008377999999999884e+04	2.516954000000000087e+04	2.421045999999999913e+04	1.704375000000000000e+04	1.938306999999999971e+04	2.317388999999999942e+04	2.195909999999999854e+04	1.851408000000000175e+04	2.038786999999999898e+04	2.973813999999999942e+04	2.191579999999999927e+04	1.907002000000000044e+04	2.915034000000000015e+04	2.847088999999999942e+04	2.222829999999999927e+04	3.122197999999999956e+04	2.424397999999999956e+04	2.688004000000000087e+04	2.236768000000000029e+04	2.633613999999999942e+04	2.226009000000000015e+04	2.224875000000000000e+04	2.253270000000000073e+04	3.092693000000000029e+04	2.677279999999999927e+04	2.422309000000000015e+04	2.371247999999999956e+04	2.320515999999999985e+04	2.376704999999999927e+04	2.221674000000000160e+04	2.285284000000000015e+04	2.474093000000000029e+04	2.529845999999999913e+04	2.233936999999999898e+04	3.177797000000000116e+04	2.233936999999999898e+04	3.092272999999999956e+04	2.224875000000000000e+04	2.589333000000000175e+04	3.122197999999999956e+04	2.944036999999999898e+04	2.915034000000000015e+04	2.376704999999999927e+04	2.224074000000000160e+04	2.226690999999999985e+04	2.454970000000000073e+04
1.400152000000000044e+04	1.322637999999999920e+04	1.492834000000000015e+04	1.560880999999999949e+04	1.488153000000000065e+04	1.921729999999999927e+04	1.823829000000000087e+04	1.305572999999999956e+04	1.452462999999999920e+04	1.720954000000000087e+04	1.608313999999999942e+04	1.398675000000000000e+04	1.496329000000000087e+04	2.390504999999999927e+04	1.604504000000000087e+04	1.430785000000000036e+04	2.360079000000000087e+04	2.286808000000000175e+04	1.628545000000000073e+04	2.569968999999999869e+04	1.834152999999999884e+04	2.118545000000000073e+04	1.650361000000000058e+04	2.058322000000000116e+04	1.634820999999999913e+04	1.633105999999999949e+04	1.672736000000000058e+04	2.540204999999999927e+04	2.106463999999999942e+04	1.832127000000000044e+04	1.778140999999999985e+04	1.724858000000000175e+04	1.783709000000000015e+04	1.624980999999999949e+04	1.688350000000000000e+04	1.887952999999999884e+04	1.948409000000000015e+04	1.636229999999999927e+04	2.626099000000000160e+04	1.636229999999999927e+04	2.539956999999999971e+04	1.633105999999999949e+04	2.063570999999999913e+04	2.569968999999999869e+04	2.389486999999999898e+04	2.360079000000000087e+04	1.783709000000000015e+04	1.632971999999999935e+04	1.636510000000000036e+04	1.912395999999999913e+04
1.814331000000000131e+04	1.837743000000000029e+04	2.122009999999999854e+04	2.228077999999999884e+04	2.100340999999999985e+04	2.602477999999999884e+04	2.508036000000000058e+04	1.790604999999999927e+04	2.028995999999999913e+04	2.406904999999999927e+04	2.287322999999999956e+04	1.940545999999999913e+04	2.131256000000000131e+04	3.054627999999999884e+04	2.283049000000000160e+04	1.997275000000000000e+04	3.007584000000000015e+04	2.939661000000000058e+04	2.307968999999999869e+04	3.214713000000000102e+04	2.515502999999999884e+04	2.780481999999999971e+04	2.318984000000000015e+04	2.725922000000000116e+04	2.309850000000000000e+04	2.308938999999999942e+04	2.333770999999999913e+04	3.185211999999999898e+04	2.769727000000000044e+04	2.513422999999999956e+04	2.461831999999999971e+04	2.410372000000000116e+04	2.467313000000000102e+04	2.308224000000000160e+04	2.374509000000000015e+04	2.565700000000000000e+04	2.621836000000000058e+04	2.321797999999999956e+04	3.270302000000000044e+04	2.321797999999999956e+04	3.184788999999999942e+04	2.308938999999999942e+04	2.657304999999999927e+04	3.214713000000000102e+04	3.036583000000000175e+04	3.007584000000000015e+04	2.467313000000000102e+04	2.307884999999999854e+04	2.310163999999999942e+04	2.526533000000000175e+04
2.110020999999999913e+04	1.807768000000000029e+04	1.368245999999999913e+04	1.074313999999999942e+04	1.464917000000000007e+04	4.847460000000000036e+03	5.330380000000000109e+03	1.890554000000000087e+04	1.624718000000000029e+04	7.111479999999999563e+03	9.140989999999999782e+03	1.742756999999999971e+04	1.332315999999999985e+04	7.207970000000000255e+03	9.221280000000000655e+03	1.659784999999999854e+04	1.634219000000000051e+04	1.540078000000000065e+04	3.682780000000000200e+03	1.802349000000000160e+04	9.245100000000000364e+03	1.349447999999999956e+04	2.008069999999999936e+03	1.251627000000000044e+04	2.910340000000000146e+03	3.039110000000000127e+03	1.114440000000000055e+03	1.778849000000000160e+04	1.328254999999999927e+04	9.250360000000000582e+03	8.397889999999999418e+03	7.457010000000000218e+03	8.444239999999999782e+03	4.600380000000000109e+03	6.771060000000000400e+03	1.020646999999999935e+04	1.118189999999999964e+04	5.557930000000000291e+03	1.847602999999999884e+04	5.557930000000000291e+03	1.780070000000000073e+04	3.039110000000000127e+03	5.430750000000000000e+03	1.802349000000000160e+04	1.657227999999999884e+04	1.634219000000000051e+04	8.444239999999999782e+03	2.894269999999999982e+03	2.701260000000000218e+03	3.435750000000000000e+03
2.252527999999999884e+04	1.941950999999999840e+04	1.457237999999999920e+04	1.140637999999999920e+04	1.558677000000000044e+04	3.848969999999999800e+03	4.952119999999999891e+03	2.031261000000000058e+04	1.731602000000000044e+04	7.246140000000000327e+03	9.658200000000000728e+03	1.863397000000000116e+04	1.419352000000000044e+04	4.655489999999999782e+03	9.749760000000000218e+03	1.771631000000000131e+04	1.575336000000000058e+04	1.484422999999999956e+04	4.467279999999999745e+03	1.722936000000000058e+04	9.125860000000000582e+03	1.307627000000000044e+04	3.236190000000000055e+03	1.212529999999999927e+04	3.869570000000000164e+03	3.967739999999999782e+03	2.738230000000000018e+03	1.702218999999999869e+04	1.286703000000000065e+04	9.137590000000000146e+03	8.393030000000000655e+03	7.586850000000000364e+03	8.424409999999999854e+03	5.241039999999999964e+03	7.020590000000000146e+03	1.001454000000000087e+04	1.092217000000000007e+04	6.051229999999999563e+03	1.763220000000000073e+04	6.051229999999999563e+03	1.703670000000000073e+04	3.967739999999999782e+03	5.207050000000000182e+03	1.722936000000000058e+04	1.595204999999999927e+04	1.575336000000000058e+04	8.424409999999999854e+03	3.871260000000000218e+03	3.723230000000000018e+03	3.628789999999999964e+03
2.279658000000000175e+04	1.968215000000000146e+04	1.477996999999999935e+04	1.159163999999999942e+04	1.579888999999999942e+04	3.860320000000000164e+03	5.044479999999999563e+03	2.058329000000000087e+04	1.754354000000000087e+04	7.382380000000000109e+03	9.831100000000000364e+03	1.887884000000000015e+04	1.439926000000000022e+04	4.252939999999999600e+03	9.923750000000000000e+03	1.795016999999999825e+04	1.573031999999999971e+04	1.482884000000000015e+04	4.735390000000000327e+03	1.716861000000000058e+04	9.206540000000000873e+03	1.308912999999999920e+04	3.582170000000000073e+03	1.214618000000000029e+04	4.171920000000000073e+03	4.264239999999999782e+03	3.125010000000000218e+03	1.696658000000000175e+04	1.288106999999999971e+04	9.219209999999999127e+03	8.497180000000000291e+03	7.718829999999999927e+03	8.525979999999999563e+03	5.475869999999999891e+03	7.176289999999999964e+03	1.007795000000000073e+04	1.096978000000000065e+04	6.253659999999999854e+03	1.756225000000000000e+04	6.253659999999999854e+03	1.698143999999999869e+04	4.264239999999999782e+03	5.251460000000000036e+03	1.716861000000000058e+04	1.592329999999999927e+04	1.573031999999999971e+04	8.525979999999999563e+03	4.175380000000000109e+03	4.035989999999999782e+03	3.788849999999999909e+03
1.855452000000000044e+04	1.612180999999999949e+04	1.389835000000000036e+04	1.229430999999999949e+04	1.454062999999999920e+04	1.119571999999999935e+04	1.079873999999999978e+04	1.662540000000000146e+04	1.546419000000000051e+04	1.106629999999999927e+04	1.154725000000000000e+04	1.602339999999999964e+04	1.366972999999999956e+04	1.468732999999999993e+04	1.157379999999999927e+04	1.560064999999999964e+04	2.006758000000000175e+04	1.914447999999999956e+04	8.439190000000000509e+03	2.207868999999999869e+04	1.304304000000000087e+04	1.715102999999999884e+04	7.807159999999999854e+03	1.625078000000000065e+04	8.095069999999999709e+03	8.144489999999999782e+03	7.640439999999999600e+03	2.179775000000000000e+04	1.696159000000000015e+04	1.303375000000000000e+04	1.219570000000000073e+04	1.129412000000000080e+04	1.225844000000000051e+04	8.910930000000000291e+03	1.064029999999999927e+04	1.393101000000000022e+04	1.485540999999999985e+04	9.547690000000000509e+03	2.261231000000000131e+04	9.547690000000000509e+03	2.180384000000000015e+04	8.144489999999999782e+03	1.046614999999999964e+04	2.207868999999999869e+04	2.034845000000000073e+04	2.006758000000000175e+04	1.225844000000000051e+04	8.069680000000000291e+03	8.006239999999999782e+03	9.034000000000000000e+03
2.309295000000000073e+04	1.997027000000000044e+04	1.501322999999999956e+04	1.180437999999999920e+04	1.603626000000000022e+04	3.922170000000000073e+03	5.179479999999999563e+03	2.087947999999999956e+04	1.779606000000000131e+04	7.552130000000000109e+03	1.003334000000000015e+04	1.914883000000000175e+04	1.463084000000000015e+04	3.824210000000000036e+03	1.012696999999999935e+04	1.820909000000000015e+04	1.572021999999999935e+04	1.482762999999999920e+04	5.044359999999999673e+03	1.711706000000000131e+04	9.314440000000000509e+03	1.311971999999999935e+04	3.965829999999999927e+03	1.218636000000000058e+04	4.514819999999999709e+03	4.601439999999999600e+03	3.543849999999999909e+03	1.692065999999999985e+04	1.291312999999999920e+04	9.328069999999999709e+03	8.631040000000000873e+03	7.883310000000000400e+03	8.657110000000000582e+03	5.750210000000000036e+03	7.366470000000000255e+03	1.016611000000000058e+04	1.103987999999999920e+04	6.493560000000000400e+03	1.750054000000000087e+04	6.493560000000000400e+03	1.693590000000000146e+04	4.601439999999999600e+03	5.329859999999999673e+03	1.711706000000000131e+04	1.590694000000000051e+04	1.572021999999999935e+04	8.657110000000000582e+03	4.519859999999999673e+03	4.388819999999999709e+03	3.996010000000000218e+03
2.375186000000000058e+04	2.062536000000000058e+04	1.563561000000000058e+04	1.241340999999999985e+04	1.666118999999999869e+04	4.423079999999999927e+03	5.738229999999999563e+03	2.153847999999999956e+04	1.843072000000000116e+04	8.132319999999999709e+03	1.063586000000000058e+04	1.979406000000000131e+04	1.525219000000000051e+04	3.358449999999999818e+03	1.073014999999999964e+04	1.884775999999999840e+04	1.609517000000000007e+04	1.521495999999999913e+04	5.712609999999999673e+03	1.743540999999999985e+04	9.834209999999999127e+03	1.354827000000000044e+04	4.638539999999999964e+03	1.262762999999999920e+04	5.190810000000000400e+03	5.276670000000000073e+03	4.189899999999999636e+03	1.724693999999999869e+04	1.334372999999999956e+04	9.848760000000000218e+03	9.177270000000000437e+03	8.458370000000000800e+03	9.200729999999999563e+03	6.403670000000000073e+03	7.963460000000000036e+03	1.066401000000000022e+04	1.151682999999999993e+04	7.126890000000000327e+03	1.780441999999999825e+04	7.126890000000000327e+03	1.726268000000000029e+04	5.276670000000000073e+03	5.132430000000000291e+03	1.743540999999999985e+04	1.627362000000000080e+04	1.609517000000000007e+04	9.200729999999999563e+03	5.196010000000000218e+03	5.065520000000000437e+03	4.030619999999999891e+03
2.228386000000000058e+04	1.918945000000000073e+04	1.441015999999999985e+04	1.127323999999999978e+04	1.541854999999999927e+04	3.939079999999999927e+03	4.944760000000000218e+03	2.007252999999999884e+04	1.712872999999999956e+04	7.177960000000000036e+03	9.541989999999999782e+03	1.842550999999999840e+04	1.403375000000000000e+04	5.090800000000000182e+03	9.632139999999999418e+03	1.752131999999999971e+04	1.584479999999999927e+04	1.492834000000000015e+04	4.252729999999999563e+03	1.735893999999999869e+04	9.114680000000000291e+03	1.313222999999999956e+04	2.920739999999999782e+03	1.217381999999999971e+04	3.613139999999999873e+03	3.718659999999999854e+03	2.356559999999999945e+03	1.714661999999999898e+04	1.292195999999999913e+04	9.125360000000000582e+03	8.357620000000000800e+03	7.522409999999999854e+03	8.391790000000000873e+03	5.064329999999999927e+03	6.930840000000000146e+03	1.002046999999999935e+04	1.094370000000000073e+04	5.910250000000000000e+03	1.777100999999999840e+04	5.910250000000000000e+03	1.716074000000000160e+04	3.718659999999999854e+03	5.138489999999999782e+03	1.735893999999999869e+04	1.604929999999999927e+04	1.584479999999999927e+04	8.391790000000000873e+03	3.612360000000000127e+03	3.453280000000000200e+03	3.448360000000000127e+03
1.901656999999999971e+04	1.635015999999999985e+04	1.338839999999999964e+04	1.133895999999999913e+04	1.414807999999999993e+04	9.143139999999999418e+03	8.878780000000000655e+03	1.696938000000000102e+04	1.530387999999999920e+04	9.454729999999999563e+03	1.032898999999999978e+04	1.607193000000000029e+04	1.311327000000000044e+04	1.248670999999999913e+04	1.037071999999999935e+04	1.551072999999999956e+04	1.872316999999999825e+04	1.778338000000000102e+04	6.517460000000000036e+03	2.067220999999999913e+04	1.154186000000000058e+04	1.578089999999999964e+04	5.700800000000000182e+03	1.484462000000000080e+04	6.082479999999999563e+03	6.146770000000000437e+03	5.468109999999999673e+03	2.040022999999999956e+04	1.558248999999999978e+04	1.153568000000000029e+04	1.066555999999999949e+04	9.718750000000000000e+03	1.072685000000000036e+04	7.102880000000000109e+03	9.027049999999999272e+03	1.247339999999999964e+04	1.343388999999999942e+04	7.846539999999999964e+03	2.119013000000000102e+04	7.846539999999999964e+03	2.040793999999999869e+04	6.146770000000000437e+03	8.638090000000000146e+03	2.067220999999999913e+04	1.899450999999999840e+04	1.872316999999999825e+04	1.072685000000000036e+04	6.056409999999999854e+03	5.970840000000000146e+03	7.043560000000000400e+03
2.358652000000000044e+04	2.046004000000000087e+04	1.547245000000000073e+04	1.225160000000000036e+04	1.649779000000000087e+04	4.274899999999999636e+03	5.582180000000000291e+03	2.137313000000000102e+04	1.826647000000000116e+04	7.973810000000000400e+03	1.047473999999999978e+04	1.962909999999999854e+04	1.508912000000000080e+04	3.434340000000000146e+03	1.056895000000000073e+04	1.868320999999999913e+04	1.597265999999999985e+04	1.508994000000000051e+04	5.547859999999999673e+03	1.732434000000000015e+04	9.684829999999999927e+03	1.341526000000000022e+04	4.482680000000000291e+03	1.249217000000000007e+04	5.028489999999999782e+03	5.113789999999999964e+03	4.046440000000000055e+03	1.713424000000000160e+04	1.321031999999999971e+04	9.699239999999999782e+03	9.023690000000000509e+03	8.300579999999999927e+03	9.047549999999999272e+03	6.238340000000000146e+03	7.802829999999999927e+03	1.051834000000000015e+04	1.137486000000000058e+04	6.962560000000000400e+03	1.769634999999999854e+04	6.962560000000000400e+03	1.714988000000000102e+04	5.113789999999999964e+03	5.208930000000000291e+03	1.732434000000000015e+04	1.615275000000000000e+04	1.597265999999999985e+04	9.047549999999999272e+03	5.033859999999999673e+03	4.904350000000000364e+03	4.050130000000000109e+03
1.955297999999999956e+04	1.670899000000000160e+04	1.310312999999999920e+04	1.065345000000000073e+04	1.396078000000000065e+04	7.221840000000000146e+03	7.131380000000000109e+03	1.742472999999999956e+04	1.531700000000000000e+04	8.082170000000000073e+03	9.388899999999999636e+03	1.626842000000000007e+04	1.278854000000000087e+04	1.040929999999999927e+04	9.446270000000000437e+03	1.558686000000000058e+04	1.750236999999999898e+04	1.655370000000000073e+04	4.830619999999999891e+03	1.937265000000000146e+04	1.024767000000000007e+04	1.456315999999999985e+04	3.748119999999999891e+03	1.360021999999999935e+04	4.271340000000000146e+03	4.356960000000000036e+03	3.413250000000000000e+03	1.911170000000000073e+04	1.435761000000000058e+04	1.024517000000000007e+04	9.357860000000000582e+03	8.382469999999999345e+03	9.415950000000000728e+03	5.556960000000000036e+03	7.665609999999999673e+03	1.120997999999999956e+04	1.219369000000000051e+04	6.415380000000000109e+03	1.987118000000000029e+04	6.415380000000000109e+03	1.912102000000000044e+04	4.356960000000000036e+03	7.199600000000000364e+03	1.937265000000000146e+04	1.776154999999999927e+04	1.750236999999999898e+04	9.415950000000000728e+03	4.245069999999999709e+03	4.126850000000000364e+03	5.396930000000000291e+03
1.867127000000000044e+04	1.654009000000000015e+04	1.510094000000000051e+04	1.391671999999999935e+04	1.562003000000000065e+04	1.356570000000000073e+04	1.310540999999999985e+04	1.690772999999999956e+04	1.629875000000000000e+04	1.318861000000000058e+04	1.338885000000000036e+04	1.663393999999999869e+04	1.491975000000000000e+04	1.707181000000000131e+04	1.340357999999999993e+04	1.636177000000000044e+04	2.191775000000000000e+04	2.101400000000000000e+04	1.076057999999999993e+04	2.396886999999999898e+04	1.506914999999999964e+04	1.904188999999999942e+04	1.020267000000000007e+04	1.817690999999999985e+04	1.045757999999999993e+04	1.050080999999999949e+04	1.004728000000000065e+04	2.368195000000000073e+04	1.886099000000000160e+04	1.505777000000000044e+04	1.425113999999999942e+04	1.339027000000000044e+04	1.431418000000000029e+04	1.117194000000000051e+04	1.276867000000000007e+04	1.591672999999999956e+04	1.680543999999999869e+04	1.174254000000000087e+04	2.451288999999999942e+04	1.174254000000000087e+04	2.368668000000000029e+04	1.050080999999999949e+04	1.244492000000000007e+04	2.396886999999999898e+04	2.220475000000000000e+04	2.191775000000000000e+04	1.431418000000000029e+04	1.043256999999999971e+04	1.037787000000000080e+04	1.118242000000000007e+04
1.876290000000000146e+04	1.639322000000000116e+04	1.432828000000000065e+04	1.279873999999999978e+04	1.494747999999999956e+04	1.176920999999999913e+04	1.137998999999999978e+04	1.686775000000000000e+04	1.582301000000000022e+04	1.163995000000000073e+04	1.208605999999999949e+04	1.633615999999999985e+04	1.410843000000000029e+04	1.519656999999999971e+04	1.211086000000000058e+04	1.594445999999999913e+04	2.061243000000000029e+04	1.969165999999999985e+04	9.019930000000000291e+03	2.262943000000000029e+04	1.360751000000000022e+04	1.770034999999999854e+04	8.371329999999999927e+03	1.680438000000000102e+04	8.670959999999999127e+03	8.721510000000000218e+03	8.185560000000000400e+03	2.234765000000000146e+04	1.751197000000000116e+04	1.359797999999999956e+04	1.276307999999999993e+04	1.186536000000000058e+04	1.282587999999999920e+04	9.492620000000000800e+03	1.121435000000000036e+04	1.449110000000000036e+04	1.541147999999999956e+04	1.012657999999999993e+04	2.316452000000000044e+04	1.012657999999999993e+04	2.235356000000000131e+04	8.721510000000000218e+03	1.077456999999999971e+04	2.262943000000000029e+04	2.089422999999999956e+04	2.061243000000000029e+04	1.282587999999999920e+04	8.645510000000000218e+03	8.580090000000000146e+03	9.410319999999999709e+03
1.985275000000000000e+04	1.856002000000000044e+04	1.883591999999999825e+04	1.849170000000000073e+04	1.908333000000000175e+04	1.946406999999999971e+04	1.888663999999999942e+04	1.859661999999999898e+04	1.922384999999999854e+04	1.865054999999999927e+04	1.836824000000000160e+04	1.906465999999999985e+04	1.875625999999999840e+04	2.307100999999999840e+04	1.836215000000000146e+04	1.912997000000000116e+04	2.670072000000000116e+04	2.585197000000000116e+04	1.658815000000000146e+04	2.880315000000000146e+04	2.032363000000000102e+04	2.395929999999999927e+04	1.616450000000000000e+04	2.318015999999999985e+04	1.635631999999999971e+04	1.638861000000000058e+04	1.604554999999999927e+04	2.850775000000000000e+04	2.379870000000000073e+04	2.030872999999999956e+04	1.957541999999999825e+04	1.880356000000000131e+04	1.963761999999999898e+04	1.689734000000000015e+04	1.824943999999999869e+04	2.107947999999999956e+04	2.188270999999999913e+04	1.735250999999999840e+04	2.936170999999999913e+04	1.735250999999999840e+04	2.850958000000000175e+04	1.638861000000000058e+04	1.798791999999999825e+04	2.880315000000000146e+04	2.699543999999999869e+04	2.670072000000000116e+04	1.963761999999999898e+04	1.633212000000000080e+04	1.629307999999999993e+04	1.695297999999999956e+04
1.909729999999999927e+04	1.639552999999999884e+04	1.331287999999999920e+04	1.118930999999999949e+04	1.409129999999999927e+04	8.790829999999999927e+03	8.552120000000000800e+03	1.703322000000000116e+04	1.528486000000000058e+04	9.186969999999999345e+03	1.013377000000000044e+04	1.608722999999999956e+04	1.303025000000000000e+04	1.211176000000000022e+04	1.017822999999999956e+04	1.550339999999999964e+04	1.849116999999999825e+04	1.754925999999999840e+04	6.195000000000000000e+03	2.042781999999999971e+04	1.129054999999999927e+04	1.554725000000000000e+04	5.341010000000000218e+03	1.460562000000000080e+04	5.741819999999999709e+03	5.809140000000000327e+03	5.095550000000000182e+03	2.015759000000000015e+04	1.534745999999999913e+04	1.128495999999999913e+04	1.041059000000000015e+04	9.457329999999999927e+03	1.047146999999999935e+04	6.802460000000000036e+03	8.760079999999999927e+03	1.222850000000000000e+04	1.319406999999999971e+04	7.565600000000000364e+03	2.094265999999999985e+04	7.565600000000000364e+03	2.016558000000000175e+04	5.809140000000000327e+03	8.358870000000000800e+03	2.042781999999999971e+04	1.876061000000000058e+04	1.849116999999999825e+04	1.047146999999999935e+04	5.715670000000000073e+03	5.625569999999999709e+03	6.728890000000000327e+03
2.373970999999999913e+04	2.061272000000000116e+04	1.561995000000000073e+04	1.239688999999999942e+04	1.664570000000000073e+04	4.402449999999999818e+03	5.719460000000000036e+03	2.152634999999999854e+04	1.841599000000000160e+04	8.114340000000000146e+03	1.061898999999999978e+04	1.978031000000000131e+04	1.523645000000000073e+04	3.344179999999999836e+03	1.071330999999999949e+04	1.883338000000000102e+04	1.607132999999999993e+04	1.519129999999999927e+04	5.702239999999999782e+03	1.741088999999999942e+04	9.813739999999999782e+03	1.352536000000000058e+04	4.634199999999999818e+03	1.260500000000000000e+04	5.182909999999999854e+03	5.268329999999999927e+03	4.189989999999999782e+03	1.722249000000000160e+04	1.332087000000000080e+04	9.828319999999999709e+03	9.157770000000000437e+03	8.440129999999999200e+03	9.181129999999999200e+03	6.391060000000000400e+03	7.946369999999999891e+03	1.064282999999999993e+04	1.149505999999999949e+04	7.112279999999999745e+03	1.777977000000000044e+04	7.112279999999999745e+03	1.723824000000000160e+04	5.268329999999999927e+03	5.157590000000000146e+03	1.741088999999999942e+04	1.624965999999999985e+04	1.607132999999999993e+04	9.181129999999999200e+03	5.188229999999999563e+03	5.058409999999999854e+03	4.053710000000000036e+03
1.962675999999999840e+04	1.824113999999999942e+04	1.835334000000000015e+04	1.793386999999999898e+04	1.862661000000000058e+04	1.879945999999999913e+04	1.823079999999999927e+04	1.831165999999999985e+04	1.881859000000000015e+04	1.801959000000000015e+04	1.777611000000000058e+04	1.870700000000000000e+04	1.826420000000000073e+04	2.239984000000000015e+04	1.777172999999999956e+04	1.873950999999999840e+04	2.613668000000000029e+04	2.528202999999999884e+04	1.592796999999999935e+04	2.823616999999999825e+04	1.971131999999999971e+04	2.338020000000000073e+04	1.549492000000000007e+04	2.259258000000000175e+04	1.569104999999999927e+04	1.572411000000000058e+04	1.537370999999999913e+04	2.794131999999999971e+04	2.321761000000000058e+04	1.969668999999999869e+04	1.895652000000000044e+04	1.817663000000000102e+04	1.901884999999999854e+04	1.624475000000000000e+04	1.761659999999999854e+04	2.047574000000000160e+04	2.128722000000000116e+04	1.670888000000000102e+04	2.879379999999999927e+04	1.670888000000000102e+04	2.794343000000000029e+04	1.572411000000000058e+04	1.735488999999999942e+04	2.823616999999999825e+04	2.643095999999999913e+04	2.613668000000000029e+04	1.901884999999999854e+04	1.566678000000000065e+04	1.562664999999999964e+04	1.630057999999999993e+04
2.019697999999999956e+04	1.726890999999999985e+04	1.330879000000000087e+04	1.063045999999999913e+04	1.421823999999999978e+04	6.183649999999999636e+03	6.295659999999999854e+03	1.803479000000000087e+04	1.568442000000000007e+04	7.584680000000000291e+03	9.208420000000000073e+03	1.673738999999999942e+04	1.297298999999999978e+04	9.085489999999999782e+03	9.276170000000000073e+03	1.598989999999999964e+04	1.701093000000000029e+04	1.606138999999999942e+04	4.149140000000000327e+03	1.881068000000000029e+04	9.770840000000000146e+03	1.409518000000000029e+04	2.763610000000000127e+03	1.312022999999999956e+04	3.469300000000000182e+03	3.577809999999999945e+03	2.230590000000000146e+03	1.855950000000000000e+04	1.388587000000000080e+04	9.771409999999999854e+03	8.886350000000000364e+03	7.908760000000000218e+03	8.940579999999999927e+03	4.988760000000000218e+03	7.189630000000000109e+03	1.074320999999999913e+04	1.173247999999999956e+04	5.919989999999999782e+03	1.929193999999999869e+04	5.919989999999999782e+03	1.857002000000000044e+04	3.577809999999999945e+03	6.286069999999999709e+03	1.881068000000000029e+04	1.725925999999999840e+04	1.701093000000000029e+04	8.940579999999999927e+03	3.444480000000000018e+03	3.288679999999999836e+03	4.369619999999999891e+03
2.226131999999999971e+04	1.916641999999999825e+04	1.438486000000000058e+04	1.124721999999999935e+04	1.539342000000000007e+04	3.912489999999999782e+03	4.917390000000000327e+03	2.004993000000000029e+04	1.710415999999999985e+04	7.150890000000000327e+03	9.515620000000000800e+03	1.840165999999999985e+04	1.400837999999999920e+04	5.090189999999999600e+03	9.605790000000000873e+03	1.749700999999999840e+04	1.581796999999999935e+04	1.490143000000000029e+04	4.228659999999999854e+03	1.733270999999999913e+04	9.087309999999999491e+03	1.310505999999999949e+04	2.901420000000000073e+03	1.214660000000000036e+04	3.590659999999999854e+03	3.695880000000000109e+03	2.343050000000000182e+03	1.712029999999999927e+04	1.289478000000000065e+04	9.097989999999999782e+03	8.330329999999999927e+03	7.495319999999999709e+03	8.364489999999999782e+03	5.039159999999999854e+03	6.904020000000000437e+03	9.993100000000000364e+03	1.091635000000000036e+04	5.884260000000000218e+03	1.774495999999999913e+04	5.884260000000000218e+03	1.713440999999999985e+04	3.695880000000000109e+03	5.165750000000000000e+03	1.733270999999999913e+04	1.602254999999999927e+04	1.581796999999999935e+04	8.364489999999999782e+03	3.590000000000000000e+03	3.431429999999999836e+03	3.474110000000000127e+03
1.891600999999999840e+04	1.717197000000000116e+04	1.660331999999999971e+04	1.586462000000000080e+04	1.698365000000000146e+04	1.626996999999999935e+04	1.573788999999999942e+04	1.737918999999999869e+04	1.738888000000000102e+04	1.563344000000000051e+04	1.555903000000000065e+04	1.747463999999999942e+04	1.647459999999999854e+04	1.985093000000000029e+04	1.556211000000000058e+04	1.737175999999999840e+04	2.401522999999999956e+04	2.313809000000000015e+04	1.341823999999999978e+04	2.609879000000000087e+04	1.740183000000000175e+04	2.120245000000000073e+04	1.294640999999999985e+04	2.038115999999999985e+04	1.315987999999999920e+04	1.319613999999999942e+04	1.281752000000000044e+04	2.580670999999999913e+04	2.103191999999999825e+04	1.738841999999999825e+04	1.662047000000000116e+04	1.580763999999999942e+04	1.668325000000000000e+04	1.376745999999999913e+04	1.522311000000000058e+04	1.820104000000000087e+04	1.904554999999999927e+04	1.427001000000000022e+04	2.665170999999999913e+04	1.427001000000000022e+04	2.580993000000000029e+04	1.319613999999999942e+04	1.499611000000000058e+04	2.609879000000000087e+04	2.430713000000000102e+04	2.401522999999999956e+04	1.668325000000000000e+04	1.313537000000000080e+04	1.309073999999999978e+04	1.384959000000000015e+04
2.258284999999999854e+04	1.947609000000000015e+04	1.462229999999999927e+04	1.145329999999999927e+04	1.563728000000000065e+04	3.869170000000000073e+03	4.985159999999999854e+03	2.037009000000000015e+04	1.736845999999999913e+04	7.286039999999999964e+03	9.703370000000000800e+03	1.868850999999999840e+04	1.424319000000000051e+04	4.596039999999999964e+03	9.795090000000000146e+03	1.776952000000000044e+04	1.577032999999999993e+04	1.486235000000000036e+04	4.523689999999999600e+03	1.724034000000000015e+04	9.158090000000000146e+03	1.309869000000000051e+04	3.300360000000000127e+03	1.214887999999999920e+04	3.929679999999999836e+03	4.027239999999999782e+03	2.804550000000000182e+03	1.703400000000000000e+04	1.288961000000000058e+04	9.169959999999999127e+03	8.428559999999999491e+03	7.626210000000000036e+03	8.459579999999999927e+03	5.293600000000000364e+03	7.063130000000000109e+03	1.004432999999999993e+04	1.094970000000000073e+04	6.099829999999999927e+03	1.764168999999999869e+04	6.099829999999999927e+03	1.704856000000000131e+04	4.027239999999999782e+03	5.190699999999999818e+03	1.724034000000000015e+04	1.596812000000000080e+04	1.577032999999999993e+04	8.459579999999999927e+03	3.931559999999999945e+03	3.784400000000000091e+03	3.631250000000000000e+03
1.938593000000000029e+04	1.787259999999999854e+04	1.774872000000000116e+04	1.721763999999999942e+04	1.805952000000000044e+04	1.791502999999999884e+04	1.736150000000000000e+04	1.799084999999999854e+04	1.832583000000000175e+04	1.719065999999999985e+04	1.700777999999999884e+04	1.828261000000000058e+04	1.764572000000000116e+04	2.149911000000000058e+04	1.700604000000000087e+04	1.826813999999999942e+04	2.540675000000000000e+04	2.454368000000000029e+04	1.505161000000000058e+04	2.750122000000000116e+04	1.891095999999999913e+04	2.262890000000000146e+04	1.460134000000000015e+04	2.182883000000000175e+04	1.480568000000000029e+04	1.484012999999999920e+04	1.447488999999999942e+04	2.720727999999999884e+04	2.246338999999999942e+04	1.889677000000000044e+04	1.814622000000000116e+04	1.735404000000000087e+04	1.820874000000000160e+04	1.538121999999999935e+04	1.678483000000000175e+04	1.968827999999999884e+04	2.051202000000000044e+04	1.586002000000000044e+04	2.805731000000000131e+04	1.586002000000000044e+04	2.720979000000000087e+04	1.484012999999999920e+04	1.650061000000000058e+04	2.750122000000000116e+04	2.570027999999999884e+04	2.540675000000000000e+04	1.820874000000000160e+04	1.478129999999999927e+04	1.473917000000000007e+04	1.542128000000000065e+04
1.867743999999999869e+04	1.611237000000000080e+04	1.349198999999999978e+04	1.165761000000000058e+04	1.419697999999999956e+04	1.005956999999999971e+04	9.714079999999999927e+03	1.668002999999999884e+04	1.524488999999999942e+04	1.011493000000000029e+04	1.078002000000000044e+04	1.591671999999999935e+04	1.323872999999999956e+04	1.351520000000000073e+04	1.081393000000000029e+04	1.541902000000000044e+04	1.925597000000000116e+04	1.832384999999999854e+04	7.349310000000000400e+03	2.123897000000000116e+04	1.214676000000000022e+04	1.632360000000000036e+04	6.649619999999999891e+03	1.540487000000000080e+04	6.970000000000000000e+03	7.024979999999999563e+03	6.465310000000000400e+03	2.096211999999999898e+04	1.612960000000000036e+04	1.213888999999999942e+04	1.128414999999999964e+04	1.035967000000000007e+04	1.134637000000000080e+04	7.868289999999999964e+03	9.687000000000000000e+03	1.305685000000000036e+04	1.399995000000000073e+04	8.552389999999999418e+03	2.176545000000000073e+04	8.552389999999999418e+03	2.096899000000000160e+04	7.024979999999999563e+03	9.525280000000000655e+03	2.123897000000000116e+04	1.953252999999999884e+04	1.925597000000000116e+04	1.134637000000000080e+04	6.944319999999999709e+03	6.872810000000000400e+03	8.000119999999999891e+03
1.881199000000000160e+04	1.650811000000000058e+04	1.461635000000000036e+04	1.317875000000000000e+04	1.520865999999999985e+04	1.230973999999999978e+04	1.190810000000000036e+04	1.695261000000000058e+04	1.603037000000000080e+04	1.212911000000000058e+04	1.251401000000000022e+04	1.649395000000000073e+04	1.440685000000000036e+04	1.573255999999999949e+04	1.253620999999999913e+04	1.613554000000000087e+04	2.104650999999999840e+04	2.012963999999999942e+04	9.550209999999999127e+03	2.307268000000000029e+04	1.407689999999999964e+04	1.814224000000000160e+04	8.915770000000000437e+03	1.725356000000000131e+04	9.209459999999999127e+03	9.258790000000000873e+03	8.730719999999999345e+03	2.278954000000000087e+04	1.795563999999999942e+04	1.406690999999999985e+04	1.323837999999999920e+04	1.234898999999999978e+04	1.330128000000000065e+04	1.001040999999999985e+04	1.170456999999999971e+04	1.495218000000000029e+04	1.586523999999999978e+04	1.063053000000000065e+04	2.361011999999999898e+04	1.063053000000000065e+04	2.279515999999999985e+04	9.258790000000000873e+03	1.120261000000000058e+04	2.307268000000000029e+04	2.132970999999999913e+04	2.104650999999999840e+04	1.330128000000000065e+04	9.184069999999999709e+03	9.120329999999999927e+03	9.882520000000000437e+03
2.252527999999999884e+04	1.941950999999999840e+04	1.457237999999999920e+04	1.140637999999999920e+04	1.558677000000000044e+04	3.848969999999999800e+03	4.952119999999999891e+03	2.031261000000000058e+04	1.731602000000000044e+04	7.246140000000000327e+03	9.658200000000000728e+03	1.863397000000000116e+04	1.419352000000000044e+04	4.655489999999999782e+03	9.749760000000000218e+03	1.771631000000000131e+04	1.575336000000000058e+04	1.484422999999999956e+04	4.467279999999999745e+03	1.722936000000000058e+04	9.125860000000000582e+03	1.307627000000000044e+04	3.236190000000000055e+03	1.212529999999999927e+04	3.869570000000000164e+03	3.967739999999999782e+03	2.738230000000000018e+03	1.702218999999999869e+04	1.286703000000000065e+04	9.137590000000000146e+03	8.393030000000000655e+03	7.586850000000000364e+03	8.424409999999999854e+03	5.241039999999999964e+03	7.020590000000000146e+03	1.001454000000000087e+04	1.092217000000000007e+04	6.051229999999999563e+03	1.763220000000000073e+04	6.051229999999999563e+03	1.703670000000000073e+04	3.967739999999999782e+03	5.207050000000000182e+03	1.722936000000000058e+04	1.595204999999999927e+04	1.575336000000000058e+04	8.424409999999999854e+03	3.871260000000000218e+03	3.723230000000000018e+03	3.628789999999999964e+03
2.483502000000000044e+04	2.170493999999999869e+04	1.668002999999999884e+04	1.344398999999999978e+04	1.770820999999999913e+04	5.360710000000000036e+03	6.726369999999999891e+03	2.262181999999999971e+04	1.948849000000000160e+04	9.135479999999999563e+03	1.166051000000000022e+04	2.086336999999999898e+04	1.629554000000000087e+04	2.879440000000000055e+03	1.175545000000000073e+04	1.990997000000000116e+04	1.681031999999999971e+04	1.594959000000000015e+04	6.804640000000000327e+03	1.806615999999999985e+04	1.076032999999999993e+04	1.434426000000000022e+04	5.717699999999999818e+03	1.344335000000000036e+04	6.284229999999999563e+03	6.370560000000000400e+03	5.228140000000000327e+03	1.788961999999999898e+04	1.414305999999999949e+04	1.077600000000000000e+04	1.013779999999999927e+04	9.454850000000000364e+03	1.015802000000000044e+04	7.484789999999999964e+03	8.985870000000000800e+03	1.156001000000000022e+04	1.238321999999999935e+04	8.188850000000000364e+03	1.841324000000000160e+04	8.188850000000000364e+03	1.790606000000000131e+04	6.370560000000000400e+03	4.903859999999999673e+03	1.806615999999999985e+04	1.697658000000000175e+04	1.681031999999999971e+04	1.015802000000000044e+04	6.289250000000000000e+03	6.157340000000000146e+03	4.231789999999999964e+03
1.901656999999999971e+04	1.635015999999999985e+04	1.338839999999999964e+04	1.133895999999999913e+04	1.414807999999999993e+04	9.143139999999999418e+03	8.878780000000000655e+03	1.696938000000000102e+04	1.530387999999999920e+04	9.454729999999999563e+03	1.032898999999999978e+04	1.607193000000000029e+04	1.311327000000000044e+04	1.248670999999999913e+04	1.037071999999999935e+04	1.551072999999999956e+04	1.872316999999999825e+04	1.778338000000000102e+04	6.517460000000000036e+03	2.067220999999999913e+04	1.154186000000000058e+04	1.578089999999999964e+04	5.700800000000000182e+03	1.484462000000000080e+04	6.082479999999999563e+03	6.146770000000000437e+03	5.468109999999999673e+03	2.040022999999999956e+04	1.558248999999999978e+04	1.153568000000000029e+04	1.066555999999999949e+04	9.718750000000000000e+03	1.072685000000000036e+04	7.102880000000000109e+03	9.027049999999999272e+03	1.247339999999999964e+04	1.343388999999999942e+04	7.846539999999999964e+03	2.119013000000000102e+04	7.846539999999999964e+03	2.040793999999999869e+04	6.146770000000000437e+03	8.638090000000000146e+03	2.067220999999999913e+04	1.899450999999999840e+04	1.872316999999999825e+04	1.072685000000000036e+04	6.056409999999999854e+03	5.970840000000000146e+03	7.043560000000000400e+03
1.921422000000000116e+04	1.644665000000000146e+04	1.313381999999999971e+04	1.087072999999999956e+04	1.394714999999999964e+04	8.088020000000000437e+03	7.895750000000000000e+03	1.711956999999999971e+04	1.521209000000000015e+04	8.642579999999999927e+03	9.728899999999999636e+03	1.608007999999999993e+04	1.283720999999999913e+04	1.138773999999999978e+04	9.778549999999999272e+03	1.545305999999999949e+04	1.800347999999999956e+04	1.705824000000000160e+04	5.551029999999999745e+03	1.991563000000000102e+04	1.077385000000000036e+04	1.505886000000000058e+04	4.627649999999999636e+03	1.410800000000000000e+04	5.063399999999999636e+03	5.136409999999999854e+03	4.363109999999999673e+03	1.964884000000000015e+04	1.485662999999999920e+04	1.076940999999999985e+04	9.888420000000000073e+03	8.924659999999999854e+03	9.948379999999999200e+03	6.200310000000000400e+03	8.218260000000000218e+03	1.172263999999999942e+04	1.269657999999999993e+04	6.999670000000000073e+03	2.042445999999999913e+04	6.999670000000000073e+03	1.965734999999999854e+04	5.136409999999999854e+03	7.884130000000000109e+03	1.991563000000000102e+04	1.826911999999999898e+04	1.800347999999999956e+04	9.948379999999999200e+03	5.037130000000000109e+03	4.938520000000000437e+03	6.174960000000000036e+03
2.228386000000000058e+04	1.918945000000000073e+04	1.441015999999999985e+04	1.127323999999999978e+04	1.541854999999999927e+04	3.939079999999999927e+03	4.944760000000000218e+03	2.007252999999999884e+04	1.712872999999999956e+04	7.177960000000000036e+03	9.541989999999999782e+03	1.842550999999999840e+04	1.403375000000000000e+04	5.090800000000000182e+03	9.632139999999999418e+03	1.752131999999999971e+04	1.584479999999999927e+04	1.492834000000000015e+04	4.252729999999999563e+03	1.735893999999999869e+04	9.114680000000000291e+03	1.313222999999999956e+04	2.920739999999999782e+03	1.217381999999999971e+04	3.613139999999999873e+03	3.718659999999999854e+03	2.356559999999999945e+03	1.714661999999999898e+04	1.292195999999999913e+04	9.125360000000000582e+03	8.357620000000000800e+03	7.522409999999999854e+03	8.391790000000000873e+03	5.064329999999999927e+03	6.930840000000000146e+03	1.002046999999999935e+04	1.094370000000000073e+04	5.910250000000000000e+03	1.777100999999999840e+04	5.910250000000000000e+03	1.716074000000000160e+04	3.718659999999999854e+03	5.138489999999999782e+03	1.735893999999999869e+04	1.604929999999999927e+04	1.584479999999999927e+04	8.391790000000000873e+03	3.612360000000000127e+03	3.453280000000000200e+03	3.448360000000000127e+03
2.021656999999999971e+04	1.728927000000000044e+04	1.333139999999999964e+04	1.065367000000000007e+04	1.424062999999999920e+04	6.199970000000000255e+03	6.315359999999999673e+03	1.805468000000000029e+04	1.570622999999999956e+04	7.607140000000000327e+03	9.231700000000000728e+03	1.675850999999999840e+04	1.299567000000000007e+04	9.088559999999999491e+03	9.299450000000000728e+03	1.601147999999999956e+04	1.703313999999999942e+04	1.608360000000000036e+04	4.170859999999999673e+03	1.883240999999999985e+04	9.793290000000000873e+03	1.411756999999999971e+04	2.782210000000000036e+03	1.314256999999999971e+04	3.490119999999999891e+03	3.598829999999999927e+03	2.244429999999999836e+03	1.858129999999999927e+04	1.390823999999999978e+04	9.793889999999999418e+03	8.908870000000000800e+03	7.931319999999999709e+03	8.963079999999999927e+03	5.011090000000000146e+03	7.212220000000000255e+03	1.076568000000000029e+04	1.175495000000000073e+04	5.942600000000000364e+03	1.931354000000000087e+04	5.942600000000000364e+03	1.859183000000000175e+04	3.598829999999999927e+03	6.268600000000000364e+03	1.883240999999999985e+04	1.728140000000000146e+04	1.703313999999999942e+04	8.963079999999999927e+03	3.465329999999999927e+03	3.309170000000000073e+03	4.353930000000000291e+03
2.555879000000000087e+04	2.242452999999999884e+04	1.736533000000000175e+04	1.411872999999999956e+04	1.839554000000000087e+04	5.985810000000000400e+03	7.378500000000000000e+03	2.334595999999999913e+04	2.018547000000000116e+04	9.792739999999999782e+03	1.233163999999999942e+04	2.157170000000000073e+04	1.698002000000000044e+04	2.655630000000000109e+03	1.242704000000000087e+04	2.061122000000000116e+04	1.724352000000000044e+04	1.639818000000000029e+04	7.543630000000000109e+03	1.843706999999999971e+04	1.135713999999999942e+04	1.483977000000000044e+04	6.469840000000000146e+03	1.395476000000000022e+04	7.032319999999999709e+03	7.117460000000000036e+03	5.973430000000000291e+03	1.826931000000000131e+04	1.464132999999999993e+04	1.137359000000000015e+04	1.076118000000000029e+04	1.010647999999999956e+04	1.077896999999999935e+04	8.209559999999999491e+03	9.658280000000000655e+03	1.213322999999999956e+04	1.293329000000000087e+04	8.894850000000000364e+03	1.876800000000000000e+04	8.894850000000000364e+03	1.828620999999999913e+04	7.117460000000000036e+03	4.990010000000000218e+03	1.843706999999999971e+04	1.740079000000000087e+04	1.724352000000000044e+04	1.077896999999999935e+04	7.037640000000000327e+03	6.907180000000000291e+03	4.612199999999999818e+03
2.035954000000000087e+04	1.741313999999999942e+04	1.337197999999999956e+04	1.064280999999999949e+04	1.429272999999999956e+04	5.940210000000000036e+03	6.110109999999999673e+03	1.819047999999999956e+04	1.578379999999999927e+04	7.485970000000000255e+03	9.185440000000000509e+03	1.686022999999999956e+04	1.303154999999999927e+04	8.758549999999999272e+03	9.255579999999999927e+03	1.609755999999999949e+04	1.689645000000000073e+04	1.594750000000000000e+04	4.023960000000000036e+03	1.867702999999999884e+04	9.670479999999999563e+03	1.398955999999999949e+04	2.562730000000000018e+03	1.301279999999999927e+04	3.317010000000000218e+03	3.431000000000000000e+03	1.963109999999999900e+03	1.842847999999999956e+04	1.377954999999999927e+04	9.671850000000000364e+03	8.789829999999999927e+03	7.815020000000000437e+03	8.842899999999999636e+03	4.886949999999999818e+03	7.098350000000000364e+03	1.064322999999999956e+04	1.163203000000000065e+04	5.830710000000000036e+03	1.915361999999999898e+04	5.830710000000000036e+03	1.843929999999999927e+04	3.431000000000000000e+03	6.090289999999999964e+03	1.867702999999999884e+04	1.714183000000000175e+04	1.689645000000000073e+04	8.842899999999999636e+03	3.293039999999999964e+03	3.127840000000000146e+03	4.148229999999999563e+03
2.556829000000000087e+04	2.243440000000000146e+04	1.737754000000000087e+04	1.413146999999999935e+04	1.840763999999999942e+04	6.000390000000000327e+03	7.392109999999999673e+03	2.335540999999999985e+04	2.019700000000000000e+04	9.806229999999999563e+03	1.234454000000000087e+04	2.158245999999999913e+04	1.699227999999999884e+04	2.676059999999999945e+03	1.243990999999999985e+04	2.062247000000000116e+04	1.726308000000000175e+04	1.641749000000000160e+04	7.551270000000000437e+03	1.845745999999999913e+04	1.137295000000000073e+04	1.485820999999999913e+04	6.473630000000000109e+03	1.397285000000000036e+04	7.038329999999999927e+03	7.123750000000000000e+03	5.974640000000000327e+03	1.828959999999999854e+04	1.465970999999999913e+04	1.138937999999999920e+04	1.077607999999999993e+04	1.012022999999999956e+04	1.079395999999999913e+04	8.218809999999999491e+03	9.671049999999999272e+03	1.214976000000000022e+04	1.295046999999999935e+04	8.905620000000000800e+03	1.878856999999999971e+04	8.905620000000000800e+03	1.830650000000000000e+04	7.123750000000000000e+03	4.969760000000000218e+03	1.845745999999999913e+04	1.742047999999999956e+04	1.726308000000000175e+04	1.079395999999999913e+04	7.043569999999999709e+03	6.912680000000000291e+03	4.596819999999999709e+03
2.309295000000000073e+04	1.997027000000000044e+04	1.501322999999999956e+04	1.180437999999999920e+04	1.603626000000000022e+04	3.922170000000000073e+03	5.179479999999999563e+03	2.087947999999999956e+04	1.779606000000000131e+04	7.552130000000000109e+03	1.003334000000000015e+04	1.914883000000000175e+04	1.463084000000000015e+04	3.824210000000000036e+03	1.012696999999999935e+04	1.820909000000000015e+04	1.572021999999999935e+04	1.482762999999999920e+04	5.044359999999999673e+03	1.711706000000000131e+04	9.314440000000000509e+03	1.311971999999999935e+04	3.965829999999999927e+03	1.218636000000000058e+04	4.514819999999999709e+03	4.601439999999999600e+03	3.543849999999999909e+03	1.692065999999999985e+04	1.291312999999999920e+04	9.328069999999999709e+03	8.631040000000000873e+03	7.883310000000000400e+03	8.657110000000000582e+03	5.750210000000000036e+03	7.366470000000000255e+03	1.016611000000000058e+04	1.103987999999999920e+04	6.493560000000000400e+03	1.750054000000000087e+04	6.493560000000000400e+03	1.693590000000000146e+04	4.601439999999999600e+03	5.329859999999999673e+03	1.711706000000000131e+04	1.590694000000000051e+04	1.572021999999999935e+04	8.657110000000000582e+03	4.519859999999999673e+03	4.388819999999999709e+03	3.996010000000000218e+03
1.934145000000000073e+04	1.654865000000000146e+04	1.313978000000000065e+04	1.081445000000000073e+04	1.396793000000000029e+04	7.815989999999999782e+03	7.657939999999999600e+03	1.723550000000000000e+04	1.526297999999999956e+04	8.472420000000000073e+03	9.631639999999999418e+03	1.615820000000000073e+04	1.283714999999999964e+04	1.107104999999999927e+04	9.683850000000000364e+03	1.551337000000000080e+04	1.785756000000000131e+04	1.691093999999999869e+04	5.324850000000000364e+03	1.975620000000000073e+04	1.061667000000000007e+04	1.491385000000000036e+04	4.348760000000000218e+03	1.395862999999999920e+04	4.813409999999999854e+03	4.890579999999999927e+03	4.060070000000000164e+03	1.949131000000000131e+04	1.471045000000000073e+04	1.061286000000000058e+04	9.729139999999999418e+03	8.760719999999999345e+03	9.788540000000000873e+03	6.000010000000000218e+03	8.050170000000000073e+03	1.157050000000000000e+04	1.254819000000000051e+04	6.819710000000000036e+03	2.026168000000000029e+04	6.819710000000000036e+03	1.950009000000000015e+04	4.890579999999999927e+03	7.639130000000000109e+03	1.975620000000000073e+04	1.812113000000000102e+04	1.785756000000000131e+04	9.788540000000000873e+03	4.787090000000000146e+03	4.682029999999999745e+03	5.902880000000000109e+03
6.580340000000000146e+03	8.905879999999999200e+03	1.429347999999999956e+04	1.707206000000000131e+04	1.347802000000000044e+04	2.431700999999999840e+04	2.293418000000000029e+04	7.913430000000000291e+03	1.180140999999999985e+04	2.087159000000000015e+04	1.857152999999999884e+04	1.023204999999999927e+04	1.460517000000000007e+04	2.984238999999999942e+04	1.848527999999999884e+04	1.128902000000000044e+04	2.238122999999999956e+04	2.206109999999999854e+04	2.199047999999999956e+04	2.409825000000000000e+04	2.071031000000000131e+04	2.121483000000000175e+04	2.304179999999999927e+04	2.113713999999999942e+04	2.245270000000000073e+04	2.237118000000000029e+04	2.366286999999999898e+04	2.384479999999999927e+04	2.120911999999999898e+04	2.068549000000000160e+04	2.065622000000000116e+04	2.070216999999999825e+04	2.068427000000000044e+04	2.145763000000000102e+04	2.076693999999999869e+04	2.068111000000000058e+04	2.072706000000000131e+04	2.101000000000000000e+04	2.457568999999999869e+04	2.101000000000000000e+04	2.383268000000000029e+04	2.237118000000000029e+04	2.933227000000000044e+04	2.409825000000000000e+04	2.261772999999999956e+04	2.238122999999999956e+04	2.068427000000000044e+04	2.244672999999999956e+04	2.257581000000000131e+04	2.745525999999999840e+04
5.271729999999999563e+03	7.658289999999999964e+03	1.311380999999999949e+04	1.596338999999999942e+04	1.227305999999999949e+04	2.335666999999999825e+04	2.195874000000000160e+04	6.652409999999999854e+03	1.056368000000000029e+04	1.984786999999999898e+04	1.750284000000000015e+04	8.978620000000000800e+03	1.343481999999999971e+04	2.890102999999999884e+04	1.741484999999999854e+04	1.004762999999999920e+04	2.110481999999999971e+04	2.079786999999999898e+04	2.110720000000000073e+04	2.280784000000000015e+04	1.960459999999999854e+04	1.998620999999999913e+04	2.221633000000000175e+04	1.993145000000000073e+04	2.159691999999999825e+04	2.151097000000000116e+04	2.286584000000000015e+04	2.255590999999999985e+04	1.998522999999999956e+04	1.957979999999999927e+04	1.958268000000000029e+04	1.966638999999999942e+04	1.960859999999999854e+04	2.054133000000000175e+04	1.976027999999999884e+04	1.954274000000000160e+04	1.955818999999999869e+04	2.005636000000000058e+04	2.328261000000000058e+04	2.005636000000000058e+04	2.254361999999999898e+04	2.151097000000000116e+04	2.866233000000000175e+04	2.280784000000000015e+04	2.133897999999999956e+04	2.110481999999999971e+04	1.960859999999999854e+04	2.159211000000000058e+04	2.172756999999999971e+04	2.675920999999999913e+04
2.048508000000000175e+04	2.255836999999999898e+04	2.748718000000000029e+04	2.977140000000000146e+04	2.682674000000000160e+04	3.574734999999999854e+04	3.453029000000000087e+04	2.163631999999999971e+04	2.535052999999999884e+04	3.288438999999999942e+04	3.096886000000000058e+04	2.388220999999999913e+04	2.773936999999999898e+04	4.092351999999999680e+04	3.089702000000000044e+04	2.486547000000000116e+04	3.604326000000000204e+04	3.563493000000000029e+04	3.299112999999999738e+04	3.785326000000000204e+04	3.326876999999999680e+04	3.456587999999999738e+04	3.356941999999999825e+04	3.433886000000000058e+04	3.323273000000000320e+04	3.318740000000000146e+04	3.394504000000000087e+04	3.758944000000000233e+04	3.452913999999999942e+04	3.324458999999999651e+04	3.300600000000000000e+04	3.280187000000000262e+04	3.304700000000000000e+04	3.271706999999999971e+04	3.267091999999999825e+04	3.345323000000000320e+04	3.369622000000000116e+04	3.254729999999999927e+04	3.834927999999999884e+04	3.254729999999999927e+04	3.757858000000000175e+04	3.318740000000000146e+04	3.828751000000000204e+04	3.785326000000000204e+04	3.629491000000000349e+04	3.604326000000000204e+04	3.304700000000000000e+04	3.321884999999999854e+04	3.329488999999999942e+04	3.673168000000000029e+04
2.483952999999999884e+04	2.678802000000000044e+04	3.154045000000000073e+04	3.366161000000000058e+04	3.093127999999999884e+04	3.920654000000000087e+04	3.805286000000000058e+04	2.589475999999999840e+04	2.952791999999999825e+04	3.654561000000000058e+04	3.476116000000000349e+04	2.810216999999999825e+04	3.177318000000000029e+04	4.421631999999999971e+04	3.469418000000000029e+04	2.905493000000000029e+04	4.021640000000000146e+04	3.977098999999999796e+04	3.637337000000000262e+04	4.206823999999999796e+04	3.708144000000000233e+04	3.862115000000000146e+04	3.681287999999999738e+04	3.834358999999999651e+04	3.655090000000000146e+04	3.651619999999999709e+04	3.711451999999999680e+04	4.179937000000000262e+04	3.857358999999999651e+04	3.705769000000000233e+04	3.676097000000000116e+04	3.648844999999999709e+04	3.680523000000000320e+04	3.617404000000000087e+04	3.630473999999999796e+04	3.732784999999999854e+04	3.762966000000000349e+04	3.608238999999999942e+04	4.257372000000000116e+04	3.608238999999999942e+04	4.178919999999999709e+04	3.651619999999999709e+04	4.100191999999999825e+04	4.206823999999999796e+04	4.047436000000000058e+04	4.021640000000000146e+04	3.680523000000000320e+04	3.653513999999999942e+04	3.659541000000000349e+04	3.956755999999999767e+04
1.090170999999999913e+04	1.310705999999999949e+04	1.830759000000000015e+04	2.088950000000000000e+04	1.755731000000000131e+04	2.767829999999999927e+04	2.634838000000000102e+04	1.214646999999999935e+04	1.596494000000000051e+04	2.443470000000000073e+04	2.227334000000000015e+04	1.443738999999999942e+04	1.859468000000000029e+04	3.311363999999999942e+04	2.219240000000000146e+04	1.546328000000000065e+04	2.661502999999999884e+04	2.626006000000000131e+04	2.515731999999999971e+04	2.836877000000000044e+04	2.449475999999999840e+04	2.532343999999999869e+04	2.603461999999999898e+04	2.518531000000000131e+04	2.553756000000000131e+04	2.546936000000000058e+04	2.656781999999999971e+04	2.811129999999999927e+04	2.530522999999999956e+04	2.447004000000000087e+04	2.435504000000000087e+04	2.429922999999999956e+04	2.438859000000000015e+04	2.472179000000000087e+04	2.428477000000000044e+04	2.455265000000000146e+04	2.467922000000000116e+04	2.438129000000000087e+04	2.885334000000000015e+04	2.438129000000000087e+04	2.809965000000000146e+04	2.546936000000000058e+04	3.180761000000000058e+04	2.836877000000000044e+04	2.685763000000000102e+04	2.661502999999999884e+04	2.438859000000000015e+04	2.552838000000000102e+04	2.563809999999999854e+04	3.002627000000000044e+04
2.460797000000000116e+04	2.656659000000000015e+04	3.133222999999999956e+04	3.346469999999999709e+04	3.071940000000000146e+04	3.903819999999999709e+04	3.788033999999999651e+04	2.567106000000000131e+04	2.931065999999999985e+04	3.636404000000000087e+04	3.457083999999999651e+04	2.788161999999999898e+04	3.156633000000000175e+04	4.405918000000000029e+04	3.450354000000000087e+04	2.883674000000000160e+04	4.000033999999999651e+04	3.955766000000000349e+04	3.620926999999999680e+04	4.184908999999999651e+04	3.689013999999999942e+04	3.841355000000000291e+04	3.665741000000000349e+04	3.813950000000000000e+04	3.639079000000000087e+04	3.635541999999999825e+04	3.696361000000000058e+04	4.158059999999999854e+04	3.836673999999999796e+04	3.686636000000000058e+04	3.657338999999999942e+04	3.630523999999999796e+04	3.661744999999999709e+04	3.600526999999999680e+04	3.612487999999999738e+04	3.713248999999999796e+04	3.743037000000000262e+04	3.590873000000000320e+04	4.235386000000000058e+04	3.590873000000000320e+04	4.157037999999999738e+04	3.635541999999999825e+04	4.087925000000000000e+04	4.184908999999999651e+04	4.025783999999999651e+04	4.000033999999999651e+04	3.661744999999999709e+04	3.637513999999999942e+04	3.643638999999999942e+04	3.943731999999999971e+04
9.165090000000000146e+03	1.143640999999999985e+04	1.672240000000000146e+04	1.938934000000000015e+04	1.594373999999999978e+04	2.637493000000000029e+04	2.502149000000000160e+04	1.046085000000000036e+04	1.431350000000000000e+04	2.304406999999999971e+04	2.082268999999999869e+04	1.276617000000000007e+04	1.702013999999999942e+04	3.185368999999999869e+04	2.073945999999999913e+04	1.380669000000000051e+04	2.493474000000000160e+04	2.459695999999999913e+04	2.392902000000000044e+04	2.666925000000000000e+04	2.301268999999999869e+04	2.370218000000000029e+04	2.487831000000000131e+04	2.359100000000000000e+04	2.434311000000000058e+04	2.426938999999999942e+04	2.544802999999999884e+04	2.641397999999999956e+04	2.368961000000000058e+04	2.298790000000000146e+04	2.290841999999999825e+04	2.289447999999999956e+04	2.293972999999999956e+04	2.345329999999999927e+04	2.291243999999999869e+04	2.303404000000000087e+04	2.312636000000000058e+04	2.306877000000000044e+04	2.714981999999999971e+04	2.306877000000000044e+04	2.640206999999999971e+04	2.426938999999999942e+04	3.087122999999999956e+04	2.666925000000000000e+04	2.517425999999999840e+04	2.493474000000000160e+04	2.293972999999999956e+04	2.433520999999999913e+04	2.445295999999999913e+04	2.904804000000000087e+04
3.153949999999999818e+03	4.646630000000000109e+03	9.956600000000000364e+03	1.277632999999999993e+04	9.145719999999999345e+03	2.022711000000000058e+04	1.881956999999999971e+04	3.716000000000000000e+03	7.504000000000000000e+03	1.668131999999999971e+04	1.432019000000000051e+04	5.976090000000000146e+03	1.026980999999999949e+04	2.578150000000000000e+04	1.423178000000000065e+04	6.999829999999999927e+03	1.815527999999999884e+04	1.779584999999999854e+04	1.804947000000000116e+04	1.993440000000000146e+04	1.641752999999999884e+04	1.689481999999999971e+04	1.921954999999999927e+04	1.680302000000000044e+04	1.856731000000000131e+04	1.847672999999999956e+04	1.990141999999999825e+04	1.967263999999999942e+04	1.688506000000000131e+04	1.639272000000000116e+04	1.639843999999999869e+04	1.649431999999999971e+04	1.642395000000000073e+04	1.745234000000000015e+04	1.660300000000000000e+04	1.636160000000000036e+04	1.639281999999999971e+04	1.693572000000000116e+04	2.042788000000000102e+04	1.693572000000000116e+04	1.966149000000000160e+04	1.847672999999999956e+04	2.585102999999999884e+04	1.993440000000000146e+04	1.840027999999999884e+04	1.815527999999999884e+04	1.642395000000000073e+04	1.856379999999999927e+04	1.870600000000000000e+04	2.391640999999999985e+04
1.310103000000000065e+04	1.526357999999999993e+04	2.038536999999999898e+04	2.288327999999999884e+04	1.966140999999999985e+04	2.945866999999999825e+04	2.815625000000000000e+04	1.431500000000000000e+04	1.810318000000000029e+04	2.631249000000000160e+04	2.421597000000000116e+04	1.659300999999999840e+04	2.066234000000000015e+04	3.483762000000000262e+04	2.413745999999999913e+04	1.760625000000000000e+04	2.877206000000000131e+04	2.840202999999999884e+04	2.686427000000000044e+04	3.054179999999999927e+04	2.646474000000000160e+04	2.742752000000000044e+04	2.766206999999999971e+04	2.726409000000000015e+04	2.720738999999999942e+04	2.714527999999999884e+04	2.815415999999999985e+04	3.028252999999999884e+04	2.740404999999999927e+04	2.644013000000000102e+04	2.628975000000000000e+04	2.619168000000000029e+04	2.632549000000000160e+04	2.647231999999999971e+04	2.614413999999999942e+04	2.655875000000000000e+04	2.671863000000000102e+04	2.617870000000000073e+04	3.102958000000000175e+04	2.617870000000000073e+04	3.027109000000000015e+04	2.714527999999999884e+04	3.317530000000000291e+04	3.054179999999999927e+04	2.901725000000000000e+04	2.877206000000000131e+04	2.632549000000000160e+04	2.719686999999999898e+04	2.729768000000000029e+04	3.144609000000000015e+04
1.478231999999999971e+04	1.695959000000000015e+04	2.206297999999999956e+04	2.452890000000000146e+04	2.134697999999999956e+04	3.099877999999999884e+04	2.971161999999999898e+04	1.601135000000000036e+04	1.979670000000000073e+04	2.790395000000000073e+04	2.583891999999999825e+04	1.828888999999999942e+04	2.233658000000000175e+04	3.634351000000000204e+04	2.576154000000000087e+04	1.930056999999999971e+04	3.046779999999999927e+04	3.009559999999999854e+04	2.836825000000000000e+04	3.223808000000000175e+04	2.809850999999999840e+04	2.911188999999999942e+04	2.912186000000000058e+04	2.894047000000000116e+04	2.869097999999999956e+04	2.863224000000000160e+04	2.959034999999999854e+04	3.197888999999999942e+04	2.908686000000000058e+04	2.807395000000000073e+04	2.790788000000000102e+04	2.779022000000000116e+04	2.794459999999999854e+04	2.799974000000000160e+04	2.772683000000000175e+04	2.820779999999999927e+04	2.838090000000000146e+04	2.773054000000000087e+04	3.272563000000000102e+04	2.773054000000000087e+04	3.196743999999999869e+04	2.863224000000000160e+04	3.447623999999999796e+04	3.223808000000000175e+04	3.071322999999999956e+04	3.046779999999999927e+04	2.794459999999999854e+04	2.867975000000000000e+04	2.877559000000000015e+04	3.278093000000000029e+04
9.382319999999999709e+03	1.164670000000000073e+04	1.692295000000000073e+04	1.957984000000000015e+04	1.614762999999999920e+04	2.654206999999999971e+04	2.519138000000000102e+04	1.067280999999999949e+04	1.452176000000000022e+04	2.322156999999999971e+04	2.100729999999999927e+04	1.297662999999999920e+04	1.721943000000000029e+04	3.201600000000000000e+04	2.092434000000000015e+04	1.401551000000000022e+04	2.514661999999999898e+04	2.480693999999999869e+04	2.408661000000000058e+04	2.688318000000000029e+04	2.320133000000000175e+04	2.390738999999999942e+04	2.502711999999999898e+04	2.379306999999999971e+04	2.449656999999999971e+04	2.442352999999999884e+04	2.559240000000000146e+04	2.662768999999999869e+04	2.389415999999999985e+04	2.317654000000000087e+04	2.309274000000000160e+04	2.307368999999999869e+04	2.312433000000000175e+04	2.361581000000000131e+04	2.308768000000000029e+04	2.322708000000000175e+04	2.332350999999999840e+04	2.323666999999999825e+04	2.736416999999999825e+04	2.323666999999999825e+04	2.661579999999999927e+04	2.442352999999999884e+04	3.099359999999999854e+04	2.688318000000000029e+04	2.538647999999999956e+04	2.514661999999999898e+04	2.312433000000000175e+04	2.448850999999999840e+04	2.460529000000000087e+04	2.917536999999999898e+04
1.784006000000000131e+04	1.990395000000000073e+04	2.485956999999999971e+04	2.718681999999999971e+04	2.418845999999999913e+04	3.331256999999999971e+04	3.207197000000000116e+04	1.898075000000000000e+04	2.270077999999999884e+04	3.037499000000000160e+04	2.841499000000000160e+04	2.122831999999999971e+04	2.511625000000000000e+04	3.854940000000000146e+04	2.834156999999999971e+04	2.221436000000000058e+04	3.339229000000000087e+04	3.298879000000000087e+04	3.059384999999999854e+04	3.519866999999999825e+04	3.070554999999999927e+04	3.193465000000000146e+04	3.123138999999999942e+04	3.171925999999999840e+04	3.086256999999999971e+04	3.081270999999999913e+04	3.163933000000000175e+04	3.493516000000000349e+04	3.190025999999999840e+04	3.068125999999999840e+04	3.046259999999999854e+04	3.028318999999999869e+04	3.050243000000000029e+04	3.028884000000000015e+04	3.017215999999999985e+04	3.087015999999999985e+04	3.109570000000000073e+04	3.008740999999999985e+04	3.569420999999999913e+04	3.008740999999999985e+04	3.492426000000000204e+04	3.081270999999999913e+04	3.618400000000000000e+04	3.519866999999999825e+04	3.364325000000000000e+04	3.339229000000000087e+04	3.050243000000000029e+04	3.084954999999999927e+04	3.093229999999999927e+04	3.457412999999999738e+04
4.174069999999999709e+03	6.290600000000000364e+03	1.169459000000000015e+04	1.452887000000000080e+04	1.086665999999999985e+04	2.194006999999999971e+04	2.053854000000000087e+04	5.305840000000000146e+03	9.183860000000000582e+03	1.841808000000000175e+04	1.606827000000000044e+04	7.618250000000000000e+03	1.201207999999999993e+04	2.748859999999999854e+04	1.598019000000000051e+04	8.671829999999999927e+03	1.977938999999999942e+04	1.944933000000000175e+04	1.971715999999999985e+04	2.151652999999999884e+04	1.817006000000000131e+04	1.859788999999999942e+04	2.085006999999999971e+04	1.852640000000000146e+04	2.021777000000000044e+04	2.013000999999999840e+04	2.151245999999999913e+04	2.126016999999999825e+04	1.859297999999999956e+04	1.814525000000000000e+04	1.814779000000000087e+04	1.823483000000000175e+04	1.817363999999999942e+04	1.913936999999999898e+04	1.833356999999999971e+04	1.811225000000000000e+04	1.813579000000000087e+04	1.864263999999999942e+04	2.199974000000000160e+04	1.864263999999999942e+04	2.124836999999999898e+04	2.013000999999999840e+04	2.737250000000000000e+04	2.151652999999999884e+04	2.001840000000000146e+04	1.977938999999999942e+04	1.817363999999999942e+04	2.021345999999999913e+04	2.035154999999999927e+04	2.545584999999999854e+04
1.687495000000000073e+04	1.894302000000000044e+04	2.391745000000000073e+04	2.626781999999999971e+04	2.323986999999999898e+04	3.246359000000000015e+04	3.121261999999999898e+04	1.801774000000000160e+04	2.174424000000000160e+04	2.949227000000000044e+04	2.751122999999999956e+04	2.026799000000000160e+04	2.417670999999999913e+04	3.772593000000000029e+04	2.743704999999999927e+04	2.125670000000000073e+04	3.243447999999999956e+04	3.203459999999999854e+04	2.976290000000000146e+04	3.423733999999999651e+04	2.979670000000000073e+04	3.098986000000000058e+04	3.042672999999999956e+04	3.078109000000000015e+04	3.004372000000000116e+04	2.999186000000000058e+04	3.084877000000000044e+04	3.397420999999999913e+04	3.095684000000000015e+04	2.977234999999999854e+04	2.956352999999999884e+04	2.939608000000000175e+04	2.960277000000000044e+04	2.944393000000000029e+04	2.929454000000000087e+04	2.995133000000000175e+04	3.016783000000000175e+04	2.922800999999999840e+04	3.473219999999999709e+04	2.922800999999999840e+04	3.396326000000000204e+04	2.999186000000000058e+04	3.547791000000000349e+04	3.423733999999999651e+04	3.268486000000000058e+04	3.243447999999999956e+04	2.960277000000000044e+04	3.003109999999999854e+04	3.011681999999999971e+04	3.384608000000000175e+04
1.659995999999999913e+04	1.869168999999999869e+04	2.369183000000000175e+04	2.606358000000000175e+04	2.300693999999999869e+04	3.230750000000000000e+04	3.105025000000000000e+04	1.776159999999999854e+04	2.150054999999999927e+04	2.931481000000000131e+04	2.731893000000000029e+04	2.001779000000000087e+04	2.395379000000000087e+04	3.758433999999999651e+04	2.724418000000000029e+04	2.101122999999999956e+04	3.218824000000000160e+04	3.179388000000000102e+04	2.961781000000000131e+04	3.398451000000000204e+04	2.960029999999999927e+04	3.076086999999999898e+04	3.029638999999999942e+04	3.055909999999999854e+04	2.990554000000000087e+04	2.985254999999999927e+04	3.072600000000000000e+04	3.372219000000000233e+04	3.072936000000000058e+04	2.957590999999999985e+04	2.937450999999999840e+04	2.921561000000000058e+04	2.941333000000000175e+04	2.929061999999999898e+04	2.912054999999999927e+04	2.974691999999999825e+04	2.995563999999999942e+04	2.906581000000000131e+04	3.447786000000000058e+04	2.906581000000000131e+04	3.371112999999999738e+04	2.985254999999999927e+04	3.539672000000000116e+04	3.398451000000000204e+04	3.243763000000000102e+04	3.218824000000000160e+04	2.941333000000000175e+04	2.989313999999999942e+04	2.998052999999999884e+04	3.375462999999999738e+04
2.299750000000000000e+03	3.816960000000000036e+03	9.259620000000000800e+03	1.217509000000000015e+04	8.409299999999999272e+03	1.978193999999999869e+04	1.836183000000000175e+04	2.845840000000000146e+03	6.709680000000000291e+03	1.617485000000000036e+04	1.376629999999999927e+04	5.145819999999999709e+03	9.586610000000000582e+03	2.534404000000000087e+04	1.367595999999999913e+04	6.197159999999999854e+03	1.731600000000000000e+04	1.697733000000000175e+04	1.769493999999999869e+04	1.907240999999999985e+04	1.581242000000000007e+04	1.612697999999999956e+04	1.892015999999999985e+04	1.606726000000000022e+04	1.823950999999999840e+04	1.814470000000000073e+04	1.962775999999999840e+04	1.881320999999999913e+04	1.612394000000000051e+04	1.578768000000000029e+04	1.583306999999999971e+04	1.597413999999999942e+04	1.585592000000000007e+04	1.706475000000000000e+04	1.611673999999999978e+04	1.571523999999999978e+04	1.570672999999999956e+04	1.650890000000000146e+04	1.956125999999999840e+04	1.650890000000000146e+04	1.880174000000000160e+04	1.814470000000000073e+04	2.567554000000000087e+04	1.907240999999999985e+04	1.755733000000000175e+04	1.731600000000000000e+04	1.585592000000000007e+04	1.823724000000000160e+04	1.838543999999999869e+04	2.372370000000000073e+04
7.579479999999999563e+03	9.884729999999999563e+03	1.523252000000000044e+04	1.796699000000000160e+04	1.443176000000000022e+04	2.511140999999999985e+04	2.373963000000000102e+04	8.899030000000000655e+03	1.277354000000000087e+04	2.171008000000000175e+04	1.944049000000000160e+04	1.121278000000000065e+04	1.553864999999999964e+04	3.062052000000000044e+04	1.935541999999999825e+04	1.226329000000000087e+04	2.337075000000000000e+04	2.304393000000000029e+04	2.273591999999999825e+04	2.509420999999999913e+04	2.160075999999999840e+04	2.217879999999999927e+04	2.374720000000000073e+04	2.208793999999999869e+04	2.317920999999999913e+04	2.310075000000000000e+04	2.434824000000000160e+04	2.484011000000000058e+04	2.217040000000000146e+04	2.157593999999999869e+04	2.152656000000000131e+04	2.154852999999999884e+04	2.155593000000000029e+04	2.222559000000000015e+04	2.159456000000000131e+04	2.159174000000000160e+04	2.165615999999999985e+04	2.180297000000000116e+04	2.557275999999999840e+04	2.180297000000000116e+04	2.482806999999999971e+04	2.310075000000000000e+04	2.992372999999999956e+04	2.509420999999999913e+04	2.360838999999999942e+04	2.337075000000000000e+04	2.155593000000000029e+04	2.317245999999999913e+04	2.329711000000000058e+04	2.806683000000000175e+04
1.511273999999999978e+04	1.729534000000000015e+04	2.239779999999999927e+04	2.485965999999999985e+04	2.168256999999999971e+04	3.131316999999999825e+04	3.002852999999999884e+04	1.634667000000000007e+04	2.013270000000000073e+04	2.822661000000000058e+04	2.616640999999999985e+04	1.862468999999999869e+04	2.267104000000000087e+04	3.665201000000000204e+04	2.608920000000000073e+04	1.963654999999999927e+04	3.080363000000000102e+04	3.043159999999999854e+04	2.867693000000000029e+04	3.257329000000000087e+04	2.842750999999999840e+04	2.944736000000000058e+04	2.942315999999999985e+04	2.927511999999999898e+04	2.899627999999999884e+04	2.893809000000000015e+04	2.988763999999999942e+04	3.231420000000000073e+04	2.942216999999999825e+04	2.840295999999999913e+04	2.823459000000000015e+04	2.811397999999999956e+04	2.827145000000000073e+04	2.831225000000000000e+04	2.804813999999999942e+04	2.853895000000000073e+04	2.871381999999999971e+04	2.804700000000000000e+04	3.306062000000000262e+04	2.804700000000000000e+04	3.230274000000000160e+04	2.893809000000000015e+04	3.474973999999999796e+04	3.257329000000000087e+04	3.104900000000000000e+04	3.080363000000000102e+04	2.827145000000000073e+04	2.898491999999999825e+04	2.907993000000000029e+04	3.306052999999999884e+04
6.865970000000000255e+03	9.176750000000000000e+03	1.454831999999999971e+04	1.731081000000000131e+04	1.373854999999999927e+04	2.452179999999999927e+04	2.314254999999999927e+04	8.187430000000000291e+03	1.206945000000000073e+04	2.109095000000000073e+04	1.880120999999999913e+04	1.050385000000000036e+04	1.485790999999999985e+04	3.004213000000000102e+04	1.871536999999999898e+04	1.155796999999999935e+04	2.265743000000000029e+04	2.233409999999999854e+04	2.217897999999999956e+04	2.437797999999999956e+04	2.094768999999999869e+04	2.147972999999999956e+04	2.321745000000000073e+04	2.139679999999999927e+04	2.263509999999999854e+04	2.255456000000000131e+04	2.383215999999999985e+04	2.412413999999999942e+04	2.147293000000000029e+04	2.092286999999999898e+04	2.088654000000000087e+04	2.092420999999999913e+04	2.091504999999999927e+04	2.165345999999999913e+04	2.098259999999999854e+04	2.092572000000000116e+04	2.097845999999999913e+04	2.121404999999999927e+04	2.485613000000000102e+04	2.121404999999999927e+04	2.411206999999999971e+04	2.255456000000000131e+04	2.947249000000000160e+04	2.437797999999999956e+04	2.289450999999999840e+04	2.265743000000000029e+04	2.091504999999999927e+04	2.262886999999999898e+04	2.275652999999999884e+04	2.760159999999999854e+04
3.597360000000000127e+03	1.800890000000000100e+03	5.528069999999999709e+03	8.803790000000000873e+03	4.497439999999999600e+03	1.696584999999999854e+04	1.552267000000000007e+04	2.335639999999999873e+03	2.636690000000000055e+03	1.314354000000000087e+04	1.057997999999999956e+04	1.423809999999999945e+03	5.913989999999999782e+03	2.243727999999999884e+04	1.048346999999999935e+04	2.205880000000000109e+03	1.242609000000000015e+04	1.218197999999999956e+04	1.547295999999999913e+04	1.408902000000000044e+04	1.221692000000000007e+04	1.159645999999999913e+04	1.695872000000000116e+04	1.171229000000000087e+04	1.614573999999999978e+04	1.603101000000000022e+04	1.778334000000000015e+04	1.383932999999999993e+04	1.162944000000000051e+04	1.219351000000000022e+04	1.247062000000000080e+04	1.287152000000000044e+04	1.247687999999999920e+04	1.468229999999999927e+04	1.320660000000000036e+04	1.188130999999999949e+04	1.164220000000000073e+04	1.392644000000000051e+04	1.456156999999999971e+04	1.392644000000000051e+04	1.382676000000000022e+04	1.603101000000000022e+04	2.419772000000000116e+04	1.408902000000000044e+04	1.265092000000000007e+04	1.242609000000000015e+04	1.247687999999999920e+04	1.615057999999999993e+04	1.632652000000000044e+04	2.219915000000000146e+04
1.234729000000000087e+04	1.021064999999999964e+04	6.901529999999999745e+03	7.820079999999999927e+03	6.891369999999999891e+03	1.405801000000000022e+04	1.289285000000000036e+04	1.108160000000000036e+04	7.676279999999999745e+03	1.076956999999999971e+04	8.943030000000000655e+03	8.923139999999999418e+03	6.945920000000000073e+03	1.849122000000000116e+04	8.883270000000000437e+03	8.079960000000000036e+03	4.120149999999999636e+03	4.352520000000000437e+03	1.420117000000000007e+04	5.344810000000000400e+03	8.722979999999999563e+03	5.141380000000000109e+03	1.586865999999999985e+04	5.931430000000000291e+03	1.497170999999999913e+04	1.484364999999999964e+04	1.675663000000000102e+04	5.127640000000000327e+03	5.315869999999999891e+03	8.712870000000000800e+03	9.511659999999999854e+03	1.042169000000000051e+04	9.471610000000000582e+03	1.328703000000000065e+04	1.109937000000000080e+04	7.823789999999999964e+03	6.943460000000000036e+03	1.232485000000000036e+04	5.770079999999999927e+03	1.232485000000000036e+04	5.112100000000000364e+03	1.484364999999999964e+04	2.295202000000000044e+04	5.344810000000000400e+03	4.249689999999999600e+03	4.120149999999999636e+03	9.471610000000000582e+03	1.498982999999999993e+04	1.518097999999999956e+04	2.109700999999999840e+04
1.523970000000000027e+03	1.781420000000000073e+03	7.406750000000000000e+03	1.050987999999999920e+04	6.474319999999999709e+03	1.841311000000000058e+04	1.697354999999999927e+04	7.495199999999999818e+02	4.662300000000000182e+03	1.469047999999999956e+04	1.219432999999999993e+04	3.040960000000000036e+03	7.761939999999999600e+03	2.396534000000000015e+04	1.210043000000000029e+04	4.139420000000000073e+03	1.512673999999999978e+04	1.482236000000000058e+04	1.655513000000000102e+04	1.684968000000000029e+04	1.410343000000000029e+04	1.406729000000000087e+04	1.790050000000000000e+04	1.407222999999999956e+04	1.715825999999999840e+04	1.705425000000000000e+04	1.866343999999999869e+04	1.659391999999999825e+04	1.407751000000000022e+04	1.407900000000000000e+04	1.421479999999999927e+04	1.445950000000000000e+04	1.423137000000000080e+04	1.585235000000000036e+04	1.468023999999999978e+04	1.391410000000000036e+04	1.381831999999999971e+04	1.520885000000000036e+04	1.733259000000000015e+04	1.520885000000000036e+04	1.658204000000000087e+04	1.705425000000000000e+04	2.490565000000000146e+04	1.684968000000000029e+04	1.536222999999999956e+04	1.512673999999999978e+04	1.423137000000000080e+04	1.715895000000000073e+04	1.732011000000000058e+04	2.292356000000000131e+04
6.494289999999999964e+03	4.541539999999999964e+03	4.591050000000000182e+03	7.622619999999999891e+03	3.708010000000000218e+03	1.572061000000000058e+04	1.431385000000000036e+04	5.303279999999999745e+03	2.860679999999999836e+03	1.189998999999999978e+04	9.384319999999999709e+03	3.398739999999999782e+03	4.937010000000000218e+03	2.099104000000000087e+04	9.290780000000000655e+03	2.974489999999999782e+03	9.570159999999999854e+03	9.419139999999999418e+03	1.471312000000000080e+04	1.114095999999999913e+04	1.055977000000000044e+04	9.104319999999999709e+03	1.631607999999999993e+04	9.387180000000000291e+03	1.544561000000000058e+04	1.532201000000000022e+04	1.718866999999999825e+04	1.090004999999999927e+04	9.171690000000000509e+03	1.053876000000000022e+04	1.099662000000000080e+04	1.158659000000000015e+04	1.098872999999999956e+04	1.384598999999999978e+04	1.205434000000000015e+04	1.003238999999999942e+04	9.594420000000000073e+03	1.298312999999999920e+04	1.159898999999999978e+04	1.298312999999999920e+04	1.088659000000000015e+04	1.532201000000000022e+04	2.366975999999999840e+04	1.114095999999999913e+04	9.777840000000000146e+03	9.570159999999999854e+03	1.098872999999999956e+04	1.545515999999999985e+04	1.564279000000000087e+04	2.168497000000000116e+04
1.826118000000000029e+04	1.601953000000000065e+04	1.183998999999999978e+04	1.130745999999999913e+04	1.216470999999999913e+04	1.433629999999999927e+04	1.363871999999999935e+04	1.693075000000000000e+04	1.332432999999999993e+04	1.227785000000000036e+04	1.158365999999999985e+04	1.470540999999999985e+04	1.174045000000000073e+04	1.723665999999999985e+04	1.157011000000000058e+04	1.377656999999999971e+04	3.093300000000000182e+03	3.961900000000000091e+03	1.563389999999999964e+04	1.004019999999999982e+03	1.013537999999999920e+04	5.934659999999999854e+03	1.713179999999999927e+04	6.835739999999999782e+03	1.632829999999999927e+04	1.621396999999999935e+04	1.792799000000000160e+04	1.291599999999999909e+03	6.121250000000000000e+03	1.014036000000000058e+04	1.101979000000000087e+04	1.198590999999999985e+04	1.095982999999999993e+04	1.482309000000000015e+04	1.269773999999999978e+04	9.196540000000000873e+03	8.241280000000000655e+03	1.394292000000000007e+04	4.927099999999999795e+02	1.394292000000000007e+04	1.287930000000000064e+03	1.621396999999999935e+04	2.329997000000000116e+04	1.004019999999999982e+03	2.798239999999999782e+03	3.093300000000000182e+03	1.095982999999999993e+04	1.635211000000000058e+04	1.652033000000000175e+04	2.170775000000000000e+04
2.908210000000000036e+03	1.270640000000000100e+03	5.964470000000000255e+03	9.211280000000000655e+03	4.953960000000000036e+03	1.732231000000000131e+04	1.587711000000000058e+04	1.583980000000000018e+03	3.064800000000000182e+03	1.352036000000000058e+04	1.096790999999999985e+04	1.549769999999999982e+03	6.344409999999999854e+03	2.282547000000000116e+04	1.087178000000000065e+04	2.572699999999999818e+03	1.316257999999999993e+04	1.289859000000000015e+04	1.571885000000000036e+04	1.484573999999999978e+04	1.269472999999999956e+04	1.225748999999999978e+04	1.716774000000000160e+04	1.233784000000000015e+04	1.637318000000000029e+04	1.626126000000000022e+04	1.797652999999999884e+04	1.459400000000000000e+04	1.228317000000000007e+04	1.267094000000000051e+04	1.290535000000000036e+04	1.325989999999999964e+04	1.291478000000000065e+04	1.495163999999999942e+04	1.356154999999999927e+04	1.240373999999999978e+04	1.220914999999999964e+04	1.422662000000000080e+04	1.532179000000000087e+04	1.422662000000000080e+04	1.458165999999999985e+04	1.626126000000000022e+04	2.435270000000000073e+04	1.484573999999999978e+04	1.339101000000000022e+04	1.316257999999999993e+04	1.291478000000000065e+04	1.637682999999999993e+04	1.654893999999999869e+04	2.235602999999999884e+04
5.574539999999999964e+03	3.736090000000000146e+03	4.866159999999999854e+03	8.042930000000000291e+03	3.889460000000000036e+03	1.620925000000000000e+04	1.478726000000000022e+04	4.435840000000000146e+03	2.599590000000000146e+03	1.237337000000000080e+04	9.826969999999999345e+03	2.707719999999999800e+03	5.237579999999999927e+03	2.154861999999999898e+04	9.731750000000000000e+03	2.550929999999999836e+03	1.047697999999999956e+04	1.030738999999999942e+04	1.505504999999999927e+04	1.206012000000000080e+04	1.114901000000000022e+04	9.925610000000000582e+03	1.662886999999999898e+04	1.016395000000000073e+04	1.577252000000000044e+04	1.565110000000000036e+04	1.748993999999999869e+04	1.181856999999999971e+04	9.983989999999999782e+03	1.112718000000000029e+04	1.153386000000000058e+04	1.207068000000000029e+04	1.153012999999999920e+04	1.420713999999999942e+04	1.250129000000000087e+04	1.067543000000000029e+04	1.029330999999999949e+04	1.337229000000000087e+04	1.251875000000000000e+04	1.337229000000000087e+04	1.180518000000000029e+04	1.565110000000000036e+04	2.396559000000000015e+04	1.206012000000000080e+04	1.068765999999999985e+04	1.047697999999999956e+04	1.153012999999999920e+04	1.578070000000000073e+04	1.596551000000000022e+04	2.197320000000000073e+04
1.183079999999999927e+04	9.687700000000000728e+03	6.475189999999999600e+03	7.563489999999999782e+03	6.423119999999999891e+03	1.405270999999999913e+04	1.285510000000000036e+04	1.055804000000000087e+04	7.164989999999999782e+03	1.068293000000000029e+04	8.765069999999999709e+03	8.401479999999999563e+03	6.537659999999999854e+03	1.859249000000000160e+04	8.701170000000000073e+03	7.564199999999999818e+03	4.530930000000000291e+03	4.686229999999999563e+03	1.408663999999999942e+04	5.841289999999999964e+03	8.680680000000000291e+03	5.297170000000000073e+03	1.575847999999999956e+04	6.031449999999999818e+03	1.485871999999999935e+04	1.473027000000000044e+04	1.664968000000000029e+04	5.617689999999999600e+03	5.459489999999999782e+03	8.669229999999999563e+03	9.444399999999999636e+03	1.033429999999999927e+04	9.407090000000000146e+03	1.317014999999999964e+04	1.099942000000000007e+04	7.806829999999999927e+03	6.960789999999999964e+03	1.220906999999999971e+04	6.276000000000000000e+03	1.220906999999999971e+04	5.602649999999999636e+03	1.473027000000000044e+04	2.289341999999999825e+04	5.841289999999999964e+03	4.679079999999999927e+03	4.530930000000000291e+03	9.407090000000000146e+03	1.487617000000000007e+04	1.506815999999999985e+04	2.102124000000000160e+04
2.081254999999999927e+04	1.846813999999999942e+04	1.397600000000000000e+04	1.297631999999999971e+04	1.441052000000000044e+04	1.454095000000000073e+04	1.409011000000000058e+04	1.940545000000000073e+04	1.570364999999999964e+04	1.313937999999999920e+04	1.293307999999999993e+04	1.714370999999999913e+04	1.383059000000000015e+04	1.659856999999999971e+04	1.293747999999999956e+04	1.617496999999999935e+04	5.061939999999999600e+03	5.683600000000000364e+03	1.627590999999999985e+04	3.182119999999999891e+03	1.113823999999999978e+04	7.388289999999999964e+03	1.763933000000000175e+04	8.120460000000000036e+03	1.690793000000000029e+04	1.680424000000000160e+04	1.836666999999999825e+04	3.437920000000000073e+03	7.531579999999999927e+03	1.114865999999999985e+04	1.197863999999999942e+04	1.289098999999999978e+04	1.191589999999999964e+04	1.554676000000000022e+04	1.356755999999999949e+04	1.028687999999999920e+04	9.429399999999999636e+03	1.474640999999999985e+04	2.727349999999999909e+03	1.474640999999999985e+04	3.449369999999999891e+03	1.680424000000000160e+04	2.322600999999999840e+04	3.182119999999999891e+03	4.786859999999999673e+03	5.061939999999999600e+03	1.191589999999999964e+04	1.693320000000000073e+04	1.708470000000000073e+04	2.178790000000000146e+04
6.485920000000000073e+03	4.525640000000000327e+03	4.574520000000000437e+03	7.609039999999999964e+03	3.690000000000000000e+03	1.570887999999999920e+04	1.430173999999999978e+04	5.289420000000000073e+03	2.840059999999999945e+03	1.188779000000000087e+04	9.371340000000000146e+03	3.380809999999999945e+03	4.920939999999999600e+03	2.098102999999999884e+04	9.277760000000000218e+03	2.954250000000000000e+03	9.575350000000000364e+03	9.422340000000000146e+03	1.469848999999999978e+04	1.114882999999999993e+04	1.055029000000000087e+04	9.103110000000000582e+03	1.630100000000000000e+04	9.383879999999999200e+03	1.543075000000000000e+04	1.530718000000000029e+04	1.717341999999999825e+04	1.090760000000000036e+04	9.170030000000000655e+03	1.052925000000000000e+04	1.098584000000000015e+04	1.157461000000000058e+04	1.097804000000000087e+04	1.383168000000000029e+04	1.204160000000000036e+04	1.002438999999999942e+04	9.588170000000000073e+03	1.296929999999999927e+04	1.160739999999999964e+04	1.296929999999999927e+04	1.089417000000000007e+04	1.530718000000000029e+04	2.365452000000000044e+04	1.114882999999999993e+04	9.783469999999999345e+03	9.575350000000000364e+03	1.097804000000000087e+04	1.544028000000000065e+04	1.562786000000000058e+04	2.166958000000000175e+04
1.326795000000000073e+04	1.117277000000000044e+04	7.791640000000000327e+03	8.481129999999999200e+03	7.826300000000000182e+03	1.427642000000000007e+04	1.317303000000000065e+04	1.203687000000000080e+04	8.643729999999999563e+03	1.114378000000000065e+04	9.477270000000000437e+03	9.888430000000000291e+03	7.814779999999999745e+03	1.850152999999999884e+04	9.424389999999999418e+03	9.048239999999999782e+03	3.575659999999999854e+03	3.998679999999999836e+03	1.460886000000000058e+04	4.521079999999999927e+03	9.035270000000000437e+03	5.147119999999999891e+03	1.626452000000000044e+04	6.025649999999999636e+03	1.537463999999999942e+04	1.524759000000000015e+04	1.714495999999999913e+04	4.327600000000000364e+03	5.340810000000000400e+03	9.027549999999999272e+03	9.860610000000000582e+03	1.079906999999999971e+04	9.816180000000000291e+03	1.370161000000000058e+04	1.149436000000000058e+04	8.100810000000000400e+03	7.171109999999999673e+03	1.274105999999999949e+04	4.910109999999999673e+03	1.274105999999999949e+04	4.310510000000000218e+03	1.524759000000000015e+04	2.324620999999999913e+04	4.521079999999999927e+03	3.649360000000000127e+03	3.575659999999999854e+03	9.816180000000000291e+03	1.539384000000000015e+04	1.558304999999999927e+04	2.142381000000000131e+04
1.217664999999999964e+04	1.003839999999999964e+04	6.760770000000000437e+03	7.734439999999999600e+03	6.737119999999999891e+03	1.405629999999999927e+04	1.288026000000000022e+04	1.090904000000000087e+04	7.508050000000000182e+03	1.074043000000000029e+04	8.883420000000000073e+03	8.751370000000000800e+03	6.810979999999999563e+03	1.852518000000000029e+04	8.822280000000000655e+03	7.910229999999999563e+03	4.254170000000000073e+03	4.460170000000000073e+03	1.416353000000000065e+04	5.508579999999999927e+03	8.707770000000000437e+03	5.189510000000000218e+03	1.583267000000000007e+04	5.961659999999999854e+03	1.493469000000000051e+04	1.480647999999999956e+04	1.672179999999999927e+04	5.289220000000000255e+03	5.360100000000000364e+03	8.697209999999999127e+03	9.488530000000000655e+03	1.039221999999999935e+04	9.449360000000000582e+03	1.324847999999999956e+04	1.106594000000000051e+04	7.816520000000000437e+03	6.947010000000000218e+03	1.228648999999999978e+04	5.937050000000000182e+03	1.228648999999999978e+04	5.273850000000000364e+03	1.480647999999999956e+04	2.293359999999999854e+04	5.508579999999999927e+03	4.390220000000000255e+03	4.254170000000000073e+03	9.449360000000000582e+03	1.495257999999999993e+04	1.514403000000000065e+04	2.107281000000000131e+04
5.571970000000000255e+03	3.745690000000000055e+03	4.887079999999999927e+03	8.062859999999999673e+03	3.910800000000000182e+03	1.622862999999999920e+04	1.480680999999999949e+04	4.441590000000000146e+03	2.620840000000000146e+03	1.239286000000000058e+04	9.846750000000000000e+03	2.722139999999999873e+03	5.258359999999999673e+03	2.156709000000000015e+04	9.751540000000000873e+03	2.570750000000000000e+03	1.048278000000000065e+04	1.031505999999999949e+04	1.507587999999999920e+04	1.206327000000000044e+04	1.116677000000000044e+04	9.937090000000000146e+03	1.664991999999999825e+04	1.017712999999999920e+04	1.579345999999999913e+04	1.567203000000000065e+04	1.751106999999999971e+04	1.182203000000000065e+04	9.995850000000000364e+03	1.114495000000000073e+04	1.155247999999999956e+04	1.209003000000000065e+04	1.154868000000000029e+04	1.422780999999999949e+04	1.252110000000000036e+04	1.069214999999999964e+04	1.030875000000000000e+04	1.339270000000000073e+04	1.252131999999999971e+04	1.339270000000000073e+04	1.180861000000000058e+04	1.567203000000000065e+04	2.398679000000000087e+04	1.206327000000000044e+04	1.069304999999999927e+04	1.048278000000000065e+04	1.154868000000000029e+04	1.580164999999999964e+04	1.598648999999999978e+04	2.199443000000000029e+04
1.592332999999999993e+04	1.379062000000000080e+04	1.000371999999999935e+04	1.002586000000000058e+04	1.019369000000000051e+04	1.442929999999999927e+04	1.352406999999999971e+04	1.467170999999999913e+04	1.118619000000000051e+04	1.181465999999999985e+04	1.064338999999999942e+04	1.249312000000000080e+04	9.960219999999999345e+03	1.800481999999999971e+04	1.061109000000000015e+04	1.161362999999999920e+04	2.534590000000000146e+03	3.432309999999999945e+03	1.528153000000000065e+04	2.154360000000000127e+03	9.628809999999999491e+03	5.314270000000000437e+03	1.687358000000000175e+04	6.293260000000000218e+03	1.601915999999999985e+04	1.589729000000000087e+04	1.771875000000000000e+04	2.073199999999999818e+03	5.525560000000000400e+03	9.627879999999999200e+03	1.051264999999999964e+04	1.149072999999999956e+04	1.045838999999999942e+04	1.441289999999999964e+04	1.221054999999999927e+04	8.656139999999999418e+03	7.667000000000000000e+03	1.348007999999999993e+04	2.396969999999999800e+03	1.348007999999999993e+04	2.052329999999999927e+03	1.589729000000000087e+04	2.348259000000000015e+04	2.154360000000000127e+03	2.373730000000000018e+03	2.534590000000000146e+03	1.045838999999999942e+04	1.604104000000000087e+04	1.622139999999999964e+04	2.176988000000000102e+04
9.602040000000000873e+03	6.596779999999999745e+03	3.907989999999999782e+03	4.260770000000000437e+03	4.360100000000000364e+03	1.069338999999999942e+04	9.302540000000000873e+03	7.405180000000000291e+03	5.268689999999999600e+03	7.292220000000000255e+03	5.239539999999999964e+03	6.095899999999999636e+03	3.797219999999999800e+03	1.623864999999999964e+04	5.169640000000000327e+03	5.470250000000000000e+03	1.214762999999999920e+04	1.140720000000000073e+04	8.544520000000000437e+03	1.425225000000000000e+04	7.553170000000000073e+03	9.754850000000000364e+03	9.829639999999999418e+03	9.218209999999999127e+03	9.110549999999999272e+03	9.011329999999999927e+03	1.058367000000000007e+04	1.395418000000000029e+04	9.645299999999999272e+03	7.529350000000000364e+03	7.279729999999999563e+03	7.158029999999999745e+03	7.319289999999999964e+03	7.911489999999999782e+03	7.154989999999999782e+03	7.835569999999999709e+03	8.257280000000000655e+03	7.392859999999999673e+03	1.481455999999999949e+04	7.392859999999999673e+03	1.395230999999999949e+04	9.011329999999999927e+03	1.685484999999999854e+04	1.425225000000000000e+04	1.244251000000000022e+04	1.214762999999999920e+04	7.319289999999999964e+03	9.109719999999999345e+03	9.264920000000000073e+03	1.486528000000000065e+04
1.527286000000000058e+04	1.268643000000000029e+04	1.033484000000000015e+04	8.951170000000000073e+03	1.095950000000000000e+04	9.806100000000000364e+03	8.995309999999999491e+03	1.325876000000000022e+04	1.189331999999999971e+04	8.559469999999999345e+03	8.462469999999999345e+03	1.250779999999999927e+04	1.011775000000000000e+04	1.436938999999999942e+04	8.471639999999999418e+03	1.204357999999999993e+04	1.697250999999999840e+04	1.607707999999999993e+04	6.851689999999999600e+03	1.903618000000000029e+04	1.027265999999999985e+04	1.411835000000000036e+04	6.963909999999999854e+03	1.327547999999999956e+04	6.835869999999999891e+03	6.828239999999999782e+03	7.223710000000000036e+03	1.874713999999999942e+04	1.394221999999999935e+04	1.025904999999999927e+04	9.499969999999999345e+03	8.712430000000000291e+03	9.562549999999999272e+03	6.974220000000000255e+03	8.160689999999999600e+03	1.107207999999999993e+04	1.192607999999999993e+04	7.314939999999999600e+03	1.958406000000000131e+04	7.314939999999999600e+03	1.875131000000000131e+04	6.828239999999999782e+03	1.205250000000000000e+04	1.903618000000000029e+04	1.726124000000000160e+04	1.697250999999999840e+04	9.562549999999999272e+03	6.816149999999999636e+03	6.840250000000000000e+03	1.025543000000000029e+04
1.104454999999999927e+04	8.151329999999999927e+03	5.478359999999999673e+03	4.956890000000000327e+03	6.036020000000000437e+03	9.924030000000000655e+03	8.615629999999999200e+03	8.886010000000000218e+03	6.992819999999999709e+03	6.922479999999999563e+03	5.378729999999999563e+03	7.758340000000000146e+03	5.305960000000000036e+03	1.537634000000000015e+04	5.333960000000000036e+03	7.181859999999999673e+03	1.314139999999999964e+04	1.233637000000000080e+04	7.477699999999999818e+03	1.525353000000000065e+04	7.681199999999999818e+03	1.054519000000000051e+04	8.588100000000000364e+03	9.885360000000000582e+03	7.952500000000000000e+03	7.866880000000000109e+03	9.277559999999999491e+03	1.495581999999999971e+04	1.040920999999999913e+04	7.659560000000000400e+03	7.219600000000000364e+03	6.868930000000000291e+03	7.269619999999999891e+03	6.976010000000000218e+03	6.692880000000000109e+03	8.159890000000000327e+03	8.754069999999999709e+03	6.636890000000000327e+03	1.581582999999999993e+04	6.636890000000000327e+03	1.495601000000000022e+04	7.866880000000000109e+03	1.539456999999999971e+04	1.525353000000000065e+04	1.343753000000000065e+04	1.314139999999999964e+04	7.269619999999999891e+03	7.947739999999999782e+03	8.084270000000000437e+03	1.342068000000000029e+04
4.665369999999999891e+03	3.184349999999999909e+03	5.512859999999999673e+03	8.755719999999999345e+03	4.494899999999999636e+03	1.694547000000000116e+04	1.551459000000000015e+04	3.727210000000000036e+03	2.908239999999999782e+03	1.310617000000000007e+04	1.054614999999999964e+04	2.438409999999999854e+03	5.895380000000000109e+03	2.232954000000000087e+04	1.045012000000000080e+04	2.685699999999999818e+03	1.142128000000000065e+04	1.125777000000000044e+04	1.567909000000000015e+04	1.298412999999999920e+04	1.196512000000000080e+04	1.086498999999999978e+04	1.722533000000000175e+04	1.108612000000000080e+04	1.638254999999999927e+04	1.626321999999999935e+04	1.807499000000000160e+04	1.274570000000000073e+04	1.092030999999999949e+04	1.194279999999999927e+04	1.231426000000000022e+04	1.281210000000000036e+04	1.231338999999999942e+04	1.484886000000000058e+04	1.321418000000000029e+04	1.152623999999999978e+04	1.117688999999999942e+04	1.403847999999999956e+04	1.343661000000000058e+04	1.403847999999999956e+04	1.273203000000000065e+04	1.626321999999999935e+04	2.453659000000000015e+04	1.298412999999999920e+04	1.162968000000000029e+04	1.142128000000000065e+04	1.231338999999999942e+04	1.638959000000000015e+04	1.657165999999999985e+04	2.254004000000000087e+04
1.549511000000000058e+04	1.293538999999999942e+04	1.064007999999999993e+04	9.260610000000000582e+03	1.125915999999999985e+04	9.974780000000000655e+03	9.195889999999999418e+03	1.349473999999999978e+04	1.217793000000000029e+04	8.816069999999999709e+03	8.759500000000000000e+03	1.277481999999999971e+04	1.042472999999999956e+04	1.446146999999999935e+04	8.769690000000000509e+03	1.232271999999999935e+04	1.727391999999999825e+04	1.637695999999999913e+04	7.021869999999999891e+03	1.933552999999999884e+04	1.055156999999999971e+04	1.441587000000000080e+04	7.067100000000000364e+03	1.356952000000000044e+04	6.975949999999999818e+03	6.973470000000000255e+03	7.290699999999999818e+03	1.904681999999999971e+04	1.423896999999999935e+04	1.053822999999999956e+04	9.772590000000000146e+03	8.975139999999999418e+03	9.835280000000000655e+03	7.176680000000000291e+03	8.414100000000000364e+03	1.135765999999999985e+04	1.221668000000000029e+04	7.544989999999999782e+03	1.988283000000000175e+04	7.544989999999999782e+03	1.905108000000000175e+04	6.973470000000000255e+03	1.197256999999999971e+04	1.933552999999999884e+04	1.756234000000000015e+04	1.727391999999999825e+04	9.835280000000000655e+03	6.955529999999999745e+03	6.971819999999999709e+03	1.020020000000000073e+04
1.533070999999999913e+04	1.275118000000000029e+04	1.041415999999999985e+04	9.031399999999999636e+03	1.103739999999999964e+04	9.848670000000000073e+03	9.046270000000000437e+03	1.332013999999999942e+04	1.196732999999999993e+04	8.625360000000000582e+03	8.539270000000000437e+03	1.257725000000000000e+04	1.019751000000000022e+04	1.439207999999999993e+04	8.548719999999999345e+03	1.211617000000000007e+04	1.705054999999999927e+04	1.615470000000000073e+04	6.894369999999999891e+03	1.911366999999999825e+04	1.034459000000000015e+04	1.419532999999999993e+04	6.988899999999999636e+03	1.335151000000000022e+04	6.870569999999999709e+03	6.864300000000000182e+03	7.239239999999999782e+03	1.882470999999999913e+04	1.401898999999999978e+04	1.033104999999999927e+04	9.570190000000000509e+03	8.779959999999999127e+03	9.632799999999999272e+03	7.025510000000000218e+03	8.225700000000000728e+03	1.114580999999999949e+04	1.200118000000000029e+04	7.373640000000000327e+03	1.966138999999999942e+04	7.373640000000000327e+03	1.882890999999999985e+04	6.864300000000000182e+03	1.203040999999999985e+04	1.911366999999999825e+04	1.733918999999999869e+04	1.705054999999999927e+04	9.632799999999999272e+03	6.850659999999999854e+03	6.872699999999999818e+03	1.023957999999999993e+04
4.955010000000000218e+03	2.099920000000000073e+03	3.861039999999999964e+03	7.122659999999999854e+03	2.845219999999999800e+03	1.526815999999999985e+04	1.382420999999999913e+04	3.090550000000000182e+03	9.565399999999999636e+02	1.145131999999999971e+04	8.890989999999999782e+03	7.695900000000000318e+02	4.243369999999999891e+03	2.075108000000000175e+04	8.794590000000000146e+03	5.004800000000000182e+02	1.140973999999999978e+04	1.106328000000000065e+04	1.376995999999999913e+04	1.320735000000000036e+04	1.058614999999999964e+04	1.027845999999999913e+04	1.526337999999999920e+04	1.030281999999999971e+04	1.444607999999999993e+04	1.433078000000000065e+04	1.609246999999999935e+04	1.294151000000000022e+04	1.029075000000000000e+04	1.056239999999999964e+04	1.080681999999999971e+04	1.118362000000000080e+04	1.081514999999999964e+04	1.297659000000000015e+04	1.150776000000000022e+04	1.029742000000000007e+04	1.012061000000000058e+04	1.221997999999999956e+04	1.370967000000000007e+04	1.221997999999999956e+04	1.293086000000000058e+04	1.433078000000000065e+04	2.251886999999999898e+04	1.320735000000000036e+04	1.165520000000000073e+04	1.140973999999999978e+04	1.081514999999999964e+04	1.445119000000000051e+04	1.462795000000000073e+04	2.052015000000000146e+04
1.275120000000000073e+04	1.004446999999999935e+04	7.697890000000000327e+03	6.749130000000000109e+03	8.268889999999999418e+03	9.819719999999999345e+03	8.697000000000000000e+03	1.067405999999999949e+04	9.163500000000000000e+03	7.545369999999999891e+03	6.690550000000000182e+03	9.803420000000000073e+03	7.509079999999999927e+03	1.498200000000000000e+04	6.673220000000000255e+03	9.316409999999999854e+03	1.494776000000000022e+04	1.409679000000000087e+04	7.026880000000000109e+03	1.704845000000000073e+04	8.817739999999999782e+03	1.221319000000000051e+04	7.749020000000000437e+03	1.145882999999999993e+04	7.305789999999999964e+03	7.250489999999999782e+03	8.281739999999999782e+03	1.675327999999999884e+04	1.205682999999999993e+04	8.799530000000000655e+03	8.183119999999999891e+03	7.594640000000000327e+03	8.241360000000000582e+03	6.787430000000000291e+03	7.217590000000000146e+03	9.469860000000000582e+03	1.020472999999999956e+04	6.758979999999999563e+03	1.760672000000000116e+04	6.758979999999999563e+03	1.675525000000000000e+04	7.250489999999999782e+03	1.396262000000000080e+04	1.704845000000000073e+04	1.524212999999999920e+04	1.494776000000000022e+04	8.241360000000000582e+03	7.294020000000000437e+03	7.387710000000000036e+03	1.204475000000000000e+04
2.102490999999999985e+04	2.090034999999999854e+04	2.308545000000000073e+04	2.371034999999999854e+04	2.300490999999999985e+04	2.641197000000000116e+04	2.562420000000000073e+04	2.054515000000000146e+04	2.252263999999999942e+04	2.492572999999999956e+04	2.405997999999999956e+04	2.181602999999999884e+04	2.312640999999999985e+04	3.049475999999999840e+04	2.402984999999999854e+04	2.226038999999999942e+04	3.175722000000000116e+04	3.101379999999999927e+04	2.346331999999999971e+04	3.385898000000000320e+04	2.625711000000000058e+04	2.930043000000000029e+04	2.332074000000000160e+04	2.866602000000000044e+04	2.336581000000000131e+04	2.337615000000000146e+04	2.333384000000000015e+04	3.356113999999999942e+04	2.917308000000000175e+04	2.623825000000000000e+04	2.563140999999999985e+04	2.500818000000000029e+04	2.568988999999999942e+04	2.360290999999999985e+04	2.456568999999999869e+04	2.686152999999999884e+04	2.751940999999999985e+04	2.387779999999999927e+04	3.442069999999999709e+04	2.387779999999999927e+04	3.355888999999999942e+04	2.337615000000000146e+04	2.574363999999999942e+04	3.385898000000000320e+04	3.205177000000000044e+04	3.175722000000000116e+04	2.568988999999999942e+04	2.334374000000000160e+04	2.333734000000000015e+04	2.465147000000000116e+04
2.785034999999999854e+04	2.508854999999999927e+04	2.146990000000000146e+04	1.880702000000000044e+04	2.235693999999999869e+04	1.284427000000000044e+04	1.359912000000000080e+04	2.576388000000000102e+04	2.374645000000000073e+04	1.543875000000000000e+04	1.732961000000000058e+04	2.468986999999999898e+04	2.114104000000000087e+04	1.214312999999999920e+04	1.740259999999999854e+04	2.401797000000000116e+04	2.463827999999999884e+04	2.370263000000000102e+04	1.197488999999999942e+04	2.625156000000000131e+04	1.758013000000000102e+04	2.181761000000000058e+04	1.031631999999999971e+04	2.084081999999999971e+04	1.120692000000000007e+04	1.133432999999999993e+04	9.439450000000000728e+03	2.602804000000000087e+04	2.160559000000000015e+04	1.758531999999999971e+04	1.673027000000000044e+04	1.578237000000000080e+04	1.677733000000000175e+04	1.288685000000000036e+04	1.508696999999999935e+04	1.854131000000000131e+04	1.951538999999999942e+04	1.384904000000000087e+04	2.668175999999999840e+04	1.384904000000000087e+04	2.604124000000000160e+04	1.133432999999999993e+04	4.499289999999999964e+03	2.625156000000000131e+04	2.486031000000000131e+04	2.463827999999999884e+04	1.677733000000000175e+04	1.118804999999999927e+04	1.099822999999999956e+04	5.540600000000000364e+03
2.456240000000000146e+04	2.220109000000000015e+04	1.982849000000000160e+04	1.788795999999999913e+04	2.052922999999999956e+04	1.453764999999999964e+04	1.469775000000000000e+04	2.267968000000000029e+04	2.152959000000000015e+04	1.574271999999999935e+04	1.684815999999999985e+04	2.211406999999999971e+04	1.957327000000000044e+04	1.604715999999999985e+04	1.689386000000000058e+04	2.167911000000000058e+04	2.513945000000000073e+04	2.419284999999999854e+04	1.246890999999999985e+04	2.703241999999999825e+04	1.789636999999999898e+04	2.219559999999999854e+04	1.117092000000000007e+04	2.124043999999999869e+04	1.184770999999999913e+04	1.194740999999999985e+04	1.055012999999999920e+04	2.676913999999999942e+04	2.199231999999999971e+04	1.789286999999999898e+04	1.700797000000000116e+04	1.603679000000000087e+04	1.706700000000000000e+04	1.322285000000000036e+04	1.532313999999999942e+04	1.885193000000000029e+04	1.983009999999999854e+04	1.408004999999999927e+04	2.753434999999999854e+04	1.408004999999999927e+04	2.677811999999999898e+04	1.194740999999999985e+04	9.281850000000000364e+03	2.703241999999999825e+04	2.540300000000000000e+04	2.513945000000000073e+04	1.706700000000000000e+04	1.182206999999999971e+04	1.167855999999999949e+04	8.995510000000000218e+03
2.496711000000000058e+04	2.257066999999999825e+04	2.008900000000000000e+04	1.807854000000000087e+04	2.080772000000000116e+04	1.447570999999999913e+04	1.469004000000000087e+04	2.306565999999999985e+04	2.184329000000000087e+04	1.581332999999999993e+04	1.699513000000000102e+04	2.245849000000000160e+04	1.982663999999999942e+04	1.579747999999999956e+04	1.704349000000000160e+04	2.200322000000000116e+04	2.523040999999999985e+04	2.428229999999999927e+04	1.249537999999999920e+04	2.710316999999999825e+04	1.797809000000000015e+04	2.228902999999999884e+04	1.114923999999999978e+04	2.132875999999999840e+04	1.185394000000000051e+04	1.195731999999999971e+04	1.049642000000000007e+04	2.684281999999999971e+04	2.208433000000000175e+04	1.797534999999999854e+04	1.708847000000000116e+04	1.611369000000000051e+04	1.714675999999999840e+04	1.327106999999999971e+04	1.539703000000000065e+04	1.893863999999999942e+04	1.992059999999999854e+04	1.414517000000000007e+04	2.759983000000000175e+04	1.414517000000000007e+04	2.685218999999999869e+04	1.195731999999999971e+04	8.903090000000000146e+03	2.710316999999999825e+04	2.549095999999999913e+04	2.523040999999999985e+04	1.714675999999999840e+04	1.182861000000000058e+04	1.167918000000000029e+04	8.714389999999999418e+03
2.168913000000000102e+04	2.017397000000000116e+04	1.989502999999999884e+04	1.918300000000000000e+04	2.024706999999999971e+04	1.915456000000000131e+04	1.874318999999999869e+04	2.029840000000000146e+04	2.057458000000000175e+04	1.880818999999999869e+04	1.884447999999999956e+04	2.056718999999999869e+04	1.977472000000000116e+04	2.227977000000000044e+04	1.885027000000000044e+04	2.053009999999999854e+04	2.732159999999999854e+04	2.643952000000000044e+04	1.639113999999999942e+04	2.940045000000000073e+04	2.063659999999999854e+04	2.449538999999999942e+04	1.574080999999999949e+04	2.366286999999999898e+04	1.605704000000000087e+04	1.610679000000000087e+04	1.549543000000000029e+04	2.910920999999999913e+04	2.432240000000000146e+04	2.062404000000000087e+04	1.983770000000000073e+04	1.899883000000000175e+04	1.990068000000000029e+04	1.681802000000000044e+04	1.839140000000000146e+04	2.145572000000000116e+04	2.231583000000000175e+04	1.738459000000000015e+04	2.995190999999999985e+04	1.738459000000000015e+04	2.911270000000000073e+04	1.610679000000000087e+04	1.662752999999999884e+04	2.940045000000000073e+04	2.761284000000000015e+04	2.732159999999999854e+04	1.990068000000000029e+04	1.603161000000000058e+04	1.596589999999999964e+04	1.579948999999999978e+04
2.456240000000000146e+04	2.220109000000000015e+04	1.982849000000000160e+04	1.788795999999999913e+04	2.052922999999999956e+04	1.453764999999999964e+04	1.469775000000000000e+04	2.267968000000000029e+04	2.152959000000000015e+04	1.574271999999999935e+04	1.684815999999999985e+04	2.211406999999999971e+04	1.957327000000000044e+04	1.604715999999999985e+04	1.689386000000000058e+04	2.167911000000000058e+04	2.513945000000000073e+04	2.419284999999999854e+04	1.246890999999999985e+04	2.703241999999999825e+04	1.789636999999999898e+04	2.219559999999999854e+04	1.117092000000000007e+04	2.124043999999999869e+04	1.184770999999999913e+04	1.194740999999999985e+04	1.055012999999999920e+04	2.676913999999999942e+04	2.199231999999999971e+04	1.789286999999999898e+04	1.700797000000000116e+04	1.603679000000000087e+04	1.706700000000000000e+04	1.322285000000000036e+04	1.532313999999999942e+04	1.885193000000000029e+04	1.983009999999999854e+04	1.408004999999999927e+04	2.753434999999999854e+04	1.408004999999999927e+04	2.677811999999999898e+04	1.194740999999999985e+04	9.281850000000000364e+03	2.703241999999999825e+04	2.540300000000000000e+04	2.513945000000000073e+04	1.706700000000000000e+04	1.182206999999999971e+04	1.167855999999999949e+04	8.995510000000000218e+03
2.186302000000000044e+04	2.072415000000000146e+04	2.116699000000000160e+04	2.083297999999999956e+04	2.139854999999999927e+04	2.155686000000000058e+04	2.104522000000000116e+04	2.070968000000000029e+04	2.149409999999999854e+04	2.090465000000000146e+04	2.068750000000000000e+04	2.128036999999999898e+04	2.109179000000000087e+04	2.491577999999999884e+04	2.068309999999999854e+04	2.138454000000000087e+04	2.903993999999999869e+04	2.818833000000000175e+04	1.872143999999999869e+04	3.114108000000000175e+04	2.261629999999999927e+04	2.628986999999999898e+04	1.819836000000000058e+04	2.550381999999999971e+04	1.844693999999999869e+04	1.848675999999999840e+04	1.801611000000000058e+04	3.084593999999999869e+04	2.612779000000000087e+04	2.260186000000000058e+04	2.185636999999999898e+04	2.106758000000000175e+04	2.191881999999999971e+04	1.907516999999999825e+04	2.049872000000000116e+04	2.338499000000000160e+04	2.419836999999999898e+04	1.956820999999999913e+04	3.169918999999999869e+04	1.956820999999999913e+04	3.084788999999999942e+04	1.848675999999999840e+04	1.939402000000000044e+04	3.114108000000000175e+04	2.933447000000000116e+04	2.903993999999999869e+04	2.191881999999999971e+04	1.842215000000000146e+04	1.837140000000000146e+04	1.853450999999999840e+04
1.774441999999999825e+04	1.895718000000000029e+04	2.303565000000000146e+04	2.479729999999999927e+04	2.257077000000000044e+04	2.985302000000000044e+04	2.874338000000000102e+04	1.822102000000000044e+04	2.142156000000000131e+04	2.735934000000000015e+04	2.573927000000000044e+04	2.018972999999999956e+04	2.321815000000000146e+04	3.478141999999999825e+04	2.567943000000000029e+04	2.100247999999999956e+04	3.191815000000000146e+04	3.136933000000000175e+04	2.698652999999999884e+04	3.388568000000000029e+04	2.806913999999999942e+04	3.002761999999999898e+04	2.737252999999999884e+04	2.964331000000000131e+04	2.713588000000000102e+04	2.710543000000000029e+04	2.765659000000000015e+04	3.360243000000000029e+04	2.995600999999999840e+04	2.804615000000000146e+04	2.767650000000000000e+04	2.732838999999999942e+04	2.772443000000000029e+04	2.682831000000000131e+04	2.709338000000000102e+04	2.840406000000000131e+04	2.880063999999999942e+04	2.678950000000000000e+04	3.441877999999999884e+04	2.678950000000000000e+04	3.359473999999999796e+04	2.710543000000000029e+04	3.157611999999999898e+04	3.388568000000000029e+04	3.219277000000000044e+04	3.191815000000000146e+04	2.772443000000000029e+04	2.711941999999999825e+04	2.717370999999999913e+04	3.011188000000000102e+04
2.708765999999999985e+04	2.440808000000000175e+04	2.105988000000000102e+04	1.854522999999999956e+04	2.190936999999999898e+04	1.315171999999999935e+04	1.376501000000000022e+04	2.504052000000000044e+04	2.321609999999999854e+04	1.543348999999999978e+04	1.715681999999999971e+04	2.408045000000000073e+04	2.074588999999999942e+04	1.304387999999999920e+04	1.722406999999999971e+04	2.346050999999999840e+04	2.476763000000000102e+04	2.382363999999999942e+04	1.195069000000000051e+04	2.645836999999999898e+04	1.760609000000000015e+04	2.189811000000000058e+04	1.033851000000000022e+04	2.091902000000000044e+04	1.120018000000000029e+04	1.132395999999999913e+04	9.499219999999999345e+03	2.622395000000000073e+04	2.168663999999999942e+04	1.760918999999999869e+04	1.673636000000000058e+04	1.576981999999999971e+04	1.678699000000000160e+04	1.284364999999999964e+04	1.505939999999999964e+04	1.857638999999999942e+04	1.956106999999999971e+04	1.379884000000000015e+04	2.690834000000000015e+04	1.379884000000000015e+04	2.623616999999999825e+04	1.132395999999999913e+04	5.503279999999999745e+03	2.645836999999999898e+04	2.500113999999999942e+04	2.476763000000000102e+04	1.678699000000000160e+04	1.117902000000000044e+04	1.099577000000000044e+04	6.117260000000000218e+03
2.157584000000000015e+04	2.095936000000000058e+04	2.233688000000000102e+04	2.251086999999999898e+04	2.240461999999999898e+04	2.428213000000000102e+04	2.362431000000000131e+04	2.076359999999999854e+04	2.219329000000000087e+04	2.319013999999999942e+04	2.262759000000000015e+04	2.171438000000000102e+04	2.232283000000000175e+04	2.801925999999999840e+04	2.260947000000000116e+04	2.200102999999999884e+04	3.069504999999999927e+04	2.989513999999999942e+04	2.137016999999999825e+04	3.280750000000000000e+04	2.471427000000000044e+04	2.808202999999999884e+04	2.104258000000000175e+04	2.737040000000000146e+04	2.118656999999999971e+04	2.121122000000000116e+04	2.096054000000000087e+04	3.250950000000000000e+04	2.793711999999999898e+04	2.469740000000000146e+04	2.401938999999999942e+04	2.331186999999999898e+04	2.408022000000000116e+04	2.161383000000000175e+04	2.280529000000000087e+04	2.540211999999999898e+04	2.613950000000000000e+04	2.199558000000000175e+04	3.337018000000000029e+04	2.199558000000000175e+04	3.250927000000000044e+04	2.121122000000000116e+04	2.285075000000000000e+04	3.280750000000000000e+04	3.099122000000000116e+04	3.069504999999999927e+04	2.408022000000000116e+04	2.116302999999999884e+04	2.113513999999999942e+04	2.188127000000000044e+04
1.932645000000000073e+04	2.111456000000000131e+04	2.577579000000000087e+04	2.788211000000000058e+04	2.518195000000000073e+04	3.353658999999999651e+04	3.235727999999999884e+04	2.024915000000000146e+04	2.381345000000000073e+04	3.080431999999999971e+04	2.899118000000000029e+04	2.241822000000000116e+04	2.600424000000000160e+04	3.862609999999999854e+04	2.892347000000000116e+04	2.334840000000000146e+04	3.448888999999999942e+04	3.402715000000000146e+04	3.073438000000000102e+04	3.636343000000000029e+04	3.130927000000000044e+04	3.285376000000000204e+04	3.124195999999999913e+04	3.256802999999999884e+04	3.094211000000000058e+04	3.090224000000000160e+04	3.158370000000000073e+04	3.609151999999999680e+04	3.280404000000000087e+04	3.128545000000000073e+04	3.099806000000000131e+04	3.074052000000000044e+04	3.104172999999999956e+04	3.050265999999999985e+04	3.057100999999999840e+04	3.154952999999999884e+04	3.184970999999999913e+04	3.038081000000000131e+04	3.687483999999999651e+04	3.038081000000000131e+04	3.608180999999999767e+04	3.090224000000000160e+04	3.576594000000000233e+04	3.636343000000000029e+04	3.474991999999999825e+04	3.448888999999999942e+04	3.104172999999999956e+04	3.092725000000000000e+04	3.099529999999999927e+04	3.424568000000000029e+04
2.840595999999999913e+04	2.560013000000000102e+04	2.182993000000000029e+04	1.908568000000000029e+04	2.273729999999999927e+04	1.279687999999999920e+04	1.363753000000000065e+04	2.629927000000000044e+04	2.417288999999999942e+04	1.557421999999999935e+04	1.755959000000000015e+04	2.516090999999999985e+04	2.149300999999999840e+04	1.169361000000000058e+04	1.763577999999999884e+04	2.445979999999999927e+04	2.466200999999999840e+04	2.373347999999999956e+04	1.214303000000000065e+04	2.622338999999999942e+04	1.768731999999999971e+04	2.187811000000000058e+04	1.047095999999999913e+04	2.090522000000000116e+04	1.137073999999999978e+04	1.149925000000000000e+04	9.580950000000000728e+03	2.600718000000000029e+04	2.166625000000000000e+04	1.769379000000000087e+04	1.685306999999999971e+04	1.592076000000000022e+04	1.689772999999999956e+04	1.306004000000000087e+04	1.523790999999999985e+04	1.863945999999999913e+04	1.960386999999999898e+04	1.402048999999999978e+04	2.664031999999999971e+04	1.402048999999999978e+04	2.602097000000000116e+04	1.149925000000000000e+04	4.084659999999999854e+03	2.622338999999999942e+04	2.487638999999999942e+04	2.466200999999999840e+04	1.689772999999999956e+04	1.135343000000000029e+04	1.116129999999999927e+04	5.423250000000000000e+03
2.134793999999999869e+04	2.349345000000000073e+04	2.848211999999999898e+04	3.080484000000000015e+04	2.780636999999999898e+04	3.683933000000000175e+04	3.561645999999999913e+04	2.255843999999999869e+04	2.630516999999999825e+04	3.395472000000000116e+04	3.202011000000000058e+04	2.482027999999999884e+04	2.873966999999999825e+04	4.202730999999999767e+04	3.194747000000000116e+04	2.581568999999999869e+04	3.699241000000000349e+04	3.659816999999999825e+04	3.409043000000000029e+04	3.878406999999999971e+04	3.431527999999999884e+04	3.555580999999999767e+04	3.467769000000000233e+04	3.534298000000000320e+04	3.433654000000000087e+04	3.429050000000000000e+04	3.505694999999999709e+04	3.852259999999999854e+04	3.552223999999999796e+04	3.429104000000000087e+04	3.406244999999999709e+04	3.386873999999999796e+04	3.410291000000000349e+04	3.381022000000000116e+04	3.374494000000000233e+04	3.448783999999999651e+04	3.471809999999999854e+04	3.363287000000000262e+04	3.927561000000000058e+04	3.363287000000000262e+04	3.851144000000000233e+04	3.429050000000000000e+04	3.940787000000000262e+04	3.878406999999999971e+04	3.724143000000000029e+04	3.699241000000000349e+04	3.410291000000000349e+04	3.432279000000000087e+04	3.439983000000000175e+04	3.785180999999999767e+04
2.134736999999999898e+04	2.084606999999999971e+04	2.242477999999999884e+04	2.271347999999999956e+04	2.245561999999999898e+04	2.473195999999999913e+04	2.403847000000000116e+04	2.061172999999999956e+04	2.217695000000000073e+04	2.353340000000000146e+04	2.289056999999999971e+04	2.164152999999999884e+04	2.242450999999999840e+04	2.856604999999999927e+04	2.286929999999999927e+04	2.196715999999999985e+04	3.087325999999999840e+04	3.008684999999999854e+04	2.180675999999999840e+04	3.298494000000000233e+04	2.500897999999999956e+04	2.829716999999999825e+04	2.152936000000000058e+04	2.760447000000000116e+04	2.164638000000000102e+04	2.166715000000000146e+04	2.147354000000000087e+04	3.268672000000000116e+04	2.815658000000000175e+04	2.499156999999999971e+04	2.433125999999999840e+04	2.364493999999999869e+04	2.439156000000000131e+04	2.202258000000000175e+04	2.315459000000000015e+04	2.567602000000000044e+04	2.639377999999999884e+04	2.237618000000000029e+04	3.354784999999999854e+04	2.237618000000000029e+04	3.268599000000000160e+04	2.166715000000000146e+04	2.351283000000000175e+04	3.298494000000000233e+04	3.116931000000000131e+04	3.087325999999999840e+04	2.439156000000000131e+04	2.162320999999999913e+04	2.160116999999999825e+04	2.250720000000000073e+04
2.197613999999999942e+04	2.102806000000000131e+04	2.181270000000000073e+04	2.165715000000000146e+04	2.198618000000000029e+04	2.272970999999999913e+04	2.217172999999999956e+04	2.094627999999999884e+04	2.197093999999999869e+04	2.193572000000000116e+04	2.160184000000000015e+04	2.165950999999999840e+04	2.175911000000000058e+04	2.620061000000000058e+04	2.159272999999999956e+04	2.183088000000000102e+04	2.987149000000000160e+04	2.903640000000000146e+04	1.986636999999999898e+04	3.197915999999999985e+04	2.358802999999999884e+04	2.716429000000000087e+04	1.940318999999999869e+04	2.640233000000000175e+04	1.961997000000000116e+04	1.965511999999999898e+04	1.925070999999999913e+04	3.168268000000000029e+04	2.700781000000000131e+04	2.357275000000000000e+04	2.284849000000000160e+04	2.208529999999999927e+04	2.291050999999999840e+04	2.018556000000000131e+04	2.153600000000000000e+04	2.433090000000000146e+04	2.512000999999999840e+04	2.064340999999999985e+04	3.253947999999999956e+04	2.064340999999999985e+04	3.168390000000000146e+04	1.965511999999999898e+04	2.075674000000000160e+04	3.197915999999999985e+04	3.016697999999999956e+04	2.987149000000000160e+04	2.291050999999999840e+04	1.959552999999999884e+04	1.955179999999999927e+04	1.987593000000000029e+04
2.148047000000000116e+04	2.020784000000000015e+04	2.041974000000000160e+04	1.997658000000000175e+04	2.068831999999999971e+04	2.052674000000000160e+04	2.003295999999999913e+04	2.024106999999999971e+04	2.085704000000000087e+04	1.993563999999999942e+04	1.977975000000000000e+04	2.071034000000000015e+04	2.033093999999999869e+04	2.385886000000000058e+04	1.977797000000000116e+04	2.076831000000000131e+04	2.817195000000000073e+04	2.731152000000000044e+04	1.770270000000000073e+04	3.026818000000000029e+04	2.167609000000000015e+04	2.539956999999999971e+04	1.715849000000000160e+04	2.460074000000000160e+04	1.741768000000000029e+04	1.745918999999999869e+04	1.696795999999999913e+04	2.997393999999999869e+04	2.523449000000000160e+04	2.166209999999999854e+04	2.090618999999999869e+04	2.010504000000000087e+04	2.096881000000000131e+04	1.807056999999999971e+04	1.952695000000000073e+04	2.245781999999999971e+04	2.328361999999999898e+04	1.857906000000000131e+04	3.082475999999999840e+04	1.857906000000000131e+04	2.997631999999999971e+04	1.745918999999999869e+04	1.836202999999999884e+04	3.026818000000000029e+04	2.846577000000000044e+04	2.817195000000000073e+04	2.096881000000000131e+04	1.739277000000000044e+04	1.733956000000000131e+04	1.748490999999999985e+04
2.746190000000000146e+04	2.476395999999999913e+04	2.135081000000000131e+04	1.879693999999999869e+04	2.220995000000000073e+04	1.323662999999999920e+04	1.389318000000000029e+04	2.540593999999999869e+04	2.353715999999999985e+04	1.561287999999999920e+04	1.738391999999999825e+04	2.442022999999999956e+04	2.103297000000000116e+04	1.293251000000000022e+04	1.745277000000000044e+04	2.378804000000000087e+04	2.491409000000000015e+04	2.397215000000000146e+04	1.213111000000000058e+04	2.658261999999999898e+04	1.777847999999999956e+04	2.205747999999999956e+04	1.050276000000000022e+04	2.107854999999999927e+04	1.137437999999999920e+04	1.149942000000000007e+04	9.650700000000000728e+03	2.635134999999999854e+04	2.184575000000000000e+04	1.778216999999999825e+04	1.691370000000000073e+04	1.595159000000000015e+04	1.696336000000000058e+04	1.303073999999999978e+04	1.524470999999999913e+04	1.874686999999999898e+04	1.972915000000000146e+04	1.398911000000000058e+04	2.702684000000000015e+04	1.398911000000000058e+04	2.636386999999999898e+04	1.149942000000000007e+04	5.336159999999999854e+03	2.658261999999999898e+04	2.514433000000000175e+04	2.491409000000000015e+04	1.696336000000000058e+04	1.135382999999999993e+04	1.116837999999999920e+04	6.097479999999999563e+03
2.404918000000000029e+04	2.190365000000000146e+04	2.009922999999999956e+04	1.848225999999999840e+04	2.071036000000000058e+04	1.605212000000000080e+04	1.604587000000000080e+04	2.228652000000000044e+04	2.153159999999999854e+04	1.681870999999999913e+04	1.762881999999999971e+04	2.195377999999999884e+04	1.987884999999999854e+04	1.802804000000000087e+04	1.766363999999999942e+04	2.162734999999999854e+04	2.608150999999999840e+04	2.514461999999999898e+04	1.373255999999999949e+04	2.804172999999999956e+04	1.891384000000000015e+04	2.314234999999999854e+04	1.260339999999999964e+04	2.221140999999999985e+04	1.318473999999999978e+04	1.327143000000000029e+04	1.208510000000000036e+04	2.776868000000000029e+04	2.294547999999999956e+04	1.890765000000000146e+04	1.803713000000000102e+04	1.708765000000000146e+04	1.809833000000000175e+04	1.440440999999999985e+04	1.639175999999999840e+04	1.984408000000000175e+04	2.080165999999999985e+04	1.519317000000000007e+04	2.856108000000000175e+04	1.519317000000000007e+04	2.777618999999999869e+04	1.327143000000000029e+04	1.149463999999999942e+04	2.804172999999999956e+04	2.635511000000000058e+04	2.608150999999999840e+04	1.809833000000000175e+04	1.315850000000000000e+04	1.303557999999999993e+04	1.106929000000000087e+04
1.732327000000000044e+04	1.795320000000000073e+04	2.135413000000000102e+04	2.273954000000000087e+04	2.102629999999999927e+04	2.712899000000000160e+04	2.609940999999999985e+04	1.736716999999999825e+04	2.011813000000000102e+04	2.490222000000000116e+04	2.349836999999999898e+04	1.907791999999999825e+04	2.148738000000000102e+04	3.186690999999999985e+04	2.344734999999999854e+04	1.975450999999999840e+04	3.027100000000000000e+04	2.964629000000000087e+04	2.421334999999999854e+04	3.230488999999999942e+04	2.581413000000000102e+04	2.815891999999999825e+04	2.446529999999999927e+04	2.768354999999999927e+04	2.429872999999999956e+04	2.427865999999999985e+04	2.468475000000000000e+04	3.201391999999999825e+04	2.806702000000000044e+04	2.579220999999999913e+04	2.534295000000000073e+04	2.490545999999999913e+04	2.539474000000000160e+04	2.413499000000000160e+04	2.460486000000000058e+04	2.624045000000000073e+04	2.672834999999999854e+04	2.418459999999999854e+04	3.285284999999999854e+04	2.418459999999999854e+04	3.200818000000000029e+04	2.427865999999999985e+04	2.830002999999999884e+04	3.230488999999999942e+04	3.055541999999999825e+04	3.027100000000000000e+04	2.539474000000000160e+04	2.428063999999999942e+04	2.431968000000000029e+04	2.690197999999999956e+04
2.477681999999999971e+04	2.239133000000000175e+04	1.994620999999999913e+04	1.796054999999999927e+04	2.065872000000000116e+04	1.445442000000000007e+04	1.464704999999999927e+04	2.288113000000000102e+04	2.168231000000000131e+04	1.573995000000000073e+04	1.689306000000000131e+04	2.228731000000000131e+04	1.968633000000000175e+04	1.585550000000000000e+04	1.694043000000000029e+04	2.183875999999999840e+04	2.515008000000000175e+04	2.420250000000000000e+04	1.243850000000000000e+04	2.703068000000000029e+04	1.790072000000000116e+04	2.220758000000000175e+04	1.111101000000000022e+04	2.124918000000000029e+04	1.180484000000000015e+04	1.190679999999999927e+04	1.047085000000000036e+04	2.676918999999999869e+04	2.200340999999999985e+04	1.789768999999999869e+04	1.701145999999999913e+04	1.603794000000000051e+04	1.707004999999999927e+04	1.320588999999999942e+04	1.532232999999999993e+04	1.885947000000000116e+04	1.984006999999999971e+04	1.407362999999999920e+04	2.752940000000000146e+04	1.407362999999999920e+04	2.677841999999999825e+04	1.190679999999999927e+04	9.018989999999999782e+03	2.703068000000000029e+04	2.541179000000000087e+04	2.515008000000000175e+04	1.707004999999999927e+04	1.177937999999999920e+04	1.163225000000000000e+04	8.784930000000000291e+03
2.401615000000000146e+04	2.190495000000000073e+04	2.018527000000000044e+04	1.861534000000000015e+04	2.078297000000000116e+04	1.630711000000000058e+04	1.628047999999999956e+04	2.227309999999999854e+04	2.157750000000000000e+04	1.701800999999999840e+04	1.778822999999999956e+04	2.197545000000000073e+04	1.997006999999999971e+04	1.833609999999999854e+04	1.782154000000000087e+04	2.166529999999999927e+04	2.625613000000000102e+04	2.532104000000000087e+04	1.395950000000000000e+04	2.822450999999999840e+04	1.910340000000000146e+04	2.331927999999999884e+04	1.285239999999999964e+04	2.239218999999999869e+04	1.342144000000000051e+04	1.350643000000000029e+04	1.234681999999999971e+04	2.795025999999999840e+04	2.312338999999999942e+04	1.909684999999999854e+04	1.822906000000000131e+04	1.728340000000000146e+04	1.829047999999999956e+04	1.462018000000000029e+04	1.659059000000000015e+04	2.002947999999999956e+04	2.098354999999999927e+04	1.539920000000000073e+04	2.874599000000000160e+04	1.539920000000000073e+04	2.795758000000000175e+04	1.350643000000000029e+04	1.182629000000000087e+04	2.822450999999999840e+04	2.653095000000000073e+04	2.625613000000000102e+04	1.829047999999999956e+04	1.339517000000000007e+04	1.327493000000000029e+04	1.138918000000000029e+04
2.274793000000000029e+04	2.101947000000000116e+04	2.023465999999999985e+04	1.921277999999999884e+04	2.067606999999999971e+04	1.836915999999999985e+04	1.809302000000000044e+04	2.122879000000000087e+04	2.116977999999999884e+04	1.839938000000000102e+04	1.869747000000000116e+04	2.130354999999999927e+04	2.007986000000000058e+04	2.110579000000000087e+04	1.871309999999999854e+04	2.117115000000000146e+04	2.722825999999999840e+04	2.632306000000000131e+04	1.572784000000000015e+04	2.927652000000000044e+04	2.033554000000000087e+04	2.434802999999999884e+04	1.490726000000000022e+04	2.347679999999999927e+04	1.531720000000000073e+04	1.538007999999999993e+04	1.456636000000000058e+04	2.899018999999999869e+04	2.416586000000000058e+04	2.032502999999999884e+04	1.950306000000000131e+04	1.861850999999999840e+04	1.956602000000000044e+04	1.624293000000000029e+04	1.797474000000000160e+04	2.119918000000000029e+04	2.209900999999999840e+04	1.689156000000000131e+04	2.981938999999999942e+04	1.689156000000000131e+04	2.899506000000000131e+04	1.538007999999999993e+04	1.509213999999999942e+04	2.927652000000000044e+04	2.751497000000000116e+04	2.722825999999999840e+04	1.956602000000000044e+04	1.529115999999999985e+04	1.520527000000000044e+04	1.441370999999999913e+04
2.212565000000000146e+04	2.129543999999999869e+04	2.228052000000000044e+04	2.222741999999999825e+04	2.241995999999999913e+04	2.349134999999999854e+04	2.290884000000000015e+04	2.117320999999999913e+04	2.233968000000000029e+04	2.262111999999999898e+04	2.222288999999999942e+04	2.197075999999999840e+04	2.223950999999999840e+04	2.701990000000000146e+04	2.221116999999999825e+04	2.218179999999999927e+04	3.043879000000000087e+04	2.961375999999999840e+04	2.061468999999999869e+04	3.254895999999999913e+04	2.423933000000000175e+04	2.775800999999999840e+04	2.018313999999999942e+04	2.701031000000000131e+04	2.038322999999999956e+04	2.041591999999999825e+04	2.004604000000000087e+04	3.225188999999999942e+04	2.760483000000000175e+04	2.422359000000000015e+04	2.351170000000000073e+04	2.276325000000000000e+04	2.357343999999999869e+04	2.091527000000000044e+04	2.222511000000000058e+04	2.496718999999999869e+04	2.574204000000000087e+04	2.135384999999999854e+04	3.311025000000000000e+04	2.135384999999999854e+04	3.225268000000000029e+04	2.041591999999999825e+04	2.161293999999999869e+04	3.254895999999999913e+04	3.073463999999999942e+04	3.043879000000000087e+04	2.357343999999999869e+04	2.035899000000000160e+04	2.031895999999999913e+04	2.072334000000000015e+04
2.404583000000000175e+04	2.192593999999999869e+04	2.018393000000000029e+04	1.860095999999999913e+04	2.078527000000000044e+04	1.625597999999999956e+04	1.623590999999999985e+04	2.229783000000000175e+04	2.158691999999999825e+04	1.698434000000000015e+04	1.776631999999999971e+04	2.199120999999999913e+04	1.996731999999999971e+04	1.826602000000000044e+04	1.780006000000000131e+04	2.167681999999999971e+04	2.622995000000000073e+04	2.529433000000000175e+04	1.391727000000000044e+04	2.819595000000000073e+04	1.907268999999999869e+04	2.329238999999999942e+04	1.280312999999999920e+04	2.236415000000000146e+04	1.337612999999999920e+04	1.346165999999999985e+04	1.229336000000000058e+04	2.792206000000000131e+04	2.309620000000000073e+04	1.906625000000000000e+04	1.819761999999999898e+04	1.725079000000000087e+04	1.825897999999999956e+04	1.458143000000000029e+04	1.655704000000000087e+04	2.000002000000000044e+04	2.095515000000000146e+04	1.536345000000000073e+04	2.871681000000000131e+04	1.536345000000000073e+04	2.792943000000000029e+04	1.346165999999999985e+04	1.174451000000000022e+04	2.819595000000000073e+04	2.650441999999999825e+04	2.622995000000000073e+04	1.825897999999999956e+04	1.334987000000000080e+04	1.322877000000000044e+04	1.131395000000000073e+04
1.669270999999999913e+04	1.757131999999999971e+04	2.130311000000000058e+04	2.288715999999999985e+04	2.090663999999999942e+04	2.767293000000000029e+04	2.659154999999999927e+04	1.691686000000000058e+04	1.988065999999999985e+04	2.527902999999999884e+04	2.374825999999999840e+04	1.874879000000000087e+04	2.146147999999999956e+04	3.254072000000000116e+04	2.369220999999999913e+04	1.949004999999999927e+04	3.021881000000000131e+04	2.963090000000000146e+04	2.478713999999999942e+04	3.222279000000000087e+04	2.607518999999999869e+04	2.821538999999999942e+04	2.513038999999999942e+04	2.778670999999999913e+04	2.491541999999999825e+04	2.488831000000000131e+04	2.539593000000000029e+04	3.193522999999999956e+04	2.813383000000000175e+04	2.605263999999999942e+04	2.564806999999999971e+04	2.526204000000000087e+04	2.569772000000000116e+04	2.465670999999999913e+04	2.500009000000000015e+04	2.645120999999999913e+04	2.689004999999999927e+04	2.465050000000000000e+04	3.276418999999999869e+04	2.465050000000000000e+04	3.192852999999999884e+04	2.488831000000000131e+04	2.925640999999999985e+04	3.222279000000000087e+04	3.049877999999999884e+04	3.021881000000000131e+04	2.569772000000000116e+04	2.489841999999999825e+04	2.494788000000000102e+04	2.779963000000000102e+04
2.127968999999999869e+04	2.093702000000000044e+04	2.277320000000000073e+04	2.320229000000000087e+04	2.275745999999999913e+04	2.550168999999999869e+04	2.476984999999999854e+04	2.065116999999999825e+04	2.239291999999999825e+04	2.418586999999999898e+04	2.345093000000000029e+04	2.178456999999999971e+04	2.279015999999999985e+04	2.943565999999999985e+04	2.342597999999999956e+04	2.216074000000000160e+04	3.132283000000000175e+04	3.055361000000000058e+04	2.256491999999999825e+04	3.343179000000000087e+04	2.560377999999999884e+04	2.879406000000000131e+04	2.234136000000000058e+04	2.812481999999999971e+04	2.242968999999999869e+04	2.244629000000000087e+04	2.231288000000000102e+04	3.313355000000000291e+04	2.865881000000000131e+04	2.558575999999999840e+04	2.494677000000000044e+04	2.428563000000000102e+04	2.500638000000000102e+04	2.275013999999999942e+04	2.381436999999999898e+04	2.624572000000000116e+04	2.693949000000000160e+04	2.307211000000000058e+04	3.399455999999999767e+04	2.307211000000000058e+04	3.313219000000000233e+04	2.244629000000000087e+04	2.449466999999999825e+04	3.343179000000000087e+04	3.161845999999999913e+04	3.132283000000000175e+04	2.500638000000000102e+04	2.240695000000000073e+04	2.239115000000000146e+04	2.345684999999999854e+04
2.201718999999999869e+04	2.108493999999999869e+04	2.189566999999999825e+04	2.175274000000000160e+04	2.206484999999999854e+04	2.284638999999999942e+04	2.228602000000000044e+04	2.099774000000000160e+04	2.204124000000000160e+04	2.204458000000000175e+04	2.170341999999999825e+04	2.172225999999999840e+04	2.184365999999999985e+04	2.632195000000000073e+04	2.169402000000000044e+04	2.189884999999999854e+04	2.996699000000000160e+04	2.913308000000000175e+04	1.998174000000000160e+04	3.207500999999999840e+04	2.369315000000000146e+04	2.726286000000000058e+04	1.952149000000000160e+04	2.650254999999999927e+04	1.973675999999999840e+04	1.977168000000000029e+04	1.937029999999999927e+04	3.177845999999999913e+04	2.710675999999999840e+04	2.367781000000000131e+04	2.295493000000000029e+04	2.219334999999999854e+04	2.301691999999999825e+04	2.029906999999999971e+04	2.164525000000000000e+04	2.443433000000000175e+04	2.522181999999999971e+04	2.075493000000000029e+04	3.263545999999999913e+04	2.075493000000000029e+04	3.177961999999999898e+04	1.977168000000000029e+04	2.087833000000000175e+04	3.207500999999999840e+04	3.026252999999999884e+04	2.996699000000000160e+04	2.301691999999999825e+04	1.971234000000000015e+04	1.966895000000000073e+04	1.999820000000000073e+04
1.831270000000000073e+04	1.976300999999999840e+04	2.408865999999999985e+04	2.599102000000000044e+04	2.357113999999999942e+04	3.128727000000000044e+04	3.014981000000000131e+04	1.897129999999999927e+04	2.233088999999999942e+04	2.869858000000000175e+04	2.700056999999999971e+04	2.102922999999999956e+04	2.428991999999999825e+04	3.627993000000000029e+04	2.693754000000000087e+04	2.189200999999999840e+04	3.292056999999999971e+04	3.240506000000000131e+04	2.844361000000000058e+04	3.485444000000000233e+04	2.932884999999999854e+04	3.112743000000000029e+04	2.887686000000000058e+04	3.078125999999999840e+04	2.861568999999999869e+04	2.858156999999999971e+04	2.918320000000000073e+04	3.457523999999999796e+04	3.106431000000000131e+04	2.930550999999999840e+04	2.896770000000000073e+04	2.865472000000000116e+04	2.901400999999999840e+04	2.825668000000000029e+04	2.844513000000000102e+04	2.962702999999999884e+04	2.998625999999999840e+04	2.818543999999999869e+04	3.537976999999999680e+04	2.818543999999999869e+04	3.456675000000000000e+04	2.858156999999999971e+04	3.320205000000000291e+04	3.485444000000000233e+04	3.319026999999999680e+04	3.292056999999999971e+04	2.901400999999999840e+04	2.859983000000000175e+04	2.865947000000000116e+04	3.171713000000000102e+04
2.127308000000000175e+04	2.096547999999999956e+04	2.285713000000000102e+04	2.331633000000000175e+04	2.283131999999999971e+04	2.567515000000000146e+04	2.493527999999999884e+04	2.066841999999999825e+04	2.244822999999999956e+04	2.433465000000000146e+04	2.358022000000000116e+04	2.182415999999999985e+04	2.287781000000000131e+04	2.962990000000000146e+04	2.355450000000000000e+04	2.221124000000000160e+04	3.142704999999999927e+04	3.066163999999999942e+04	2.273631000000000131e+04	3.353516999999999825e+04	2.574004999999999927e+04	2.890884000000000015e+04	2.252408000000000175e+04	2.824475000000000000e+04	2.260638999999999942e+04	2.262211000000000058e+04	2.250133000000000175e+04	3.323694999999999709e+04	2.877475999999999840e+04	2.572190000000000146e+04	2.508756000000000131e+04	2.443188999999999942e+04	2.514700999999999840e+04	2.291504999999999927e+04	2.396477000000000044e+04	2.637652000000000044e+04	2.706504000000000087e+04	2.323029000000000087e+04	3.409783999999999651e+04	2.323029000000000087e+04	3.323545999999999913e+04	2.262211000000000058e+04	2.471265000000000146e+04	3.353516999999999825e+04	3.172256000000000131e+04	3.142704999999999927e+04	2.514700999999999840e+04	2.258374000000000160e+04	2.256925999999999840e+04	2.366820000000000073e+04
2.399649000000000160e+04	2.194545000000000073e+04	2.037029999999999927e+04	1.887943000000000029e+04	2.094513999999999942e+04	1.676815000000000146e+04	1.670966999999999825e+04	2.228811999999999898e+04	2.169415999999999985e+04	1.739070999999999913e+04	1.809595999999999913e+04	2.205072000000000116e+04	2.016388999999999942e+04	1.887724000000000160e+04	1.812679999999999927e+04	2.176843000000000029e+04	2.658538999999999942e+04	2.565350000000000000e+04	1.437785000000000036e+04	2.856665999999999985e+04	1.945940000000000146e+04	2.365315999999999985e+04	1.330576000000000022e+04	2.273268000000000029e+04	1.385540999999999985e+04	1.393768000000000029e+04	1.281996999999999935e+04	2.829050999999999840e+04	2.345893999999999869e+04	1.945229000000000087e+04	1.858929000000000087e+04	1.765025000000000000e+04	1.865104000000000087e+04	1.502051000000000022e+04	1.696277000000000044e+04	2.037834999999999854e+04	2.132634999999999854e+04	1.578359000000000015e+04	2.909152000000000044e+04	1.578359000000000015e+04	2.829750000000000000e+04	1.393768000000000029e+04	1.239935000000000036e+04	2.856665999999999985e+04	2.686213999999999942e+04	2.658538999999999942e+04	1.865104000000000087e+04	1.382911000000000058e+04	1.371309000000000015e+04	1.194770999999999913e+04
1.694345000000000073e+04	1.798352000000000044e+04	2.189327999999999884e+04	2.357234000000000015e+04	2.146129999999999927e+04	2.851568999999999869e+04	2.741640999999999985e+04	1.728831000000000131e+04	2.037215999999999985e+04	2.606063999999999942e+04	2.447836000000000058e+04	1.918950000000000000e+04	2.206429999999999927e+04	3.342431999999999971e+04	2.442016999999999825e+04	1.996697000000000116e+04	3.079595000000000073e+04	3.022784999999999854e+04	2.564215000000000146e+04	3.278209999999999854e+04	2.680756000000000131e+04	2.885018999999999869e+04	2.601468000000000029e+04	2.844479000000000087e+04	2.578456000000000131e+04	2.575518000000000029e+04	2.629386000000000058e+04	3.249661999999999898e+04	2.877383000000000175e+04	2.678475999999999840e+04	2.639979000000000087e+04	2.603549000000000160e+04	2.644847000000000116e+04	2.549374000000000160e+04	2.578929000000000087e+04	2.716088999999999942e+04	2.757679999999999927e+04	2.546718000000000029e+04	3.331948000000000320e+04	2.546718000000000029e+04	3.248941999999999825e+04	2.575518000000000029e+04	3.021209000000000015e+04	3.278209999999999854e+04	3.107329000000000087e+04	3.079595000000000073e+04	2.644847000000000116e+04	2.576793000000000029e+04	2.582070999999999913e+04	2.874395000000000073e+04
1.991113999999999942e+04	2.182440000000000146e+04	2.660309999999999854e+04	2.878420000000000073e+04	2.598099000000000160e+04	3.456912000000000262e+04	3.337481999999999971e+04	2.093359000000000015e+04	2.456597000000000116e+04	3.178472000000000116e+04	2.992977000000000044e+04	2.313829000000000087e+04	2.684159000000000015e+04	3.969269999999999709e+04	2.986034999999999854e+04	2.409200000000000000e+04	3.525613999999999942e+04	3.481637999999999738e+04	3.178395000000000073e+04	3.710466000000000349e+04	3.224150999999999840e+04	3.368561000000000058e+04	3.231852999999999884e+04	3.342391999999999825e+04	3.200468000000000029e+04	3.196272000000000116e+04	3.267299000000000160e+04	3.683600000000000000e+04	3.364123000000000320e+04	3.221754000000000087e+04	3.194970000000000073e+04	3.171343999999999869e+04	3.199231000000000131e+04	3.153581000000000131e+04	3.155920999999999913e+04	3.245927000000000044e+04	3.273627999999999884e+04	3.139522000000000116e+04	3.760987999999999738e+04	3.139522000000000116e+04	3.682580999999999767e+04	3.196272000000000116e+04	3.691247000000000116e+04	3.710466000000000349e+04	3.551338999999999942e+04	3.525613999999999942e+04	3.199231000000000131e+04	3.199018999999999869e+04	3.206129000000000087e+04	3.538008000000000175e+04
2.708765999999999985e+04	2.440808000000000175e+04	2.105988000000000102e+04	1.854522999999999956e+04	2.190936999999999898e+04	1.315171999999999935e+04	1.376501000000000022e+04	2.504052000000000044e+04	2.321609999999999854e+04	1.543348999999999978e+04	1.715681999999999971e+04	2.408045000000000073e+04	2.074588999999999942e+04	1.304387999999999920e+04	1.722406999999999971e+04	2.346050999999999840e+04	2.476763000000000102e+04	2.382363999999999942e+04	1.195069000000000051e+04	2.645836999999999898e+04	1.760609000000000015e+04	2.189811000000000058e+04	1.033851000000000022e+04	2.091902000000000044e+04	1.120018000000000029e+04	1.132395999999999913e+04	9.499219999999999345e+03	2.622395000000000073e+04	2.168663999999999942e+04	1.760918999999999869e+04	1.673636000000000058e+04	1.576981999999999971e+04	1.678699000000000160e+04	1.284364999999999964e+04	1.505939999999999964e+04	1.857638999999999942e+04	1.956106999999999971e+04	1.379884000000000015e+04	2.690834000000000015e+04	1.379884000000000015e+04	2.623616999999999825e+04	1.132395999999999913e+04	5.503279999999999745e+03	2.645836999999999898e+04	2.500113999999999942e+04	2.476763000000000102e+04	1.678699000000000160e+04	1.117902000000000044e+04	1.099577000000000044e+04	6.117260000000000218e+03
2.550272000000000116e+04	2.302179000000000087e+04	2.029177999999999884e+04	1.813433000000000175e+04	2.104920999999999913e+04	1.403726000000000022e+04	1.435479000000000087e+04	2.355643000000000029e+04	2.216315999999999985e+04	1.562851000000000022e+04	1.696236000000000058e+04	2.284927999999999884e+04	2.001416999999999825e+04	1.501879999999999927e+04	1.701609000000000015e+04	2.234697999999999956e+04	2.506486999999999898e+04	2.411515000000000146e+04	1.223781999999999971e+04	2.689445999999999913e+04	1.780863999999999942e+04	2.213334000000000015e+04	1.080577000000000044e+04	2.116458000000000175e+04	1.156035000000000036e+04	1.167031999999999971e+04	1.009569000000000051e+04	2.664031000000000131e+04	2.192613000000000102e+04	1.780741999999999825e+04	1.691920999999999913e+04	1.594043000000000029e+04	1.697583000000000175e+04	1.305248999999999978e+04	1.522037000000000080e+04	1.877668999999999869e+04	1.976390000000000146e+04	1.395613999999999942e+04	2.738000999999999840e+04	1.395613999999999942e+04	2.665045999999999913e+04	1.167031999999999971e+04	7.939010000000000218e+03	2.689445999999999913e+04	2.531900000000000000e+04	2.506486999999999898e+04	1.697583000000000175e+04	1.153579000000000087e+04	1.137569000000000051e+04	7.909409999999999854e+03
1.696345999999999913e+04	1.800138000000000102e+04	2.190788000000000102e+04	2.358465000000000146e+04	2.147665000000000146e+04	2.852277000000000044e+04	2.742422000000000116e+04	1.730675999999999840e+04	2.038872000000000116e+04	2.607004000000000087e+04	2.448940999999999985e+04	1.920691999999999825e+04	2.207861999999999898e+04	3.342951000000000204e+04	2.443127999999999884e+04	1.998377999999999884e+04	3.081093000000000029e+04	3.024238000000000102e+04	2.564866999999999825e+04	3.279745999999999913e+04	2.681856000000000131e+04	2.886383000000000175e+04	2.601981000000000131e+04	2.845784999999999854e+04	2.579043999999999869e+04	2.576115999999999985e+04	2.629825000000000000e+04	3.251193999999999869e+04	2.878734999999999854e+04	2.679577000000000044e+04	2.641018999999999869e+04	2.604516999999999825e+04	2.645890000000000146e+04	2.550104000000000087e+04	2.579843000000000029e+04	2.717256000000000131e+04	2.758911000000000058e+04	2.547529999999999927e+04	3.333493000000000029e+04	2.547529999999999927e+04	3.250475000000000000e+04	2.576115999999999985e+04	3.021229000000000087e+04	3.279745999999999913e+04	3.108833000000000175e+04	3.081093000000000029e+04	2.645890000000000146e+04	2.577379000000000087e+04	2.582640000000000146e+04	2.874520999999999913e+04
2.703347000000000116e+04	2.436193000000000029e+04	2.103920000000000073e+04	1.853856999999999971e+04	2.188509999999999854e+04	1.319650000000000000e+04	1.379759000000000015e+04	2.499027000000000044e+04	2.318402000000000044e+04	1.545057999999999993e+04	1.715854000000000087e+04	2.404093999999999869e+04	2.072663000000000102e+04	1.313568000000000029e+04	1.722525000000000000e+04	2.342588999999999942e+04	2.479372000000000116e+04	2.384918000000000029e+04	1.196813999999999942e+04	2.649081000000000131e+04	1.762502999999999884e+04	2.192056000000000131e+04	1.036134000000000015e+04	2.094150999999999840e+04	1.121972999999999956e+04	1.134310000000000036e+04	9.526180000000000291e+03	2.625549000000000160e+04	2.170918999999999869e+04	1.762793999999999869e+04	1.675388999999999942e+04	1.578612999999999920e+04	1.680481000000000131e+04	1.285882999999999993e+04	1.507471999999999935e+04	1.859579999999999927e+04	1.958109999999999854e+04	1.381284000000000015e+04	2.694238999999999942e+04	1.381284000000000015e+04	2.626763000000000102e+04	1.134310000000000036e+04	5.608210000000000036e+03	2.649081000000000131e+04	2.502816999999999825e+04	2.479372000000000116e+04	1.680481000000000131e+04	1.119838999999999942e+04	1.101587000000000080e+04	6.191380000000000109e+03
1.672256000000000131e+04	1.756122999999999956e+04	2.124436000000000058e+04	2.280056999999999971e+04	2.085784000000000015e+04	2.753463999999999942e+04	2.645968000000000029e+04	1.691731999999999971e+04	1.984915999999999985e+04	2.516190000000000146e+04	2.364781000000000131e+04	1.873095000000000073e+04	2.139913000000000102e+04	3.238690999999999985e+04	2.359241999999999825e+04	1.946252999999999884e+04	3.016216999999999825e+04	2.956881999999999971e+04	2.464465000000000146e+04	3.217081999999999971e+04	2.597370999999999913e+04	2.814275000000000000e+04	2.497674000000000160e+04	2.770738999999999942e+04	2.476763999999999942e+04	2.474138999999999942e+04	2.523679000000000087e+04	3.188270999999999913e+04	2.805970999999999913e+04	2.595124000000000160e+04	2.554056000000000131e+04	2.514759000000000015e+04	2.559050000000000000e+04	2.452074000000000160e+04	2.488047999999999956e+04	2.635666999999999825e+04	2.680236999999999898e+04	2.452165000000000146e+04	3.271325000000000000e+04	2.452165000000000146e+04	3.187615000000000146e+04	2.474138999999999942e+04	2.906986000000000058e+04	3.217081999999999971e+04	3.044283000000000175e+04	3.016216999999999825e+04	2.559050000000000000e+04	2.475050999999999840e+04	2.479868999999999869e+04	2.761934000000000015e+04
2.182747999999999956e+04	2.113629999999999927e+04	2.237556000000000131e+04	2.246779999999999927e+04	2.246895999999999913e+04	2.405268999999999869e+04	2.342286999999999898e+04	2.096613000000000102e+04	2.230409999999999854e+04	2.304291999999999825e+04	2.254045000000000073e+04	2.186375999999999840e+04	2.235183000000000175e+04	2.771131999999999971e+04	2.252465999999999985e+04	2.212390000000000146e+04	3.066511000000000058e+04	2.985584000000000015e+04	2.115274000000000160e+04	3.277731999999999971e+04	2.460238000000000102e+04	2.802663000000000102e+04	2.078590000000000146e+04	2.730159999999999854e+04	2.095109999999999854e+04	2.097877999999999884e+04	2.068293999999999869e+04	3.247956999999999971e+04	2.787865999999999985e+04	2.458591999999999825e+04	2.389515999999999985e+04	2.317224000000000160e+04	2.395634999999999854e+04	2.141777999999999884e+04	2.265375999999999840e+04	2.530520000000000073e+04	2.605659000000000015e+04	2.182086000000000058e+04	3.333963999999999942e+04	2.182086000000000058e+04	3.247972000000000116e+04	2.097877999999999884e+04	2.244749000000000160e+04	3.277731999999999971e+04	3.096125000000000000e+04	3.066511000000000058e+04	2.395634999999999854e+04	2.092729000000000087e+04	2.089481000000000131e+04	2.150972999999999956e+04
2.130352000000000044e+04	2.096058000000000175e+04	2.279520000000000073e+04	2.322275999999999840e+04	2.277986000000000058e+04	2.551716999999999825e+04	2.478620999999999913e+04	2.067486999999999898e+04	2.241590999999999985e+04	2.420381999999999971e+04	2.347040999999999985e+04	2.180793999999999869e+04	2.281200000000000000e+04	2.944834999999999854e+04	2.344552000000000044e+04	2.218386000000000058e+04	3.134384999999999854e+04	3.057441999999999825e+04	2.258065000000000146e+04	3.345284999999999854e+04	2.562275000000000000e+04	2.881447999999999956e+04	2.235570999999999913e+04	2.814493000000000029e+04	2.244479999999999927e+04	2.246150000000000000e+04	2.232645000000000073e+04	3.315461000000000058e+04	2.867915999999999985e+04	2.560474000000000160e+04	2.496538999999999942e+04	2.430379999999999927e+04	2.502500999999999840e+04	2.276656000000000131e+04	2.383218999999999869e+04	2.626509999999999854e+04	2.695922999999999956e+04	2.308920999999999913e+04	3.401562000000000262e+04	2.308920999999999913e+04	3.315325000000000000e+04	2.246150000000000000e+04	2.450266999999999825e+04	3.345284999999999854e+04	3.163949000000000160e+04	3.134384999999999854e+04	2.502500999999999840e+04	2.242204000000000087e+04	2.240609000000000015e+04	2.346643999999999869e+04
1.731000000000000000e+04	1.794538999999999942e+04	2.135375999999999840e+04	2.274359000000000015e+04	2.102440000000000146e+04	2.714188000000000102e+04	2.611113999999999942e+04	1.735783000000000175e+04	2.011361000000000058e+04	2.491138000000000102e+04	2.350470000000000073e+04	1.907134000000000015e+04	2.148756999999999971e+04	3.188272999999999956e+04	2.345356000000000131e+04	1.974938000000000102e+04	3.027093999999999869e+04	2.964702000000000044e+04	2.422679999999999927e+04	3.230422000000000116e+04	2.582079000000000087e+04	2.816116999999999825e+04	2.448075000000000000e+04	2.768681999999999971e+04	2.431311999999999898e+04	2.429290000000000146e+04	2.470122000000000116e+04	3.201331999999999971e+04	2.806950000000000000e+04	2.579886000000000058e+04	2.535054999999999927e+04	2.491418000000000029e+04	2.540231000000000131e+04	2.414729000000000087e+04	2.461441999999999825e+04	2.624602000000000044e+04	2.673286000000000058e+04	2.419568999999999869e+04	3.285205000000000291e+04	2.419568999999999869e+04	3.200756000000000131e+04	2.429290000000000146e+04	2.832190000000000146e+04	3.230422000000000116e+04	3.055527000000000044e+04	3.027093999999999869e+04	2.540231000000000131e+04	2.429506000000000131e+04	2.433431999999999971e+04	2.692256000000000131e+04
2.570204000000000087e+04	2.316145999999999913e+04	2.025858000000000175e+04	1.800416999999999825e+04	2.104179000000000087e+04	1.359310000000000036e+04	1.397543000000000029e+04	2.372456000000000131e+04	2.220936999999999898e+04	1.534347999999999956e+04	1.677500999999999840e+04	2.294536999999999898e+04	1.997086000000000058e+04	1.437145999999999913e+04	1.683222999999999956e+04	2.240997000000000116e+04	2.477672000000000116e+04	2.382697999999999956e+04	1.191629999999999927e+04	2.657661000000000058e+04	1.752858000000000175e+04	2.185508000000000175e+04	1.043447999999999956e+04	2.088213000000000102e+04	1.121812999999999920e+04	1.133192000000000007e+04	9.690729999999999563e+03	2.632668000000000029e+04	2.164650999999999840e+04	1.752836000000000058e+04	1.664122000000000116e+04	1.566218000000000029e+04	1.669659999999999854e+04	1.275338999999999942e+04	1.494181999999999971e+04	1.849963999999999942e+04	1.948854999999999927e+04	1.367331999999999971e+04	2.705459000000000015e+04	1.367331999999999971e+04	2.633731000000000131e+04	1.133192000000000007e+04	7.207470000000000255e+03	2.657661000000000058e+04	2.502640000000000146e+04	2.477672000000000116e+04	1.669659999999999854e+04	1.119418000000000029e+04	1.102781999999999971e+04	7.262189999999999600e+03
1.954325000000000000e+04	2.138277000000000044e+04	2.609279000000000087e+04	2.822997000000000116e+04	2.548731000000000131e+04	3.393851999999999680e+04	3.275295999999999913e+04	2.050677999999999884e+04	2.409961999999999898e+04	3.118459000000000015e+04	2.935411999999999898e+04	2.269088999999999942e+04	2.632538000000000102e+04	3.904230999999999767e+04	2.928570000000000073e+04	2.363084999999999854e+04	3.478234999999999854e+04	3.432948999999999796e+04	3.114327000000000044e+04	3.664648999999999796e+04	3.166975999999999840e+04	3.317333999999999651e+04	3.166213000000000102e+04	3.289737999999999738e+04	3.135641999999999825e+04	3.131568000000000029e+04	3.200920000000000073e+04	3.637587999999999738e+04	3.312579000000000087e+04	3.164588000000000102e+04	3.136650999999999840e+04	3.111770999999999913e+04	3.140974000000000160e+04	3.090472999999999956e+04	3.095449000000000160e+04	3.190081999999999971e+04	3.219152999999999884e+04	3.077509999999999854e+04	3.715544000000000233e+04	3.077509999999999854e+04	3.636597000000000116e+04	3.131568000000000029e+04	3.621569000000000233e+04	3.664648999999999796e+04	3.504186000000000058e+04	3.478234999999999854e+04	3.140974000000000160e+04	3.134170999999999913e+04	3.141104000000000087e+04	3.469023999999999796e+04
2.043879999999999927e+04	2.245049000000000160e+04	2.731968000000000029e+04	2.956054000000000087e+04	2.667497999999999956e+04	3.545080000000000291e+04	3.424437999999999738e+04	2.154043000000000029e+04	2.522336000000000058e+04	3.262409000000000015e+04	3.073547999999999956e+04	2.377088999999999942e+04	2.756618999999999869e+04	4.060186000000000058e+04	3.066470000000000073e+04	2.474261999999999898e+04	3.591755000000000291e+04	3.549627999999999884e+04	3.268040000000000146e+04	3.774347000000000116e+04	3.304098000000000320e+04	3.440143000000000029e+04	3.323722000000000116e+04	3.415976999999999680e+04	3.291183000000000175e+04	3.286815000000000146e+04	3.360218000000000029e+04	3.747766000000000349e+04	3.436148000000000320e+04	3.301688999999999942e+04	3.276527999999999884e+04	3.254666999999999825e+04	3.280701000000000204e+04	3.241877000000000044e+04	3.240509000000000015e+04	3.324006999999999971e+04	3.349781999999999971e+04	3.226275000000000000e+04	3.824327999999999884e+04	3.226275000000000000e+04	3.746705999999999767e+04	3.286815000000000146e+04	3.788926000000000204e+04	3.774347000000000116e+04	3.617152999999999884e+04	3.591755000000000291e+04	3.280701000000000204e+04	3.289765000000000146e+04	3.297126000000000204e+04	3.634669000000000233e+04
1.831270000000000073e+04	1.976300999999999840e+04	2.408865999999999985e+04	2.599102000000000044e+04	2.357113999999999942e+04	3.128727000000000044e+04	3.014981000000000131e+04	1.897129999999999927e+04	2.233088999999999942e+04	2.869858000000000175e+04	2.700056999999999971e+04	2.102922999999999956e+04	2.428991999999999825e+04	3.627993000000000029e+04	2.693754000000000087e+04	2.189200999999999840e+04	3.292056999999999971e+04	3.240506000000000131e+04	2.844361000000000058e+04	3.485444000000000233e+04	2.932884999999999854e+04	3.112743000000000029e+04	2.887686000000000058e+04	3.078125999999999840e+04	2.861568999999999869e+04	2.858156999999999971e+04	2.918320000000000073e+04	3.457523999999999796e+04	3.106431000000000131e+04	2.930550999999999840e+04	2.896770000000000073e+04	2.865472000000000116e+04	2.901400999999999840e+04	2.825668000000000029e+04	2.844513000000000102e+04	2.962702999999999884e+04	2.998625999999999840e+04	2.818543999999999869e+04	3.537976999999999680e+04	2.818543999999999869e+04	3.456675000000000000e+04	2.858156999999999971e+04	3.320205000000000291e+04	3.485444000000000233e+04	3.319026999999999680e+04	3.292056999999999971e+04	2.901400999999999840e+04	2.859983000000000175e+04	2.865947000000000116e+04	3.171713000000000102e+04
1.674497000000000116e+04	1.758406999999999971e+04	2.126670999999999913e+04	2.282211000000000058e+04	2.088038000000000102e+04	2.755338000000000102e+04	2.647888000000000102e+04	1.694011999999999898e+04	1.987193000000000029e+04	2.518202000000000044e+04	2.366877999999999884e+04	1.875377999999999884e+04	2.142140000000000146e+04	3.240436000000000058e+04	2.361341999999999825e+04	1.948531999999999971e+04	3.018456000000000131e+04	2.959109000000000015e+04	2.466306999999999971e+04	3.219329999999999927e+04	2.599463000000000102e+04	2.816475000000000000e+04	2.499422000000000116e+04	2.772918000000000029e+04	2.478563999999999942e+04	2.475945999999999913e+04	2.525375000000000000e+04	3.190518999999999869e+04	2.808165999999999985e+04	2.597216999999999825e+04	2.556118999999999869e+04	2.516786000000000058e+04	2.561115000000000146e+04	2.453965000000000146e+04	2.490045999999999913e+04	2.637788999999999942e+04	2.682386000000000058e+04	2.454104999999999927e+04	3.273575000000000000e+04	2.454104999999999927e+04	3.189863000000000102e+04	2.475945999999999913e+04	2.908354000000000087e+04	3.219329999999999927e+04	3.046524000000000160e+04	3.018456000000000131e+04	2.561115000000000146e+04	2.476849000000000160e+04	2.481656999999999971e+04	2.763390000000000146e+04
2.526109000000000015e+04	2.283872000000000116e+04	2.027654999999999927e+04	1.821515000000000146e+04	2.100836000000000058e+04	1.442740999999999985e+04	1.468195999999999913e+04	2.334590000000000146e+04	2.206981000000000131e+04	1.586251000000000022e+04	1.710006999999999971e+04	2.270775000000000000e+04	2.000899000000000160e+04	1.560755999999999949e+04	1.715036000000000058e+04	2.223745999999999913e+04	2.529006999999999971e+04	2.434115000000000146e+04	1.251510000000000036e+04	2.714725000000000000e+04	1.803402000000000044e+04	2.235156000000000131e+04	1.113505999999999949e+04	2.138788000000000102e+04	1.185946999999999935e+04	1.196544000000000051e+04	1.045942000000000007e+04	2.688915999999999985e+04	2.214588000000000102e+04	1.803184000000000015e+04	1.714406000000000131e+04	1.616729999999999927e+04	1.720175999999999840e+04	1.330601000000000022e+04	1.544897999999999956e+04	1.899774000000000160e+04	1.998200000000000000e+04	1.419172999999999956e+04	2.763986999999999898e+04	1.419172999999999956e+04	2.689881999999999971e+04	1.196544000000000051e+04	8.621549999999999272e+03	2.714725000000000000e+04	2.554831999999999971e+04	2.529006999999999971e+04	1.720175999999999840e+04	1.183439999999999964e+04	1.168078000000000065e+04	8.508489999999999782e+03
2.175466999999999825e+04	2.058186000000000058e+04	2.096729999999999927e+04	2.060650999999999840e+04	2.120804000000000087e+04	2.128897000000000116e+04	2.078143000000000029e+04	2.057938000000000102e+04	2.132177000000000044e+04	2.065104000000000087e+04	2.044856000000000131e+04	2.112472999999999956e+04	2.088875000000000000e+04	2.464229999999999927e+04	2.044479000000000087e+04	2.121738000000000102e+04	2.881113000000000102e+04	2.795731000000000131e+04	1.845611000000000058e+04	3.091113999999999942e+04	2.236963999999999942e+04	2.605547999999999956e+04	1.792825999999999840e+04	2.526627999999999884e+04	1.817920999999999913e+04	1.821940999999999985e+04	1.774422999999999956e+04	3.061620999999999913e+04	2.589265999999999985e+04	2.235531000000000131e+04	2.160729000000000087e+04	2.081550999999999840e+04	2.166977999999999884e+04	1.881311000000000058e+04	2.024443999999999869e+04	2.314152000000000044e+04	2.395793999999999869e+04	1.930977999999999884e+04	3.146890000000000146e+04	1.930977999999999884e+04	3.061827000000000044e+04	1.821940999999999985e+04	1.912809000000000015e+04	3.091113999999999942e+04	2.910550000000000000e+04	2.881113000000000102e+04	2.166977999999999884e+04	1.815440000000000146e+04	1.810309000000000015e+04	1.826366999999999825e+04
2.696772999999999956e+04	2.430122999999999956e+04	2.099527999999999884e+04	1.850441999999999825e+04	2.183872999999999956e+04	1.320112000000000080e+04	1.379260000000000036e+04	2.492699000000000160e+04	2.313240999999999985e+04	1.543375000000000000e+04	1.713038999999999942e+04	2.398447999999999956e+04	2.068368999999999869e+04	1.318043000000000029e+04	1.719672000000000116e+04	2.337261999999999898e+04	2.478340000000000146e+04	2.383845999999999913e+04	1.195178000000000065e+04	2.648531999999999971e+04	1.760949000000000160e+04	2.190754999999999927e+04	1.034918000000000029e+04	2.092854000000000087e+04	1.120502000000000044e+04	1.132805999999999949e+04	9.517239999999999782e+03	2.624931000000000131e+04	2.169625000000000000e+04	1.761227000000000044e+04	1.673734000000000015e+04	1.576870000000000073e+04	1.678847000000000116e+04	1.284071999999999935e+04	1.505659000000000015e+04	1.858058000000000175e+04	1.956633000000000175e+04	1.379379999999999927e+04	2.693813999999999942e+04	1.379379999999999927e+04	2.626138999999999942e+04	1.132805999999999949e+04	5.666289999999999964e+03	2.648531999999999971e+04	2.501856000000000131e+04	2.478340000000000146e+04	1.678847000000000116e+04	1.118354999999999927e+04	1.100159000000000015e+04	6.221100000000000364e+03
2.129025000000000000e+04	1.989325000000000000e+04	1.987463999999999942e+04	1.931634000000000015e+04	2.018086000000000058e+04	1.965945999999999913e+04	1.919036000000000058e+04	1.997215000000000146e+04	2.042300999999999840e+04	1.914738000000000102e+04	1.906281999999999971e+04	2.034266999999999825e+04	1.977186000000000058e+04	2.294258000000000175e+04	1.906399000000000160e+04	2.035511000000000058e+04	2.749318000000000029e+04	2.662368000000000029e+04	1.685224000000000160e+04	2.958313999999999942e+04	2.092074000000000160e+04	2.469808000000000175e+04	1.627732999999999993e+04	2.388563000000000102e+04	1.655249000000000160e+04	1.659640999999999985e+04	1.607280999999999949e+04	2.929000999999999840e+04	2.452979000000000087e+04	2.090727000000000044e+04	2.013970999999999913e+04	1.932443999999999869e+04	2.020250000000000000e+04	1.723884999999999854e+04	1.873559000000000015e+04	2.171691999999999825e+04	2.255625999999999840e+04	1.776681999999999971e+04	3.013783000000000175e+04	1.776681999999999971e+04	2.929284000000000015e+04	1.659640999999999985e+04	1.744031000000000131e+04	2.958313999999999942e+04	2.778606000000000131e+04	2.749318000000000029e+04	2.020250000000000000e+04	1.652741999999999825e+04	1.647059999999999854e+04	1.655777000000000044e+04
1.989008000000000175e+04	2.180479000000000087e+04	2.658525999999999840e+04	2.876781000000000131e+04	2.596266999999999825e+04	3.455616999999999825e+04	3.336138999999999942e+04	2.091365000000000146e+04	2.454693000000000029e+04	3.177020999999999913e+04	2.991420999999999913e+04	2.311879999999999927e+04	2.682393000000000029e+04	3.968094999999999709e+04	2.984475000000000000e+04	2.407283000000000175e+04	3.523723999999999796e+04	3.479783000000000175e+04	3.177159000000000015e+04	3.708536000000000058e+04	3.222577999999999884e+04	3.366780000000000291e+04	3.230720000000000073e+04	3.340655999999999767e+04	3.199279999999999927e+04	3.195075999999999840e+04	3.266220000000000073e+04	3.681675000000000000e+04	3.362351000000000204e+04	3.220179999999999927e+04	3.193443999999999869e+04	3.169874000000000160e+04	3.197702000000000044e+04	3.152288999999999942e+04	3.154493000000000029e+04	3.244302000000000044e+04	3.271952999999999884e+04	3.138170000000000073e+04	3.759048999999999796e+04	3.138170000000000073e+04	3.680655000000000291e+04	3.195075999999999840e+04	3.690479000000000087e+04	3.708536000000000058e+04	3.549443000000000029e+04	3.523723999999999796e+04	3.197702000000000044e+04	3.197833000000000175e+04	3.204954000000000087e+04	3.537159999999999854e+04
1.989484000000000015e+04	2.180477999999999884e+04	2.658038999999999942e+04	2.875949000000000160e+04	2.595904000000000087e+04	3.454087999999999738e+04	3.334698000000000320e+04	2.091463000000000102e+04	2.454525999999999840e+04	3.175788999999999942e+04	2.990406999999999971e+04	2.311841999999999825e+04	2.681861000000000058e+04	3.966352999999999884e+04	2.983470000000000073e+04	2.407152000000000044e+04	3.523516999999999825e+04	3.479480999999999767e+04	3.175522000000000116e+04	3.708441999999999825e+04	3.221600999999999840e+04	3.366286000000000058e+04	3.228906000000000131e+04	3.340051000000000204e+04	3.197559000000000015e+04	3.193368999999999869e+04	3.264316999999999825e+04	3.681566999999999825e+04	3.361833000000000175e+04	3.219204000000000087e+04	3.192365999999999985e+04	3.168681999999999971e+04	3.196629999999999927e+04	3.150752999999999884e+04	3.153216999999999825e+04	3.243438000000000102e+04	3.271202000000000044e+04	3.136745000000000073e+04	3.758980999999999767e+04	3.136745000000000073e+04	3.680548999999999796e+04	3.193368999999999869e+04	3.688105999999999767e+04	3.708441999999999825e+04	3.549252999999999884e+04	3.523516999999999825e+04	3.196629999999999927e+04	3.196109000000000015e+04	3.203211000000000058e+04	3.534901000000000204e+04
2.344009000000000015e+04	2.161956000000000131e+04	2.059802999999999884e+04	1.942486999999999898e+04	2.108154999999999927e+04	1.814277999999999884e+04	1.794493000000000029e+04	2.186674000000000160e+04	2.165336999999999898e+04	1.838370000000000073e+04	1.882022000000000116e+04	2.185286999999999898e+04	2.042681999999999971e+04	2.064009999999999854e+04	1.884093999999999869e+04	2.167634999999999854e+04	2.735434999999999854e+04	2.643895000000000073e+04	1.558396999999999935e+04	2.938279000000000087e+04	2.037038999999999942e+04	2.445231000000000131e+04	1.466982999999999993e+04	2.356297999999999956e+04	1.513187000000000080e+04	1.520195000000000073e+04	1.427435000000000036e+04	2.909954000000000087e+04	2.426579000000000087e+04	2.036100999999999840e+04	1.952297000000000116e+04	1.861734000000000015e+04	1.958568000000000029e+04	1.614595000000000073e+04	1.795665000000000146e+04	2.125483000000000175e+04	2.217288999999999942e+04	1.683679000000000087e+04	2.992022999999999956e+04	1.683679000000000087e+04	2.910513000000000102e+04	1.520195000000000073e+04	1.440995999999999913e+04	2.938279000000000087e+04	2.763813000000000102e+04	2.735434999999999854e+04	1.958568000000000029e+04	1.510563999999999942e+04	1.500859000000000015e+04	1.383529999999999927e+04
2.598827000000000044e+04	2.341459999999999854e+04	2.040836999999999898e+04	1.809290000000000146e+04	2.120727999999999884e+04	1.345887000000000080e+04	1.389154000000000087e+04	2.399386999999999898e+04	2.240729999999999927e+04	1.532788999999999942e+04	1.682641999999999825e+04	2.317295999999999913e+04	2.011443999999999869e+04	1.405594000000000051e+04	1.688595999999999913e+04	2.261797999999999956e+04	2.475113999999999942e+04	2.380188999999999942e+04	1.187976000000000022e+04	2.652859999999999854e+04	1.751404999999999927e+04	2.183831999999999971e+04	1.036393000000000029e+04	2.086302999999999884e+04	1.116770000000000073e+04	1.128409000000000015e+04	9.596079999999999927e+03	2.628186000000000058e+04	2.162890999999999985e+04	1.751456000000000131e+04	1.662913000000000102e+04	1.565107999999999993e+04	1.668356000000000131e+04	1.273167000000000007e+04	1.493145999999999913e+04	1.848634999999999854e+04	1.947563000000000102e+04	1.366181999999999971e+04	2.700081000000000131e+04	1.366181999999999971e+04	2.629284999999999854e+04	1.128409000000000015e+04	6.801199999999999818e+03	2.652859999999999854e+04	2.499749000000000160e+04	2.475113999999999942e+04	1.668356000000000131e+04	1.114427000000000044e+04	1.097359000000000015e+04	6.958079999999999927e+03
2.772938000000000102e+04	2.498854000000000087e+04	2.143784999999999854e+04	1.881054999999999927e+04	2.231579999999999927e+04	1.297955999999999949e+04	1.370187000000000080e+04	2.565281000000000131e+04	2.368479999999999927e+04	1.550238999999999942e+04	1.735406999999999971e+04	2.460820000000000073e+04	2.111258000000000175e+04	1.241160000000000036e+04	1.742570000000000073e+04	2.394947000000000116e+04	2.473900999999999840e+04	2.380106000000000131e+04	1.203007999999999993e+04	2.637100999999999840e+04	1.765290000000000146e+04	2.190568000000000029e+04	1.037994000000000051e+04	2.092790000000000146e+04	1.126514999999999964e+04	1.139188999999999942e+04	9.510280000000000655e+03	2.614488000000000102e+04	2.169370000000000073e+04	1.765759000000000015e+04	1.679766999999999825e+04	1.584454999999999927e+04	1.684561999999999898e+04	1.293868000000000029e+04	1.514492000000000007e+04	1.861686999999999898e+04	1.959404999999999927e+04	1.390029000000000087e+04	2.680595999999999913e+04	1.390029000000000087e+04	2.615784999999999854e+04	1.139188999999999942e+04	4.776579999999999927e+03	2.637100999999999840e+04	2.496383000000000175e+04	2.473900999999999840e+04	1.684561999999999898e+04	1.124569000000000051e+04	1.105713999999999942e+04	5.721600000000000364e+03
1.994711999999999898e+04	2.000781000000000131e+04	2.251722999999999956e+04	2.334733000000000175e+04	2.237168999999999869e+04	2.652541999999999825e+04	2.566656000000000131e+04	1.959318999999999869e+04	2.177677999999999884e+04	2.482665999999999985e+04	2.380927000000000044e+04	2.098131000000000131e+04	2.258263999999999942e+04	3.080765999999999985e+04	2.377331000000000131e+04	2.148713999999999942e+04	3.129070000000000073e+04	3.057658000000000175e+04	2.357100999999999840e+04	3.338048999999999796e+04	2.605002000000000044e+04	2.891765999999999985e+04	2.353888000000000102e+04	2.832352000000000044e+04	2.352438999999999942e+04	2.352620999999999913e+04	2.361068000000000029e+04	3.308366999999999825e+04	2.879934000000000015e+04	2.603024000000000160e+04	2.546338000000000102e+04	2.488779999999999927e+04	2.552033000000000175e+04	2.365041999999999825e+04	2.448195000000000073e+04	2.660890999999999985e+04	2.722374000000000160e+04	2.386420999999999913e+04	3.394005000000000291e+04	2.386420999999999913e+04	3.308048000000000320e+04	2.352620999999999913e+04	2.637836000000000058e+04	3.338048999999999796e+04	3.158345999999999913e+04	3.129070000000000073e+04	2.552033000000000175e+04	2.350331000000000131e+04	2.350968999999999869e+04	2.519315000000000146e+04
2.318470999999999913e+04	2.139663999999999942e+04	2.045945999999999913e+04	1.934038999999999942e+04	2.092800999999999840e+04	1.821729000000000087e+04	1.799070999999999913e+04	2.163040000000000146e+04	2.147199000000000160e+04	1.838134999999999854e+04	1.876781000000000131e+04	2.164806999999999971e+04	2.029409999999999854e+04	2.080340000000000146e+04	1.878668999999999869e+04	2.148725999999999840e+04	2.730268999999999869e+04	2.639083000000000175e+04	1.562722999999999956e+04	2.933861000000000058e+04	2.035031000000000131e+04	2.440802999999999884e+04	1.474695000000000073e+04	2.352508000000000175e+04	1.519010000000000036e+04	1.525756999999999971e+04	1.437136000000000058e+04	2.905420999999999913e+04	2.422304999999999927e+04	2.034052000000000044e+04	1.950806999999999971e+04	1.860979999999999927e+04	1.957088999999999942e+04	1.617232999999999993e+04	1.795502000000000044e+04	2.122745000000000073e+04	2.213913000000000102e+04	1.684808000000000175e+04	2.987809000000000015e+04	1.684808000000000175e+04	2.905952999999999884e+04	1.525756999999999971e+04	1.465223999999999978e+04	2.933861000000000058e+04	2.758756999999999971e+04	2.730268999999999869e+04	1.957088999999999942e+04	1.516392000000000007e+04	1.507090999999999985e+04	1.403846999999999935e+04
1.994711999999999898e+04	2.000781000000000131e+04	2.251722999999999956e+04	2.334733000000000175e+04	2.237168999999999869e+04	2.652541999999999825e+04	2.566656000000000131e+04	1.959318999999999869e+04	2.177677999999999884e+04	2.482665999999999985e+04	2.380927000000000044e+04	2.098131000000000131e+04	2.258263999999999942e+04	3.080765999999999985e+04	2.377331000000000131e+04	2.148713999999999942e+04	3.129070000000000073e+04	3.057658000000000175e+04	2.357100999999999840e+04	3.338048999999999796e+04	2.605002000000000044e+04	2.891765999999999985e+04	2.353888000000000102e+04	2.832352000000000044e+04	2.352438999999999942e+04	2.352620999999999913e+04	2.361068000000000029e+04	3.308366999999999825e+04	2.879934000000000015e+04	2.603024000000000160e+04	2.546338000000000102e+04	2.488779999999999927e+04	2.552033000000000175e+04	2.365041999999999825e+04	2.448195000000000073e+04	2.660890999999999985e+04	2.722374000000000160e+04	2.386420999999999913e+04	3.394005000000000291e+04	2.386420999999999913e+04	3.308048000000000320e+04	2.352620999999999913e+04	2.637836000000000058e+04	3.338048999999999796e+04	3.158345999999999913e+04	3.129070000000000073e+04	2.552033000000000175e+04	2.350331000000000131e+04	2.350968999999999869e+04	2.519315000000000146e+04
2.192697000000000116e+04	2.087952999999999884e+04	2.148738000000000102e+04	2.123913000000000102e+04	2.169104999999999927e+04	2.212956999999999971e+04	2.159595999999999913e+04	2.083259000000000015e+04	2.173325000000000000e+04	2.140997000000000116e+04	2.113688999999999942e+04	2.147231999999999971e+04	2.142256000000000131e+04	2.554081000000000131e+04	2.113024000000000160e+04	2.160893999999999869e+04	2.945161999999999898e+04	2.860775000000000000e+04	1.928050000000000000e+04	3.155622000000000116e+04	2.309365999999999985e+04	2.672152000000000044e+04	1.878565000000000146e+04	2.594681999999999971e+04	1.901925999999999840e+04	1.905688000000000102e+04	1.861736000000000058e+04	3.126040000000000146e+04	2.656208000000000175e+04	2.307881999999999971e+04	2.234329999999999927e+04	2.156656000000000131e+04	2.240556000000000131e+04	1.961788000000000102e+04	2.100690000000000146e+04	2.385018999999999869e+04	2.465215000000000146e+04	2.009427000000000044e+04	3.211547000000000116e+04	2.009427000000000044e+04	3.126200000000000000e+04	1.905688000000000102e+04	2.005290999999999985e+04	3.155622000000000116e+04	2.974665999999999985e+04	2.945161999999999898e+04	2.240556000000000131e+04	1.899463000000000102e+04	1.894720000000000073e+04	1.918459000000000015e+04
2.276258000000000175e+04	2.103540000000000146e+04	2.025256999999999971e+04	1.923125000000000000e+04	2.069374000000000160e+04	1.838672999999999956e+04	1.811100999999999840e+04	2.124424000000000160e+04	2.118688000000000102e+04	1.841781999999999971e+04	1.871604000000000087e+04	2.132004000000000087e+04	2.009786000000000058e+04	2.112134999999999854e+04	1.873166999999999825e+04	2.118806000000000131e+04	2.724683000000000175e+04	2.634163000000000102e+04	1.574581999999999971e+04	2.929509999999999854e+04	2.035406999999999971e+04	2.436659999999999854e+04	1.492471999999999935e+04	2.349536999999999898e+04	1.533497999999999956e+04	1.539788999999999942e+04	1.458344000000000051e+04	2.900877000000000044e+04	2.418443999999999869e+04	2.034356999999999971e+04	1.952156999999999971e+04	1.863697999999999956e+04	1.958452999999999884e+04	1.626111000000000058e+04	1.799316999999999825e+04	2.121774000000000160e+04	2.211758000000000175e+04	1.690988999999999942e+04	2.983795999999999913e+04	1.690988999999999942e+04	2.901363999999999942e+04	1.539788999999999942e+04	1.510447999999999956e+04	2.929509999999999854e+04	2.753354000000000087e+04	2.724683000000000175e+04	1.958452999999999884e+04	1.530894000000000051e+04	1.522297999999999956e+04	1.442771999999999935e+04
2.126390000000000146e+04	1.989415000000000146e+04	1.993068999999999869e+04	1.940265999999999985e+04	2.022750999999999840e+04	1.981059999999999854e+04	1.933233000000000175e+04	1.996279999999999927e+04	2.045179999999999927e+04	1.927118000000000029e+04	1.916508000000000175e+04	2.035581000000000131e+04	1.983145999999999913e+04	2.311665000000000146e+04	1.916538999999999942e+04	2.037891999999999825e+04	2.758522999999999956e+04	2.671820999999999913e+04	1.699693999999999869e+04	2.967702999999999884e+04	2.103447999999999956e+04	2.479634000000000015e+04	1.643393999999999869e+04	2.398772999999999956e+04	1.670270999999999913e+04	1.674568999999999869e+04	1.623555999999999949e+04	2.938358000000000175e+04	2.462895000000000073e+04	2.102086000000000058e+04	2.025679000000000087e+04	1.944583000000000175e+04	2.031952999999999884e+04	1.737690000000000146e+04	1.886034999999999854e+04	2.182640000000000146e+04	2.266181999999999971e+04	1.789829000000000087e+04	3.023227999999999884e+04	1.789829000000000087e+04	2.938629000000000087e+04	1.674568999999999869e+04	1.763208000000000175e+04	2.967702999999999884e+04	2.787838999999999942e+04	2.758522999999999956e+04	2.031952999999999884e+04	1.667770000000000073e+04	1.662227999999999884e+04	1.674411999999999898e+04
1.933700999999999840e+04	2.112145999999999913e+04	2.577872999999999956e+04	2.788225999999999840e+04	2.518586999999999898e+04	3.353097000000000116e+04	3.235240000000000146e+04	2.025684000000000015e+04	2.381893999999999869e+04	3.080118000000000029e+04	2.898984999999999854e+04	2.242475999999999840e+04	2.600681999999999971e+04	3.861863999999999942e+04	2.892220999999999913e+04	2.335418999999999869e+04	3.449372000000000116e+04	3.403126000000000204e+04	3.072790000000000146e+04	3.636906999999999971e+04	3.130816999999999825e+04	3.285643000000000029e+04	3.123399000000000160e+04	3.256984000000000015e+04	3.093493000000000029e+04	3.089518000000000029e+04	3.157497000000000116e+04	3.609706999999999971e+04	3.280652999999999884e+04	3.128436000000000058e+04	3.099616999999999825e+04	3.073770999999999913e+04	3.103986999999999898e+04	3.049702999999999884e+04	3.056752999999999884e+04	3.154933000000000175e+04	3.185040000000000146e+04	3.037609999999999854e+04	3.688066999999999825e+04	3.037609999999999854e+04	3.608736000000000058e+04	3.089518000000000029e+04	3.575309999999999854e+04	3.636906999999999971e+04	3.475487000000000262e+04	3.449372000000000116e+04	3.103986999999999898e+04	3.092004999999999927e+04	3.098793000000000029e+04	3.423384999999999854e+04
2.757515000000000146e+04	2.485779999999999927e+04	2.138293999999999869e+04	1.879604000000000087e+04	2.225056000000000131e+04	1.311513999999999942e+04	1.380067000000000007e+04	2.550979999999999927e+04	2.359652999999999884e+04	1.555640999999999985e+04	1.736349000000000160e+04	2.449768999999999869e+04	2.106174000000000160e+04	1.269679000000000087e+04	1.743358000000000175e+04	2.385359000000000015e+04	2.483070999999999913e+04	2.389043000000000029e+04	1.207761000000000058e+04	2.648333000000000175e+04	1.771586000000000058e+04	2.198402000000000044e+04	1.043884000000000015e+04	2.100545999999999913e+04	1.131690999999999985e+04	1.144275000000000000e+04	9.578500000000000000e+03	2.625429999999999927e+04	2.177215000000000146e+04	1.772000000000000000e+04	1.685511000000000058e+04	1.589671999999999935e+04	1.690402000000000044e+04	1.298155999999999949e+04	1.519285000000000036e+04	1.868249000000000160e+04	1.966270000000000073e+04	1.394170999999999913e+04	2.692350999999999840e+04	1.394170999999999913e+04	2.626702000000000044e+04	1.144275000000000000e+04	5.080729999999999563e+03	2.648333000000000175e+04	2.505859000000000015e+04	2.483070999999999913e+04	1.690402000000000044e+04	1.129682999999999993e+04	1.110992000000000007e+04	5.919859999999999673e+03
2.166918000000000029e+04	2.385913999999999942e+04	2.888699000000000160e+04	3.123775000000000000e+04	2.820063999999999942e+04	3.732268000000000029e+04	3.609400000000000000e+04	2.291613999999999942e+04	2.668283000000000175e+04	3.441762999999999738e+04	3.246700000000000000e+04	2.518743999999999869e+04	2.914829999999999927e+04	4.252370999999999913e+04	3.239370999999999913e+04	2.619054000000000087e+04	3.736409999999999854e+04	3.697948999999999796e+04	3.458184999999999854e+04	3.914323999999999796e+04	3.475808000000000175e+04	3.595588999999999942e+04	3.518015000000000146e+04	3.575329000000000087e+04	3.483326999999999680e+04	3.478637999999999738e+04	3.556462999999999738e+04	3.888337000000000262e+04	3.592458999999999651e+04	3.473377999999999884e+04	3.451341999999999825e+04	3.432861000000000058e+04	3.455341999999999825e+04	3.429495999999999913e+04	3.421118000000000029e+04	3.492119000000000233e+04	3.514166000000000349e+04	3.410995999999999913e+04	3.963175000000000000e+04	3.410995999999999913e+04	3.887201000000000204e+04	3.478637999999999738e+04	3.993943000000000029e+04	3.914323999999999796e+04	3.761130999999999767e+04	3.736409999999999854e+04	3.455341999999999825e+04	3.481968000000000029e+04	3.489795999999999913e+04	3.837819999999999709e+04
1.880550000000000000e+04	1.905236000000000058e+04	2.187922000000000116e+04	2.291258000000000175e+04	2.166872999999999956e+04	2.655652000000000044e+04	2.562950999999999840e+04	1.857925999999999840e+04	2.096256999999999971e+04	2.465104999999999927e+04	2.348554000000000087e+04	2.008050000000000000e+04	2.196900999999999840e+04	3.102604999999999927e+04	2.344386999999999898e+04	2.064640999999999985e+04	3.072800999999999840e+04	3.004472000000000116e+04	2.360786000000000058e+04	3.280154000000000087e+04	2.576150000000000000e+04	2.844434000000000015e+04	2.368638000000000102e+04	2.789211000000000058e+04	2.361236999999999898e+04	2.360566999999999825e+04	2.381654999999999927e+04	3.250631000000000131e+04	2.833536999999999898e+04	2.574086999999999898e+04	2.521615000000000146e+04	2.469056000000000131e+04	2.527134999999999854e+04	2.362665000000000146e+04	2.432309000000000015e+04	2.627281999999999971e+04	2.684250999999999840e+04	2.377827000000000044e+04	3.335787999999999738e+04	2.377827000000000044e+04	3.250218999999999869e+04	2.360566999999999825e+04	2.693229000000000087e+04	3.280154000000000087e+04	3.101834000000000015e+04	3.072800999999999840e+04	2.527134999999999854e+04	2.359238999999999942e+04	2.361152999999999884e+04	2.565765000000000146e+04
1.991113999999999942e+04	2.182440000000000146e+04	2.660309999999999854e+04	2.878420000000000073e+04	2.598099000000000160e+04	3.456912000000000262e+04	3.337481999999999971e+04	2.093359000000000015e+04	2.456597000000000116e+04	3.178472000000000116e+04	2.992977000000000044e+04	2.313829000000000087e+04	2.684159000000000015e+04	3.969269999999999709e+04	2.986034999999999854e+04	2.409200000000000000e+04	3.525613999999999942e+04	3.481637999999999738e+04	3.178395000000000073e+04	3.710466000000000349e+04	3.224150999999999840e+04	3.368561000000000058e+04	3.231852999999999884e+04	3.342391999999999825e+04	3.200468000000000029e+04	3.196272000000000116e+04	3.267299000000000160e+04	3.683600000000000000e+04	3.364123000000000320e+04	3.221754000000000087e+04	3.194970000000000073e+04	3.171343999999999869e+04	3.199231000000000131e+04	3.153581000000000131e+04	3.155920999999999913e+04	3.245927000000000044e+04	3.273627999999999884e+04	3.139522000000000116e+04	3.760987999999999738e+04	3.139522000000000116e+04	3.682580999999999767e+04	3.196272000000000116e+04	3.691247000000000116e+04	3.710466000000000349e+04	3.551338999999999942e+04	3.525613999999999942e+04	3.199231000000000131e+04	3.199018999999999869e+04	3.206129000000000087e+04	3.538008000000000175e+04
9.041520000000000437e+03	9.261920000000000073e+03	1.288427000000000044e+04	1.471798999999999978e+04	1.245121999999999935e+04	2.052679999999999927e+04	1.928290999999999985e+04	8.737489999999999782e+03	1.143038999999999942e+04	1.762540000000000146e+04	1.578338999999999942e+04	1.036794000000000051e+04	1.306287000000000080e+04	2.580875000000000000e+04	1.571632999999999993e+04	1.105378000000000065e+04	2.178275000000000000e+04	2.121929000000000087e+04	1.783768000000000029e+04	2.377163000000000102e+04	1.810390999999999985e+04	1.987536999999999898e+04	1.856193000000000029e+04	1.950822999999999956e+04	1.814072000000000116e+04	1.808445999999999913e+04	1.903299000000000160e+04	2.348550000000000000e+04	1.980631000000000131e+04	1.808018999999999869e+04	1.778995999999999913e+04	1.754986000000000058e+04	1.783334000000000015e+04	1.750720000000000073e+04	1.740784999999999854e+04	1.836683000000000175e+04	1.870941999999999825e+04	1.729843000000000029e+04	2.431049000000000160e+04	1.729843000000000029e+04	2.347845000000000073e+04	1.808445999999999913e+04	2.409459999999999854e+04	2.377163000000000102e+04	2.206008000000000175e+04	2.178275000000000000e+04	1.783334000000000015e+04	1.812900999999999840e+04	1.822179000000000087e+04	2.233583000000000175e+04
1.439285000000000036e+04	1.347190999999999985e+04	1.489654000000000087e+04	1.542345999999999913e+04	1.490062000000000080e+04	1.875000999999999840e+04	1.780466999999999825e+04	1.335385000000000036e+04	1.463598999999999978e+04	1.685343000000000029e+04	1.582079999999999927e+04	1.417564999999999964e+04	1.491254000000000087e+04	2.336147000000000116e+04	1.578654000000000087e+04	1.444320000000000073e+04	2.348109000000000015e+04	2.272984999999999854e+04	1.580798999999999978e+04	2.558613999999999942e+04	1.805456000000000131e+04	2.101256999999999971e+04	1.597161000000000058e+04	2.038431999999999971e+04	1.584470000000000073e+04	1.583178000000000065e+04	1.616937000000000080e+04	2.528806999999999971e+04	2.088591999999999825e+04	1.803484000000000015e+04	1.746900000000000000e+04	1.690552999999999884e+04	1.752575000000000000e+04	1.580486000000000058e+04	1.651713999999999942e+04	1.862206000000000131e+04	1.925465000000000146e+04	1.595254999999999927e+04	2.614841999999999825e+04	1.595254999999999927e+04	2.528618999999999869e+04	1.583178000000000065e+04	1.996700000000000000e+04	2.558613999999999942e+04	2.377611000000000058e+04	2.348109000000000015e+04	1.752575000000000000e+04	1.582560000000000036e+04	1.585473999999999978e+04	1.847672999999999956e+04
6.464180000000000291e+03	8.090270000000000437e+03	1.310417000000000007e+04	1.566172999999999956e+04	1.238507999999999993e+04	2.259316999999999825e+04	2.123752999999999884e+04	7.206029999999999745e+03	1.086734000000000015e+04	1.926381999999999971e+04	1.706231000000000131e+04	9.407430000000000291e+03	1.338320999999999913e+04	2.807931999999999971e+04	1.698022999999999956e+04	1.038161000000000058e+04	2.155936999999999898e+04	2.115850000000000000e+04	2.016761999999999898e+04	2.337940999999999985e+04	1.927163000000000102e+04	2.014911000000000058e+04	2.114959000000000015e+04	1.998315000000000146e+04	2.059561000000000058e+04	2.051945000000000073e+04	2.174009000000000015e+04	2.311322000000000116e+04	2.012402999999999884e+04	1.924688999999999942e+04	1.914654999999999927e+04	1.911736000000000058e+04	1.917895999999999913e+04	1.967927999999999884e+04	1.912943000000000029e+04	1.932350999999999840e+04	1.945468000000000029e+04	1.928634000000000015e+04	2.388074000000000160e+04	1.928634000000000015e+04	2.310265999999999985e+04	2.051945000000000073e+04	2.729652999999999884e+04	2.337940999999999985e+04	2.181118999999999869e+04	2.155936999999999898e+04	1.917895999999999913e+04	2.058831000000000131e+04	2.070975999999999840e+04	2.543990000000000146e+04
1.158415999999999985e+04	1.107005999999999949e+04	1.346478000000000065e+04	1.462187000000000080e+04	1.327118000000000029e+04	1.926449000000000160e+04	1.815040000000000146e+04	1.079512999999999920e+04	1.267012999999999920e+04	1.681902000000000044e+04	1.535729999999999927e+04	1.194894000000000051e+04	1.355592000000000007e+04	2.427215000000000146e+04	1.530595999999999913e+04	1.239522999999999956e+04	2.232315999999999985e+04	2.165318999999999869e+04	1.641472000000000116e+04	2.439147000000000116e+04	1.767481000000000131e+04	2.009463000000000102e+04	1.688352000000000044e+04	1.958402999999999884e+04	1.659520999999999913e+04	1.655872000000000116e+04	1.723324000000000160e+04	2.409666999999999825e+04	1.999402000000000044e+04	1.765279000000000087e+04	1.721588000000000102e+04	1.680677000000000044e+04	1.726684000000000015e+04	1.623712000000000080e+04	1.653784999999999854e+04	1.810006999999999971e+04	1.859968000000000029e+04	1.619957999999999993e+04	2.494699000000000160e+04	1.619957999999999993e+04	2.409234999999999854e+04	1.655872000000000116e+04	2.176400999999999840e+04	2.439147000000000116e+04	2.261256999999999971e+04	2.232315999999999985e+04	1.726684000000000015e+04	1.657981000000000131e+04	1.664379000000000087e+04	2.011404000000000087e+04
1.845720000000000073e+04	1.720736999999999898e+04	1.766643000000000029e+04	1.748206999999999971e+04	1.787258000000000175e+04	1.896850999999999840e+04	1.830115999999999985e+04	1.722413000000000102e+04	1.794659999999999854e+04	1.790375999999999840e+04	1.746140000000000146e+04	1.774090000000000146e+04	1.760338999999999942e+04	2.284300000000000000e+04	1.744954000000000087e+04	1.783693000000000029e+04	2.569604999999999927e+04	2.486447999999999956e+04	1.605039999999999964e+04	2.780459000000000015e+04	1.948768999999999869e+04	2.300086000000000058e+04	1.576143000000000029e+04	2.224941999999999825e+04	1.587903000000000065e+04	1.590098999999999978e+04	1.571873999999999978e+04	2.750790999999999985e+04	2.284654999999999927e+04	1.947168000000000029e+04	1.876902999999999884e+04	1.803615000000000146e+04	1.883049000000000160e+04	1.629105999999999949e+04	1.751345999999999913e+04	2.020849000000000160e+04	2.098052999999999884e+04	1.668161999999999898e+04	2.836525999999999840e+04	1.668161999999999898e+04	2.750899000000000160e+04	1.590098999999999978e+04	1.816786000000000058e+04	2.780459000000000015e+04	2.599166999999999825e+04	2.569604999999999927e+04	1.883049000000000160e+04	1.585577000000000044e+04	1.583248999999999978e+04	1.699911000000000058e+04
1.072563999999999942e+04	1.042211000000000058e+04	1.321426000000000022e+04	1.459880999999999949e+04	1.294292000000000007e+04	1.965034000000000015e+04	1.848918999999999869e+04	1.007196999999999935e+04	1.220611000000000058e+04	1.704313000000000102e+04	1.544761000000000058e+04	1.137534000000000015e+04	1.333412999999999920e+04	2.476045000000000073e+04	1.539077000000000044e+04	1.189790999999999985e+04	2.211965999999999985e+04	2.148263000000000102e+04	1.684715999999999985e+04	2.416661000000000058e+04	1.777570999999999913e+04	1.998975999999999840e+04	1.740527000000000044e+04	1.952456999999999971e+04	1.707034000000000015e+04	1.702693000000000029e+04	1.779777000000000044e+04	2.387404999999999927e+04	1.989915999999999985e+04	1.775304000000000087e+04	1.736347999999999956e+04	1.700952999999999884e+04	1.741209000000000015e+04	1.661656999999999971e+04	1.678238000000000102e+04	1.814858000000000175e+04	1.859804000000000087e+04	1.652045000000000073e+04	2.471779000000000087e+04	1.652045000000000073e+04	2.386883000000000175e+04	1.702693000000000029e+04	2.251890000000000146e+04	2.416661000000000058e+04	2.240581999999999971e+04	2.211965999999999985e+04	1.741209000000000015e+04	1.705615999999999985e+04	1.713025000000000000e+04	2.082954999999999927e+04
9.319969999999999345e+03	9.441750000000000000e+03	1.292352000000000044e+04	1.468319000000000051e+04	1.251789999999999964e+04	2.037102000000000044e+04	1.913997000000000116e+04	8.948659999999999854e+03	1.154531999999999971e+04	1.751624000000000160e+04	1.571345000000000073e+04	1.052237000000000080e+04	1.309225000000000000e+04	2.562709999999999854e+04	1.564803000000000065e+04	1.118017000000000007e+04	2.183354000000000087e+04	2.125700999999999840e+04	1.766093000000000029e+04	2.383368999999999869e+04	1.803795000000000073e+04	1.988643000000000029e+04	1.835840999999999985e+04	1.950218000000000029e+04	1.795106000000000131e+04	1.789688000000000102e+04	1.881688999999999942e+04	2.354629000000000087e+04	1.981361000000000058e+04	1.801438000000000102e+04	1.770711000000000058e+04	1.744763999999999942e+04	1.775140999999999985e+04	1.734663999999999942e+04	1.729124000000000160e+04	1.831975000000000000e+04	1.868083000000000175e+04	1.715631999999999971e+04	2.437497000000000116e+04	1.715631999999999971e+04	2.353954000000000087e+04	1.789688000000000102e+04	2.382470999999999913e+04	2.383368999999999869e+04	2.211259000000000015e+04	2.183354000000000087e+04	1.775140999999999985e+04	1.793893999999999869e+04	1.802872000000000116e+04	2.207681999999999971e+04
8.273620000000000800e+03	8.768209999999999127e+03	1.275684000000000015e+04	1.478392000000000007e+04	1.225120000000000073e+04	2.090709999999999854e+04	1.963020000000000073e+04	8.159510000000000218e+03	1.110355999999999949e+04	1.788436999999999898e+04	1.594088999999999942e+04	9.938100000000000364e+03	1.296142000000000007e+04	2.625397999999999956e+04	1.586962000000000080e+04	1.069744000000000051e+04	2.160252000000000044e+04	2.107513999999999942e+04	1.827902000000000044e+04	2.355845999999999913e+04	1.824522999999999956e+04	1.980534000000000015e+04	1.907481000000000131e+04	1.948504999999999927e+04	1.861654999999999927e+04	1.855477000000000044e+04	1.957949000000000160e+04	2.327611999999999898e+04	1.974652999999999884e+04	1.822115000000000146e+04	1.797754999999999927e+04	1.779024000000000160e+04	1.801834000000000015e+04	1.790529000000000087e+04	1.768736000000000058e+04	1.845665000000000146e+04	1.874859999999999854e+04	1.764702000000000044e+04	2.409015999999999985e+04	1.764702000000000044e+04	2.326822999999999956e+04	1.855477000000000044e+04	2.478495999999999913e+04	2.355845999999999913e+04	2.187484999999999854e+04	2.160252000000000044e+04	1.801834000000000015e+04	1.860599000000000160e+04	1.870677000000000044e+04	2.299706000000000131e+04
1.091395000000000073e+04	1.056571999999999935e+04	1.327436000000000058e+04	1.461096999999999935e+04	1.301948999999999978e+04	1.957654999999999927e+04	1.842525000000000000e+04	1.023147999999999956e+04	1.231131999999999971e+04	1.700336999999999898e+04	1.543590999999999985e+04	1.150354999999999927e+04	1.338814999999999964e+04	2.466538000000000102e+04	1.538021999999999935e+04	1.201007999999999993e+04	2.217243999999999869e+04	2.152829000000000087e+04	1.676265000000000146e+04	2.422427999999999884e+04	1.776254000000000087e+04	2.002111999999999898e+04	1.730168000000000029e+04	1.954613000000000102e+04	1.697670999999999913e+04	1.693477999999999884e+04	1.768502999999999884e+04	2.393120000000000073e+04	1.992836000000000058e+04	1.774000999999999840e+04	1.734020000000000073e+04	1.697433000000000175e+04	1.738933000000000175e+04	1.654338000000000102e+04	1.673815999999999985e+04	1.814672999999999956e+04	1.860702000000000044e+04	1.645979000000000087e+04	2.477645999999999913e+04	1.645979000000000087e+04	2.392616999999999825e+04	1.693477999999999884e+04	2.236531999999999971e+04	2.422427999999999884e+04	2.245934999999999854e+04	2.217243999999999869e+04	1.738933000000000175e+04	1.696225999999999840e+04	1.703418999999999869e+04	2.068445000000000073e+04
2.156183000000000175e+04	2.011508000000000175e+04	1.998154999999999927e+04	1.935179000000000087e+04	2.030861999999999898e+04	1.951111000000000058e+04	1.907175999999999840e+04	2.021327999999999884e+04	2.058890999999999985e+04	1.908318999999999869e+04	1.905768000000000029e+04	2.054045000000000073e+04	1.987072999999999956e+04	2.270943000000000029e+04	1.906106999999999971e+04	2.053129999999999927e+04	2.751213999999999942e+04	2.663650999999999840e+04	1.672588000000000102e+04	2.959708000000000175e+04	2.088413000000000102e+04	2.470172000000000116e+04	1.611157999999999993e+04	2.387947000000000116e+04	1.640829999999999927e+04	1.645525999999999840e+04	1.588529999999999927e+04	2.930481000000000131e+04	2.453113999999999942e+04	2.087109999999999854e+04	2.009415000000000146e+04	1.926702999999999884e+04	2.015704000000000087e+04	1.713315999999999985e+04	1.866881000000000131e+04	2.169168999999999869e+04	2.254129999999999927e+04	1.768077000000000044e+04	3.015029000000000087e+04	1.768077000000000044e+04	2.930795999999999913e+04	1.645525999999999840e+04	1.711743999999999869e+04	2.959708000000000175e+04	2.780427999999999884e+04	2.751213999999999942e+04	2.015704000000000087e+04	1.638304000000000087e+04	1.632157999999999993e+04	1.626854999999999927e+04
1.001242000000000007e+04	9.915239999999999782e+03	1.305744000000000051e+04	1.463437999999999920e+04	1.271807999999999993e+04	2.001636999999999898e+04	1.881850999999999840e+04	9.494370000000000800e+03	1.186179999999999927e+04	1.728022999999999956e+04	1.557685000000000036e+04	1.093371999999999935e+04	1.320217000000000007e+04	2.520409999999999854e+04	1.551554999999999927e+04	1.152454000000000087e+04	2.197754999999999927e+04	2.137049000000000160e+04	1.725800000000000000e+04	2.400245999999999913e+04	1.790647000000000116e+04	1.993793000000000029e+04	1.788800000000000000e+04	1.951315000000000146e+04	1.751568000000000029e+04	1.746670999999999913e+04	1.831461000000000058e+04	2.371229000000000087e+04	1.985622000000000116e+04	1.788331000000000131e+04	1.753506999999999971e+04	1.722875000000000000e+04	1.758154999999999927e+04	1.698433000000000175e+04	1.703736000000000058e+04	1.823359000000000015e+04	1.863879999999999927e+04	1.683993000000000029e+04	2.454902000000000044e+04	1.683993000000000029e+04	2.370629999999999927e+04	1.746670999999999913e+04	2.318456000000000131e+04	2.400245999999999913e+04	2.226036000000000058e+04	2.197754999999999927e+04	1.758154999999999927e+04	1.750254000000000087e+04	1.758472999999999956e+04	2.146475999999999840e+04
2.261408000000000175e+04	2.111847000000000116e+04	2.082750999999999840e+04	2.007556999999999971e+04	2.118677000000000044e+04	1.983597000000000116e+04	1.947061999999999898e+04	2.123734000000000015e+04	2.152206999999999971e+04	1.960670000000000073e+04	1.970427999999999884e+04	2.151527000000000044e+04	2.070388999999999942e+04	2.279763000000000102e+04	1.971208000000000175e+04	2.147840999999999985e+04	2.819677000000000044e+04	2.730993999999999869e+04	1.711138999999999942e+04	3.027054999999999927e+04	2.146383000000000175e+04	2.535883000000000175e+04	1.640018999999999869e+04	2.451790999999999985e+04	1.675088000000000102e+04	1.680525999999999840e+04	1.611712999999999920e+04	2.998015999999999985e+04	2.518390000000000146e+04	2.145175000000000000e+04	2.065613000000000102e+04	1.980497000000000116e+04	2.071915000000000146e+04	1.756684000000000015e+04	1.918740000000000146e+04	2.229393000000000029e+04	2.316347999999999956e+04	1.815838000000000102e+04	3.082052000000000044e+04	1.815838000000000102e+04	2.998390999999999985e+04	1.680525999999999840e+04	1.692340000000000146e+04	3.027054999999999927e+04	2.848727000000000044e+04	2.819677000000000044e+04	2.071915000000000146e+04	1.672520000000000073e+04	1.665227999999999884e+04	1.619495999999999913e+04
2.633990000000000146e+04	2.471697999999999956e+04	2.399277999999999884e+04	2.289781999999999971e+04	2.444056999999999971e+04	2.145704000000000087e+04	2.132954999999999927e+04	2.489070000000000073e+04	2.492772999999999956e+04	2.184390000000000146e+04	2.230599000000000160e+04	2.503547999999999956e+04	2.383374000000000160e+04	2.359461000000000058e+04	2.232659999999999854e+04	2.492277000000000044e+04	3.084015999999999985e+04	2.992459999999999854e+04	1.897725000000000000e+04	3.286787000000000262e+04	2.384549000000000160e+04	2.793750000000000000e+04	1.798559000000000015e+04	2.704668000000000029e+04	1.849388000000000102e+04	1.856972999999999956e+04	1.753300000000000000e+04	3.258481999999999971e+04	2.775070000000000073e+04	2.383640000000000146e+04	2.299443000000000029e+04	2.208265999999999985e+04	2.305702999999999884e+04	1.956906999999999971e+04	2.141627999999999884e+04	2.473427000000000044e+04	2.565520999999999913e+04	2.028163000000000102e+04	3.340487000000000262e+04	2.028163000000000102e+04	3.259045000000000073e+04	1.856972999999999956e+04	1.688902000000000044e+04	3.286787000000000262e+04	3.112390999999999985e+04	3.084015999999999985e+04	2.305702999999999884e+04	1.846756999999999971e+04	1.836122999999999956e+04	1.660565999999999985e+04
1.001242000000000007e+04	9.915239999999999782e+03	1.305744000000000051e+04	1.463437999999999920e+04	1.271807999999999993e+04	2.001636999999999898e+04	1.881850999999999840e+04	9.494370000000000800e+03	1.186179999999999927e+04	1.728022999999999956e+04	1.557685000000000036e+04	1.093371999999999935e+04	1.320217000000000007e+04	2.520409999999999854e+04	1.551554999999999927e+04	1.152454000000000087e+04	2.197754999999999927e+04	2.137049000000000160e+04	1.725800000000000000e+04	2.400245999999999913e+04	1.790647000000000116e+04	1.993793000000000029e+04	1.788800000000000000e+04	1.951315000000000146e+04	1.751568000000000029e+04	1.746670999999999913e+04	1.831461000000000058e+04	2.371229000000000087e+04	1.985622000000000116e+04	1.788331000000000131e+04	1.753506999999999971e+04	1.722875000000000000e+04	1.758154999999999927e+04	1.698433000000000175e+04	1.703736000000000058e+04	1.823359000000000015e+04	1.863879999999999927e+04	1.683993000000000029e+04	2.454902000000000044e+04	1.683993000000000029e+04	2.370629999999999927e+04	1.746670999999999913e+04	2.318456000000000131e+04	2.400245999999999913e+04	2.226036000000000058e+04	2.197754999999999927e+04	1.758154999999999927e+04	1.750254000000000087e+04	1.758472999999999956e+04	2.146475999999999840e+04
[truncated: 178 more columns]
