# Supplementary material
Source: ML conference proceedings conference paper supplement (https://proceedings.neurips.cc/paper_files/paper/2022/hash/7b102c908e9404dd040599c65db4ce3e-Abstract.html)
Supplement: Supplementary file 1 [file 7b102c908e9404dd040599c65db4ce3e-Supplemental-Conference.zip › 663_multivariate_time_series_forec-Supplementary Material/code/main.py]

import torch
import torch.nn as nn
import numpy as np
import pandas as pd
import random
import models
import sys
import os
import os.path
from models import predict
from data import STAGNN_Dataset
from torch.utils.tensorboard import SummaryWriter
from utils.utils import evaluate_metric, weight_matrix
from config import DefaultConfig, Logger


opt = DefaultConfig()

sys.stdout = Logger(opt.record_path)

# random seed
seed = opt.seed
torch.manual_seed(seed)
torch.cuda.manual_seed(seed)
np.random.seed(seed)
random.seed(seed)
torch.backends.cudnn.deterministic = True

os.environ['CUDA_VISIBLE_DEVICES'] = str(opt.device)


def test(model, loss_fn, test_iter, opt):
    model.eval()
    loss_sum, n = 0.0, 0
    for x, y in test_iter:
        x, y = x.cuda(), y.cuda()
        x = x.type(torch.cuda.FloatTensor)
        y = y.type(torch.cuda.FloatTensor)
        
        y_pred = predict(model, x, y, opt)
        # y_pred = predict_2(model, x, y, opt)
        
        loss = loss_fn(y_pred, y)
        loss_sum += loss.item()
        n += 1
    return loss_sum / n


def train(**kwargs):
    opt.parse(kwargs)

    # adj matrix
    if opt.adj_matrix_path != None:
        opt.dis_mat = weight_matrix(opt.adj_matrix_path, epsilon=opt.eps)
        opt.dis_mat = torch.from_numpy(opt.dis_mat).float().cuda()
    else:
        opt.dis_mat = 0.0

    # path
    opt.prefix = 'log/' + opt.name + '/'
    if not os.path.exists(opt.prefix):
        os.makedirs(opt.prefix)
    opt.checkpoint_temp_path = opt.prefix + '/temp.pth'
    opt.checkpoint_best_path = opt.prefix + '/best.pth'
    opt.tensorboard_path = opt.prefix
    opt.record_path = opt.prefix + 'record.txt'

    opt.output()
    
    # load data
    batch_size = opt.batch_size
    train_dataset = STAGNN_Dataset(opt, train=True, val=False)
    val_dataset = STAGNN_Dataset(opt, train=False, val=True)
    test_dataset = STAGNN_Dataset(opt, train=False, val=False)

    train_iter = torch.utils.data.DataLoader(train_dataset, batch_size, shuffle=True)
    val_iter = torch.utils.data.DataLoader(val_dataset, batch_size)
    test_iter = torch.utils.data.DataLoader(test_dataset, batch_size)
    
    # mask
    n_route = opt.n_route
    n_his = opt.n_his
    n_pred = opt.n_pred
    enc_spa_mask = torch.ones(1, 1, n_route, n_route).cuda()
    enc_tem_mask = torch.ones(1, 1, n_his, n_his).cuda()
    dec_slf_mask = torch.tril(torch.ones((1, 1, n_pred + 1, n_pred + 1)), diagonal=0).cuda()
    dec_mul_mask = torch.ones(1, 1, n_pred + 1, n_his).cuda()
    
    # loss
    loss_fn = nn.L1Loss()
    
    MAEs, MAPEs, RMSEs = [], [], []
    for i in range(1):
        # model
        model = getattr(models, opt.model)(
            opt,
            enc_spa_mask, enc_tem_mask,
            dec_slf_mask, dec_mul_mask
        )
        
        # num_params = 0
        # for param in model.parameters():
        #     num_params += param.numel()
        # print(num_params / 1e6)
        # sys.exit()
        model.cuda()
        
        # optimizer
        lr = opt.lr
        if opt.adam['use']:
            optimizer = torch.optim.Adam(model.parameters(), lr=lr, weight_decay = opt.adam['weight_decay'])
        
        # scheduler
        if opt.slr['use']:
            step_size, gamma = opt.slr['step_size'], opt.slr['gamma']
            scheduler = torch.optim.lr_scheduler.StepLR(optimizer, step_size=step_size, gamma=gamma)
        elif opt.mslr['use']:
            milestones, gamma = opt.mslr['milestones'], opt.mslr['gamma']
            scheduler = torch.optim.lr_scheduler.MultiStepLR(optimizer, milestones, gamma=gamma)
        
        # resume
        start_epoch = opt.start_epoch
        min_val_loss = np.inf
        checkpoint_temp_path = opt.checkpoint_temp_path
        if opt.resume:
            if os.path.isfile(checkpoint_temp_path):
                checkpoint = torch.load(checkpoint_temp_path)
                start_epoch = checkpoint['epoch'] + 1
                min_val_loss = checkpoint['min_loss']
                model.load_state_dict(checkpoint['model'])
                optimizer.load_state_dict(checkpoint['optimizer'])
                print('=> loaded checkpoint (epoch {})'.format(checkpoint['epoch']))  
                
        # tensorboard
        tensorboard_path = opt.tensorboard_path + str(start_epoch)
        writer = SummaryWriter(tensorboard_path)
        
        # train
        name = opt.name
        epochs = opt.epochs
        checkpoint = None
        checkpoint_temp_path = opt.checkpoint_temp_path
        for epoch in range(start_epoch, start_epoch + epochs):
            model.train()        
            loss_sum, n = 0.0, 0
            for x, y in train_iter:
                x, y = x.cuda(), y.cuda()
                x = x.type(torch.cuda.FloatTensor)
                y = y.type(torch.cuda.FloatTensor)
                _, loss = model(x, y, epoch)
                optimizer.zero_grad()
                loss.backward()
                optimizer.step()
                loss_sum += loss.item()
                n += 1
            scheduler.step()
            
            model.eval()
            
            val_loss = test(model, loss_fn, val_iter, opt)
            # K_S = torch.sum(torch.abs(model.encoder.layer_stack[0].stgc.K_S)).item()
            # K_T = torch.sum(torch.abs(model.encoder.layer_stack[0].stgc.K_T)).item()
            # V_S = torch.sum(torch.abs(model.encoder.layer_stack[0].stgc.V_S)).item()
            # V_T = torch.sum(torch.abs(model.encoder.layer_stack[0].stgc.V_T)).item()
            # print('epoch', epoch, ' ', name, ', train loss:', loss_sum / n, ', validation loss:', val_loss, ', lr:', optimizer.param_groups[0]['lr'])
            # print('epoch', epoch, ' ', name, ', train loss:', loss_sum / n, ', validation loss:', val_loss, ', ', K_S, K_T, V_S, V_T)
            print('epoch', epoch, ' ', name, ', train loss:', loss_sum / n, ', validation loss:', val_loss)
            if val_loss < min_val_loss:
                min_val_loss = val_loss
                checkpoint = {
                    'epoch': epoch,
                    'min_loss': min_val_loss,
                    'model': model.state_dict(),
                    'optimizer': optimizer.state_dict()
                }
                torch.save(checkpoint, checkpoint_temp_path)
              
                MAE, MAPE, RMSE = evaluate_metric(model, test_iter, opt)
                print("MAE:", MAE, ", MAPE:", MAPE, "%, RMSE:", RMSE)
            writer.add_scalar('train loss', loss_sum / n, epoch)
            writer.add_scalar('test loss', val_loss, epoch)

        checkpoint_best_path = opt.checkpoint_best_path
        torch.save(checkpoint, checkpoint_best_path)
        
        checkpoint = torch.load(checkpoint_best_path)
        best_model = getattr(models, opt.model)(
            opt,
            enc_spa_mask, enc_tem_mask,
            dec_slf_mask, dec_mul_mask
        )
        best_model.load_state_dict(checkpoint['model'])
        best_model.cuda()
        best_model.eval()
        
        # writer = SummaryWriter('/tmp')
        
        test_loss = test(best_model, loss_fn, test_iter, opt)
        if opt.mode == 1:
            MAE, MAPE, RMSE = evaluate_metric(best_model, test_iter, opt)
            MAEs.append(MAE)
            MAPEs.append(MAPE)
            RMSEs.append(RMSE)
            print("test loss:", test_loss, "\nMAE:", MAE, ", MAPE:", MAPE, "%, RMSE:", RMSE)
        elif opt.mode == 2:
            RAE, RSE, COR = evaluate_metric(best_model, test_iter, opt)
            print("test loss:", test_loss, "\nRAE:", RAE, ", RSE:", RSE, "%, RMSE:", COR)
        print('='*20)
    MAEs = np.array(MAEs)
    MAPEs = np.array(MAPEs)
    RMSEs = np.array(RMSEs)

    MAE_mean, MAE_std = np.mean(MAEs, axis=0), np.std(MAEs, axis=0, ddof=1)
    MAPE_mean, MAPE_std = np.mean(MAPEs, axis=0), np.std(MAPEs, axis=0, ddof=1)
    RMSE_mean, RMSE_std = np.mean(RMSEs, axis=0), np.std(RMSEs, axis=0, ddof=1)
    np.savez(opt.prefix + '/result.npz', MAE=MAEs, MAPE=MAPEs, RMSE=RMSEs)
    print("\nMAE_mean:", MAE_mean, ", MAPE_mean:", MAPE_mean, ", RMSE_mean:", RMSE_mean)
    print("\nMAE_std:", MAE_std, ", MAPE_std:", MAPE_std, ", RMSE_std:", RMSE_std)

if __name__ == '__main__':
    import fire
    fire.Fire()
