# Supplementary material
Source: ML conference proceedings conference paper supplement (https://proceedings.neurips.cc/paper_files/paper/2022/hash/7b102c908e9404dd040599c65db4ce3e-Abstract.html)
Supplement: Supplementary file 1 [file 7b102c908e9404dd040599c65db4ce3e-Supplemental-Conference.zip › 663_multivariate_time_series_forec-Supplementary Material/code/README.md]

# Requirements
`pip install -r requirements.txt`
# Data
## Multi-step forecasting
PeMSD7(M) saved in folder `/PeMS`, and PeMS_BAY saved in folder `/PeMS_BAY`.
## Single-step forecasting
Download Solar-Energy, Traffic, Electricity, Exchange-rate datasets from the website Uncompress them and move them to the data folder.
# Train
python main_stamp.py train
# Generate Synthetic Dataset
python synthetic_mtsdata.py
