# Supplementary material
Source: ML conference proceedings conference paper supplement (https://proceedings.neurips.cc/paper_files/paper/2022/hash/7b102c908e9404dd040599c65db4ce3e-Abstract.html)
Supplement: Supplementary file 1 [file 7b102c908e9404dd040599c65db4ce3e-Supplemental-Conference.zip › 663_multivariate_time_series_forec-Supplementary Material/code/requirements.txt]

backports.functools-lru-cache==1.6.4
cffi==1.14.5
click==7.1.2
cryptography==3.3.2
cycler==0.10.0
enum34==1.1.10
Flask==1.1.2
Flask-Cors==3.0.10
ipaddress==1.0.23
itsdangerous==1.1.0
Jinja2==2.11.3
kiwisolver==1.1.0
MarkupSafe==1.1.1
matplotlib==2.2.5
numpy==1.16.6
pycparser==2.20
pycurl==7.43.0
pyliblzma==0.5.3
pyOpenSSL==20.0.1
pyparsing==2.4.7
pysqlite==1.0.1
python-dateutil==2.8.1
pytz==2021.1
PyYAML==5.4.1
rpm-python==4.12.0.1
six==1.15.0
subprocess32==3.5.4
urlgrabber==3.9.1
Werkzeug==1.0.1
yum-metadata-parser==1.1.4
